# Supplementary material for: Effects of ‘Candidatus Liberibacter solanacearum’ haplotypes A and B on tomato gene expression and geotropism
Source: PubMed Central journal article supplement (PMC8966271; doi:10.1186/s12870-022-03505-z), 2022-03-30
Supplement: 12870_2022_3505_MOESM1_ESM.pdf [file 12870_2022_3505_MOESM1_ESM.pdf]

| Sample   | Total Reads | Overall Alignment Rate % |
|----------|-------------|--------------------------|
| Control1 | 17358465    | 96.31                    |
| Control2 | 16461183    | 96.45                    |
| Control3 | 18455303    | 95.99                    |
| LsoFree1 | 18557929    | 95.79                    |
| LsoFree2 | 17347190    | 96.64                    |
| LsoFree3 | 18381570    | 96.10                    |
| LsoB1    | 27747327    | 96.19                    |
| LsoB2    | 27794036    | 95.74                    |
| LsoB3    | 35649880    | 94.81                    |
| LsoA1    | 33426003    | 94.18                    |
| LsoA2    | 32938709    | 94.39                    |
| LsoA3    | 33593288    | 94.28                    |
