# Supplementary material for: Effects of ‘Candidatus Liberibacter solanacearum’ haplotypes A and B on tomato gene expression and geotropism
Source: PubMed Central journal article supplement (PMC8966271; doi:10.1186/s12870-022-03505-z), 2022-03-30
Supplement: 12870_2022_3505_MOESM2_ESM.pdf [file 12870_2022_3505_MOESM2_ESM.pdf]

| TomatoID         | p-value | q-value | DE in Infected | Control1 FPKM | Control2 FPKM | Control3 FPKM | LsoFree1 FPKM | LsoFree2 FPKM | LsoFree3 FPKM | LsoB1 FPKM | LsoB2 FPKM | LsoB3 FPKM | LsoA1 FPKM | LsoA2 FPKM | LsoA3 FPKM |
|------------------|---------|---------|----------------|---------------|---------------|---------------|---------------|---------------|---------------|------------|------------|------------|------------|------------|------------|
| Solyc03g098790.3 | 0.001   | 0.016   | 11.71          | 0             | 0.09          | 0             | 0.09          | 0             | 0.47          | 459.85     | 225.86     | 16.23      | 5458.74    | 6056.46    | 8923.11    |
| Solyc00g068980.2 | <0.001  | <0.001  | 9.43           | 0             | 0             | 0             | 0             | 0             | 0             | 197.45     | 347.84     | 520.03     | 1201.28    | 1236.01    | 811.74     |
| Solyc12g010020.2 | <0.001  | 0.005   | 9.14           | 0             | 0.09          | 0             | 0.65          | 0             | 1.19          | 55.29      | 84.19      | 67.56      | 450.61     | 426.8      | 1927.93    |
| Solyc00g187050.3 | <0.001  | 0.005   | 8.79           | 0             | 0.29          | 0             | 0             | 0             | 0             | 37.32      | 46.94      | 40.74      | 276.48     | 270.57     | 1350.07    |
| Solyc12g010025.1 | <0.001  | 0.006   | 8.79           | 0             | 0.01          | 0             | 0.63          | 0             | 1.01          | 41.67      | 55.04      | 46.89      | 313.69     | 315.27     | 1540.32    |
| Solyc12g010030.2 | <0.001  | 0.007   | 8.64           | 0             | 0.35          | 0             | 0             | 0             | 0             | 33.96      | 25.74      | 27.32      | 214.93     | 233.33     | 1277.21    |
| Solyc09g089530.3 | 0.005   | 0.041   | 8.43           | 0             | 0             | 0             | 0             | 0             | 0             | 13.07      | 8.56       | 1.91       | 265.21     | 713.65     | 1149.07    |
| Solyc09g084470.3 | 0.002   | 0.026   | 8.38           | 2.63          | 27.84         | 1.67          | 27.97         | 6.96          | 18.4          | 1802.24    | 515.29     | 56.9       | 4462.38    | 4631.07    | 6792.8     |
| Solyc09g084480.3 | 0.002   | 0.026   | 8.38           | 0             | 0             | 0             | 2.01          | 0             | 1.59          | 105.95     | 73.74      | 26.13      | 1198.31    | 2306.86    | 3633.38    |
| Solyc09g084490.3 | 0.002   | 0.026   | 8.38           | 0             | 2.62          | 0             | 0.44          | 0             | 0.56          | 338.38     | 76.4       | 13.55      | 549.22     | 494.58     | 1115.14    |
| Solyc08g074630.2 | 0.003   | 0.031   | 8.19           | 0             | 1.56          | 0.22          | 1.17          | 1.63          | 0.95          | 129.77     | 51.12      | 8.63       | 953.78     | 1262.58    | 1553.81    |
| Solyc01g095140.3 | <0.001  | 0.013   | 7.9            | 0.1           | 0             | 0.3           | 0             | 0             | 0.32          | 10.15      | 409.04     | 378.43     | 152.11     | 174.51     | 604.78     |

| TomatoID         | p-value | q-value | DE in Infected | Control1 FPKM | Control2 FPKM | Control3 FPKM | LsoFree1 FPKM | LsoFree2 FPKM | LsoFree3 FPKM | LsoB1 FPKM | LsoB2 FPKM | LsoB3 FPKM | LsoA1 FPKM | LsoA2 FPKM | LsoA3 FPKM |
|------------------|---------|---------|----------------|---------------|---------------|---------------|---------------|---------------|---------------|------------|------------|------------|------------|------------|------------|
| Solyc03g098780.2 | 0.007   | 0.046   | 7.43           | 1.37          | 72.34         | 6.14          | 39.23         | 5.35          | 14.65         | 780.4      | 350.79     | 44.99      | 3007.29    | 3292.29    | 4952.38    |
| Solyc09g083440.3 | 0.003   | 0.032   | 7.35           | 0.98          | 16.06         | 2.92          | 68.97         | 1.78          | 28.3          | 446.15     | 351.37     | 99.93      | 1878.59    | 1481.5     | 2841.52    |
| Solyc06g062370.3 | 0.003   | 0.03    | 7.18           | 0.07          | 1.79          | 0.1           | 0             | 0.38          | 0             | 58.1       | 22.45      | 2.09       | 230.5      | 208.25     | 416.74     |
| Solyc09g084450.3 | 0.002   | 0.026   | 6.67           | 0.77          | 2.09          | 0.6           | 0             | 0.52          | 0.25          | 23.32      | 6.8        | 3.58       | 108.89     | 147.88     | 347.91     |
| Solyc09g089520.3 | 0.006   | 0.043   | 6.6            | 0             | 0             | 0.2           | 0             | 0             | 0             | 3.27       | 4.5        | 0.63       | 53.19      | 83.04      | 365.43     |
| Solyc09g008670.3 | 0.003   | 0.029   | 6.58           | 0.2           | 1.46          | 0.32          | 0             | 0.09          | 0.48          | 10.63      | 10.96      | 1.74       | 97.06      | 95.73      | 320.81     |
| Solyc12g096780.2 | 0.008   | 0.05    | 6.48           | 0             | 0.19          | 0             | 0             | 0             | 0             | 7.4        | 7.77       | 0.49       | 147        | 111.53     | 242.11     |
| Solyc07g007250.3 | 0.001   | 0.015   | 6.31           | 32.55         | 49.05         | 22.87         | 62.74         | 40.18         | 62.86         | 1790.18    | 835.11     | 305.16     | 4705.42    | 4958.53    | 6135.3     |
| Solyc09g089505.1 | 0.007   | 0.048   | 6.29           | 11.86         | 165.45        | 31.76         | 209.23        | 17            | 141.08        | 1077.31    | 595.73     | 143.58     | 3622.76    | 4980.13    | 7736.01    |
| Solyc09g089510.3 | 0.007   | 0.048   | 6.29           | 0.22          | 3.44          | 0.6           | 8.39          | 0.64          | 3.41          | 7.59       | 3.16       | 4.15       | 26.24      | 79.19      | 52.08      |
| Solyc11g027770.1 | <0.001  | 0.001   | 6.16           | 0.12          | 0.03          | 0.02          | 0             | 0             | 0.04          | 22.83      | 38.71      | 52.67      | 115.03     | 120.02     | 83.33      |
| Solyc07g008570.3 | 0.001   | 0.019   | 6.14           | 0.43          | 0.28          | 0.09          | 0.45          | 0.36          | 0.59          | 12.94      | 10.92      | 4.37       | 65.28      | 73.5       | 253.19     |

| TomatoID         | p-value | q-value | DE in Infected | Control1 FPKM | Control2 FPKM | Control3 FPKM | LsoFree1 FPKM | LsoFree2 FPKM | LsoFree3 FPKM | LsoB1 FPKM | LsoB2 FPKM | LsoB3 FPKM | LsoA1 FPKM | LsoA2 FPKM | LsoA3 FPKM |
|------------------|---------|---------|----------------|---------------|---------------|---------------|---------------|---------------|---------------|------------|------------|------------|------------|------------|------------|
| Solyc11g021060.2 | 0.006   | 0.044   | 6.13           | 0             | 3.38          | 0.58          | 1.8           | 1.77          | 0.22          | 41.43      | 16.01      | 4.2        | 216        | 143.16     | 478        |
| Solyc01g091170.3 | 0.001   | 0.019   | 6.1            | 4.91          | 4.79          | 2.77          | 11.3          | 2.71          | 7.54          | 60.6       | 74.68      | 22.42      | 249.59     | 337.43     | 1023.2     |
| Solyc01g017490.1 | <0.001  | 0.004   | 6.06           | 0             | 0             | 0             | 0             | 0.11          | 0.1           | 18.07      | 27.24      | 48.13      | 107.91     | 133.13     | 83.65      |
| Solyc06g083900.3 | 0.002   | 0.022   | 6.03           | 0             | 1.96          | 0             | 0             | 0.24          | 0.08          | 17.15      | 20.46      | 3.9        | 125.86     | 63.53      | 180.79     |
| Solyc07g064600.3 | 0.001   | 0.015   | 5.98           | 2             | 2.77          | 1.94          | 8.03          | 2.13          | 6.39          | 41.77      | 51.87      | 34.61      | 222.07     | 221.93     | 645.66     |
| Solyc12g010980.2 | 0.003   | 0.032   | 5.65           | 1.97          | 14.85         | 1.96          | 1.28          | 2.45          | 0.31          | 19.68      | 57.66      | 20.82      | 176.47     | 120.89     | 471.31     |
| Solyc11g051200.1 | <0.001  | 0.003   | 5.6            | 0             | 0             | 0             | 0             | 0             | 0             | 14.49      | 22.49      | 34.84      | 72.73      | 78.73      | 56.16      |
| Solyc11g071480.1 | 0.008   | 0.05    | 5.55           | 0             | 0             | 0             | 0             | 0             | 0             | 3.25       | 1.93       | 0.41       | 35.23      | 46.69      | 128.14     |
| Solyc01g006400.3 | 0.005   | 0.039   | 4.94           | 55.08         | 96.46         | 59.12         | 75.92         | 27.95         | 45.96         | 354.34     | 175.51     | 64.57      | 1652.69    | 1468.23    | 2601.8     |
| Solyc12g009220.2 | 0.001   | 0.016   | 4.88           | 4.88          | 1.78          | 2.92          | 3.41          | 3.1           | 5.37          | 27.84      | 337.98     | 325.22     | 255.76     | 195.09     | 137.06     |
| Solyc01g017050.1 | <0.001  | 0.008   | 4.87           | 11.83         | 22.11         | 23.27         | 19.78         | 8.42          | 31.33         | 104.78     | 159.91     | 262.44     | 543.79     | 644.38     | 457.2      |
| Solyc11g022590.1 | 0.004   | 0.036   | 4.84           | 99.62         | 232.33        | 235.27        | 544.02        | 45.34         | 624.43        | 1745.38    | 1019.87    | 325.79     | 4651.74    | 3942.3     | 4536.27    |

| TomatoID         | p-value | q-value | DE in Infected | Control1 FPKM | Control2 FPKM | Control3 FPKM | LsoFree1 FPKM | LsoFree2 FPKM | LsoFree3 FPKM | LsoB1 FPKM | LsoB2 FPKM | LsoB3 FPKM | LsoA1 FPKM | LsoA2 FPKM | LsoA3 FPKM |
|------------------|---------|---------|----------------|---------------|---------------|---------------|---------------|---------------|---------------|------------|------------|------------|------------|------------|------------|
| Solyc06g076020.3 | <0.001  | 0.01    | 4.79           | 6.51          | 5.45          | 4.66          | 2.69          | 4.97          | 2.08          | 44.4       | 270.44     | 358.95     | 114.02     | 132.63     | 191.78     |
| Solyc02g081980.3 | 0.021   | 0.089   | 4.78           | 2.03          | 18.53         | 3.19          | 4.81          | 3.02          | 0.38          | 20.74      | 30.62      | 4.38       | 166.75     | 133.79     | 353.04     |
| Solyc01g060020.3 | <0.001  | 0.014   | 4.77           | 0             | 0             | 0             | 0             | 0             | 0             | 55.72      | 40.21      | 74.79      | 111.91     | 7.86       | 20.58      |
| Solyc10g005320.3 | 0.008   | 0.052   | 4.7            | 0.06          | 0.47          | 0.08          | 0.72          | 0.48          | 2.84          | 1.11       | 8.93       | 20.56      | 3.79       | 9.58       | 172.7      |
| Solyc12g096770.1 | 0.003   | 0.031   | 4.69           | 2.88          | 18.76         | 4.54          | 4.48          | 4.21          | 1.95          | 47.55      | 48.4       | 14.78      | 160.15     | 116.52     | 294.85     |
| Solyc02g093180.3 | <0.001  | 0.008   | 4.66           | 0.13          | 0.29          | 0             | 0.07          | 0.06          | 0.05          | 5.07       | 4.9        | 5.73       | 14.29      | 13.3       | 59.11      |
| Solyc04g077980.1 | 0.001   | 0.015   | 4.66           | 9.52          | 4.83          | 4.45          | 5.69          | 4.38          | 7.95          | 135.7      | 544.66     | 955.56     | 205.99     | 643.75     | 93.28      |
| Solyc07g040960.1 | 0.002   | 0.024   | 4.66           | 1.08          | 1.13          | 2.17          | 1.84          | 1.9           | 1.94          | 71.65      | 363.21     | 589.85     | 115.55     | 592.52     | 30.52      |
| Solyc11g071740.2 | 0.004   | 0.037   | 4.64           | 0.72          | 0.41          | 0.17          | 1.06          | 0.33          | 0.93          | 10         | 299.23     | 246.25     | 98.02      | 187.57     | 30.21      |

| TomatoID         | p-value | q-value | DE in Infected | Control1 FPKM | Control2 FPKM | Control3 FPKM | LsoFree1 FPKM | LsoFree2 FPKM | LsoFree3 FPKM | LsoB1 FPKM | LsoB2 FPKM | LsoB3 FPKM | LsoA1 FPKM | LsoA2 FPKM | LsoA3 FPKM |
|------------------|---------|---------|----------------|---------------|---------------|---------------|---------------|---------------|---------------|------------|------------|------------|------------|------------|------------|
| Solyc03g116890.3 | 0.001   | 0.015   | 4.56           | 1.15          | 0.66          | 0.78          | 0.42          | 1.57          | 1.15          | 11.88      | 135.1      | 124.23     | 76.34      | 41.78      | 63.03      |
| Solyc04g074770.2 | 0.001   | 0.022   | 4.55           | 4.02          | 5.04          | 2.17          | 4.26          | 2.65          | 0.69          | 13.41      | 24.18      | 25.6       | 38.15      | 59.07      | 258.85     |
| Solyc11g011030.2 | <0.001  | 0.01    | 4.51           | 6.71          | 17.45         | 9.57          | 14.75         | 13.39         | 15.34         | 78.57      | 221.14     | 122.07     | 254.46     | 229.37     | 665.13     |
| Solyc09g010980.1 | 0.002   | 0.027   | 4.49           | 1.52          | 3.82          | 2.05          | 0.54          | 0.47          | 1.16          | 12.16      | 161.04     | 165.44     | 94.53      | 67.95      | 34.51      |
| Solyc04g079730.1 | 0.006   | 0.043   | 4.4            | 0.94          | 0.63          | 1.19          | 0.56          | 0.88          | 0.85          | 1.78       | 49.94      | 19.84      | 69.07      | 32.17      | 76.4       |
| Solyc03g098760.2 | 0.006   | 0.043   | 4.38           | 0             | 0             | 0.25          | 0             | 0             | 0.09          | 0.76       | 0.93       | 0.6        | 4.88       | 1.72       | 91.08      |
| Solyc11g018777.1 | 0.012   | 0.066   | 4.31           | 0.39          | 1.75          | 0.8           | 0             | 0.39          | 0.42          | 4.05       | 210.27     | 151.57     | 112.34     | 44.89      | 26.86      |
| Solyc00g012430.1 | <0.001  | 0.008   | 4.3            | 11.86         | 21.01         | 13.82         | 12.65         | 11.38         | 15.4          | 87.75      | 137.57     | 205.75     | 439.23     | 471.66     | 303.3      |
| Solyc02g090970.1 | <0.001  | 0.013   | 4.29           | 0.24          | 0.19          | 0.17          | 0.4           | 0.24          | 0.96          | 6          | 39.35      | 49.64      | 44.58      | 48.45      | 26.6       |
| Solyc03g098730.1 | 0.001   | 0.022   | 4.26           | 7.52          | 3.19          | 4.51          | 2.72          | 6.93          | 4.88          | 32.8       | 326.27     | 454.8      | 232.45     | 136.55     | 125.59     |
| Solyc06g066800.2 | 0.01    | 0.058   | 4.25           | 1.49          | 8.91          | 3.62          | 2.08          | 2.81          | 0.65          | 6.8        | 169.52     | 157.14     | 77.03      | 61         | 130.34     |
| Solyc07g056000.2 | 0.006   | 0.042   | 4.25           | 0.38          | 1.52          | 0.33          | 0.57          | 0.35          | 0.1           | 9.65       | 52.98      | 248.06     | 59.86      | 168.37     | 18.02      |

| TomatoID         | p-value | q-value | DE in Infected | Control1 FPKM | Control2 FPKM | Control3 FPKM | LsoFree1 FPKM | LsoFree2 FPKM | LsoFree3 FPKM | LsoB1 FPKM | LsoB2 FPKM | LsoB3 FPKM | LsoA1 FPKM | LsoA2 FPKM | LsoA3 FPKM |
|------------------|---------|---------|----------------|---------------|---------------|---------------|---------------|---------------|---------------|------------|------------|------------|------------|------------|------------|
| Solyc02g083880.3 | <0.001  | 0.007   | 4.24           | 1.43          | 0.33          | 0             | 0             | 0.17          | 0             | 8.75       | 35.39      | 29.05      | 13.43      | 12.59      | 32.75      |
| Solyc07g042170.3 | <0.001  | 0.012   | 4.24           | 9.52          | 11.51         | 9.22          | 12.47         | 11.53         | 7.2           | 46.49      | 266.42     | 189.34     | 234.86     | 210.16     | 411.81     |
| Solyc04g074430.1 | 0.005   | 0.039   | 4.13           | 0.74          | 4.47          | 2.62          | 1.4           | 0.98          | 0.81          | 21.26      | 130.95     | 320.21     | 77.4       | 176.51     | 23.45      |
| Solyc08g036640.3 | 0.019   | 0.082   | 4.11           | 0             | 0             | 0             | 0             | 0             | 0.91          | 0          | 43.83      | 14.03      | 30.48      | 16.84      | 37.56      |
| Solyc04g007580.1 | 0.006   | 0.044   | 4.1            | 2.12          | 1.58          | 1.71          | 0.78          | 2.02          | 0.75          | 34.23      | 370.54     | 536.07     | 142.52     | 303.87     | 19.67      |
| Solyc12g049400.2 | 0.003   | 0.029   | 4.1            | 1.24          | 1.61          | 0.57          | 6.15          | 2.12          | 4.59          | 11.92      | 22.97      | 18.98      | 29.4       | 45.73      | 158        |
| Solyc07g006560.3 | 0.008   | 0.052   | 4.09           | 0.29          | 1.6           | 0.53          | 4.55          | 3.32          | 4.32          | 34.87      | 20.89      | 4.91       | 43.66      | 51.63      | 143.25     |
| Solyc05g015800.3 | 0.003   | 0.033   | 4.08           | 0.41          | 0.45          | 0.28          | 0             | 0.61          | 0.15          | 2.35       | 4.58       | 1.39       | 9.5        | 10.48      | 64.28      |
| Solyc10g086180.2 | 0.007   | 0.047   | 4.08           | 6.36          | 27.85         | 7.76          | 12.23         | 15.24         | 4.59          | 54.48      | 76.09      | 33.4       | 208.97     | 169.98     | 615.77     |
| Solyc08g076970.3 | 0.001   | 0.02    | 4.06           | 19.66         | 89.31         | 40.09         | 108.68        | 68.35         | 102           | 942.52     | 537.55     | 353.55     | 1329.68    | 1093.23    | 1799.57    |

| TomatoID         | p-value | q-value | DE in Infected | Control1 FPKM | Control2 FPKM | Control3 FPKM | LsoFree1 FPKM | LsoFree2 FPKM | LsoFree3 FPKM | LsoB1 FPKM | LsoB2 FPKM | LsoB3 FPKM | LsoA1 FPKM | LsoA2 FPKM | LsoA3 FPKM |
|------------------|---------|---------|----------------|---------------|---------------|---------------|---------------|---------------|---------------|------------|------------|------------|------------|------------|------------|
| Solyc11g071760.3 | 0.014   | 0.071   | 4.06           | 0             | 0             | 0             | 0             | 0             | 0             | 1.19       | 100.76     | 75.83      | 39.74      | 31.03      | 19.57      |
| Solyc06g051940.3 | 0.001   | 0.021   | 4.04           | 0.4           | 1.52          | 0.43          | 0.88          | 0.19          | 0.48          | 3.64       | 4.18       | 4.48       | 22.4       | 12.65      | 50.51      |
| Solyc01g007030.3 | 0.004   | 0.035   | 3.99           | 0.1           | 0             | 0.14          | 0             | 0.1           | 0.19          | 5.87       | 103.62     | 79.34      | 34.72      | 80.11      | 11.27      |
| Solyc03g013160.3 | 0.001   | 0.017   | 3.99           | 3.83          | 2.87          | 2.12          | 1.42          | 2.93          | 1.89          | 8.93       | 15.55      | 16.92      | 37.79      | 20.27      | 125.32     |
| Solyc12g019320.2 | 0.001   | 0.016   | 3.99           | 1.86          | 7.5           | 2.58          | 8.09          | 4.4           | 3.72          | 29.14      | 45.27      | 35.78      | 76.07      | 55.31      | 203.35     |
| Solyc11g018805.1 | 0.009   | 0.054   | 3.98           | 0.27          | 1.3           | 0.39          | 0.47          | 0             | 0             | 5.65       | 157.15     | 118.89     | 85.55      | 33.26      | 15.99      |
| Solyc07g041920.3 | 0.014   | 0.072   | 3.88           | 3.91          | 15.13         | 3.62          | 2.4           | 9.15          | 0.76          | 87         | 25.72      | 9.3        | 67.02      | 114.14     | 162.21     |
| Solyc00g071180.3 | 0.013   | 0.068   | 3.87           | 0             | 0             | 0             | 0             | 0             | 0             | 0.05       | 0.08       | 0.13       | 1.06       | 3.96       | 59.38      |
| Solyc12g017460.1 | <0.001  | 0.007   | 3.85           | 11.16         | 7.96          | 7.43          | 6.9           | 6.63          | 6.36          | 32.23      | 104.01     | 111.78     | 83.41      | 58.61      | 196.61     |
| Solyc03g026280.3 | 0.011   | 0.061   | 3.8            | 0.55          | 0.21          | 0.42          | 0.61          | 0.27          | 0.65          | 21.53      | 113.56     | 180.79     | 23.85      | 210.4      | 7.37       |
| Solyc02g087210.3 | 0.011   | 0.062   | 3.79           | 3.03          | 2.43          | 1.69          | 2.2           | 4.7           | 1.88          | 6.43       | 205.27     | 155.72     | 92.92      | 99.35      | 95.73      |
| Solyc10g086500.1 | 0.004   | 0.034   | 3.78           | 7.67          | 20.99         | 14.63         | 34.51         | 9.24          | 12.34         | 51.56      | 102.96     | 41.08      | 236.26     | 200.69     | 388.19     |
| Solyc00g145170.2 | 0.012   | 0.063   | 3.77           | 0             | 0             | 0             | 0             | 0             | 0             | 0.71       | 0.39       | 0          | 5.55       | 9.46       | 34.77      |

| TomatoID         | p-value | q-value | DE in Infected | Control1 FPKM | Control2 FPKM | Control3 FPKM | LsoFree1 FPKM | LsoFree2 FPKM | LsoFree3 FPKM | LsoB1 FPKM | LsoB2 FPKM | LsoB3 FPKM | LsoA1 FPKM | LsoA2 FPKM | LsoA3 FPKM |
|------------------|---------|---------|----------------|---------------|---------------|---------------|---------------|---------------|---------------|------------|------------|------------|------------|------------|------------|
| Solyc11g018800.2 | 0.01    | 0.06    | 3.77           | 0.3           | 1.02          | 0.19          | 0.12          | 0             | 0.12          | 2.22       | 75.16      | 43.17      | 65.33      | 20.76      | 16.84      |
| Solyc08g036660.3 | 0.006   | 0.044   | 3.75           | 0             | 0             | 0             | 0             | 0             | 0             | 0.43       | 16.14      | 7.39       | 16.18      | 6.1        | 29.57      |
| Solyc12g057060.2 | 0.002   | 0.027   | 3.74           | 6.24          | 6.08          | 8.54          | 19.98         | 4.27          | 14.85         | 19.87      | 31.75      | 29.45      | 78.92      | 98.64      | 205.19     |
| Solyc02g087540.2 | 0.003   | 0.031   | 3.72           | 0.38          | 0.59          | 0.2           | 0.31          | 0.42          | 0.33          | 11.03      | 92.82      | 163.58     | 45.12      | 51.02      | 11.53      |
| Solyc08g007830.1 | 0.018   | 0.081   | 3.72           | 0             | 0             | 0             | 0             | 0             | 0.09          | 0.59       | 57.71      | 47.73      | 28.85      | 16.16      | 17.64      |
| Solyc06g073830.1 | 0.003   | 0.034   | 3.69           | 0.91          | 0.45          | 0.67          | 1.15          | 0.46          | 0.68          | 3          | 40.93      | 48.76      | 13.62      | 20.92      | 32.07      |
| Solyc08g068600.3 | 0.002   | 0.028   | 3.68           | 1.8           | 2.12          | 1             | 1.49          | 1.32          | 0.38          | 26.6       | 123.4      | 269.61     | 68.21      | 118.51     | 17.64      |
| Solyc11g071470.1 | <0.001  | 0.003   | 3.65           | 0.05          | 0             | 0.05          | 0             | 0.05          | 0             | 4.93       | 12.64      | 9.76       | 16.36      | 6.87       | 16.73      |
| Solyc01g096670.3 | 0.002   | 0.025   | 3.64           | 3.98          | 9.99          | 4             | 6.71          | 6.16          | 2.46          | 22.97      | 28.83      | 23.62      | 46.6       | 47.53      | 204.85     |
| Solyc05g005150.1 | <0.001  | 0.006   | 3.64           | 6.88          | 10.94         | 4.86          | 4.04          | 6.08          | 4.38          | 39.33      | 98.51      | 117.88     | 94.19      | 141.18     | 91.96      |

| TomatoID         | p-value | q-value | DE in Infected | Control1 FPKM | Control2 FPKM | Control3 FPKM | LsoFree1 FPKM | LsoFree2 FPKM | LsoFree3 FPKM | LsoB1 FPKM | LsoB2 FPKM | LsoB3 FPKM | LsoA1 FPKM | LsoA2 FPKM | LsoA3 FPKM |
|------------------|---------|---------|----------------|---------------|---------------|---------------|---------------|---------------|---------------|------------|------------|------------|------------|------------|------------|
| Solyc06g035700.1 | 0.024   | 0.096   | 3.64           | 0             | 0             | 0             | 0             | 0             | 0             | 0.56       | 51.36      | 32.09      | 55.1       | 41.63      | 12.43      |
| Solyc01g007040.3 | 0.006   | 0.045   | 3.63           | 0             | 0             | 0.06          | 0.2           | 0             | 0             | 4.31       | 84.86      | 58.2       | 27.28      | 60.53      | 8.72       |
| Solyc04g072375.1 | 0.001   | 0.015   | 3.63           | 1.18          | 0.41          | 1.89          | 0.06          | 0.78          | 0.53          | 5.53       | 13.59      | 23.93      | 12.08      | 4.84       | 27.91      |
| Solyc02g079590.3 | <0.001  | 0.004   | 3.62           | 0.93          | 1.25          | 0.68          | 1.4           | 1.51          | 1.74          | 16.01      | 31.29      | 57.86      | 21.86      | 20.18      | 36.83      |
| Solyc01g068065.1 | 0.002   | 0.025   | 3.61           | 0.17          | 5.77          | 5.31          | 0             | 0             | 4.74          | 14.59      | 11.57      | 11.06      | 13.28      | 11.01      | 12.39      |
| Solyc11g010250.1 | 0.001   | 0.019   | 3.61           | 5.11          | 10.34         | 8.95          | 7.05          | 6.06          | 2.74          | 54.62      | 272.95     | 267.94     | 112.79     | 267.61     | 71.77      |
| Solyc02g086300.3 | <0.001  | 0.002   | 3.6            | 0             | 0.47          | 0.08          | 0.21          | 0             | 0.16          | 5.8        | 14.48      | 17.95      | 11.06      | 16.95      | 14.02      |
| Solyc12g057160.1 | 0.012   | 0.065   | 3.6            | 0.91          | 3.06          | 1.09          | 1.28          | 0.06          | 0.31          | 6.69       | 97.51      | 104.55     | 42.18      | 79.51      | 12.99      |
| Solyc11g010170.2 | 0.006   | 0.044   | 3.58           | 2.92          | 3.67          | 2.85          | 4.54          | 4.28          | 2.85          | 7.8        | 16.93      | 9.88       | 45.75      | 43.34      | 146.4      |
| Solyc11g044620.1 | <0.001  | 0.013   | 3.55           | 1.32          | 2.93          | 3             | 2.25          | 1.19          | 2.67          | 9.28       | 11.27      | 16.65      | 40.79      | 45.25      | 35.03      |
| Solyc07g064650.2 | <0.001  | 0.001   | 3.54           | 0             | 0             | 0.36          | 0.61          | 0             | 0.44          | 7.98       | 10.14      | 12.1       | 9.91       | 6.57       | 15.89      |
| Solyc10g076660.2 | 0.001   | 0.02    | 3.54           | 0.04          | 0             | 0             | 0.05          | 0.07          | 0.1           | 1.09       | 3.13       | 3.72       | 2.34       | 5.41       | 28.52      |
| Solyc01g095150.3 | 0.003   | 0.029   | 3.53           | 37.98         | 27.95         | 36.46         | 28.68         | 28.18         | 30.24         | 66.16      | 677.63     | 570.84     | 403.32     | 443.63     | 469.65     |

| TomatoID         | p-value | q-value | DE in Infected | Control1 FPKM | Control2 FPKM | Control3 FPKM | LsoFree1 FPKM | LsoFree2 FPKM | LsoFree3 FPKM | LsoB1 FPKM | LsoB2 FPKM | LsoB3 FPKM | LsoA1 FPKM | LsoA2 FPKM | LsoA3 FPKM |
|------------------|---------|---------|----------------|---------------|---------------|---------------|---------------|---------------|---------------|------------|------------|------------|------------|------------|------------|
| Solyc04g074420.1 | 0.002   | 0.024   | 3.53           | 0.24          | 0.67          | 0.11          | 0.59          | 0.14          | 0.12          | 5.53       | 31.87      | 49.13      | 24.09      | 53.95      | 11.49      |
| Solyc06g082530.2 | <0.001  | 0.013   | 3.53           | 3.28          | 5.96          | 3.06          | 3.9           | 3.71          | 2.89          | 14.96      | 24.91      | 18.86      | 37.77      | 31.21      | 110.71     |
| Solyc04g082140.3 | 0.015   | 0.072   | 3.52           | 3.7           | 30.09         | 8.06          | 8.86          | 7.73          | 0.67          | 25.19      | 109.42     | 87.55      | 117.74     | 112.39     | 177.41     |
| Solyc00g095860.1 | 0.005   | 0.039   | 3.51           | 1.62          | 1.39          | 1.33          | 2.07          | 1.81          | 1.98          | 6.16       | 99.83      | 89.65      | 46.93      | 56.85      | 0          |
| Solyc10g009270.3 | 0.001   | 0.016   | 3.5            | 0.21          | 0.37          | 0.24          | 0.24          | 0             | 0.09          | 2.86       | 3.72       | 1.66       | 12.14      | 7.53       | 20.81      |
| Solyc01g108240.3 | 0.012   | 0.065   | 3.44           | 0             | 0             | 0             | 0             | 0             | 0.05          | 0.48       | 31.47      | 13         | 23.77      | 13.99      | 15.3       |
| Solyc06g083130.3 | 0.01    | 0.058   | 3.44           | 0.49          | 0.55          | 0.27          | 0             | 0             | 0.14          | 0.61       | 0.76       | 0.33       | 7.71       | 9.03       | 24.94      |
| Solyc09g011860.3 | 0.009   | 0.056   | 3.44           | 0.75          | 0.82          | 0.45          | 0.2           | 0.92          | 0.26          | 4.14       | 91.05      | 94.95      | 36.97      | 37.22      | 16.58      |
| Solyc09g061840.3 | 0.001   | 0.019   | 3.4            | 13.3          | 11.67         | 14.01         | 10.04         | 24.04         | 11.17         | 55.72      | 124.65     | 156.04     | 75.53      | 76.04      | 360.06     |

| TomatoID         | p-value | q-value | DE in Infected | Control1 FPKM | Control2 FPKM | Control3 FPKM | LsoFree1 FPKM | LsoFree2 FPKM | LsoFree3 FPKM | LsoB1 FPKM | LsoB2 FPKM | LsoB3 FPKM | LsoA1 FPKM | LsoA2 FPKM | LsoA3 FPKM |
|------------------|---------|---------|----------------|---------------|---------------|---------------|---------------|---------------|---------------|------------|------------|------------|------------|------------|------------|
| Solyc10g005480.3 | 0.001   | 0.021   | 3.38           | 2.06          | 1.87          | 1.3           | 1.38          | 1.66          | 2.33          | 14.05      | 82.66      | 114.63     | 65.75      | 46.91      | 22.25      |
| Solyc04g005040.1 | 0.008   | 0.052   | 3.34           | 0.88          | 1.54          | 1.23          | 1.36          | 0.65          | 0.81          | 7.56       | 99.22      | 89.72      | 53.21      | 82.96      | 12.73      |
| Solyc10g084320.2 | 0.042   | 0.135   | 3.34           | 4.02          | 8.89          | 1.84          | 7.17          | 5.46          | 5.28          | 9.23       | 21.4       | 3          | 50.51      | 59.4       | 217.6      |
| Solyc07g052203.1 | 0.001   | 0.017   | 3.33           | 1.16          | 4.16          | 1.19          | 2.12          | 1.24          | 1.76          | 7.89       | 34.92      | 28.28      | 41.2       | 20.89      | 38.03      |
| Solyc03g096050.3 | 0.007   | 0.047   | 3.3            | 1.37          | 3.05          | 1.19          | 1.05          | 2.64          | 0.37          | 5.46       | 7.88       | 4.84       | 19.8       | 20.75      | 61.98      |
| Solyc06g061200.1 | 0.009   | 0.054   | 3.3            | 3.39          | 39.17         | 11.06         | 23.37         | 17.75         | 9.98          | 111.42     | 99.91      | 60.06      | 281.67     | 232.85     | 265.89     |
| Solyc09g072750.2 | 0.038   | 0.128   | 3.3            | 0.49          | 15.09         | 2.19          | 6.51          | 5.74          | 0.84          | 18.03      | 45.07      | 7.96       | 52.81      | 28.71      | 176.22     |
| Solyc12g014430.2 | 0.001   | 0.017   | 3.3            | 0.68          | 1.5           | 0.72          | 0.9           | 0.94          | 0.24          | 4.4        | 6.95       | 4.81       | 11.29      | 10.34      | 36.52      |
| Solyc02g077330.3 | 0.012   | 0.064   | 3.29           | 0             | 5.77          | 0.09          | 0.09          | 0.11          | 0             | 2.68       | 1.55       | 3.3        | 9.85       | 3.56       | 26.97      |
| Solyc03g122340.3 | 0.004   | 0.037   | 3.29           | 7.2           | 8.35          | 8.73          | 9.14          | 7.01          | 7.74          | 13.12      | 117.8      | 110.58     | 119.96     | 113.19     | 121.72     |

| TomatoID         | p-value | q-value | DE in Infected | Control1 FPKM | Control2 FPKM | Control3 FPKM | LsoFree1 FPKM | LsoFree2 FPKM | LsoFree3 FPKM | LsoB1 FPKM | LsoB2 FPKM | LsoB3 FPKM | LsoA1 FPKM | LsoA2 FPKM | LsoA3 FPKM |
|------------------|---------|---------|----------------|---------------|---------------|---------------|---------------|---------------|---------------|------------|------------|------------|------------|------------|------------|
| Solyc08g068610.3 | 0.005   | 0.038   | 3.29           | 0.94          | 1.1           | 0.75          | 1.18          | 0.97          | 0.48          | 19.4       | 89.75      | 189.84     | 41.66      | 78.04      | 9.92       |
| Solyc10g075110.2 | 0.001   | 0.015   | 3.29           | 0             | 0.4           | 0.4           | 0.62          | 0.24          | 1.27          | 3.45       | 2.14       | 2.5        | 6.18       | 7.61       | 22.52      |
| Solyc12g087790.1 | 0.01    | 0.058   | 3.29           | 2.47          | 3.76          | 0.71          | 1.22          | 0.93          | 1.21          | 12.31      | 164.28     | 104.73     | 60.94      | 93.22      | 15.24      |
| Solyc07g045350.3 | <0.001  | 0.004   | 3.27           | 0.98          | 1.26          | 0.99          | 2.68          | 0.7           | 2.49          | 15.66      | 15.38      | 28.97      | 14.22      | 14.31      | 24.16      |
| Solyc06g074030.1 | 0.008   | 0.049   | 3.26           | 8.28          | 5.47          | 6.31          | 6.29          | 6.31          | 5.7           | 107.88     | 313.65     | 544.68     | 114.89     | 488.71     | 30.06      |
| Solyc10g050970.1 | 0.027   | 0.104   | 3.26           | 0             | 0             | 0             | 0             | 0             | 0             | 1.02       | 38.95      | 55.14      | 19.94      | 48.64      | 7.01       |
| Solyc12g009000.1 | 0.009   | 0.055   | 3.22           | 0.45          | 0.39          | 0.5           | 0.64          | 0.31          | 0.64          | 7.53       | 60.57      | 72.23      | 24.78      | 82.42      | 6.8        |
| Solyc12g010420.1 | 0.009   | 0.053   | 3.21           | 9.44          | 4.17          | 7.89          | 14.88         | 3.35          | 16.79         | 18.63      | 154.36     | 129        | 66.29      | 131.1      | 66.67      |
| Solyc05g006220.3 | 0.005   | 0.041   | 3.18           | 5.16          | 5.69          | 4.8           | 3.16          | 8.65          | 4.02          | 11.31      | 40.49      | 15.11      | 36.51      | 38.1       | 144.47     |
| Solyc10g076250.2 | 0.016   | 0.076   | 3.17           | 1.75          | 1.37          | 1.74          | 4.8           | 3.03          | 9.24          | 4.98       | 8.3        | 5.17       | 10.75      | 13.19      | 113.23     |

| TomatoID         | p-value | q-value | DE in Infected | Control1 FPKM | Control2 FPKM | Control3 FPKM | LsoFree1 FPKM | LsoFree2 FPKM | LsoFree3 FPKM | LsoB1 FPKM | LsoB2 FPKM | LsoB3 FPKM | LsoA1 FPKM | LsoA2 FPKM | LsoA3 FPKM |
|------------------|---------|---------|----------------|---------------|---------------|---------------|---------------|---------------|---------------|------------|------------|------------|------------|------------|------------|
| Solyc08g079090.3 | 0.026   | 0.102   | 3.16           | 0.83          | 11.95         | 3.14          | 1.7           | 1.14          | 0.07          | 4          | 43.07      | 25.87      | 46.96      | 26.3       | 32.67      |
| Solyc08g074682.1 | <0.001  | 0.002   | 3.15           | 0             | 0             | 0             | 0             | 0             | 0             | 4.65       | 9.49       | 10.08      | 6.36       | 3.99       | 10.51      |
| Solyc03g124110.2 | 0.034   | 0.118   | 3.14           | 0.04          | 0.02          | 0             | 0.02          | 0.02          | 0.05          | 3.78       | 63.99      | 90.77      | 17.25      | 87.99      | 3.83       |
| Solyc04g063210.3 | 0.004   | 0.036   | 3.14           | 2.71          | 2.08          | 1.52          | 1.91          | 1.34          | 0.61          | 5.17       | 9.64       | 4.12       | 25.09      | 21.27      | 38.02      |
| Solyc08g081550.3 | 0.008   | 0.049   | 3.14           | 1.28          | 1.33          | 0             | 1.8           | 1.56          | 0             | 5.13       | 71.92      | 63.66      | 33.87      | 42.2       | 27.84      |
| Solyc08g068710.1 | 0.007   | 0.048   | 3.12           | 7.11          | 5.29          | 6.42          | 1.15          | 2.31          | 2.34          | 49.76      | 115.48     | 114.84     | 75.2       | 40.85      | 14.78      |
| Solyc01g005865.1 | 0.009   | 0.054   | 3.11           | 0.3           | 0             | 0             | 0             | 0             | 1.51          | 0          | 0.94       | 0          | 0.58       | 1.25       | 3.76       |
| Solyc01g005870.2 | 0.009   | 0.054   | 3.11           | 1.73          | 3.34          | 3.4           | 7.92          | 2.61          | 11.24         | 6.08       | 15.27      | 10.59      | 25.43      | 26.11      | 90.12      |
| Solyc01g105650.3 | 0.012   | 0.065   | 3.1            | 0             | 0             | 0             | 0             | 0             | 0             | 0.05       | 6          | 3.62       | 1.91       | 1.45       | 23.98      |
| Solyc12g009240.1 | 0.016   | 0.075   | 3.09           | 0             | 0.07          | 0.08          | 0.13          | 0.05          | 0.27          | 13.36      | 45.7       | 61.91      | 12.17      | 88.2       | 2.86       |
| Solyc01g058500.3 | 0.002   | 0.025   | 3.08           | 77.69         | 110.33        | 62.64         | 66.28         | 58.03         | 84.34         | 181.61     | 276.58     | 525.02     | 1022.17    | 968.8      | 648.58     |
| Solyc06g075690.3 | 0.031   | 0.113   | 3.08           | 6.76          | 2.22          | 2.82          | 1.08          | 2.68          | 1.34          | 6.87       | 134.77     | 173.95     | 82.63      | 57.39      | 22.15      |

| TomatoID         | p-value | q-value | DE in Infected | Control1 FPKM | Control2 FPKM | Control3 FPKM | LsoFree1 FPKM | LsoFree2 FPKM | LsoFree3 FPKM | LsoB1 FPKM | LsoB2 FPKM | LsoB3 FPKM | LsoA1 FPKM | LsoA2 FPKM | LsoA3 FPKM |
|------------------|---------|---------|----------------|---------------|---------------|---------------|---------------|---------------|---------------|------------|------------|------------|------------|------------|------------|
| Solyc06g083040.3 | 0.015   | 0.074   | 3.08           | 54.89         | 78.07         | 50.55         | 52.88         | 32.6          | 25.35         | 135.81     | 92.83      | 31.07      | 359.77     | 296.27     | 633.23     |
| Solyc07g006890.1 | 0.001   | 0.018   | 3.08           | 5.1           | 8.62          | 5.6           | 8.24          | 5.53          | 4.17          | 31.16      | 162.86     | 148.93     | 123.02     | 137.28     | 56.21      |
| Solyc06g074530.1 | 0.001   | 0.021   | 3.07           | 5.46          | 9.53          | 4.83          | 3.94          | 5.74          | 2.1           | 38.87      | 121.69     | 181.67     | 62.39      | 119.45     | 42.68      |
| Solyc12g005450.1 | 0.003   | 0.03    | 3.07           | 0             | 0             | 0.01          | 0             | 0             | 0             | 2.62       | 24.8       | 24.24      | 11.55      | 23.03      | 6.36       |
| Solyc04g074950.3 | 0.002   | 0.025   | 3.06           | 6.63          | 4.66          | 6.12          | 7.04          | 4.75          | 6.83          | 21.62      | 133.38     | 122.84     | 121.3      | 52.62      | 56.3       |
| Solyc07g048060.2 | 0.027   | 0.103   | 3.06           | 1.26          | 2.31          | 0.2           | 0             | 0.43          | 0.37          | 1.99       | 57.93      | 49.13      | 14.23      | 11.72      | 15.37      |
| Solyc08g077020.1 | 0.01    | 0.058   | 3.04           | 2.73          | 5.18          | 2.43          | 2.9           | 2.17          | 1.74          | 13.97      | 127.96     | 153.71     | 83.86      | 105.96     | 20.37      |
| Solyc01g097520.3 | 0.001   | 0.014   | 3.03           | 22.92         | 20.87         | 20.53         | 30.08         | 27.81         | 18.03         | 80.07      | 189.97     | 143.5      | 113.69     | 125.42     | 417.03     |
| Solyc03g111290.1 | 0.016   | 0.076   | 3.03           | 0             | 0.12          | 0.03          | 0.19          | 0.39          | 0.08          | 0.96       | 17.54      | 4.4        | 10.37      | 1.9        | 24.2       |
| Solyc03g119980.3 | 0.005   | 0.039   | 3.03           | 4.46          | 11.55         | 5.32          | 11.61         | 6.51          | 5.77          | 18.8       | 25.8       | 16.76      | 50.6       | 56.22      | 143.67     |

| TomatoID         | p-value | q-value | DE in Infected | Control1 FPKM | Control2 FPKM | Control3 FPKM | LsoFree1 FPKM | LsoFree2 FPKM | LsoFree3 FPKM | LsoB1 FPKM | LsoB2 FPKM | LsoB3 FPKM | LsoA1 FPKM | LsoA2 FPKM | LsoA3 FPKM |
|------------------|---------|---------|----------------|---------------|---------------|---------------|---------------|---------------|---------------|------------|------------|------------|------------|------------|------------|
| Solyc01g090180.3 | 0.034   | 0.118   | 3.02           | 5.95          | 4.83          | 4.43          | 3.45          | 2.18          | 0.69          | 5.26       | 3.84       | 1.61       | 31.43      | 23.75      | 60.72      |
| Solyc01g059990.3 | 0.015   | 0.072   | 3              | 0             | 0             | 0             | 0             | 0             | 0.01          | 46.59      | 26         | 53.49      | 16.29      | 4.29       | 3.05       |
| Solyc03g007240.3 | 0.004   | 0.034   | 3              | 11.61         | 13.33         | 8.57          | 13.82         | 15.72         | 14.33         | 34.1       | 37.55      | 29.84      | 98.53      | 71.23      | 254.29     |
| Solyc03g093080.3 | 0.032   | 0.116   | 2.99           | 0.34          | 0.59          | 0             | 0.1           | 0.2           | 0             | 2.43       | 57.56      | 66.89      | 43.89      | 54.92      | 5.37       |
| Solyc03g096290.3 | 0.007   | 0.048   | 2.99           | 73.34         | 39.12         | 64.31         | 22.49         | 30.4          | 7.67          | 97.77      | 108.5      | 115.81     | 111.02     | 87.76      | 398.95     |
| Solyc07g006570.3 | 0.02    | 0.087   | 2.99           | 2.72          | 14.6          | 7             | 17.74         | 12.38         | 9.77          | 67.88      | 40.47      | 11.71      | 77.28      | 91.98      | 187.46     |
| Solyc07g007760.3 | 0.012   | 0.064   | 2.99           | 14.39         | 20.94         | 25.61         | 4.47          | 20.73         | 3.01          | 55.16      | 164.38     | 70.27      | 224.34     | 102.2      | 122.47     |
| Solyc01g087590.3 | 0.031   | 0.112   | 2.98           | 0             | 2             | 0.19          | 0.81          | 0.75          | 0.39          | 2.12       | 80.09      | 22.76      | 56.62      | 13.93      | 19.19      |
| Solyc02g085730.3 | <0.001  | 0.014   | 2.98           | 40.46         | 51.51         | 45.83         | 52.86         | 35.1          | 38.9          | 85.86      | 186.66     | 189.87     | 215.91     | 177.04     | 614.27     |

| TomatoID         | p-value | q-value | DE in Infected | Control1 FPKM | Control2 FPKM | Control3 FPKM | LsoFree1 FPKM | LsoFree2 FPKM | LsoFree3 FPKM | LsoB1 FPKM | LsoB2 FPKM | LsoB3 FPKM | LsoA1 FPKM | LsoA2 FPKM | LsoA3 FPKM |
|------------------|---------|---------|----------------|---------------|---------------|---------------|---------------|---------------|---------------|------------|------------|------------|------------|------------|------------|
| Solyc08g006740.3 | <0.001  | 0.01    | 2.98           | 0.39          | 0.86          | 0.33          | 1.07          | 0.45          | 0.77          | 3.6        | 5.18       | 8.48       | 8.32       | 12.09      | 17.96      |
| Solyc09g056385.1 | 0.001   | 0.018   | 2.98           | 23.28         | 36.68         | 53.84         | 42.15         | 11.1          | 16.4          | 75.77      | 153.06     | 170.59     | 179.71     | 171.26     | 164.61     |
| Solyc10g078495.1 | <0.001  | 0.014   | 2.97           | 0             | 0.64          | 0.39          | 0.41          | 0             | 0             | 1.63       | 4.15       | 2.83       | 3.3        | 4.13       | 16.09      |
| Solyc01g007955.1 | 0.005   | 0.038   | 2.96           | 1.29          | 1.25          | 1.12          | 2.17          | 1             | 1.05          | 2.46       | 5.35       | 3.13       | 8.78       | 11.2       | 38.4       |
| Solyc10g080690.2 | 0.04    | 0.132   | 2.96           | 0.32          | 10.65         | 1.86          | 2.4           | 1.52          | 0.07          | 2.34       | 18.22      | 11.32      | 26.58      | 13.44      | 51.36      |
| Solyc02g090360.3 | 0.014   | 0.072   | 2.95           | 1.85          | 4.1           | 1.1           | 1.38          | 1.26          | 0.61          | 4.84       | 62.99      | 43.6       | 70.4       | 39.21      | 18.91      |
| Solyc02g080200.3 | 0.039   | 0.128   | 2.93           | 2.38          | 31.03         | 1.89          | 3.18          | 0             | 0.75          | 46.71      | 16.04      | 0          | 60.28      | 28.09      | 97.19      |
| Solyc02g080210.3 | 0.039   | 0.128   | 2.93           | 0.02          | 2.42          | 0             | 0.11          | 1.35          | 0             | 1.7        | 0.07       | 1.59       | 2.65       | 1.08       | 3.33       |
| Solyc00g272810.1 | 0.007   | 0.046   | 2.92           | 5.58          | 12.14         | 13.46         | 40.29         | 12.99         | 30.41         | 49.82      | 144.2      | 161.14     | 91.38      | 99.29      | 210.63     |
| Solyc01g007020.3 | 0.006   | 0.043   | 2.92           | 1.15          | 1.29          | 1.22          | 0.53          | 0.83          | 0.36          | 4.94       | 46.56      | 36.72      | 16.72      | 38.65      | 10.74      |
| Solyc04g074480.3 | <0.001  | 0.004   | 2.91           | 31.45         | 45.67         | 30.48         | 50.7          | 34.95         | 34.83         | 182.97     | 249.13     | 337.76     | 220.11     | 208.24     | 410.98     |
| Solyc11g071550.2 | 0.005   | 0.039   | 2.91           | 1.93          | 1.88          | 1.52          | 2.82          | 1.27          | 2.19          | 5.18       | 10.08      | 1.98       | 9.88       | 10.3       | 44.42      |
| Solyc01g091165.1 | 0.028   | 0.106   | 2.9            | 0.26          | 0             | 0             | 0.04          | 0             | 0.12          | 0.21       | 1.19       | 0.24       | 15.04      | 3.66       | 14.67      |

| TomatoID         | p-value | q-value | DE in Infected | Control1 FPKM | Control2 FPKM | Control3 FPKM | LsoFree1 FPKM | LsoFree2 FPKM | LsoFree3 FPKM | LsoB1 FPKM | LsoB2 FPKM | LsoB3 FPKM | LsoA1 FPKM | LsoA2 FPKM | LsoA3 FPKM |
|------------------|---------|---------|----------------|---------------|---------------|---------------|---------------|---------------|---------------|------------|------------|------------|------------|------------|------------|
| Solyc02g077050.3 | 0.001   | 0.017   | 2.9            | 5.89          | 11.21         | 5.47          | 4.3           | 5.68          | 1.94          | 38.04      | 89.45      | 106.55     | 52.8       | 46.16      | 49.18      |
| Solyc06g082535.1 | 0.001   | 0.02    | 2.89           | 15.29         | 26.68         | 12.55         | 18.17         | 17.64         | 14.28         | 42.83      | 76.78      | 59.94      | 101.58     | 89.48      | 268.23     |
| Solyc04g082200.2 | 0.006   | 0.045   | 2.88           | 68.92         | 67.63         | 65.4          | 98.47         | 85.7          | 123.99        | 153.62     | 735.97     | 855.28     | 278.05     | 342.58     | 1245.46    |
| Solyc07g063410.3 | 0.014   | 0.07    | 2.88           | 4.5           | 2.67          | 5.02          | 9.41          | 5.61          | 15.88         | 8.21       | 13.39      | 13.06      | 36.14      | 26.08      | 114.2      |
| Solyc02g078890.1 | 0.03    | 0.11    | 2.87           | 3.73          | 3.86          | 2.55          | 10.27         | 8.05          | 4.46          | 10.03      | 60.46      | 14.77      | 109.12     | 53.72      | 134.57     |
| Solyc08g081555.1 | 0.011   | 0.061   | 2.87           | 1.93          | 1.22          | 0.76          | 2.19          | 2.12          | 1.6           | 4.52       | 71.07      | 58.3       | 30.4       | 39.96      | 26.43      |
| Solyc10g076240.2 | 0.028   | 0.106   | 2.86           | 0             | 0             | 0.1           | 0             | 0             | 0             | 14.61      | 7.77       | 70.96      | 2.54       | 3.96       | 4.19       |
| Solyc07g056480.3 | <0.001  | 0.01    | 2.85           | 33.22         | 28.59         | 29.62         | 46.34         | 26.07         | 37.13         | 91.44      | 94.32      | 96.98      | 128.74     | 119.31     | 413.89     |
| Solyc10g084880.3 | 0.007   | 0.046   | 2.85           | 2.24          | 1.15          | 1.32          | 1.46          | 1.68          | 1.85          | 15.57      | 85.56      | 82.72      | 21.1       | 77.09      | 11.31      |
| Solyc03g118810.1 | 0.002   | 0.026   | 2.84           | 49.37         | 26.47         | 45.97         | 49.03         | 29.65         | 56.34         | 128.71     | 573.67     | 543.75     | 354.26     | 550.79     | 228.98     |
| Solyc06g034370.1 | 0.004   | 0.035   | 2.83           | 0.23          | 0.95          | 0             | 0.75          | 0.31          | 0.21          | 6.52       | 18         | 25.44      | 11.89      | 2.74       | 13.02      |
| Solyc02g080120.2 | 0.002   | 0.027   | 2.82           | 0.52          | 0.65          | 1.52          | 0.6           | 0.59          | 1.47          | 1.4        | 5.05       | 4.22       | 1.83       | 4.25       | 23.42      |

| TomatoID         | p-value | q-value | DE in Infected | Control1 FPKM | Control2 FPKM | Control3 FPKM | LsoFree1 FPKM | LsoFree2 FPKM | LsoFree3 FPKM | LsoB1 FPKM | LsoB2 FPKM | LsoB3 FPKM | LsoA1 FPKM | LsoA2 FPKM | LsoA3 FPKM |
|------------------|---------|---------|----------------|---------------|---------------|---------------|---------------|---------------|---------------|------------|------------|------------|------------|------------|------------|
| Solyc10g085190.2 | 0.012   | 0.065   | 2.82           | 0             | 0             | 0             | 0.05          | 0             | 0             | 0.39       | 1.8        | 1.44       | 0.24       | 0.47       | 21.09      |
| Solyc03g093360.3 | 0.033   | 0.116   | 2.81           | 0.43          | 15.45         | 2.14          | 8.78          | 4.95          | 1.12          | 30.97      | 66.38      | 15.32      | 95.87      | 74.43      | 61.44      |
| Solyc03g117600.3 | 0.001   | 0.018   | 2.81           | 4.01          | 7.13          | 4.52          | 7.17          | 5.66          | 5.38          | 18.88      | 20.04      | 14.79      | 30.11      | 26.99      | 89.51      |
| Solyc09g083360.3 | 0.006   | 0.042   | 2.81           | 0.55          | 0.25          | 0.38          | 0.48          | 0.72          | 0.71          | 1.96       | 22.59      | 12.11      | 20.08      | 7.58       | 15.29      |
| Solyc10g080370.1 | 0.003   | 0.032   | 2.81           | 26.18         | 48.42         | 47.64         | 39.57         | 23.81         | 16.74         | 117.18     | 412.73     | 479.79     | 464.22     | 412.84     | 174.24     |
| Solyc01g057770.3 | 0.016   | 0.077   | 2.8            | 1.1           | 2.5           | 1.67          | 1.11          | 1.56          | 0.54          | 5.25       | 76.36      | 66         | 60.05      | 32.09      | 14.19      |
| Solyc09g008060.3 | <0.001  | 0.011   | 2.8            | 1.45          | 3.99          | 2.11          | 1.97          | 1.17          | 1.14          | 5.63       | 8.36       | 10.13      | 10.26      | 11.64      | 27.24      |
| Solyc09g066360.1 | <0.001  | 0.013   | 2.8            | 0             | 0             | 0             | 0.62          | 0.1           | 0.37          | 6.34       | 4.74       | 13.88      | 3.73       | 3.3        | 9.31       |
| Solyc04g071770.3 | 0.01    | 0.058   | 2.79           | 0.05          | 0.07          | 0.13          | 0.4           | 0             | 0.62          | 0.61       | 3.24       | 6.59       | 0.66       | 1.56       | 17.19      |
| Solyc06g072460.1 | 0.006   | 0.044   | 2.78           | 2.33          | 1.31          | 1.93          | 2.01          | 1.62          | 1.48          | 10.16      | 64.49      | 85.27      | 19.89      | 18.3       | 17.26      |
| Solyc10g054440.2 | 0.001   | 0.019   | 2.78           | 30.1          | 43.68         | 21.55         | 32.4          | 41.59         | 43.96         | 109.93     | 442.16     | 449.42     | 268.18     | 262.05     | 367.54     |

| TomatoID         | p-value | q-value | DE in Infected | Control1 FPKM | Control2 FPKM | Control3 FPKM | LsoFree1 FPKM | LsoFree2 FPKM | LsoFree3 FPKM | LsoB1 FPKM | LsoB2 FPKM | LsoB3 FPKM | LsoA1 FPKM | LsoA2 FPKM | LsoA3 FPKM |
|------------------|---------|---------|----------------|---------------|---------------|---------------|---------------|---------------|---------------|------------|------------|------------|------------|------------|------------|
| Solyc01g079200.3 | 0.043   | 0.137   | 2.77           | 0.43          | 0.51          | 0.25          | 0.51          | 0.14          | 0.29          | 1.2        | 59.22      | 40.15      | 35.82      | 14.91      | 7.78       |
| Solyc03g093610.1 | <0.001  | 0.011   | 2.77           | 3.13          | 5.11          | 4.02          | 4.32          | 3.79          | 2.5           | 34.18      | 65.24      | 94.5       | 27.72      | 44.05      | 28.55      |
| Solyc04g079360.1 | 0.001   | 0.02    | 2.77           | 0.26          | 0.36          | 0.75          | 0.79          | 1.06          | 0.48          | 5.79       | 29.59      | 31.51      | 16.38      | 30.14      | 9.79       |
| Solyc09g091600.3 | 0.003   | 0.029   | 2.77           | 1.7           | 3.59          | 2.47          | 4.42          | 4.15          | 0.26          | 28.48      | 37.15      | 78.53      | 28.98      | 18.73      | 36.19      |
| Solyc02g089685.1 | <0.001  | <0.001  | 2.76           | 0             | 0             | 0             | 0             | 0             | 0             | 4.93       | 8.36       | 8.55       | 6.86       | 7.68       | 5.37       |
| Solyc00g011160.2 | 0.003   | 0.032   | 2.74           | 63.64         | 91.32         | 58.44         | 55.8          | 45.36         | 55.65         | 116.69     | 177.94     | 306.97     | 620.66     | 605.21     | 408.49     |
| Solyc12g005640.2 | 0.002   | 0.026   | 2.74           | 0.25          | 0             | 0.21          | 0             | 0.34          | 0.66          | 0.96       | 2.76       | 3.26       | 6.02       | 2.58       | 14.12      |
| Solyc12g042073.1 | <0.001  | <0.001  | 2.74           | 0             | 0             | 0             | 0.05          | 0             | 0             | 6.52       | 5.17       | 5.25       | 5.63       | 8.48       | 5.18       |
| Solyc06g083440.3 | 0.002   | 0.026   | 2.73           | 3             | 9.91          | 4.51          | 5.27          | 3.87          | 1.62          | 15.32      | 18.51      | 17.69      | 30.48      | 20.24      | 57.48      |
| Solyc08g008280.3 | 0.037   | 0.126   | 2.73           | 5.35          | 3.65          | 3.64          | 2.05          | 2.73          | 2.13          | 18.64      | 170.04     | 276.32     | 130.43     | 71.1       | 12.16      |
| Solyc10g075100.2 | 0.042   | 0.135   | 2.73           | 81.6          | 378.41        | 48.51         | 36.45         | 222.82        | 33.92         | 865.57     | 340.43     | 842.77     | 812.35     | 293.8      | 1316.9     |

| TomatoID         | p-value | q-value | DE in Infected | Control1 FPKM | Control2 FPKM | Control3 FPKM | LsoFree1 FPKM | LsoFree2 FPKM | LsoFree3 FPKM | LsoB1 FPKM | LsoB2 FPKM | LsoB3 FPKM | LsoA1 FPKM | LsoA2 FPKM | LsoA3 FPKM |
|------------------|---------|---------|----------------|---------------|---------------|---------------|---------------|---------------|---------------|------------|------------|------------|------------|------------|------------|
| Solyc07g008560.3 | 0.001   | 0.02    | 2.72           | 10.68         | 4.86          | 6.84          | 18.15         | 5.05          | 21.38         | 57.11      | 49.38      | 42.3       | 66.48      | 48.45      | 61.02      |
| Solyc01g098910.3 | 0.003   | 0.032   | 2.71           | 1.57          | 2.34          | 1.48          | 1.98          | 2.72          | 2.63          | 6.97       | 48.16      | 46.57      | 33.76      | 19.64      | 27.12      |
| Solyc04g054990.3 | 0.024   | 0.097   | 2.71           | 3.84          | 9.37          | 4.87          | 18.19         | 8.24          | 5.76          | 22.42      | 18.79      | 12.79      | 77.53      | 63.42      | 130.46     |
| Solyc09g089500.3 | 0.024   | 0.097   | 2.71           | 0             | 0             | 0             | 0             | 0.14          | 0             | 0          | 0          | 0          | 0.15       | 2.51       | 19.79      |
| Solyc03g080190.3 | 0.005   | 0.04    | 2.7            | 17.76         | 14.62         | 14.26         | 6.43          | 16.95         | 5.33          | 92.16      | 137.01     | 235.39     | 79.18      | 40.6       | 91.56      |
| Solyc05g050800.3 | <0.001  | 0.007   | 2.7            | 24.55         | 25.13         | 23.08         | 20.41         | 30.81         | 17.73         | 157.22     | 307.16     | 427.89     | 214.1      | 140.16     | 175.86     |
| Solyc02g091180.1 | 0.021   | 0.089   | 2.69           | 0.26          | 0.14          | 0             | 0.58          | 0.16          | 0.47          | 6.76       | 35.66      | 41.84      | 10.57      | 68.12      | 3.52       |
| Solyc07g042230.1 | 0.026   | 0.101   | 2.69           | 0             | 0             | 0             | 0             | 0             | 0             | 0.16       | 21.52      | 10         | 9.78       | 5.08       | 8.85       |
| Solyc12g011030.2 | 0.015   | 0.074   | 2.69           | 0.04          | 1.52          | 0.24          | 0.08          | 0.17          | 0             | 1.63       | 26.4       | 8.68       | 22.17      | 15.11      | 7.52       |
| Solyc03g117270.1 | 0.005   | 0.039   | 2.68           | 6.81          | 9.32          | 5.59          | 14.3          | 6.79          | 13.9          | 24.18      | 35.53      | 14.93      | 63.55      | 49.15      | 105.83     |
| Solyc04g009440.3 | 0.003   | 0.028   | 2.68           | 6.14          | 6.69          | 4.24          | 9.33          | 7.69          | 5.11          | 27.45      | 143.52     | 138.5      | 105.3      | 41.48      | 68.38      |

| TomatoID         | p-value | q-value | DE in Infected | Control1 FPKM | Control2 FPKM | Control3 FPKM | LsoFree1 FPKM | LsoFree2 FPKM | LsoFree3 FPKM | LsoB1 FPKM | LsoB2 FPKM | LsoB3 FPKM | LsoA1 FPKM | LsoA2 FPKM | LsoA3 FPKM |
|------------------|---------|---------|----------------|---------------|---------------|---------------|---------------|---------------|---------------|------------|------------|------------|------------|------------|------------|
| Solyc02g064680.3 | 0.009   | 0.056   | 2.67           | 7.73          | 7.85          | 6.82          | 9.51          | 9.15          | 8             | 25.09      | 251.64     | 219.26     | 203.96     | 91.73      | 61.42      |
| Solyc05g009470.3 | 0.025   | 0.099   | 2.67           | 4.86          | 27.96         | 6.85          | 16.78         | 4.51          | 11.56         | 28.08      | 15.47      | 9.16       | 58.26      | 63.64      | 88.62      |
| Solyc06g074420.1 | 0.042   | 0.135   | 2.67           | 0.09          | 1.45          | 0.13          | 1.14          | 8.96          | 0.52          | 6.26       | 25.6       | 30.87      | 14.02      | 11.52      | 73.79      |
| Solyc11g027760.1 | 0.004   | 0.037   | 2.67           | 36.06         | 61.62         | 35.94         | 36.11         | 29.99         | 45.69         | 81.05      | 105.82     | 210.76     | 437.15     | 380.93     | 245.19     |
| Solyc01g109710.3 | <0.001  | 0.014   | 2.66           | 13.23         | 9.98          | 11.94         | 20.71         | 17.54         | 18.28         | 52.25      | 133.93     | 149.67     | 95.31      | 81.36      | 157.82     |
| Solyc03g122190.3 | 0.004   | 0.037   | 2.66           | 12.96         | 12.39         | 11.99         | 17.08         | 15.12         | 16.9          | 22.88      | 122.65     | 74.9       | 128.4      | 97.76      | 163.9      |
| Solyc01g087020.2 | 0.006   | 0.042   | 2.65           | 8.66          | 4.72          | 8.49          | 4.6           | 4.43          | 6.93          | 13.26      | 85.48      | 77.56      | 58.95      | 61.43      | 32.29      |
| Solyc03g123620.4 | 0.026   | 0.101   | 2.65           | 3.33          | 2.28          | 1.42          | 1.6           | 0.87          | 1.16          | 2.58       | 36.72      | 37.73      | 36.41      | 35.45      | 13.28      |
| Solyc10g081570.2 | 0.043   | 0.138   | 2.65           | 20.82         | 14.35         | 18.69         | 27.55         | 27.08         | 25.41         | 19.35      | 326.66     | 357.54     | 142.75     | 103.18     | 319.51     |
| Solyc08g007840.2 | 0.014   | 0.069   | 2.64           | 0             | 0.09          | 0             | 0             | 0             | 0             | 0.06       | 9.09       | 5.8        | 3.3        | 3.42       | 10.97      |
| Solyc02g080190.3 | 0.03    | 0.11    | 2.63           | 0.44          | 7.41          | 0.47          | 1.19          | 0.93          | 0.29          | 9.74       | 4.03       | 1.72       | 16.61      | 7.04       | 21.3       |

| TomatoID         | p-value | q-value | DE in Infected | Control1 FPKM | Control2 FPKM | Control3 FPKM | LsoFree1 FPKM | LsoFree2 FPKM | LsoFree3 FPKM | LsoB1 FPKM | LsoB2 FPKM | LsoB3 FPKM | LsoA1 FPKM | LsoA2 FPKM | LsoA3 FPKM |
|------------------|---------|---------|----------------|---------------|---------------|---------------|---------------|---------------|---------------|------------|------------|------------|------------|------------|------------|
| Solyc09g018250.2 | <0.001  | <0.001  | 2.63           | 0             | 0             | 0             | 0             | 0             | 0             | 4.26       | 5.34       | 5.87       | 4.93       | 5.78       | 5.33       |
| Solyc03g026270.3 | 0.046   | 0.142   | 2.62           | 0             | 0             | 0             | 0             | 0             | 0             | 1.64       | 23.68      | 55.1       | 21.84      | 32.38      | 2.68       |
| Solyc12g099000.2 | 0.003   | 0.03    | 2.62           | 42.41         | 44.96         | 36.45         | 72.86         | 52.75         | 40.61         | 101.5      | 247.83     | 262.32     | 201.04     | 180.79     | 666.12     |
| Solyc06g007120.3 | 0.001   | 0.019   | 2.61           | 2.56          | 4.73          | 2.52          | 4.05          | 3.43          | 2.93          | 11.58      | 13.38      | 15.35      | 10.68      | 10.36      | 52.92      |
| Solyc02g071610.3 | 0.005   | 0.039   | 2.6            | 10.5          | 35.23         | 15.26         | 31.93         | 9.7           | 15.43         | 34.55      | 79.55      | 49.51      | 90.78      | 74.03      | 168.29     |
| Solyc02g071720.2 | 0.01    | 0.06    | 2.6            | 0.36          | 0.3           | 0.47          | 0.68          | 0.33          | 0.21          | 0.88       | 1.48       | 0.47       | 4.61       | 4.2        | 17.18      |
| Solyc04g082030.1 | 0.022   | 0.092   | 2.6            | 17.67         | 25.59         | 21.92         | 7.89          | 15.61         | 10.2          | 13.58      | 13.24      | 10.7       | 39.73      | 48.81      | 205.12     |
| Solyc02g067610.1 | 0.014   | 0.072   | 2.59           | 2.85          | 1.07          | 0.97          | 0.9           | 1.49          | 1             | 6.52       | 69.12      | 62.17      | 39.4       | 29.34      | 10.19      |
| Solyc07g005330.3 | 0.01    | 0.058   | 2.59           | 17.75         | 30.74         | 15.56         | 21.84         | 26.23         | 16.84         | 33.48      | 244.47     | 177.36     | 164.3      | 115.76     | 268.48     |
| Solyc09g062970.1 | 0.02    | 0.086   | 2.59           | 0             | 3.1           | 0.1           | 0             | 0.18          | 0             | 2.06       | 1.87       | 0.82       | 2.78       | 0.57       | 17.65      |
| Solyc02g085495.1 | <0.001  | <0.001  | 2.58           | 0             | 0             | 0             | 0             | 0             | 0             | 4.4        | 4.12       | 4.08       | 4.76       | 5.8        | 5.06       |

| TomatoID         | p-value | q-value | DE in Infected | Control1 FPKM | Control2 FPKM | Control3 FPKM | LsoFree1 FPKM | LsoFree2 FPKM | LsoFree3 FPKM | LsoB1 FPKM | LsoB2 FPKM | LsoB3 FPKM | LsoA1 FPKM | LsoA2 FPKM | LsoA3 FPKM |
|------------------|---------|---------|----------------|---------------|---------------|---------------|---------------|---------------|---------------|------------|------------|------------|------------|------------|------------|
| Solyc01g080010.2 | 0.001   | 0.015   | 2.57           | 1.15          | 2.58          | 1.21          | 2.05          | 1.16          | 0.78          | 4.96       | 12.66      | 8.96       | 12.03      | 10.89      | 21.43      |
| Solyc04g011790.1 | <0.001  | 0.004   | 2.57           | 0.2           | 0             | 0             | 0.35          | 0             | 0.66          | 3.36       | 3.91       | 4.47       | 6.42       | 3.07       | 7.31       |
| Solyc09g006010.2 | 0.026   | 0.101   | 2.57           | 0.17          | 3.88          | 0.35          | 1.77          | 2.41          | 0.19          | 5.28       | 11.19      | 3.42       | 13.94      | 12.04      | 36.93      |
| Solyc10g083970.1 | 0.001   | 0.016   | 2.57           | 33.98         | 70.01         | 48.67         | 35.97         | 35.2          | 25.82         | 133.01     | 399.54     | 324.96     | 320.41     | 318.42     | 227.98     |
| Solyc12g008350.2 | 0.003   | 0.031   | 2.57           | 0.44          | 3.69          | 2.38          | 1.14          | 2.19          | 0.82          | 6.83       | 32.18      | 19.56      | 21.54      | 22.01      | 17.38      |
| Solyc03g007230.3 | 0.008   | 0.051   | 2.56           | 1.83          | 2.54          | 2.38          | 4.37          | 2.89          | 12.3          | 6.56       | 8.01       | 9.66       | 16.6       | 14.92      | 43.51      |
| Solyc01g091360.3 | 0.001   | 0.019   | 2.55           | 1.26          | 1.54          | 1.18          | 0.11          | 0.22          | 0.2           | 1.45       | 4.17       | 2.3        | 4.58       | 3.82       | 11.81      |
| Solyc12g057150.1 | 0.03    | 0.111   | 2.55           | 1.17          | 4.62          | 2.53          | 1.31          | 4.17          | 0.32          | 8.32       | 96.59      | 102.89     | 43.78      | 79.29      | 17.27      |
| Solyc02g083850.3 | 0.003   | 0.032   | 2.54           | 1.57          | 0.72          | 0.71          | 0.78          | 1.32          | 0.53          | 4.03       | 16.6       | 15.9       | 8.44       | 4.51       | 18.33      |
| Solyc07g008380.2 | 0.038   | 0.127   | 2.54           | 0             | 0.57          | 0             | 0.03          | 0.05          | 0             | 0.66       | 0.3        | 0.05       | 11.99      | 3.01       | 10.2       |

| TomatoID         | p-value | q-value | DE in Infected | Control1 FPKM | Control2 FPKM | Control3 FPKM | LsoFree1 FPKM | LsoFree2 FPKM | LsoFree3 FPKM | LsoB1 FPKM | LsoB2 FPKM | LsoB3 FPKM | LsoA1 FPKM | LsoA2 FPKM | LsoA3 FPKM |
|------------------|---------|---------|----------------|---------------|---------------|---------------|---------------|---------------|---------------|------------|------------|------------|------------|------------|------------|
| Solyc00g009760.2 | 0.004   | 0.037   | 2.53           | 9.18          | 11.2          | 8.18          | 8.79          | 6.89          | 8.42          | 15.74      | 25.34      | 39.66      | 85.56      | 87.51      | 58.84      |
| Solyc02g064980.1 | 0.01    | 0.057   | 2.53           | 0.18          | 0.31          | 0.12          | 0.35          | 0.54          | 0.28          | 1.51       | 24.05      | 12.41      | 17.64      | 13.54      | 8.56       |
| Solyc06g075010.3 | 0.003   | 0.031   | 2.53           | 5.56          | 7.22          | 5.94          | 11.29         | 5.77          | 7.29          | 18.62      | 15.62      | 13.74      | 43.99      | 42.51      | 69.62      |
| Solyc10g086690.2 | 0.019   | 0.084   | 2.53           | 0             | 0.17          | 0.14          | 0.38          | 0.95          | 0.13          | 0.96       | 14.45      | 11.27      | 4.16       | 4.01       | 17.21      |
| Solyc05g008370.1 | 0.002   | 0.025   | 2.52           | 37.85         | 40.6          | 45.19         | 24.59         | 29.13         | 30.03         | 49.63      | 122.28     | 77.23      | 214.14     | 143.14     | 252.06     |
| Solyc06g024210.2 | 0.005   | 0.041   | 2.52           | 23.27         | 30.5          | 21.56         | 21.63         | 18.15         | 28.6          | 39.8       | 54.34      | 107.77     | 208.3      | 210.79     | 138.7      |
| Solyc04g016190.1 | 0.01    | 0.059   | 2.51           | 0.14          | 0.53          | 0             | 0.71          | 0.14          | 0.81          | 0.78       | 1.06       | 0.82       | 2.1        | 1.39       | 18.62      |
| Solyc07g008550.3 | 0.001   | 0.022   | 2.51           | 1.93          | 0.34          | 1.35          | 2.54          | 0.15          | 4.25          | 5.59       | 5.31       | 4.43       | 9.57       | 6.99       | 10.52      |
| Solyc03g031620.3 | 0.007   | 0.047   | 2.5            | 0.46          | 2.72          | 2.1           | 2.89          | 2.18          | 0             | 6.26       | 8.68       | 15.01      | 15.82      | 11.43      | 24.91      |
| Solyc06g068650.3 | 0.007   | 0.047   | 2.5            | 13.34         | 23.73         | 14.04         | 22.09         | 23.28         | 15.9          | 37.76      | 62.57      | 37.97      | 97.21      | 80.41      | 257.41     |
| Solyc09g075890.3 | 0.01    | 0.059   | 2.5            | 4.18          | 4.09          | 3.65          | 11.75         | 6.61          | 11.38         | 12.29      | 37.28      | 31.24      | 68.11      | 47.12      | 71.54      |

| TomatoID         | p-value | q-value | DE in Infected | Control1 FPKM | Control2 FPKM | Control3 FPKM | LsoFree1 FPKM | LsoFree2 FPKM | LsoFree3 FPKM | LsoB1 FPKM | LsoB2 FPKM | LsoB3 FPKM | LsoA1 FPKM | LsoA2 FPKM | LsoA3 FPKM |
|------------------|---------|---------|----------------|---------------|---------------|---------------|---------------|---------------|---------------|------------|------------|------------|------------|------------|------------|
| Solyc10g079350.2 | 0.05    | 0.15    | 2.5            | 0.44          | 4.57          | 1.09          | 0.7           | 0.49          | 0.43          | 1.21       | 0.83       | 0.51       | 12.23      | 7.72       | 17.05      |
| Solyc04g074470.1 | 0.001   | 0.017   | 2.49           | 0.38          | 2.12          | 1.03          | 0.36          | 1.24          | 0.42          | 4.94       | 16.61      | 15.02      | 12.39      | 9.42       | 11.51      |
| Solyc08g062330.3 | 0.001   | 0.016   | 2.49           | 3.26          | 3.07          | 1.75          | 1.32          | 3.61          | 1.36          | 20.97      | 32.73      | 65.08      | 27.51      | 20.08      | 17.22      |
| Solyc12g099400.2 | 0.016   | 0.076   | 2.49           | 20.42         | 12.67         | 15.44         | 14.87         | 19.33         | 16.92         | 15.61      | 41.54      | 27.19      | 36.17      | 35         | 277.21     |
| Solyc01g105890.3 | 0.029   | 0.107   | 2.48           | 0.09          | 2.94          | 0.41          | 0.75          | 1.42          | 0             | 3.6        | 10.71      | 1.4        | 6.96       | 5.67       | 25.06      |
| Solyc06g068960.1 | 0.01    | 0.057   | 2.48           | 42.95         | 43.26         | 41.27         | 25.25         | 42.44         | 23.99         | 63.74      | 357.4      | 258.72     | 105.52     | 118.02     | 348.09     |
| Solyc08g068680.3 | 0.022   | 0.091   | 2.48           | 1.61          | 1.88          | 0.72          | 0.8           | 1.05          | 0.33          | 20.41      | 66.92      | 131.53     | 35.7       | 28.16      | 4.67       |
| Solyc02g032860.3 | 0.005   | 0.038   | 2.47           | 3.19          | 6.75          | 4.74          | 7.46          | 6.35          | 1.52          | 30.36      | 42.62      | 92.06      | 29.85      | 21.08      | 47.72      |
| Solyc02g070040.1 | 0.002   | 0.026   | 2.47           | 0.85          | 2.28          | 0.9           | 1.49          | 1.42          | 0.76          | 7.16       | 21.63      | 19.58      | 26.95      | 40.77      | 10.57      |
| Solyc03g083680.1 | 0.023   | 0.093   | 2.47           | 0.18          | 0.18          | 1.27          | 0.39          | 0.1           | 0             | 5.18       | 35.79      | 37.58      | 20.35      | 17.25      | 2.61       |
| Solyc05g010420.2 | 0.001   | 0.017   | 2.47           | 459.02        | 504.02        | 349.54        | 321.05        | 568.72        | 332.47        | 1494.47    | 1341.7     | 1168.55    | 2990.31    | 2233.17    | 3503.66    |
| Solyc12g097000.2 | 0.003   | 0.032   | 2.46           | 2.45          | 1.19          | 0.9           | 0.68          | 2.46          | 0.38          | 16.63      | 28.15      | 59.13      | 17.34      | 11.75      | 11.6       |

| TomatoID         | p-value | q-value | DE in Infected | Control1 FPKM | Control2 FPKM | Control3 FPKM | LsoFree1 FPKM | LsoFree2 FPKM | LsoFree3 FPKM | LsoB1 FPKM | LsoB2 FPKM | LsoB3 FPKM | LsoA1 FPKM | LsoA2 FPKM | LsoA3 FPKM |
|------------------|---------|---------|----------------|---------------|---------------|---------------|---------------|---------------|---------------|------------|------------|------------|------------|------------|------------|
| Solyc00g028960.1 | 0.04    | 0.131   | 2.45           | 0.3           | 0.22          | 0.2           | 5.17          | 0             | 6.63          | 2.8        | 4.54       | 4.28       | 9.5        | 10.1       | 12.83      |
| Solyc02g077110.3 | 0.005   | 0.039   | 2.45           | 2.85          | 2.98          | 3.7           | 2.29          | 1.85          | 1.9           | 3.85       | 13.18      | 17.09      | 4.35       | 7.31       | 29.47      |
| Solyc03g111100.1 | 0.008   | 0.05    | 2.45           | 0.07          | 0.69          | 0.07          | 1.27          | 1.21          | 2.43          | 7.06       | 29.21      | 36.65      | 14.32      | 34.39      | 8.51       |
| Solyc04g008330.1 | 0.006   | 0.042   | 2.45           | 0.05          | 0.41          | 0.38          | 0.37          | 0.09          | 0.09          | 1.11       | 3          | 0.36       | 1.62       | 4.05       | 11.34      |
| Solyc06g082440.1 | 0.005   | 0.039   | 2.45           | 0.86          | 1.5           | 0.72          | 1.28          | 1.23          | 0.7           | 3.38       | 23.11      | 27.03      | 14.68      | 19.16      | 12.83      |
| Solyc08g074683.1 | 0.012   | 0.064   | 2.45           | 0             | 0.26          | 0             | 0.03          | 0             | 0             | 0.73       | 1.59       | 0.34       | 6.57       | 1.2        | 10.12      |
| Solyc03g098720.3 | 0.019   | 0.083   | 2.43           | 0             | 0             | 0             | 0             | 0             | 0             | 0.15       | 0.37       | 0          | 0          | 0.35       | 15.11      |
| Solyc03g120660.3 | 0.003   | 0.034   | 2.43           | 0.66          | 1.84          | 0.81          | 0.55          | 0.85          | 0.56          | 6.48       | 1.43       | 1.97       | 8.38       | 5.01       | 12.21      |
| Solyc07g018010.3 | <0.001  | 0.011   | 2.43           | 16.7          | 13.21         | 16.83         | 9.97          | 10.56         | 9.63          | 24.28      | 39.81      | 65.12      | 43.58      | 37.63      | 88.75      |
| Solyc07g062700.3 | 0.006   | 0.043   | 2.43           | 56.12         | 49.24         | 50.22         | 73.44         | 46.77         | 89.57         | 80.32      | 398.18     | 359.67     | 218.87     | 222.39     | 482.93     |
| Solyc08g068770.2 | 0.032   | 0.115   | 2.43           | 23.99         | 19.51         | 24.25         | 8.01          | 23.43         | 14.01         | 76.66      | 453.89     | 695.99     | 247.52     | 290.84     | 55.77      |
| Solyc08g080585.1 | 0.048   | 0.147   | 2.43           | 0             | 1.83          | 0.5           | 0.92          | 2.41          | 0             | 45.65      | 74.28      | 50.81      | 13.84      | 5.24       | 14.52      |

| TomatoID         | p-value | q-value | DE in Infected | Control1 FPKM | Control2 FPKM | Control3 FPKM | LsoFree1 FPKM | LsoFree2 FPKM | LsoFree3 FPKM | LsoB1 FPKM | LsoB2 FPKM | LsoB3 FPKM | LsoA1 FPKM | LsoA2 FPKM | LsoA3 FPKM |
|------------------|---------|---------|----------------|---------------|---------------|---------------|---------------|---------------|---------------|------------|------------|------------|------------|------------|------------|
| Solyc08g080590.3 | 0.048   | 0.147   | 2.43           | 7.32          | 0             | 0             | 0             | 0             | 0             | 0          | 0          | 0          | 0          | 0          | 0          |
| Solyc12g099260.2 | 0.016   | 0.075   | 2.43           | 2.22          | 13.55         | 3.99          | 7.45          | 4.28          | 2.42          | 13.5       | 16.98      | 10.83      | 34.98      | 35.85      | 51.5       |
| Solyc02g089900.1 | 0.008   | 0.051   | 2.42           | 8.56          | 5.26          | 5.58          | 4.5           | 6.02          | 3.38          | 22.36      | 123.09     | 130.59     | 96.1       | 75.11      | 25.14      |
| Solyc02g093250.3 | 0.013   | 0.068   | 2.42           | 2.25          | 2.83          | 1.64          | 0.69          | 1.43          | 0.89          | 9.23       | 53.34      | 55.45      | 32.6       | 28.19      | 7.51       |
| Solyc04g076307.1 | <0.001  | 0.014   | 2.42           | 3.77          | 1.88          | 3.71          | 4.04          | 0             | 4.03          | 5.41       | 3.44       | 2.28       | 5.54       | 4.01       | 14         |
| Solyc06g062920.3 | 0.027   | 0.103   | 2.42           | 0.56          | 0.34          | 0.3           | 0.21          | 0.22          | 0.05          | 5.42       | 30.84      | 59.06      | 12.59      | 24.42      | 2.7        |
| Solyc01g096430.3 | <0.001  | 0.01    | 2.41           | 8.68          | 5.14          | 5.76          | 9.06          | 5.12          | 6.25          | 17.27      | 24.24      | 23.26      | 40.76      | 31.17      | 50.49      |
| Solyc04g011840.1 | 0.002   | 0.027   | 2.41           | 0.36          | 0.24          | 0.1           | 2.58          | 0.64          | 2.27          | 6.17       | 7.3        | 9.31       | 13.75      | 8.31       | 11.69      |
| Solyc10g075160.1 | 0.028   | 0.106   | 2.41           | 196.8         | 392.64        | 255.43        | 161.72        | 173.96        | 89.1          | 601.88     | 364.36     | 122.13     | 1004.21    | 587.41     | 1535.54    |
| Solyc03g007960.3 | 0.003   | 0.029   | 2.4            | 1.08          | 1.12          | 0.85          | 1.56          | 1.97          | 2.06          | 3.81       | 15.36      | 14.82      | 11.64      | 8.26       | 21.71      |

| TomatoID         | p-value | q-value | DE in Infected | Control1 FPKM | Control2 FPKM | Control3 FPKM | LsoFree1 FPKM | LsoFree2 FPKM | LsoFree3 FPKM | LsoB1 FPKM | LsoB2 FPKM | LsoB3 FPKM | LsoA1 FPKM | LsoA2 FPKM | LsoA3 FPKM |
|------------------|---------|---------|----------------|---------------|---------------|---------------|---------------|---------------|---------------|------------|------------|------------|------------|------------|------------|
| Solyc06g075000.3 | 0.002   | 0.026   | 2.39           | 1.36          | 1.5           | 1.9           | 2.33          | 1.71          | 1.89          | 5.06       | 4.3        | 3.67       | 9.91       | 13.58      | 20.81      |
| Solyc10g006700.1 | 0.029   | 0.109   | 2.39           | 14.55         | 8.14          | 13.08         | 11.91         | 17.58         | 9.96          | 139.82     | 298.07     | 694.63     | 124        | 510.18     | 33.21      |
| Solyc12g088190.2 | <0.001  | 0.009   | 2.39           | 1.14          | 2.64          | 1.32          | 1.3           | 0.93          | 1.43          | 9.12       | 5.3        | 8.51       | 4.51       | 4.15       | 14.62      |
| Solyc05g056170.3 | <0.001  | 0.013   | 2.38           | 5.36          | 5.34          | 2.07          | 4.05          | 3.55          | 3.01          | 14.5       | 12.47      | 20.8       | 21.48      | 15.59      | 35.26      |
| Solyc09g007260.3 | 0.007   | 0.047   | 2.37           | 4.22          | 4.62          | 4.54          | 8.75          | 2.71          | 4.81          | 7.69       | 10.01      | 5.44       | 16.59      | 24.79      | 44.59      |
| Solyc01g079940.3 | 0.031   | 0.113   | 2.36           | 3.06          | 5             | 3.74          | 10.32         | 2.91          | 5.43          | 5.25       | 60.66      | 41.25      | 53.13      | 41.02      | 37.5       |
| Solyc01g086800.3 | 0.001   | 0.021   | 2.36           | 1.88          | 3.55          | 1.9           | 2.41          | 1.32          | 1.18          | 13.41      | 9.49       | 25.96      | 29.81      | 12.94      | 11.24      |
| Solyc01g087570.2 | 0.005   | 0.039   | 2.36           | 6.36          | 13.48         | 7.54          | 3.68          | 5.45          | 3.05          | 13.32      | 33.41      | 29.09      | 49.19      | 45.47      | 35.06      |
| Solyc03g117870.3 | 0.004   | 0.037   | 2.36           | 49.23         | 66.31         | 60.46         | 48.2          | 69.32         | 40.7          | 87.95      | 155.13     | 120.14     | 239.21     | 194.63     | 566.38     |
| Solyc08g076980.3 | 0.037   | 0.124   | 2.36           | 0             | 0             | 0             | 0             | 0             | 0             | 0          | 2.39       | 0          | 0          | 4.64       | 10.57      |
| Solyc02g071620.3 | 0.009   | 0.055   | 2.35           | 9.85          | 7.62          | 6.97          | 8.29          | 7.92          | 8.35          | 11.59      | 84.19      | 52.84      | 40.22      | 29.38      | 76.04      |
| Solyc03g005470.3 | 0.001   | 0.015   | 2.35           | 17.15         | 33.27         | 22.57         | 29.29         | 19.95         | 22.39         | 134.17     | 131.4      | 292.43     | 108.89     | 99.43      | 118.02     |
| Solyc12g009925.1 | 0.008   | 0.05    | 2.35           | 2.52          | 7.99          | 3.99          | 7.08          | 4.69          | 1.45          | 20.88      | 28.12      | 10.34      | 23.83      | 38.21      | 41.66      |

| TomatoID         | p-value | q-value | DE in Infected | Control1 FPKM | Control2 FPKM | Control3 FPKM | LsoFree1 FPKM | LsoFree2 FPKM | LsoFree3 FPKM | LsoB1 FPKM | LsoB2 FPKM | LsoB3 FPKM | LsoA1 FPKM | LsoA2 FPKM | LsoA3 FPKM |
|------------------|---------|---------|----------------|---------------|---------------|---------------|---------------|---------------|---------------|------------|------------|------------|------------|------------|------------|
| Solyc03g112880.1 | 0.008   | 0.052   | 2.33           | 1.06          | 2.76          | 0.73          | 1.61          | 1.41          | 1.13          | 3.42       | 3.49       | 2.8        | 9.23       | 9.62       | 21.41      |
| Solyc07g006480.3 | 0.018   | 0.081   | 2.33           | 4.67          | 2.67          | 2.3           | 0.98          | 3.72          | 0.33          | 17.21      | 65.46      | 94         | 34.21      | 25.02      | 12.09      |
| Solyc07g043500.1 | 0.048   | 0.146   | 2.33           | 8             | 41.1          | 39.93         | 28.39         | 14.7          | 6.02          | 43.4       | 60.55      | 19.39      | 82.57      | 121.39     | 131.43     |
| Solyc01g066760.2 | 0.003   | 0.029   | 2.32           | 0.46          | 2.65          | 0.31          | 0.84          | 0.18          | 0.12          | 3.4        | 2.95       | 5.34       | 8.9        | 5.26       | 8.42       |
| Solyc01g091465.1 | 0.001   | 0.016   | 2.32           | 0.29          | 0.18          | 0.73          | 0.6           | 0.74          | 0.16          | 7.86       | 8.04       | 23.71      | 9.32       | 6.79       | 5.39       |
| Solyc09g014280.1 | <0.001  | 0.004   | 2.32           | 24.34         | 18.91         | 16.23         | 28.51         | 21.76         | 24.98         | 116.47     | 144.29     | 179.46     | 112.67     | 89.12      | 132.81     |
| Solyc02g092790.3 | 0.043   | 0.137   | 2.31           | 1.38          | 12.61         | 4.38          | 3.41          | 3.06          | 0.54          | 6.07       | 31.56      | 16.78      | 41.9       | 28.97      | 27.29      |
| Solyc03g120990.3 | 0.015   | 0.073   | 2.31           | 0.07          | 0.36          | 0.1           | 0.07          | 0.43          | 0.06          | 0.64       | 3.48       | 2.66       | 12.36      | 7.63       | 7.67       |
| Solyc04g071890.3 | 0.014   | 0.07    | 2.3            | 11.25         | 7.91          | 5.2           | 27.56         | 17.94         | 25.3          | 246.92     | 146.04     | 276.07     | 90.09      | 72.86      | 80.54      |
| Solyc01g096320.3 | 0.003   | 0.032   | 2.29           | 0.67          | 0.21          | 0.27          | 2.15          | 1.53          | 1.88          | 6.49       | 4.09       | 7.28       | 10.85      | 7.62       | 15.1       |
| Solyc02g083120.2 | 0.002   | 0.023   | 2.29           | 0.36          | 1.96          | 0.74          | 1.54          | 2.18          | 0.87          | 5.86       | 9.12       | 6.69       | 8.45       | 11.1       | 19.51      |

| TomatoID         | p-value | q-value | DE in Infected | Control1 FPKM | Control2 FPKM | Control3 FPKM | LsoFree1 FPKM | LsoFree2 FPKM | LsoFree3 FPKM | LsoB1 FPKM | LsoB2 FPKM | LsoB3 FPKM | LsoA1 FPKM | LsoA2 FPKM | LsoA3 FPKM |
|------------------|---------|---------|----------------|---------------|---------------|---------------|---------------|---------------|---------------|------------|------------|------------|------------|------------|------------|
| Solyc04g011830.1 | 0.004   | 0.037   | 2.29           | 1.75          | 0.65          | 0.37          | 5.06          | 0.64          | 2.32          | 7.63       | 14.14      | 11.99      | 8.74       | 11.25      | 14.1       |
| Solyc08g067505.1 | 0.048   | 0.147   | 2.29           | 0.7           | 0             | 0             | 3.61          | 0             | 1.49          | 0.52       | 2.23       | 2.2        | 3.43       | 10.16      | 13.45      |
| Solyc11g005150.2 | 0.037   | 0.124   | 2.29           | 0.26          | 3.81          | 0.83          | 0.64          | 0.47          | 0.04          | 1.38       | 9.43       | 3.79       | 18.21      | 12.8       | 9.48       |
| Solyc00g010525.1 | 0.006   | 0.044   | 2.28           | 4.69          | 6.12          | 4.58          | 4.51          | 3.13          | 5.48          | 7.17       | 9.11       | 16.48      | 32.12      | 39.03      | 0          |
| Solyc02g093270.3 | 0.004   | 0.034   | 2.28           | 12.59         | 5.19          | 3.67          | 7.09          | 9.14          | 5.33          | 31.86      | 48.67      | 78.58      | 26.01      | 25.78      | 58.58      |
| Solyc03g115380.2 | 0.002   | 0.024   | 2.28           | 0             | 0             | 0.3           | 0.44          | 0             | 0.03          | 0.88       | 1.53       | 1.2        | 4.08       | 3.09       | 7.19       |
| Solyc03g116510.1 | 0.01    | 0.058   | 2.28           | 3.33          | 2.95          | 2.07          | 2.33          | 1.21          | 3.84          | 18.18      | 25.33      | 58.4       | 13.09      | 10.04      | 9.86       |
| Solyc11g006910.2 | 0.02    | 0.085   | 2.28           | 0             | 0.89          | 0.28          | 1.91          | 3.02          | 0             | 53.92      | 20.84      | 63.41      | 14.84      | 8.23       | 10.05      |
| Solyc02g088630.3 | 0.013   | 0.067   | 2.27           | 5.21          | 6.23          | 6.45          | 5.38          | 4.91          | 3.18          | 7.72       | 63.36      | 46.05      | 46.44      | 29.43      | 36.46      |
| Solyc03g097750.3 | <0.001  | 0.008   | 2.27           | 0.77          | 0.22          | 0.51          | 0.97          | 0.49          | 0.18          | 3.91       | 3.58       | 4.02       | 2.94       | 3.75       | 9.74       |
| Solyc01g009160.2 | 0.027   | 0.105   | 2.26           | 0.43          | 0.77          | 0.59          | 1.13          | 1.03          | 1.02          | 5.11       | 40.62      | 62.1       | 20.97      | 37.4       | 5.26       |
| Solyc07g049370.2 | 0.016   | 0.077   | 2.26           | 0.87          | 3.24          | 0.9           | 1.2           | 1.25          | 0.11          | 2.42       | 4.03       | 2.77       | 7.7        | 4.5        | 21.03      |

| TomatoID         | p-value | q-value | DE in Infected | Control1 FPKM | Control2 FPKM | Control3 FPKM | LsoFree1 FPKM | LsoFree2 FPKM | LsoFree3 FPKM | LsoB1 FPKM | LsoB2 FPKM | LsoB3 FPKM | LsoA1 FPKM | LsoA2 FPKM | LsoA3 FPKM |
|------------------|---------|---------|----------------|---------------|---------------|---------------|---------------|---------------|---------------|------------|------------|------------|------------|------------|------------|
| Solyc09g064820.1 | 0.013   | 0.068   | 2.26           | 0.5           | 0.96          | 0.75          | 3.38          | 0.93          | 3.49          | 5.33       | 7.17       | 4.86       | 24.4       | 9.84       | 13.49      |
| Solyc02g069110.3 | 0.024   | 0.096   | 2.24           | 2.08          | 4.53          | 2.21          | 4.86          | 2.71          | 1             | 5.88       | 13.12      | 3.75       | 18.86      | 15.67      | 35.33      |
| Solyc10g078360.2 | 0.02    | 0.085   | 2.23           | 0             | 0             | 0             | 0             | 0             | 0             | 0.03       | 0          | 0.05       | 0.29       | 0.14       | 11.96      |
| Solyc06g060690.2 | 0.009   | 0.054   | 2.22           | 3.16          | 3.46          | 2.16          | 3.21          | 2.92          | 2.24          | 19.25      | 61.04      | 108.11     | 32.43      | 54.59      | 11.1       |
| Solyc07g053230.3 | 0.007   | 0.048   | 2.22           | 0.13          | 0.44          | 0             | 0.45          | 0.21          | 0             | 8.94       | 22.56      | 37.97      | 12.09      | 10.54      | 2.6        |
| Solyc01g087850.2 | <0.001  | 0.005   | 2.21           | 1.36          | 3.03          | 1.49          | 2.36          | 2.05          | 2.45          | 16.75      | 18.5       | 27.88      | 14.11      | 14.91      | 12.45      |
| Solyc01g006320.3 | 0.005   | 0.038   | 2.2            | 5.22          | 6.44          | 4.49          | 4.43          | 6.93          | 4.16          | 54.75      | 31.93      | 96.03      | 26.57      | 18.15      | 27.37      |
| Solyc06g051010.1 | <0.001  | 0.004   | 2.2            | 10.5          | 10.31         | 9.07          | 11.22         | 9.44          | 7.76          | 36.95      | 63.62      | 80.67      | 45.83      | 53.27      | 52.28      |
| Solyc09g061890.3 | 0.013   | 0.069   | 2.2            | 0             | 1.45          | 0.04          | 0.06          | 0.05          | 0.02          | 0.23       | 1.52       | 1.46       | 2.8        | 1.52       | 9.77       |

| TomatoID         | p-value | q-value | DE in Infected | Control1 FPKM | Control2 FPKM | Control3 FPKM | LsoFree1 FPKM | LsoFree2 FPKM | LsoFree3 FPKM | LsoB1 FPKM | LsoB2 FPKM | LsoB3 FPKM | LsoA1 FPKM | LsoA2 FPKM | LsoA3 FPKM |
|------------------|---------|---------|----------------|---------------|---------------|---------------|---------------|---------------|---------------|------------|------------|------------|------------|------------|------------|
| Solyc03g083010.3 | 0.016   | 0.075   | 2.19           | 9.29          | 7.88          | 8.35          | 8.82          | 9.75          | 8.67          | 10.11      | 31.08      | 20.17      | 63.24      | 21.06      | 86.41      |
| Solyc11g072600.2 | 0.04    | 0.13    | 2.19           | 13.01         | 11.54         | 12.77         | 36.98         | 16.67         | 24.17         | 18.77      | 30.42      | 22.04      | 31.96      | 63.16      | 224.66     |
| Solyc03g083720.1 | 0.001   | 0.015   | 2.18           | 0.3           | 0.75          | 0.49          | 0.47          | 0.1           | 0.39          | 0.94       | 2.18       | 3.11       | 2.73       | 2.91       | 8          |
| Solyc06g069380.3 | 0.036   | 0.123   | 2.18           | 0.97          | 6.12          | 2.66          | 2.58          | 3.44          | 0.44          | 4.19       | 9.46       | 4.74       | 9.54       | 11.75      | 35.49      |
| Solyc04g025650.3 | 0.01    | 0.058   | 2.17           | 13.89         | 10.12         | 13.51         | 13.8          | 11.98         | 18.78         | 31.41      | 172.22     | 162.34     | 136.23     | 79.82      | 54.73      |
| Solyc02g088090.1 | 0.026   | 0.101   | 2.16           | 9.95          | 4.98          | 5.9           | 5.34          | 10.59         | 4.2           | 96.16      | 123.34     | 368.29     | 75.54      | 137.18     | 16.97      |
| Solyc04g074440.1 | 0.039   | 0.13    | 2.16           | 0.47          | 2.14          | 0.46          | 2.1           | 1.47          | 2.05          | 13.31      | 43.23      | 74.91      | 14.93      | 74.82      | 5.6        |
| Solyc04g078750.3 | 0.011   | 0.063   | 2.15           | 5.25          | 22.02         | 10.67         | 9.49          | 6.1           | 5.83          | 13.31      | 46.03      | 41.97      | 44.06      | 39.97      | 49.26      |
| Solyc12g094520.2 | 0.007   | 0.048   | 2.15           | 36.26         | 30.12         | 29.47         | 38.39         | 41.27         | 42.05         | 49.41      | 187        | 125.03     | 142.68     | 102.87     | 314.63     |
| Solyc02g071030.2 | 0.011   | 0.062   | 2.14           | 583.82        | 765.4         | 864.03        | 605.21        | 249.24        | 398.96        | 1989.46    | 789.04     | 296.67     | 1189.46    | 1107.74    | 1961.55    |
| Solyc02g082930.3 | 0.013   | 0.066   | 2.14           | 1.31          | 6.56          | 1.28          | 4.5           | 10.53         | 2.15          | 23.54      | 26.43      | 44.75      | 28.01      | 21.87      | 51.47      |
| Solyc03g082660.3 | 0.006   | 0.044   | 2.14           | 14.75         | 29.19         | 23.19         | 18.72         | 18.91         | 11.37         | 28.93      | 107.57     | 77.41      | 102.91     | 90.46      | 119.3      |

| TomatoID         | p-value | q-value | DE in Infected | Control1 FPKM | Control2 FPKM | Control3 FPKM | LsoFree1 FPKM | LsoFree2 FPKM | LsoFree3 FPKM | LsoB1 FPKM | LsoB2 FPKM | LsoB3 FPKM | LsoA1 FPKM | LsoA2 FPKM | LsoA3 FPKM |
|------------------|---------|---------|----------------|---------------|---------------|---------------|---------------|---------------|---------------|------------|------------|------------|------------|------------|------------|
| Solyc04g081530.1 | 0.017   | 0.077   | 2.14           | 22.17         | 9.71          | 13.92         | 16.03         | 23.63         | 23.54         | 25.39      | 120.54     | 69.89      | 106.79     | 49.31      | 149.74     |
| Solyc07g052510.4 | 0.006   | 0.045   | 2.13           | 0             | 0             | 0             | 0.09          | 0             | 0.09          | 0.62       | 1.23       | 0.07       | 2.05       | 2.77       | 6.54       |
| Solyc07g064820.1 | <0.001  | 0.004   | 2.13           | 0.36          | 0.51          | 0.25          | 0.57          | 0.4           | 0.49          | 3.66       | 8.96       | 6.1        | 8.4        | 7.63       | 5.41       |
| Solyc12g037930.2 | 0.008   | 0.05    | 2.13           | 2.49          | 8.5           | 5.19          | 5.24          | 4.37          | 3.18          | 9.9        | 9.62       | 6.86       | 18.51      | 19.75      | 37.61      |
| Solyc03g116070.1 | <0.001  | 0.004   | 2.12           | 0             | 0             | 0             | 0.25          | 0             | 0             | 3.19       | 2.89       | 1.57       | 2          | 2.63       | 4.72       |
| Solyc04g071400.3 | 0.02    | 0.086   | 2.12           | 0.16          | 0.13          | 0.08          | 0.11          | 0.06          | 0             | 0.27       | 3.82       | 0.19       | 3.13       | 3.19       | 7.51       |
| Solyc06g051620.3 | 0.003   | 0.029   | 2.12           | 1.14          | 0.38          | 0.62          | 1.28          | 1.33          | 0.79          | 5.2        | 8.12       | 13.07      | 4.08       | 3.85       | 12.09      |
| Solyc06g083650.3 | 0.004   | 0.034   | 2.12           | 0             | 1.16          | 0.3           | 0.04          | 0.05          | 0             | 1.38       | 0.78       | 1          | 2.99       | 4.29       | 5.41       |
| Solyc09g065620.3 | 0.028   | 0.105   | 2.12           | 1.76          | 8.46          | 4.79          | 2.97          | 1.89          | 3.27          | 2.04       | 4.12       | 1.86       | 4.05       | 8.61       | 34.18      |
| Solyc12g014420.2 | 0.022   | 0.092   | 2.12           | 0.88          | 2.34          | 1.23          | 1.86          | 1.95          | 0.66          | 1.9        | 9.12       | 6.28       | 5.45       | 4.51       | 25.99      |

| TomatoID         | p-value | q-value | DE in Infected | Control1 FPKM | Control2 FPKM | Control3 FPKM | LsoFree1 FPKM | LsoFree2 FPKM | LsoFree3 FPKM | LsoB1 FPKM | LsoB2 FPKM | LsoB3 FPKM | LsoA1 FPKM | LsoA2 FPKM | LsoA3 FPKM |
|------------------|---------|---------|----------------|---------------|---------------|---------------|---------------|---------------|---------------|------------|------------|------------|------------|------------|------------|
| Solyc03g118450.1 | 0.025   | 0.1     | 2.11           | 0.38          | 0.94          | 1.03          | 2.62          | 1.01          | 1.77          | 3.23       | 23         | 29.72      | 10.21      | 23.89      | 8.52       |
| Solyc05g007490.3 | 0.001   | 0.02    | 2.11           | 6.05          | 8.21          | 6.42          | 5.16          | 4.84          | 3.83          | 9.47       | 24.42      | 18.86      | 24.51      | 25.17      | 35.46      |
| Solyc09g083445.1 | 0.039   | 0.129   | 2.11           | 0             | 0.76          | 0             | 0.6           | 0.43          | 0             | 1.29       | 0.65       | 0          | 4.43       | 2.24       | 11.83      |
| Solyc11g010390.1 | <0.001  | 0.008   | 2.11           | 18.85         | 29.18         | 27.73         | 23.12         | 20.89         | 14.35         | 94.01      | 154.43     | 137.43     | 126.34     | 148.78     | 83.46      |
| Solyc01g099370.3 | 0.025   | 0.099   | 2.1            | 18.07         | 13.68         | 14.5          | 18.04         | 20.57         | 16.86         | 55.99      | 403.05     | 421.01     | 158.1      | 308.26     | 58.43      |
| Solyc05g015840.3 | 0.016   | 0.075   | 2.1            | 3.41          | 5.18          | 2.3           | 2.17          | 5.64          | 1.25          | 11.85      | 59.8       | 67.75      | 22.47      | 19.22      | 24.36      |
| Solyc07g054220.1 | <0.001  | 0.012   | 2.1            | 1.97          | 2.2           | 1.55          | 2.45          | 2.09          | 2.86          | 6.04       | 10.52      | 12.3       | 12.23      | 19.07      | 14.89      |
| Solyc10g055780.1 | 0.02    | 0.086   | 2.1            | 0.31          | 6.82          | 2.45          | 0.64          | 3.64          | 1.39          | 23.44      | 9.65       | 13.05      | 19.34      | 9.65       | 11.94      |
| Solyc11g039860.2 | 0.02    | 0.086   | 2.1            | 302.48        | 572.81        | 417.43        | 360.64        | 191.78        | 573.25        | 332.23     | 497.11     | 787.86     | 1691.68    | 1961.7     | 1339.53    |
| Solyc01g079600.3 | 0.038   | 0.127   | 2.09           | 2.34          | 2.03          | 2.48          | 3.51          | 3.39          | 4.15          | 4.08       | 36.45      | 60.26      | 21.28      | 34.93      | 18.19      |
| Solyc04g051360.3 | 0.047   | 0.144   | 2.09           | 0             | 0             | 0             | 0             | 0             | 0             | 0.22       | 4.05       | 8.06       | 0.37       | 0.57       | 6.98       |

| TomatoID         | p-value | q-value | DE in Infected | Control1 FPKM | Control2 FPKM | Control3 FPKM | LsoFree1 FPKM | LsoFree2 FPKM | LsoFree3 FPKM | LsoB1 FPKM | LsoB2 FPKM | LsoB3 FPKM | LsoA1 FPKM | LsoA2 FPKM | LsoA3 FPKM |
|------------------|---------|---------|----------------|---------------|---------------|---------------|---------------|---------------|---------------|------------|------------|------------|------------|------------|------------|
| Solyc08g082820.3 | 0.004   | 0.036   | 2.09           | 9.09          | 14.79         | 12.19         | 13.64         | 9.28          | 7.16          | 85.22      | 47.75      | 134.6      | 46.25      | 38.97      | 39.27      |
| Solyc03g020040.3 | 0.022   | 0.092   | 2.08           | 0             | 0.35          | 0.08          | 0             | 0.35          | 0             | 0.42       | 8.84       | 2.87       | 6.02       | 2.05       | 7.69       |
| Solyc04g076570.3 | 0.003   | 0.032   | 2.08           | 4.45          | 4.94          | 5.35          | 4.74          | 3.49          | 3.42          | 6.43       | 6.37       | 5.1        | 12.19      | 11.76      | 35.31      |
| Solyc06g053640.1 | 0.003   | 0.031   | 2.08           | 0.42          | 0.85          | 0.19          | 0.07          | 0.41          | 0.21          | 2.47       | 10.4       | 8.08       | 11.18      | 10.82      | 4.04       |
| Solyc06g069070.1 | 0.039   | 0.128   | 2.08           | 1.79          | 6.83          | 2.65          | 3.05          | 4.8           | 0.18          | 10.36      | 37.9       | 8.28       | 30.93      | 21.39      | 28.36      |
| Solyc09g031920.1 | 0.001   | 0.016   | 2.08           | 7.83          | 10.81         | 10.23         | 11.36         | 10.8          | 9.18          | 20.4       | 43.32      | 40.16      | 29.27      | 40.59      | 69.99      |
| Solyc03g116590.3 | 0.003   | 0.032   | 2.07           | 28.83         | 34.04         | 28.63         | 27.73         | 34.52         | 18.83         | 50.56      | 153.77     | 100.91     | 96.58      | 112.99     | 208.98     |
| Solyc05g005160.3 | <0.001  | 0.009   | 2.07           | 5.88          | 13.14         | 7             | 9.6           | 6.55          | 5.5           | 26.48      | 25.31      | 31.06      | 29.45      | 28.63      | 43.82      |
| Solyc10g008000.1 | 0.003   | 0.031   | 2.07           | 0             | 0.26          | 0.31          | 0.23          | 1.97          | 0             | 7.11       | 3.44       | 11.92      | 4.86       | 7.62       | 7.25       |
| Solyc01g080600.3 | 0.015   | 0.074   | 2.06           | 1.3           | 8.06          | 2.5           | 1.63          | 2.57          | 0.64          | 15.13      | 7.01       | 15.97      | 23.51      | 12.81      | 12.13      |
| Solyc02g069910.2 | 0.045   | 0.141   | 2.06           | 10.98         | 22.85         | 16.34         | 9.41          | 4.59          | 4.01          | 18.09      | 92.35      | 53.56      | 64.45      | 80.32      | 25.76      |

| TomatoID         | p-value | q-value | DE in Infected | Control1 FPKM | Control2 FPKM | Control3 FPKM | LsoFree1 FPKM | LsoFree2 FPKM | LsoFree3 FPKM | LsoB1 FPKM | LsoB2 FPKM | LsoB3 FPKM | LsoA1 FPKM | LsoA2 FPKM | LsoA3 FPKM |
|------------------|---------|---------|----------------|---------------|---------------|---------------|---------------|---------------|---------------|------------|------------|------------|------------|------------|------------|
| Solyc06g066600.3 | 0.003   | 0.032   | 2.06           | 0.25          | 1.97          | 0.34          | 0.31          | 0.37          | 0             | 2.48       | 2.79       | 3.34       | 7.59       | 5.31       | 6.13       |
| Solyc07g007870.3 | 0.004   | 0.036   | 2.06           | 21.09         | 20.19         | 17.91         | 29.49         | 24.74         | 23.55         | 35.85      | 73.31      | 63.28      | 64.48      | 63.17      | 195        |
| Solyc08g083370.3 | 0.043   | 0.136   | 2.06           | 0.7           | 5.74          | 4.23          | 1.84          | 0.53          | 0.17          | 3.61       | 3.5        | 0.98       | 7.32       | 8.65       | 10.03      |
| Solyc10g006660.3 | 0.04    | 0.13    | 2.06           | 8.99          | 4.61          | 5.37          | 4.9           | 8.76          | 6.17          | 49.93      | 125.54     | 259.72     | 67.87      | 188        | 14.4       |
| Solyc04g054950.3 | 0.008   | 0.05    | 2.05           | 1.72          | 0.71          | 1.42          | 0.22          | 0.47          | 0.68          | 6.58       | 10.74      | 18.48      | 6.26       | 4.51       | 3.67       |
| Solyc06g049020.1 | 0.013   | 0.066   | 2.05           | 20.88         | 24.63         | 12.71         | 10.55         | 29.34         | 32.84         | 74.24      | 170.16     | 319.39     | 155.57     | 214.02     | 71.69      |
| Solyc07g016215.1 | 0.018   | 0.081   | 2.05           | 0.06          | 0.44          | 0             | 0.15          | 0.19          | 0             | 1.86       | 6.81       | 1.09       | 13.58      | 5.47       | 4.62       |
| Solyc08g075870.3 | 0.016   | 0.076   | 2.05           | 0.68          | 2.66          | 0.65          | 1.16          | 1.49          | 0.34          | 2.42       | 7.85       | 14.51      | 5.22       | 5.51       | 15.09      |
| Solyc12g040570.1 | 0.004   | 0.034   | 2.05           | 0             | 1.12          | 0             | 0             | 1.04          | 0.65          | 4.07       | 13.71      | 16.38      | 10.31      | 6.37       | 5.6        |
| Solyc01g080910.2 | 0.034   | 0.118   | 2.04           | 16.59         | 15.13         | 18.46         | 20.48         | 18.2          | 14.98         | 30.11      | 22.29      | 9.68       | 61.21      | 61.6       | 135.1      |
| Solyc02g087770.3 | 0.001   | 0.019   | 2.04           | 8.2           | 7.41          | 7.15          | 7.81          | 7.53          | 5.88          | 17.31      | 18.81      | 15.72      | 40.63      | 25.5       | 47.12      |

| TomatoID         | p-value | q-value | DE in Infected | Control1 FPKM | Control2 FPKM | Control3 FPKM | LsoFree1 FPKM | LsoFree2 FPKM | LsoFree3 FPKM | LsoB1 FPKM | LsoB2 FPKM | LsoB3 FPKM | LsoA1 FPKM | LsoA2 FPKM | LsoA3 FPKM |
|------------------|---------|---------|----------------|---------------|---------------|---------------|---------------|---------------|---------------|------------|------------|------------|------------|------------|------------|
| Solyc05g050560.1 | 0.005   | 0.039   | 2.04           | 6.97          | 5.61          | 6.15          | 6.42          | 6.9           | 8.61          | 8.4        | 29.22      | 18.86      | 28.6       | 21.08      | 50.38      |
| Solyc07g017600.3 | 0.003   | 0.032   | 2.04           | 5.53          | 13.78         | 8.12          | 11.7          | 6.37          | 8.52          | 14.35      | 31.1       | 19.51      | 27.84      | 32.82      | 55.57      |
| Solyc09g008280.2 | 0.014   | 0.072   | 2.04           | 54.04         | 139.23        | 84.33         | 73.4          | 62.2          | 29.57         | 105.06     | 273.94     | 190.1      | 257.69     | 278.49     | 408.37     |
| Solyc09g089930.2 | 0.012   | 0.066   | 2.04           | 2             | 4.16          | 1.8           | 3.49          | 5.64          | 6.15          | 46.69      | 51.4       | 61.78      | 21.44      | 12.48      | 20.5       |
| Solyc01g102390.3 | 0.016   | 0.077   | 2.03           | 8.34          | 10.64         | 4.02          | 3.56          | 3.89          | 2.62          | 32.34      | 30.53      | 63.93      | 20.4       | 13.57      | 19.08      |
| Solyc02g093230.3 | 0.042   | 0.135   | 2.03           | 1.78          | 2.05          | 1.91          | 0.78          | 1.03          | 1             | 5.65       | 41.38      | 39.37      | 28.29      | 22.37      | 4.26       |
| Solyc07g008410.3 | 0.036   | 0.122   | 2.03           | 0             | 0.69          | 0.09          | 0.22          | 0.07          | 0             | 0.61       | 0.72       | 0.08       | 6.84       | 3.05       | 6.33       |
| Solyc01g107390.3 | 0.006   | 0.043   | 2.02           | 0.07          | 0.11          | 0.07          | 0.07          | 0.1           | 0.07          | 1.33       | 6.6        | 11.15      | 2.92       | 3.43       | 3.86       |
| Solyc02g082430.3 | 0.001   | 0.015   | 2.02           | 4.07          | 4.32          | 4.21          | 6.16          | 4.2           | 8.03          | 10.73      | 21.14      | 15.43      | 19.28      | 15.82      | 31.7       |
| Solyc03g112960.1 | <0.001  | 0.003   | 2.02           | 2.73          | 4             | 2.9           | 2.44          | 2.07          | 2.35          | 8.44       | 7.78       | 13.14      | 11.21      | 12.23      | 13.98      |

| TomatoID         | p-value | q-value | DE in Infected | Control1 FPKM | Control2 FPKM | Control3 FPKM | LsoFree1 FPKM | LsoFree2 FPKM | LsoFree3 FPKM | LsoB1 FPKM | LsoB2 FPKM | LsoB3 FPKM | LsoA1 FPKM | LsoA2 FPKM | LsoA3 FPKM |
|------------------|---------|---------|----------------|---------------|---------------|---------------|---------------|---------------|---------------|------------|------------|------------|------------|------------|------------|
| Solyc10g050160.2 | 0.016   | 0.077   | 2.02           | 2.66          | 10.29         | 1.6           | 3.83          | 4.02          | 2.6           | 9.66       | 17.5       | 28.45      | 13.64      | 11.56      | 33.31      |
| Solyc04g072000.3 | 0.004   | 0.036   | 2.01           | 3.9           | 4.82          | 3.75          | 2.93          | 3.15          | 3.13          | 20.56      | 46.03      | 37.57      | 31.97      | 11.12      | 14.21      |
| Solyc06g083050.3 | 0.013   | 0.066   | 2.01           | 0.4           | 0.44          | 0.94          | 0.27          | 0             | 0             | 1.12       | 0.9        | 0          | 3.73       | 4.04       | 4.89       |
| Solyc07g007590.1 | 0.001   | 0.016   | 2.01           | 6.89          | 7.2           | 6.82          | 5.71          | 6.03          | 4.73          | 21.59      | 49.17      | 51.95      | 47.95      | 53.19      | 22.2       |
| Solyc11g010500.1 | 0.021   | 0.087   | 2.01           | 18.01         | 22.98         | 11.85         | 18.83         | 22.05         | 16.62         | 61.34      | 392.78     | 366.48     | 315.76     | 301.29     | 60.92      |
| Solyc12g036470.2 | 0.001   | 0.017   | 2.01           | 0             | 0             | 0.09          | 0             | 0.04          | 0             | 1.77       | 2.03       | 3          | 0.55       | 1.37       | 4.74       |
| Solyc02g082260.3 | 0.037   | 0.125   | 2              | 0.51          | 3.75          | 0.74          | 1.65          | 1.05          | 0.76          | 2.24       | 3.9        | 1.73       | 9.47       | 11.6       | 13.56      |
| Solyc01g102640.2 | 0.01    | 0.058   | -2             | 5.78          | 8.82          | 2.43          | 2.14          | 12.16         | 2.76          | 0.72       | 1.66       | 1.96       | 0.4        | 1.93       | 1.24       |
| Solyc02g077770.3 | 0.001   | 0.017   | -2.01          | 21.17         | 10.51         | 16.8          | 22.26         | 22.87         | 33.89         | 6.94       | 4.83       | 3.72       | 5.21       | 4.41       | 4.02       |

| TomatoID         | p-value | q-value | DE in Infected | Control1 FPKM | Control2 FPKM | Control3 FPKM | LsoFree1 FPKM | LsoFree2 FPKM | LsoFree3 FPKM | LsoB1 FPKM | LsoB2 FPKM | LsoB3 FPKM | LsoA1 FPKM | LsoA2 FPKM | LsoA3 FPKM |
|------------------|---------|---------|----------------|---------------|---------------|---------------|---------------|---------------|---------------|------------|------------|------------|------------|------------|------------|
| Solyc10g018580.1 | 0.001   | 0.017   | -2.01          | 3.85          | 3.56          | 4.27          | 8.59          | 1.51          | 4.12          | 0          | 0          | 0          | 0          | 0          | 0          |
| Solyc01g094210.2 | 0.001   | 0.015   | -2.02          | 54.31         | 55.79         | 56.77         | 44.62         | 74.76         | 39.85         | 36.54      | 27.6       | 21.14      | 21.71      | 15.15      | 10.01      |
| Solyc03g006880.3 | 0.023   | 0.094   | -2.02          | 5.49          | 20.5          | 8.7           | 14.77         | 15.75         | 6.01          | 5.36       | 4.21       | 0.5        | 5.04       | 7.14       | 2.43       |
| Solyc04g076010.3 | 0.003   | 0.029   | -2.02          | 58.91         | 48.04         | 50.98         | 56.49         | 86.35         | 62.41         | 45.51      | 26.89      | 38.34      | 17.2       | 13.06      | 12.43      |
| Solyc08g066350.2 | 0.001   | 0.017   | -2.02          | 8.46          | 9.03          | 11.61         | 6.8           | 12.75         | 16.94         | 1.57       | 4.24       | 2.33       | 3.21       | 3.24       | 1.35       |
| Solyc11g012680.2 | 0.001   | 0.016   | -2.02          | 70.26         | 64.8          | 54.55         | 65.63         | 113.52        | 75.67         | 63.86      | 42         | 45.93      | 33.43      | 25.75      | 13.87      |
| Solyc03g097930.3 | 0.001   | 0.019   | -2.03          | 48.8          | 26            | 40.38         | 24.3          | 61.88         | 24.67         | 13.71      | 20.13      | 11.93      | 15.07      | 8.94       | 8.28       |
| Solyc10g051020.2 | 0.046   | 0.144   | -2.04          | 65.66         | 62.73         | 38.4          | 24.61         | 112.78        | 26.01         | 46.88      | 60.42      | 133.3      | 14.04      | 11.3       | 6.47       |
| Solyc10g051030.2 | 0.046   | 0.144   | -2.04          | 5.01          | 5.28          | 3.47          | 3.56          | 11.79         | 1.49          | 3.81       | 3.8        | 5.09       | 6.48       | 4.53       | 3.02       |
| Solyc10g084070.1 | 0.026   | 0.101   | -2.04          | 12.23         | 8.92          | 6.25          | 1.4           | 9.7           | 2.43          | 1.44       | 1.34       | 2.47       | 2.07       | 0.41       | 0.35       |
| Solyc06g076490.3 | <0.001  | 0.003   | -2.05          | 32.45         | 20.82         | 27.88         | 35.21         | 42.47         | 38.66         | 10.85      | 9.05       | 12.23      | 9.22       | 9.23       | 7.01       |
| Solyc11g010270.2 | <0.001  | 0.009   | -2.05          | 477.12        | 373.22        | 424.87        | 526.75        | 614.31        | 662.42        | 263.97     | 202.76     | 191.73     | 135.56     | 196.91     | 99.07      |

| TomatoID         | p-value | q-value | DE in Infected | Control1 FPKM | Control2 FPKM | Control3 FPKM | LsoFree1 FPKM | LsoFree2 FPKM | LsoFree3 FPKM | LsoB1 FPKM | LsoB2 FPKM | LsoB3 FPKM | LsoA1 FPKM | LsoA2 FPKM | LsoA3 FPKM |
|------------------|---------|---------|----------------|---------------|---------------|---------------|---------------|---------------|---------------|------------|------------|------------|------------|------------|------------|
| Solyc12g096490.1 | 0.007   | 0.046   | -2.05          | 24.16         | 11.72         | 17.66         | 33.7          | 14.74         | 47.31         | 7.22       | 4.03       | 2.29       | 4.53       | 4.18       | 3.31       |
| Solyc05g054850.1 | 0.004   | 0.035   | -2.06          | 3.52          | 4.62          | 2.1           | 2.79          | 6.38          | 0.51          | 1.19       | 0.43       | 0.15       | 1.15       | 0.37       | 0.26       |
| Solyc06g008760.1 | 0.003   | 0.029   | -2.06          | 294.14        | 170.98        | 291.13        | 180.14        | 142.77        | 209.83        | 52.15      | 51.42      | 33.59      | 78.15      | 68.13      | 26.39      |
| Solyc10g051120.2 | 0.006   | 0.044   | -2.06          | 8.69          | 3.39          | 8.88          | 5.89          | 4.14          | 10.28         | 1.93       | 0          | 0          | 0          | 0.94       | 0          |
| Solyc12g056950.2 | <0.001  | 0.012   | -2.07          | 54.3          | 47.62         | 62.3          | 40.39         | 59.36         | 50.07         | 24.79      | 17.49      | 10.32      | 14.75      | 12.73      | 8.62       |
| Solyc03g025350.3 | 0.016   | 0.076   | -2.08          | 3.17          | 0.54          | 0.78          | 0.51          | 10.12         | 0.19          | 0.47       | 0.37       | 0.98       | 0.35       | 0.27       | 0.03       |
| Solyc00g203660.2 | 0.001   | 0.015   | -2.09          | 2.51          | 5.45          | 9.21          | 5.5           | 2.59          | 8.74          | 0          | 0          | 0          | 0          | 0          | 0          |
| Solyc06g069060.1 | 0.001   | 0.019   | -2.09          | 11.16         | 7.13          | 11.91         | 4.82          | 6.5           | 9.43          | 1.94       | 0.74       | 0.68       | 0.1        | 1.06       | 0.34       |
| Solyc08g068490.3 | 0.007   | 0.048   | -2.09          | 8.26          | 38.34         | 19.01         | 14.86         | 14.49         | 22.08         | 4.27       | 4.76       | 1.52       | 4.5        | 5.42       | 2.34       |
| Solyc04g081460.2 | <0.001  | 0.009   | -2.11          | 33.17         | 40.76         | 47.81         | 42.75         | 33.54         | 53.75         | 15.27      | 12.06      | 9.07       | 8.88       | 10.35      | 5.63       |
| Solyc07g014620.1 | 0.006   | 0.042   | -2.11          | 10.22         | 4.66          | 6.99          | 12.91         | 21.5          | 11.66         | 11.35      | 5.38       | 3.75       | 3.95       | 2.08       | 1.93       |

| TomatoID         | p-value | q-value | DE in Infected | Control1 FPKM | Control2 FPKM | Control3 FPKM | LsoFree1 FPKM | LsoFree2 FPKM | LsoFree3 FPKM | LsoB1 FPKM | LsoB2 FPKM | LsoB3 FPKM | LsoA1 FPKM | LsoA2 FPKM | LsoA3 FPKM |
|------------------|---------|---------|----------------|---------------|---------------|---------------|---------------|---------------|---------------|------------|------------|------------|------------|------------|------------|
| Solyc07g056280.3 | 0.011   | 0.063   | -2.11          | 22.57         | 10.18         | 13.09         | 4.93          | 28.27         | 6.06          | 4.17       | 4.3        | 6.65       | 3.65       | 2.16       | 2.26       |
| Solyc09g082980.3 | 0.005   | 0.039   | -2.11          | 139.97        | 115.33        | 116.21        | 128.4         | 169.16        | 128.91        | 55.58      | 32.05      | 10.53      | 38.71      | 43.63      | 32.06      |
| Solyc10g080670.2 | 0.024   | 0.095   | -2.11          | 190.84        | 71.28         | 133.45        | 246.54        | 215.83        | 483.9         | 119.8      | 73.63      | 106.54     | 46.39      | 47.32      | 32.81      |
| Solyc02g084930.3 | <0.001  | 0.009   | -2.12          | 4.97          | 3.91          | 5.2           | 4.91          | 10.5          | 5.84          | 2.21       | 1.49       | 2.19       | 0.81       | 0.71       | 0.68       |
| Solyc12g036550.2 | <0.001  | 0.001   | -2.12          | 2.58          | 4.58          | 2.55          | 3.98          | 2.81          | 3.06          | 0          | 0          | 0.07       | 0          | 0          | 0          |
| Solyc04g007210.3 | 0.001   | 0.015   | -2.13          | 57.74         | 45.65         | 60.07         | 56.6          | 48            | 75.53         | 20.09      | 14.47      | 7.97       | 9.7        | 17.8       | 8.33       |
| Solyc04g082480.3 | 0.001   | 0.018   | -2.13          | 21.03         | 17.29         | 18.4          | 8.87          | 25.47         | 10.94         | 6.51       | 7.3        | 6.4        | 5.04       | 4.33       | 2.2        |
| Solyc12g006630.2 | <0.001  | 0.011   | -2.13          | 11.11         | 17.22         | 15.31         | 14.95         | 24.45         | 21.13         | 5.55       | 4.07       | 3.31       | 2.54       | 6.56       | 3.19       |
| Solyc06g074800.1 | <0.001  | 0.009   | -2.14          | 11.92         | 13.13         | 12            | 7.18          | 14.03         | 10.99         | 3.94       | 2.58       | 1.23       | 1.88       | 1.9        | 1.46       |
| Solyc11g069700.2 | 0.018   | 0.08    | -2.14          | 106.61        | 56.04         | 45.67         | 47.19         | 345.7         | 22.77         | 61.93      | 126.68     | 141.11     | 43.22      | 52.45      | 24.17      |
| Solyc00g013170.1 | <0.001  | 0.008   | -2.15          | 8.43          | 7.83          | 9.6           | 12.69         | 9.15          | 6.24          | 1.32       | 2.13       | 3.89       | 1.37       | 2.66       | 1.08       |
| Solyc01g100490.3 | 0.006   | 0.044   | -2.15          | 36.26         | 41.14         | 32.66         | 27            | 37.17         | 34.89         | 31.17      | 23.36      | 11.67      | 15.35      | 10.68      | 3.49       |
| Solyc05g010427.1 | 0.018   | 0.08    | -2.15          | 2.65          | 2.15          | 0.16          | 2.81          | 4.94          | 2.95          | 0.32       | 6.95       | 0.25       | 0.48       | 0.29       | 0.25       |

| TomatoID         | p-value | q-value | DE in Infected | Control1 FPKM | Control2 FPKM | Control3 FPKM | LsoFree1 FPKM | LsoFree2 FPKM | LsoFree3 FPKM | LsoB1 FPKM | LsoB2 FPKM | LsoB3 FPKM | LsoA1 FPKM | LsoA2 FPKM | LsoA3 FPKM |
|------------------|---------|---------|----------------|---------------|---------------|---------------|---------------|---------------|---------------|------------|------------|------------|------------|------------|------------|
| Solyc06g061240.3 | 0.002   | 0.025   | -2.15          | 105.45        | 72.75         | 87.39         | 117.52        | 147.94        | 179.97        | 69.58      | 47.01      | 46.38      | 26.29      | 27.71      | 21.49      |
| Solyc10g080910.1 | <0.001  | 0.006   | -2.15          | 4.33          | 4.76          | 5.59          | 3.99          | 3.83          | 3.52          | 0          | 0          | 0          | 0.93       | 0.43       | 0          |
| Solyc08g005305.1 | <0.001  | 0.002   | -2.16          | 7.42          | 5.4           | 6.29          | 5.31          | 6.65          | 5.72          | 0.35       | 0.56       | 0.66       | 0          | 0.66       | 0.73       |
| Solyc01g098130.2 | <0.001  | 0.009   | -2.17          | 15.32         | 14.34         | 16.19         | 26.03         | 13.73         | 24.63         | 4.12       | 3.1        | 1.83       | 1.92       | 1.88       | 3.3        |
| Solyc06g060830.3 | <0.001  | 0.01    | -2.17          | 8.75          | 16.48         | 11.1          | 19.1          | 19.16         | 11.38         | 6.04       | 4.65       | 2.11       | 3.13       | 4.56       | 2.85       |
| Solyc10g054820.2 | 0.003   | 0.033   | -2.17          | 44.19         | 49.6          | 44.58         | 25.29         | 42.26         | 26.27         | 17.14      | 8.22       | 4.87       | 14.62      | 11.38      | 4.93       |
| Solyc07g014680.3 | 0.002   | 0.027   | -2.18          | 7.42          | 15.97         | 16.53         | 22.97         | 21.58         | 35.26         | 5.2        | 4.12       | 4.27       | 2.6        | 3.22       | 3.65       |
| Solyc10g080920.2 | <0.001  | 0.007   | -2.19          | 13.12         | 15.93         | 16.67         | 12.52         | 10.64         | 17.1          | 2.16       | 2.86       | 2.15       | 4.49       | 2.62       | 1.27       |
| Solyc03g119320.1 | <0.001  | 0.001   | -2.2           | 14.08         | 10.07         | 11.62         | 11.14         | 13.75         | 11.68         | 3.56       | 2.35       | 1.81       | 2.75       | 2.56       | 1.46       |
| Solyc07g066330.3 | 0.042   | 0.135   | -2.2           | 5.42          | 2.19          | 6.07          | 17.03         | 7.6           | 34.44         | 2.43       | 1.53       | 2.1        | 0.18       | 1.23       | 0.89       |
| Solyc00g126000.1 | 0.001   | 0.015   | -2.22          | 4.83          | 5.59          | 8.66          | 12.86         | 10.99         | 10.27         | 1.12       | 1.25       | 2.4        | 0.78       | 0.74       | 1.7        |
| Solyc03g070430.1 | <0.001  | 0.008   | -2.22          | 3.74          | 3.02          | 4.59          | 4.28          | 5.8           | 1.8           | 0.73       | 0.73       | 1.16       | 0.84       | 0.02       | 0.06       |
| Solyc04g080040.3 | 0.005   | 0.039   | -2.22          | 42.7          | 48.24         | 42.95         | 19.44         | 45.32         | 17.05         | 18.93      | 12.67      | 10.63      | 10.97      | 6.65       | 4.39       |
| Solyc08g074893.1 | <0.001  | 0.006   | -2.22          | 3.57          | 3.48          | 2.74          | 5.19          | 5.85          | 8.11          | 0.7        | 0.72       | 0.55       | 0.77       | 0.97       | 0.2        |

| TomatoID         | p-value | q-value | DE in Infected | Control1 FPKM | Control2 FPKM | Control3 FPKM | LsoFree1 FPKM | LsoFree2 FPKM | LsoFree3 FPKM | LsoB1 FPKM | LsoB2 FPKM | LsoB3 FPKM | LsoA1 FPKM | LsoA2 FPKM | LsoA3 FPKM |
|------------------|---------|---------|----------------|---------------|---------------|---------------|---------------|---------------|---------------|------------|------------|------------|------------|------------|------------|
| Solyc09g090360.3 | 0.005   | 0.04    | -2.22          | 3.83          | 4.83          | 5.77          | 6.02          | 11.87         | 1             | 1.95       | 2.89       | 1.34       | 6.48       | 1.53       | 0.47       |
| Solyc03g058390.2 | <0.001  | <0.001  | -2.23          | 34.02         | 35.4          | 35.69         | 45.23         | 37.18         | 42.36         | 6.42       | 6.94       | 8.21       | 8.33       | 8.18       | 7.66       |
| Solyc03g119910.3 | 0.027   | 0.104   | -2.23          | 17.19         | 9             | 10.66         | 15.79         | 17.02         | 4.31          | 6.64       | 10.15      | 0.85       | 15.11      | 4.98       | 1.43       |
| Solyc02g011830.1 | <0.001  | 0.001   | -2.24          | 4.6           | 5.35          | 6.16          | 4.94          | 3.14          | 3.12          | 0          | 0          | 0          | 0          | 0          | 0          |
| Solyc08g081700.1 | 0.011   | 0.06    | -2.25          | 27.44         | 15.98         | 21.52         | 13.92         | 34.96         | 12.55         | 19.79      | 11.25      | 14.25      | 6.52       | 3.53       | 2.27       |
| Solyc00g126010.1 | <0.001  | 0.009   | -2.27          | 3.93          | 8.32          | 7.99          | 10.46         | 5.88          | 10.3          | 1.27       | 0.72       | 1.14       | 0.95       | 1.16       | 0.37       |
| Solyc10g005080.3 | 0.01    | 0.058   | -2.27          | 17.08         | 20.96         | 15.12         | 9.5           | 31.16         | 9.86          | 10.77      | 12.3       | 12.39      | 3.81       | 2.16       | 2.45       |
| Solyc11g021310.1 | <0.001  | <0.001  | -2.27          | 4.38          | 5.97          | 5.4           | 5.11          | 4.03          | 3.35          | 0.06       | 0          | 0.03       | 0          | 0.13       | 0.18       |
| Solyc05g023730.1 | <0.001  | 0.004   | -2.28          | 63.6          | 77.45         | 62.78         | 62.45         | 29.46         | 79.8          | 5.6        | 6.72       | 6.12       | 7.98       | 8.35       | 8.64       |
| Solyc08g075740.1 | 0.001   | 0.018   | -2.28          | 16.75         | 18.45         | 20.93         | 23            | 18.39         | 26.43         | 9.02       | 4.45       | 6.18       | 3.88       | 2          | 2.31       |
| Solyc05g049990.3 | <0.001  | 0.014   | -2.29          | 46.29         | 54.79         | 62.94         | 30.17         | 65.37         | 34.11         | 18.83      | 18.05      | 15.46      | 16.33      | 10.29      | 6.49       |
| Solyc11g066510.2 | 0.001   | 0.019   | -2.29          | 12.97         | 12.44         | 22.13         | 12.45         | 12.1          | 17.05         | 5.8        | 1.71       | 1.68       | 2          | 2.05       | 0.84       |
| Solyc12g005750.1 | <0.001  | 0.007   | -2.29          | 5.23          | 5.02          | 2.16          | 2.09          | 4.8           | 2.42          | 0.24       | 0.37       | 0.05       | 0.05       | 0          | 0          |

| TomatoID         | p-value | q-value | DE in Infected | Control1 FPKM | Control2 FPKM | Control3 FPKM | LsoFree1 FPKM | LsoFree2 FPKM | LsoFree3 FPKM | LsoB1 FPKM | LsoB2 FPKM | LsoB3 FPKM | LsoA1 FPKM | LsoA2 FPKM | LsoA3 FPKM |
|------------------|---------|---------|----------------|---------------|---------------|---------------|---------------|---------------|---------------|------------|------------|------------|------------|------------|------------|
| Solyc01g110360.3 | 0.001   | 0.021   | -2.3           | 2150.17       | 1563.89       | 1983.19       | 1170.96       | 1293.94       | 882.98        | 542.15     | 488.38     | 407.35     | 360.65     | 254.2      | 193.25     |
| Solyc04g058150.3 | 0.003   | 0.029   | -2.31          | 781.51        | 698.98        | 725.49        | 444.11        | 775.09        | 329.55        | 206.32     | 123.67     | 65.72      | 218.91     | 138.05     | 111.17     |
| Solyc11g007860.1 | <0.001  | 0.001   | -2.31          | 57.25         | 49.61         | 52.08         | 60.61         | 70.32         | 63.34         | 19.31      | 15.25      | 14.98      | 12.03      | 11.61      | 10.93      |
| Solyc04g006950.3 | 0.034   | 0.119   | -2.32          | 25.64         | 7.35          | 23.45         | 4.23          | 9.69          | 2.73          | 0.29       | 1.19       | 0          | 1.97       | 2.28       | 0.42       |
| Solyc08g075880.3 | 0.001   | 0.022   | -2.32          | 15.84         | 13.45         | 9.39          | 25.94         | 21.32         | 17.5          | 2.42       | 2.35       | 0.98       | 4.08       | 4.37       | 4.48       |
| Solyc07g005210.3 | 0.001   | 0.02    | -2.33          | 208.69        | 149.62        | 142.87        | 84.98         | 217.78        | 88.26         | 71.66      | 55.77      | 45.13      | 34.33      | 38.69      | 22.02      |
| Solyc11g006290.2 | 0.002   | 0.023   | -2.33          | 5.11          | 6.87          | 7.65          | 1.97          | 8.52          | 2.81          | 1.12       | 0.3        | 0.47       | 0.36       | 0.17       | 0.05       |
| Solyc12g036793.1 | 0.043   | 0.137   | -2.34          | 18.75         | 3.83          | 10.75         | 4.43          | 31.2          | 4.58          | 6.94       | 0.55       | 7.35       | 3.28       | 2.77       | 0.76       |
| Solyc12g096130.2 | 0.001   | 0.018   | -2.34          | 12.9          | 16.03         | 14.46         | 13.5          | 18.85         | 20.06         | 6.29       | 4.06       | 5.7        | 1.37       | 2.04       | 1.87       |
| Solyc01g007810.1 | 0.006   | 0.042   | -2.37          | 10.57         | 28.84         | 16.9          | 27.06         | 14.81         | 28.92         | 8.18       | 2.38       | 0.85       | 3.43       | 2.73       | 2.32       |
| Solyc02g080510.1 | 0.007   | 0.047   | -2.39          | 38.87         | 37.55         | 56.63         | 17.64         | 75.4          | 17.23         | 19.54      | 12.89      | 6.01       | 8.43       | 9.13       | 5.29       |
| Solyc05g053850.3 | 0.045   | 0.141   | -2.39          | 48.39         | 58.63         | 43.38         | 6.73          | 46.32         | 14.46         | 14.07      | 10.83      | 6.44       | 19.36      | 4.94       | 2.22       |
| Solyc11g005290.1 | 0.007   | 0.046   | -2.4           | 6.89          | 6.97          | 4.28          | 19.88         | 16.37         | 15.2          | 3.17       | 5.06       | 0.46       | 4.96       | 2.31       | 2.42       |
| Solyc01g112190.3 | 0.001   | 0.017   | -2.41          | 13.46         | 7.48          | 15.53         | 5.91          | 11.75         | 4.88          | 1.56       | 2.21       | 1.5        | 1.68       | 1.93       | 0.4        |

| TomatoID         | p-value | q-value | DE in Infected | Control1 FPKM | Control2 FPKM | Control3 FPKM | LsoFree1 FPKM | LsoFree2 FPKM | LsoFree3 FPKM | LsoB1 FPKM | LsoB2 FPKM | LsoB3 FPKM | LsoA1 FPKM | LsoA2 FPKM | LsoA3 FPKM |
|------------------|---------|---------|----------------|---------------|---------------|---------------|---------------|---------------|---------------|------------|------------|------------|------------|------------|------------|
| Solyc07g006600.1 | 0.019   | 0.084   | -2.42          | 16.21         | 18.35         | 15.29         | 29.24         | 20.18         | 14.86         | 8.7        | 11.7       | 0.47       | 13.35      | 4.65       | 2.47       |
| Solyc07g045530.2 | 0.045   | 0.142   | -2.42          | 21.03         | 6.56          | 11.39         | 5.24          | 15.48         | 7.69          | 6.31       | 2.7        | 14.84      | 1.43       | 0.4        | 0.3        |
| Solyc10g079810.1 | 0.011   | 0.062   | -2.43          | 8.72          | 11.42         | 13.78         | 10.77         | 16.93         | 5.97          | 7.52       | 1.99       | 11.79      | 3.16       | 1.41       | 0.57       |
| Solyc03g045070.1 | 0.015   | 0.073   | -2.44          | 65.51         | 66.48         | 70.99         | 20.6          | 65.31         | 17.7          | 16.12      | 7.32       | 3.46       | 12.81      | 11.61      | 5.4        |
| Solyc03g065050.1 | <0.001  | 0.005   | -2.46          | 7.31          | 4.33          | 4.3           | 9.12          | 4.63          | 6.41          | 0          | 0.71       | 0.63       | 0.85       | 0.46       | 0.22       |
| Solyc05g007880.3 | 0.001   | 0.016   | -2.46          | 8.68          | 9.84          | 5.43          | 6.49          | 22.89         | 7.18          | 3.73       | 6.04       | 4.46       | 1.8        | 1.13       | 1.6        |
| Solyc09g065390.1 | <0.001  | 0.012   | -2.47          | 16.83         | 10.56         | 17.78         | 18.48         | 23.16         | 27.18         | 5.55       | 3.08       | 2.12       | 1.56       | 2.82       | 2.39       |
| Solyc12g088670.2 | <0.001  | 0.004   | -2.47          | 1341.04       | 772.98        | 1090.05       | 987.84        | 1550.13       | 1658.19       | 354.87     | 277.71     | 269.35     | 265.9      | 276.28     | 185.35     |
| Solyc12g099200.2 | 0.001   | 0.015   | -2.47          | 107.29        | 138.87        | 116.44        | 191.21        | 145.49        | 240.23        | 73.3       | 40.88      | 38.63      | 44.3       | 34.61      | 18.63      |
| Solyc11g008530.2 | 0.005   | 0.039   | -2.48          | 24.89         | 27.78         | 15.82         | 14.8          | 43.91         | 8.7           | 15.8       | 17.62      | 23.39      | 5.9        | 7.31       | 2.34       |
| Solyc12g036415.1 | 0.017   | 0.079   | -2.49          | 6.46          | 10.68         | 8.05          | 5.83          | 5.97          | 11.82         | 0          | 0          | 0          | 0          | 6.36       | 0          |
| Solyc01g049685.1 | <0.001  | <0.001  | -2.51          | 0             | 0             | 0             | 0             | 0             | 0             | 37.03      | 35.09      | 39.4       | 30.4       | 33.71      | 28         |
| Solyc01g049690.3 | <0.001  | <0.001  | -2.51          | 43.05         | 32.63         | 32.05         | 45.37         | 42.95         | 52.57         | 0.33       | 0.24       | 0.2        | 0.34       | 0.23       | 0.19       |

| TomatoID         | p-value | q-value | DE in Infected | Control1 FPKM | Control2 FPKM | Control3 FPKM | LsoFree1 FPKM | LsoFree2 FPKM | LsoFree3 FPKM | LsoB1 FPKM | LsoB2 FPKM | LsoB3 FPKM | LsoA1 FPKM | LsoA2 FPKM | LsoA3 FPKM |
|------------------|---------|---------|----------------|---------------|---------------|---------------|---------------|---------------|---------------|------------|------------|------------|------------|------------|------------|
| Solyc01g080870.3 | 0.004   | 0.036   | -2.51          | 8.73          | 18.31         | 8.85          | 5.71          | 14.34         | 3.67          | 3.55       | 5.04       | 1.55       | 6.02       | 1.82       | 0.45       |
| Solyc10g053880.1 | <0.001  | 0.004   | -2.52          | 9.65          | 8.05          | 8.52          | 5.87          | 6.21          | 6.14          | 0          | 0.46       | 1.03       | 0          | 0          | 0.39       |
| Solyc04g011495.1 | 0.033   | 0.116   | -2.53          | 13.6          | 14.28         | 12.91         | 13.86         | 13.72         | 14.88         | 0          | 8.83       | 0          | 0.34       | 0          | 4.41       |
| Solyc07g063420.3 | <0.001  | 0.014   | -2.53          | 12.86         | 7.48          | 12.37         | 8.42          | 9.29          | 20.05         | 1.64       | 1.37       | 2.33       | 0.6        | 1.27       | 0.32       |
| Solyc01g081060.3 | <0.001  | 0.014   | -2.54          | 300.86        | 250.69        | 348.98        | 305.91        | 367.2         | 398.98        | 152.47     | 98.65      | 114.22     | 73.45      | 57.56      | 37.48      |
| Solyc11g021130.1 | <0.001  | 0.001   | -2.54          | 72.9          | 71.04         | 111.18        | 94.14         | 53.84         | 113.05        | 8.97       | 11.58      | 8.8        | 10.27      | 11.01      | 10.45      |
| Solyc01g110580.2 | 0.001   | 0.017   | -2.55          | 26.96         | 41.13         | 24.09         | 32.71         | 22.28         | 18.39         | 10.17      | 5.12       | 2.08       | 5.37       | 3.4        | 3.02       |
| Solyc01g109800.2 | <0.001  | 0.006   | -2.56          | 17.41         | 16.44         | 7.75          | 22.95         | 34.54         | 13.49         | 6.21       | 6.27       | 2.83       | 4.82       | 6.26       | 3.74       |
| Solyc02g065220.3 | 0.002   | 0.027   | -2.56          | 64.79         | 63.49         | 67.53         | 25.85         | 68.32         | 35.12         | 24.52      | 10.88      | 10.58      | 11.44      | 9.76       | 4.6        |
| Solyc11g012690.2 | 0.002   | 0.026   | -2.56          | 40.36         | 30.17         | 48.01         | 25.38         | 24.35         | 15.27         | 7.88       | 4.86       | 3.29       | 9.29       | 4.9        | 1.96       |
| Solyc04g051470.1 | 0.002   | 0.026   | -2.57          | 15.45         | 17.25         | 17.94         | 27.51         | 29.93         | 28.13         | 18.93      | 11.78      | 8.2        | 14.69      | 10.44      | 1.19       |
| Solyc08g079430.3 | <0.001  | 0.005   | -2.59          | 29.84         | 11.91         | 22.13         | 17.1          | 27.97         | 17.11         | 4.67       | 4.82       | 3.42       | 3.9        | 4.37       | 2.04       |
| Solyc04g071780.3 | 0.005   | 0.042   | -2.6           | 95.75         | 22.71         | 52.63         | 41.73         | 29.66         | 42.22         | 6.4        | 7.8        | 16.32      | 3.95       | 9.35       | 2.94       |

| TomatoID         | p-value | q-value | DE in Infected | Control1 FPKM | Control2 FPKM | Control3 FPKM | LsoFree1 FPKM | LsoFree2 FPKM | LsoFree3 FPKM | LsoB1 FPKM | LsoB2 FPKM | LsoB3 FPKM | LsoA1 FPKM | LsoA2 FPKM | LsoA3 FPKM |
|------------------|---------|---------|----------------|---------------|---------------|---------------|---------------|---------------|---------------|------------|------------|------------|------------|------------|------------|
| Solyc01g080460.3 | 0.001   | 0.018   | -2.61          | 228.6         | 160.9         | 216.76        | 74.37         | 242.7         | 106.64        | 43.64      | 39.76      | 26.99      | 40.92      | 25.79      | 20.36      |
| Solyc07g065410.1 | 0.019   | 0.083   | -2.61          | 26.44         | 24.27         | 16.87         | 8.3           | 115.41        | 3.76          | 11.82      | 9.66       | 12.61      | 10.06      | 6.8        | 4.69       |
| Solyc12g087870.2 | 0.002   | 0.027   | -2.62          | 50.04         | 18.54         | 41.8          | 32.14         | 59.58         | 51.47         | 17.61      | 21.11      | 21.25      | 15.5       | 9.33       | 3.18       |
| Solyc05g012030.1 | 0.002   | 0.022   | -2.63          | 6.02          | 12.75         | 5.27          | 9.57          | 20.01         | 9.34          | 4.31       | 2.3        | 0.4        | 3.02       | 0.92       | 1.53       |
| Solyc01g104910.3 | <0.001  | 0.003   | -2.64          | 50.48         | 41.54         | 47.44         | 35.91         | 82.04         | 36.17         | 14.87      | 9.48       | 8.7        | 9.99       | 9.98       | 6.93       |
| Solyc01g107460.2 | 0.026   | 0.101   | -2.64          | 270.17        | 228.54        | 325.74        | 70.38         | 198.61        | 66.43         | 119.89     | 48.02      | 31.23      | 32.39      | 27.23      | 11.59      |
| Solyc04g011670.3 | <0.001  | 0.004   | -2.64          | 47.04         | 24.42         | 41.64         | 36.49         | 48.17         | 40.94         | 8.79       | 12.78      | 7.79       | 9.56       | 9.38       | 4.2        |
| Solyc05g013530.3 | <0.001  | 0.001   | -2.65          | 166.72        | 139.1         | 149.14        | 113.63        | 157.26        | 148.17        | 35.03      | 25.12      | 21.67      | 27.09      | 31.67      | 16.86      |
| Solyc05g041360.2 | <0.001  | 0.004   | -2.65          | 11.51         | 12.47         | 9.11          | 7.6           | 4.47          | 6.19          | 0.31       | 0.07       | 0.25       | 0.2        | 0.39       | 0          |
| Solyc08g074490.3 | <0.001  | 0.005   | -2.65          | 45.69         | 28.89         | 35.61         | 27.25         | 55.82         | 43.8          | 11.73      | 11.27      | 11.78      | 10.73      | 8.88       | 3.76       |
| Solyc09g061390.1 | <0.001  | 0.008   | -2.66          | 13.2          | 16.47         | 16.02         | 12.77         | 3.94          | 7.79          | 0.05       | 0.05       | 0.24       | 0.29       | 0.35       | 0.21       |
| Solyc11g073120.2 | <0.001  | 0.013   | -2.66          | 149.28        | 113.53        | 145.41        | 150.26        | 167.34        | 154.07        | 77.92      | 61.4       | 43.27      | 45.08      | 29.98      | 14.09      |
| Solyc10g078570.1 | <0.001  | 0.001   | -2.67          | 29.25         | 27.12         | 32.7          | 35.94         | 35.96         | 41.98         | 8.01       | 6.06       | 6.71       | 4.2        | 5.35       | 3.64       |

| TomatoID         | p-value | q-value | DE in Infected | Control1 FPKM | Control2 FPKM | Control3 FPKM | LsoFree1 FPKM | LsoFree2 FPKM | LsoFree3 FPKM | LsoB1 FPKM | LsoB2 FPKM | LsoB3 FPKM | LsoA1 FPKM | LsoA2 FPKM | LsoA3 FPKM |
|------------------|---------|---------|----------------|---------------|---------------|---------------|---------------|---------------|---------------|------------|------------|------------|------------|------------|------------|
| Solyc01g066260.2 | <0.001  | 0.012   | -2.71          | 14.44         | 8.83          | 13.12         | 6.69          | 16.89         | 11.74         | 2.93       | 0.6        | 1.76       | 1.4        | 1.76       | 0.38       |
| Solyc06g005330.3 | 0.024   | 0.096   | -2.71          | 67.03         | 46.94         | 103.55        | 80.75         | 25.08         | 33.66         | 31.65      | 10.58      | 3.19       | 12.24      | 7.32       | 2.07       |
| Solyc08g075570.3 | 0.028   | 0.106   | -2.72          | 26.75         | 3.51          | 17.58         | 1.64          | 13.34         | 1.62          | 0.19       | 0.21       | 0.15       | 0.12       | 0.07       | 0.05       |
| Solyc05g047440.1 | <0.001  | <0.001  | -2.75          | 5.98          | 9.02          | 6.37          | 7.49          | 5.74          | 6.28          | 0.15       | 0          | 0          | 0          | 0.39       | 0.1        |
| Solyc03g115920.3 | 0.011   | 0.062   | -2.77          | 48.47         | 46.05         | 24.74         | 17.71         | 101.13        | 11.03         | 21.16      | 12.22      | 42.67      | 11.24      | 7.16       | 4.23       |
| Solyc06g068500.3 | 0.012   | 0.066   | -2.77          | 52.23         | 32.41         | 38.72         | 153.87        | 99.11         | 240.9         | 17.58      | 10.36      | 5.21       | 12.96      | 16.56      | 15.27      |
| Solyc01g014250.2 | <0.001  | 0.001   | -2.78          | 8.86          | 8.09          | 11.76         | 13.23         | 10.87         | 13.52         | 1.73       | 1.49       | 1.68       | 0.97       | 1.01       | 0.4        |
| Solyc05g054750.3 | 0.002   | 0.026   | -2.78          | 2.79          | 9.35          | 5.02          | 9.63          | 9.09          | 17.25         | 2.42       | 1.9        | 1.36       | 0.33       | 0.47       | 0.18       |
| Solyc08g068850.3 | 0.018   | 0.081   | -2.78          | 4.12          | 4.31          | 2.43          | 2.08          | 30.18         | 0.75          | 2.45       | 5.46       | 13.63      | 1.49       | 0.43       | 0.32       |
| Solyc11g069450.1 | 0.001   | 0.018   | -2.8           | 57.71         | 54.74         | 51.83         | 109.77        | 120.78        | 135.04        | 33.62      | 18.77      | 11.03      | 10.63      | 11.7       | 13.74      |
| Solyc11g032190.1 | <0.001  | 0.001   | -2.84          | 5.42          | 7.34          | 6.77          | 9.88          | 10.27         | 6.24          | 0.99       | 0.74       | 1.05       | 2.28       | 1.16       | 0.12       |
| Solyc12g008380.1 | <0.001  | 0.007   | -2.86          | 14.07         | 14.01         | 12.81         | 8.62          | 25.77         | 13.59         | 4.67       | 2.18       | 1.84       | 2.28       | 1.11       | 1.04       |
| Solyc10g047090.2 | <0.001  | 0.002   | -2.87          | 48.67         | 56.46         | 38.68         | 34.68         | 16.73         | 52.49         | 1.56       | 1.99       | 2.65       | 1.58       | 1.95       | 3.13       |
| Solyc11g069940.1 | 0.006   | 0.043   | -2.87          | 62.35         | 36.76         | 69.05         | 18.3          | 111.04        | 16.83         | 13.98      | 12.4       | 17.15      | 9.16       | 5.44       | 4.72       |

| TomatoID         | p-value | q-value | DE in Infected | Control1 FPKM | Control2 FPKM | Control3 FPKM | LsoFree1 FPKM | LsoFree2 FPKM | LsoFree3 FPKM | LsoB1 FPKM | LsoB2 FPKM | LsoB3 FPKM | LsoA1 FPKM | LsoA2 FPKM | LsoA3 FPKM |
|------------------|---------|---------|----------------|---------------|---------------|---------------|---------------|---------------|---------------|------------|------------|------------|------------|------------|------------|
| Solyc05g005870.3 | 0.001   | 0.015   | -2.88          | 52.76         | 50.93         | 62.25         | 38.49         | 48.53         | 44.42         | 17.19      | 14.59      | 9.64       | 14.33      | 10.64      | 2.44       |
| Solyc10g047390.1 | <0.001  | <0.001  | -2.92          | 8             | 9.67          | 7.25          | 10.69         | 4.49          | 7.66          | 0          | 0          | 0          | 0          | 0          | 0          |
| Solyc09g008200.3 | <0.001  | 0.006   | -2.95          | 207.91        | 112.49        | 192.47        | 152.68        | 137.55        | 158.8         | 38.58      | 21.24      | 23.04      | 15.4       | 22.57      | 12.19      |
| Solyc11g021240.2 | <0.001  | <0.001  | -2.95          | 7.34          | 7.39          | 8.85          | 8.99          | 6.02          | 6.07          | 0          | 0          | 0          | 0.25       | 0          | 0          |
| Solyc05g026460.1 | <0.001  | 0.005   | -2.96          | 7.66          | 8.36          | 6.12          | 9.16          | 14.34         | 17.3          | 1.86       | 0.97       | 1.65       | 0.86       | 0.41       | 0.45       |
| Solyc06g005320.1 | 0.015   | 0.073   | -3.02          | 33.67         | 15.71         | 47.23         | 25.02         | 11.81         | 13.48         | 7.27       | 8.5        | 0.74       | 4.34       | 2.1        | 0.07       |
| Solyc06g066530.1 | <0.001  | 0.004   | -3.14          | 31.65         | 36.73         | 22.83         | 19.54         | 23.61         | 41.01         | 4.22       | 3.35       | 2.08       | 2.22       | 1.58       | 1.48       |
| Solyc11g056500.2 | <0.001  | <0.001  | -3.21          | 7.06          | 10.67         | 6.96          | 10.63         | 10.63         | 10.05         | 0          | 0.13       | 0.55       | 0.4        | 0.64       | 0.25       |
| Solyc12g035550.1 | <0.001  | 0.001   | -3.21          | 5.54          | 10.53         | 11.46         | 10.66         | 7.59          | 5.54          | 0          | 0          | 0          | 0          | 0          | 0          |
| Solyc08g079230.1 | 0.036   | 0.124   | -3.32          | 311.12        | 18            | 139.8         | 17.46         | 58.1          | 17.48         | 3.2        | 11.13      | 6.3        | 8.62       | 2.21       | 1.92       |
| Solyc09g009130.3 | 0.001   | 0.017   | -3.32          | 396.93        | 270.5         | 443.73        | 237.28        | 313.96        | 296.44        | 96.62      | 37.68      | 63.02      | 29.51      | 21.55      | 17.47      |
| Solyc08g016000.1 | <0.001  | <0.001  | -3.35          | 11.93         | 12.8          | 12.94         | 13.4          | 7.24          | 9.64          | 0          | 0.06       | 0.09       | 0          | 0          | 0          |

| TomatoID         | p-value | q-value | DE in Infected | Control1 FPKM | Control2 FPKM | Control3 FPKM | LsoFree1 FPKM | LsoFree2 FPKM | LsoFree3 FPKM | LsoB1 FPKM | LsoB2 FPKM | LsoB3 FPKM | LsoA1 FPKM | LsoA2 FPKM | LsoA3 FPKM |
|------------------|---------|---------|----------------|---------------|---------------|---------------|---------------|---------------|---------------|------------|------------|------------|------------|------------|------------|
| Solyc07g006310.1 | 0.002   | 0.023   | -3.43          | 4.58          | 23.54         | 9.78          | 24.45         | 20.59         | 4.37          | 2.14       | 0.18       | 0.27       | 1.52       | 0.96       | 0.9        |
| Solyc09g010530.3 | 0.002   | 0.025   | -3.57          | 34.28         | 31.15         | 31.49         | 33.03         | 39.7          | 7.66          | 10.78      | 7.66       | 2.8        | 14.16      | 3.14       | 0.69       |
| Solyc11g021300.1 | <0.001  | <0.001  | -3.62          | 12.35         | 14.68         | 13.18         | 13.11         | 10            | 11.87         | 0          | 0.01       | 0.06       | 0          | 0          | 0          |
| Solyc11g021260.1 | <0.001  | <0.001  | -3.66          | 12.91         | 13.87         | 13.24         | 16.27         | 9.47          | 10.61         | 0          | 0          | 0          | 0          | 0          | 0          |
| Solyc06g005310.3 | 0.004   | 0.034   | -3.7           | 62.16         | 27.64         | 78.02         | 44.4          | 21.8          | 26.6          | 9.43       | 6.58       | 1.32       | 4.61       | 2.22       | 0.13       |
| Solyc01g086660.2 | 0.003   | 0.029   | -3.72          | 49.61         | 54.34         | 17.05         | 16.95         | 62.95         | 7.07          | 6.29       | 12.99      | 20.62      | 8.59       | 2.92       | 1.06       |
| Solyc11g021290.2 | <0.001  | <0.001  | -3.91          | 14.81         | 17.45         | 18.5          | 21.92         | 11.29         | 12.92         | 0          | 0          | 0.05       | 0          | 0.09       | 0          |
| Solyc08g065610.3 | <0.001  | 0.008   | -4.03          | 882.3         | 279.33        | 589.81        | 299.44        | 745.37        | 1105.08       | 48.57      | 46.75      | 48.75      | 42.42      | 43.16      | 22.91      |
| Solyc10g049470.1 | <0.001  | <0.001  | -4.08          | 18.78         | 19.52         | 21.34         | 24.45         | 12.53         | 15.32         | 0          | 0          | 0          | 0          | 0          | 0          |
| Solyc01g109090.2 | 0.001   | 0.016   | -4.12          | 167.44        | 74.65         | 145.01        | 358.66        | 313.83        | 493.43        | 40.43      | 24.95      | 42.31      | 18.38      | 12.44      | 10.64      |
| Solyc11g021280.1 | <0.001  | <0.001  | -4.23          | 22.2          | 19.6          | 28.99         | 31.15         | 14.04         | 17.95         | 0          | 0          | 0.2        | 0          | 0          | 0          |

| TomatoID         | p-value | q-value | DE in Infected | Control1 FPKM | Control2 FPKM | Control3 FPKM | LsoFree1 FPKM | LsoFree2 FPKM | LsoFree3 FPKM | LsoB1 FPKM | LsoB2 FPKM | LsoB3 FPKM | LsoA1 FPKM | LsoA2 FPKM | LsoA3 FPKM |
|------------------|---------|---------|----------------|---------------|---------------|---------------|---------------|---------------|---------------|------------|------------|------------|------------|------------|------------|
| Solyc11g021270.1 | <0.001  | <0.001  | -4.71          | 32.56         | 29.46         | 41.88         | 53.3          | 17.16         | 23.2          | 0          | 0          | 0          | 0          | 0          | 0          |
| Solyc04g054745.1 | <0.001  | 0.001   | -4.97          | 43.73         | 49.55         | 61.38         | 27.1          | 32.09         | 13.42         | 0          | 0          | 0          | 0          | 0          | 0          |
| Solyc09g065790.1 | <0.001  | <0.001  | -5.14          | 113.64        | 99.57         | 153.11        | 235.36        | 84.75         | 184.47        | 1.01       | 1.45       | 2.79       | 2.36       | 2.34       | 2.67       |
| Solyc09g064580.2 | <0.001  | <0.001  | -5.99          | 46.87         | 67.59         | 82.83         | 84.15         | 56.09         | 105.86        | 0          | 0          | 0          | 0          | 0          | 0          |
| Solyc01g017220.1 | <0.001  | <0.001  | -6.05          | 1691.72       | 2005.67       | 2520.6        | 2479.06       | 865.06        | 1715.53       | 13.46      | 11.51      | 9.5        | 17.54      | 16.97      | 21.32      |
| Solyc04g039850.1 | <0.001  | <0.001  | -6.4           | 581.67        | 761.08        | 842.23        | 686.51        | 284.76        | 577.12        | 2.29       | 2.59       | 1.72       | 3.75       | 3.02       | 4.86       |
| Solyc06g007515.1 | 0.012   | 0.066   | -6.81          | 63.2          | 0             | 0.08          | 171.68        | 139.06        | 0             | 0          | 0          | 0          | 0          | 0          | 0          |

| TomatoID         | NCBI Protein Name                                   | Gene ID  | <i>A. Thaliana</i> Homolog | Uniprot Description                                                                           | Putative Consequences for Infection                                                          | Citation                                                                                                                                                                                                                                        |
|------------------|-----------------------------------------------------|----------|----------------------------|-----------------------------------------------------------------------------------------------|----------------------------------------------------------------------------------------------|-------------------------------------------------------------------------------------------------------------------------------------------------------------------------------------------------------------------------------------------------|
| Solyc03g098790.3 | cathepsin D inhibitor protein precursor             | cathDInh | N/A                        | Endopeptidase inhibitor activity                                                              | N/A                                                                                          | N/A                                                                                                                                                                                                                                             |
| Solyc00g068980.2 | N/A                                                 | N/A      | N/A                        | N/A                                                                                           | N/A                                                                                          | N/A                                                                                                                                                                                                                                             |
| Solyc12g010020.2 | leucine aminopeptidase 1, chloroplastic             | LAPA1    | AT2G24200                  | Involved in the processing and regular turnover of intracellular proteins                     | Increased intracellular protein turnover                                                     | Pautot, Veronique, et al. "Leucine aminopeptidase: an inducible component of the defense response in <i>Lycopersicon esculentum</i> (tomato)." <i>Proceedings of the National Academy of Sciences</i> 90.21 (1993): 9906-9910.                  |
| Solyc00g187050.3 | leucine aminopeptidase 1, chloroplastic             | LAPA1    | AT2G24200                  | Involved in the processing and regular turnover of intracellular proteins                     | Increased intracellular protein turnover                                                     | Pautot, Veronique, et al. "Leucine aminopeptidase: an inducible component of the defense response in <i>Lycopersicon esculentum</i> (tomato)." <i>Proceedings of the National Academy of Sciences</i> 90.21 (1993): 9906-9910.                  |
| Solyc12g010025.1 | N/A                                                 | N/A      | N/A                        | N/A                                                                                           | N/A                                                                                          | N/A                                                                                                                                                                                                                                             |
| Solyc12g010030.2 | leucine aminopeptidase 2, chloroplastic isoform X1  | LAP2     | AT4G30920                  | Involved in the processing and regular turnover of intracellular proteins; Heat shock protein | Increased turnover of intracellular proteins; Increased protection from heat-induced damaged | Waditee-Sirisattha, Rungaroon, et al. "The <i>Arabidopsis</i> aminopeptidase LAP2 regulates plant growth, leaf longevity and stress response." <i>New Phytologist</i> 191.4 (2011): 958-969.                                                    |
| Solyc09g089530.3 | proteinase inhibitor 1-like                         | N/A      | N/A                        | N/A                                                                                           | N/A                                                                                          | N/A                                                                                                                                                                                                                                             |
| Solyc09g084470.3 | wound-induced proteinase inhibitor 1 precursor      | N/A      | N/A                        | Inhibits both chymotrypsin and trypsin, suppressing protein digestion by herbivores           | Increased defense against herbivory                                                          | Cleveland, Thomas E., Robert W. Thornburg, and Clarence A. Ryan. "Molecular characterization of a wound-inducible inhibitor I gene from potato and the processing of its mRNA and protein." <i>Plant molecular biology</i> 8.3 (1987): 199-207. |
| Solyc09g084480.3 | wound-induced proteinase inhibitor 1-like           | N/A      | N/A                        | Inhibits both chymotrypsin and trypsin, suppressing protein digestion by herbivores           | Increased defense against herbivory                                                          | Cleveland, Thomas E., Robert W. Thornburg, and Clarence A. Ryan. "Molecular characterization of a wound-inducible inhibitor I gene from potato and the processing of its mRNA and protein." <i>Plant molecular biology</i> 8.3 (1987): 199-207. |
| Solyc09g084490.3 | wound-induced proteinase inhibitor 1-like           | N/A      | N/A                        | Inhibits both chymotrypsin and trypsin, suppressing protein digestion by herbivores           | Increased defense against herbivory                                                          | Cleveland, Thomas E., Robert W. Thornburg, and Clarence A. Ryan. "Molecular characterization of a wound-inducible inhibitor I gene from potato and the processing of its mRNA and protein." <i>Plant molecular biology</i> 8.3 (1987): 199-207. |
| Solyc08g074630.2 | polyphenol oxidase F, chloroplastic                 | N/A      | N/A                        | Catalyzes the oxidation of mono- and o-diphenols to o-quinones                                | N/A                                                                                          | Newman, Sally M., et al. "Organisation of the tomato polyphenol oxidase gene family." <i>Plant molecular biology</i> 21.6 (1993): 1035-1051.                                                                                                    |
| Solyc01g095140.3 | ethylene-responsive late embryogenesis-like protein | ER5      | N/A                        | Involved in response to desiccation                                                           | Increased response to drought                                                                | Zegzouti, Hicham, et al. "ER5, a tomato cDNA encoding an ethylene-responsive LEA-like protein: characterization and expression in response to drought, ABA and wounding." <i>Plant molecular biology</i> 35.6 (1997): 847-854.                  |

| TomatoID         | NCBI Protein Name                                                  | Gene ID      | <i>A. Thaliana</i> Homolog | Uniprot Description                                                                                                          | Putative Consequences for Infection           | Citation                                                                                                                                                                                                                                                                                             |
|------------------|--------------------------------------------------------------------|--------------|----------------------------|------------------------------------------------------------------------------------------------------------------------------|-----------------------------------------------|------------------------------------------------------------------------------------------------------------------------------------------------------------------------------------------------------------------------------------------------------------------------------------------------------|
| Solyc03g098780.2 | aspartic protease inhibitor 1                                      | N/A          | N/A                        | Inhibitor of cathepsin D; Protects the plant by inhibiting proteases of invading organisms                                   | Increased defense against herbivory           | Ishikawa, Atsushi, et al. "A family of potato genes that encode Kunitz-type proteinase inhibitors: structural comparisons and differential expression." <i>Plant and cell physiology</i> 35.2 (1994): 303-312.                                                                                       |
| Solyc09g083440.3 | wound-induced proteinase inhibitor 1                               | N/A          | N/A                        | Inhibits both chymotrypsin and trypsin, suppressing protein digestion by herbivores                                          | Increased defense against herbivory           | Cleveland, Thomas E., Robert W. Thornburg, and Clarence A. Ryan. "Molecular characterization of a wound-inducible inhibitor I gene from potato and the processing of its mRNA and protein." <i>Plant molecular biology</i> 8.3 (1987): 199-207.                                                      |
| Solyc06g062370.3 | Glucose-1-phosphate adenyltransferase small subunit, chloroplastic | APS1         | AT5G48300                  | Plays a role in starch synthesis; Catalyzes the synthesis of the activated glycosyl donor, ADP-glucose from Glc-1-P, and ATP | Increased starch synthesis                    | Tanaka, Hiroshi, et al. "Isolation and some properties of acid phosphatase-11 from tomato leaves." <i>Agricultural and biological chemistry</i> 54.8 (1990): 1947-1952.                                                                                                                              |
| Solyc09g084450.3 | transcription factor bHLH92 isoform X1                             | BHLH92       | AT5G43650                  | Involved in regulation of transcription                                                                                      | N/A                                           | Jiang, Yuanqing, Bo Yang, and Michael K. Deyholos. "Functional characterization of the Arabidopsis bHLH92 transcription factor in abiotic stress." <i>Molecular Genetics and Genomics</i> 282.5 (2009): 503-516.                                                                                     |
| Solyc09g089520.3 | proteinase inhibitor I-B-like                                      | LOC107794480 | N/A                        | Involved in response to wounding                                                                                             | Promoted response to wounding                 | Sierra, Nicolas, et al. "The tobacco genome sequence and its comparison with those of tomato and potato." <i>Nature communications</i> 5.1 (2014): 1-9.                                                                                                                                              |
| Solyc09g008670.3 | threonine deaminase                                                | N/A          | N/A                        | Involved in cellular amino acid biosynthetic process                                                                         | N/A                                           | Tieman, Denise M., and Avtar K. Handa. "Molecular cloning and characterization of genes expressed during early tomato ( <i>Lycopersicon esculentum</i> Mill.) fruit development by mRNA differential display." <i>Journal of the American Society for Horticultural Science</i> 121.1 (1996): 52-56. |
| Solyc12g096780.2 | enoyl-[acyl-carrier-protein] reductase, mitochondrial-like         | AT3G45770    | AT3G45770                  | Catalyzes the NADPH-dependent reduction of trans-2-enoyl thioesters in mitochondrial fatty acid synthesis                    | Increased fatty acid synthesis and metabolism | Li-Beisson, Yonghua, et al. "Acyl-lipid metabolism." <i>The Arabidopsis book/American Society of Plant Biologists</i> 11 (2013).                                                                                                                                                                     |
| Solyc07g007250.3 | metallocarboxypeptidase inhibitor IIa precursor                    | N/A          | N/A                        | Carboxypeptidase and endopeptidase inhibitor activity                                                                        | N/A                                           | N/A                                                                                                                                                                                                                                                                                                  |
| Solyc09g089505.1 | N/A                                                                | N/A          | N/A                        | N/A                                                                                                                          | N/A                                           | N/A                                                                                                                                                                                                                                                                                                  |
| Solyc09g089510.3 | proteinase inhibitor I-B                                           | LOC107794480 | N/A                        | Involved in response to wounding                                                                                             | Promoted response to wounding                 | Sierra, Nicolas, et al. "The tobacco genome sequence and its comparison with those of tomato and potato." <i>Nature communications</i> 5.1 (2014): 1-9.                                                                                                                                              |
| Solyc11g027770.1 | N/A                                                                | N/A          | N/A                        | N/A                                                                                                                          | N/A                                           | N/A                                                                                                                                                                                                                                                                                                  |
| Solyc07g008570.3 | probable inactive purple acid phosphatase 27                       | PAP27        | AT5G50400                  | Acid phosphatase activity; Metal ion binding                                                                                 | N/A                                           | Cheng, Chia-Yi, et al. "Araport11: a complete reannotation of the Arabidopsis thaliana reference genome." <i>The Plant Journal</i> 89.4 (2017): 789-804.                                                                                                                                             |

| TomatoID         | NCBI Protein Name                           | Gene ID | <i>A. Thaliana</i> Homolog | Uniprot Description                                                                                                                                  | Putative Consequences for Infection                                                                                     | Citation                                                                                                                                                                                                     |
|------------------|---------------------------------------------|---------|----------------------------|------------------------------------------------------------------------------------------------------------------------------------------------------|-------------------------------------------------------------------------------------------------------------------------|--------------------------------------------------------------------------------------------------------------------------------------------------------------------------------------------------------------|
| Solyc11g021060.2 | proteinase inhibitor type-2 TR8 precursor   | ARPI    | N/A                        | Serine-type endopeptidase inhibitor activity                                                                                                         | N/A                                                                                                                     | Taylor, Brian H., Roger J. Young, and Chantel F. Scheuring. "Induction of a proteinase inhibitor II-class gene by auxin in tomato roots." <i>Plant molecular biology</i> 23.5 (1993): 1005-1014.             |
| Solyc01g091170.3 | Arginase 2, chloroplastic/mitochondrial     | ARGAH2  | AT4G08870                  | Utilized in the urea cycle; Precursor for the synthesis of both polyamines and proline; Catalyzes the formation of putrescine from agmatine          | Promoted jasmonate-related functions; Increased urea waste management; Increased freezing tolerance                     | Dombrecht, Bruno, et al. "MYC2 differentially modulates diverse jasmonate-dependent functions in Arabidopsis." <i>The Plant Cell</i> 19.7 (2007): 2225-2245.                                                 |
| Solyc01g017490.1 | N/A                                         | N/A     | N/A                        | N/A                                                                                                                                                  | N/A                                                                                                                     | N/A                                                                                                                                                                                                          |
| Solyc06g083900.3 | transcription factor MYB13-like             | MYB13   | AT1G06180                  | Component of a regulatory network controlling the establishment and/or development of the shoot system by the regulation of apical meristem function | Increased establishment and/or development of the shoot system by the regulation of apical meristem function            | Kirik, Victor, et al. "Ectopic expression of a novel MYB gene modifies the architecture of the Arabidopsis inflorescence." <i>The Plant Journal</i> 13.6 (1998): 729-742.                                    |
| Solyc07g064600.3 | inducible plastid-lipid associated protein  | CHRD    | N/A                        | Involved in organonitrogen compound catabolic process                                                                                                | N/A                                                                                                                     | N/A                                                                                                                                                                                                          |
| Solyc12g010980.2 | acetyl-CoA-benzylalcohol acetyltransferase  | BEAT    | N/A                        | Involved in the biosynthesis of benzyl acetate, a major constituent of the floral scent                                                              | Increased synthesis of benzyl acetate                                                                                   | Dudareva, Natalia, et al. "Acetyl-CoA: benzylalcohol acetyltransferase—an enzyme involved in floral scent production in <i>Clarkia breweri</i> ." <i>The Plant Journal</i> 14.3 (1998): 297-304.             |
| Solyc11g051200.1 | N/A                                         | N/A     | N/A                        | N/A                                                                                                                                                  | N/A                                                                                                                     | N/A                                                                                                                                                                                                          |
| Solyc11g071480.1 | agmatine hydroxycinnamoyltransferase 1-like | AHT1    | AT3G61600                  | Promotes the synthesis of hydroxycinnamic acid amides, which play a role in defense against pathogens                                                | Increased defense against pathogens                                                                                     | Chen, Wei, et al. "Genome-wide association analyses provide genetic and biochemical insights into natural variation in rice metabolism." <i>Nature genetics</i> 46.7 (2014): 714-721.                        |
| Solyc01g006400.3 | Hop-interacting protein TH101 precursor     | N/A     | N/A                        | Transcriptional activator                                                                                                                            | N/A                                                                                                                     | N/A                                                                                                                                                                                                          |
| Solyc12g009220.2 | jasmonate ZIM-domain protein 2              | NtJAZ2  | N/A                        | Involved in regulation of defense response; Involved in regulation of JA-mediated signaling pathway; Involved in response to wounding                | Increased regulation of defense response; Increased regulation of JA-mediated signaling; Increased response to wounding | Shoji, Tsubasa, Takayuki Ogawa, and Takashi Hashimoto. "Jasmonate-induced nicotine formation in tobacco is mediated by tobacco COI1 and JAZ genes." <i>Plant and cell physiology</i> 49.7 (2008): 1003-1012. |
| Solyc01g017050.1 | N/A                                         | N/A     | N/A                        | N/A                                                                                                                                                  | N/A                                                                                                                     | N/A                                                                                                                                                                                                          |
| Solyc11g022590.1 | uncharacterized protein LOC544001 precursor | N/A     | N/A                        | N/A                                                                                                                                                  | N/A                                                                                                                     | N/A                                                                                                                                                                                                          |

| TomatoID         | NCBI Protein Name                                                  | Gene ID   | <i>A. Thaliana</i> Homolog | Uniprot Description                                                                                                                                                                                                                                                                                      | Putative Consequences for Infection                                                                                                                                                                                    | Citation                                                                                                                                                                                                                                                 |
|------------------|--------------------------------------------------------------------|-----------|----------------------------|----------------------------------------------------------------------------------------------------------------------------------------------------------------------------------------------------------------------------------------------------------------------------------------------------------|------------------------------------------------------------------------------------------------------------------------------------------------------------------------------------------------------------------------|----------------------------------------------------------------------------------------------------------------------------------------------------------------------------------------------------------------------------------------------------------|
| Solyc06g076020.3 | heat shock cognate 70 kDa protein 1                                | HSP70-1   | AT5G02500                  | Facilitates folding of de novo proteins, assists translocation of precursor proteins into organelles; Degrades damaged protein under stress conditions; Involved in defense response; Involved in protein transport to chloroplasts; Modulates stomatal aperture in response to environmental conditions | Increased protein folding; Increased translocation of precursor proteins into organelles; Increased degradation of damaged proteins; Promoted defense response; Increased response to abiotic stress and ABA signaling | Sung, Dong Yul, and Charles L. Guy. "Physiological and molecular assessment of altered expression of Hsc70-1 in Arabidopsis. Evidence for pleiotropic consequences." <i>Plant Physiology</i> 132.2 (2003): 979-987.                                      |
| Solyc02g081980.3 | apyrase isoform X1                                                 | RROP1     | N/A                        | Catalyzes the hydrolysis of phosphoanhydride bonds of nucleoside tri- and di-phosphates                                                                                                                                                                                                                  | N/A                                                                                                                                                                                                                    | Handa, Masahisa, and Guido Guidotti. "Purification and cloning of a soluble ATP-diphosphohydrolase (apyrase) from potato tubers ( <i>Solanum tuberosum</i> )." <i>Biochemical and biophysical research communications</i> 218.3 (1996): 916-923.         |
| Solyc01g060020.3 | glucan endo-1,3-beta-glucosidase B precursor                       | N/A       | N/A                        | Involved in plant defense against pathogens                                                                                                                                                                                                                                                              | Increased defense against pathogens                                                                                                                                                                                    | van Kan, Jan AL, et al. "Differential accumulation of mRNAs encoding extracellular and intracellular PR proteins in tomato induced by virulent and avirulent races of <i>Cladosporium fulvum</i> ." <i>Plant molecular biology</i> 20.3 (1992): 513-527. |
| Solyc10g005320.3 | tryptophan synthase beta chain 1-like                              | TSB1      | AT5G54810                  | The beta subunit is responsible for the synthesis of L-tryptophan from indole and L-serine                                                                                                                                                                                                               | Increased synthesis of L-tryptophan from indole and L-serine                                                                                                                                                           | Ouyang, Jian, Xiang Shao, and Jiayang Li. "Indole-3-glycerol phosphate, a branchpoint of indole-3-acetic acid biosynthesis from the tryptophan biosynthetic pathway in <i>Arabidopsis thaliana</i> ." <i>The Plant Journal</i> 24.3 (2000): 327-334.     |
| Solyc12g096770.1 | acetyl-CoA-benzylalcohol acetyltransferase-like                    | BEAT      | N/A                        | Involved in the biosynthesis of benzyl acetate, a major constituent of the floral scent                                                                                                                                                                                                                  | Increased synthesis of benzyl acetate                                                                                                                                                                                  | Dudareva, Natalia, et al. "Acetyl-CoA: benzylalcohol acetyltransferase—an enzyme involved in floral scent production in <i>Clarkia breweri</i> ." <i>The Plant Journal</i> 14.3 (1998): 297-304.                                                         |
| Solyc02g093180.3 | uncharacterized acetyltransferase At3g50280                        | AT3G50280 | AT3G50280                  | N/A                                                                                                                                                                                                                                                                                                      | N/A                                                                                                                                                                                                                    | N/A                                                                                                                                                                                                                                                      |
| Solyc04g077980.1 | C2H2-type zinc finger protein                                      | At4g35610 | At4g35610                  | Transcription factor activity                                                                                                                                                                                                                                                                            | Promoted transcription regulation                                                                                                                                                                                      | Cheng, Chia-Yi, et al. "Araport11: a complete reannotation of the <i>Arabidopsis thaliana</i> reference genome." <i>The Plant Journal</i> 89.4 (2017): 789-804.                                                                                          |
| Solyc07g040960.1 | <i>Solanum lycopersicum</i> salt responsive protein 2 (SRG2), mRNA | SRG2      | N/A                        | N/A                                                                                                                                                                                                                                                                                                      | N/A                                                                                                                                                                                                                    | N/A                                                                                                                                                                                                                                                      |
| Solyc11g071740.2 | putative calcium-binding protein CML19                             | CML19     | N/A                        | Calcium sensor                                                                                                                                                                                                                                                                                           | Promoted calcium sensing                                                                                                                                                                                               | Boonburapong, Bongkoj, and Teerapong Buaboocha. "Genome-wide identification and analyses of the rice calmodulin and related potential calcium sensor proteins." <i>BMC plant biology</i> 7.1 (2007): 4.                                                  |

| TomatoID         | NCBI Protein Name                                      | Gene ID   | <i>A. Thaliana</i> Homolog | Uniprot Description                                                                                                                                                           | Putative Consequences for Infection                                        | Citation                                                                                                                                                                                                                                                      |
|------------------|--------------------------------------------------------|-----------|----------------------------|-------------------------------------------------------------------------------------------------------------------------------------------------------------------------------|----------------------------------------------------------------------------|---------------------------------------------------------------------------------------------------------------------------------------------------------------------------------------------------------------------------------------------------------------|
| Solyc03g116890.3 | probable WRKY transcription factor 40 isoform X1       | WRKY40    | AT1G80840                  | Transcription factor                                                                                                                                                          | N/A                                                                        | Eulgem, Thomas, et al. "The WRKY superfamily of plant transcription factors." Trends in plant science 5.5 (2000): 199-206.                                                                                                                                    |
| Solyc04g074770.2 | uncharacterized protein LOC101267111                   | N/A       | N/A                        | N/A                                                                                                                                                                           | N/A                                                                        | N/A                                                                                                                                                                                                                                                           |
| Solyc11g011030.2 | Pto-responsive gene 1 protein                          | PTI1      | N/A                        | A serine-threonine kinase involved in the hypersensitive response-mediated signaling cascade                                                                                  | Promoted hypersensitive response-mediated signaling                        | Zhou, Jianmin, et al. "The tomato gene Pti1 encodes a serine/threonine kinase that is phosphorylated by Pto and is involved in the hypersensitive response." Cell 83.6 (1995): 925-935.                                                                       |
| Solyc09g010980.1 | laccase-17                                             | LAC17     | AT5G60020                  | Involved in lignin degradation and detoxification of lignin-derived products                                                                                                  | Increased lignin degradation and detoxification of lignin-derived products | Sibout, Richard, et al. "CINNAMYL ALCOHOL DEHYDROGENASE-C and -D are the primary genes involved in lignin biosynthesis in the floral stem of Arabidopsis." The Plant Cell 17.7 (2005): 2059-2076.                                                             |
| Solyc04g079730.1 | allene oxide synthase                                  | CYP74A    | AT5G42650                  | Involved in the synthesis of JA                                                                                                                                               | Increased production of JA                                                 | Laudert, Dietmar, et al. "Cloning, molecular and functional characterization of Arabidopsis thaliana allene oxide synthase (CYP 74), the first enzyme of the octadecanoid pathway to jasmonates." Plant molecular biology 31.2 (1996): 323-335.               |
| Solyc03g098760.2 | serine protease inhibitor 5-like                       | SCPL5     | AT1G73290                  | Carboxypeptidase                                                                                                                                                              | N/A                                                                        | N/A                                                                                                                                                                                                                                                           |
| Solyc11g018777.1 | N/A                                                    | N/A       | N/A                        | N/A                                                                                                                                                                           | N/A                                                                        | N/A                                                                                                                                                                                                                                                           |
| Solyc00g012430.1 | N/A                                                    | N/A       | N/A                        | N/A                                                                                                                                                                           | N/A                                                                        | N/A                                                                                                                                                                                                                                                           |
| Solyc02g090970.1 | mitogen-activated protein kinase kinase kinase 17-like | MAPKKK17  | AT2G32510                  | Act as ABA signal transducer under abiotic stress                                                                                                                             | Increased response to stress                                               | Danquah, Agyemang, et al. "Identification and characterization of an ABA-activated MAP kinase cascade in Arabidopsis thaliana." The Plant Journal 82.2 (2015): 232-244.                                                                                       |
| Solyc03g098730.1 | kunitz trypsin inhibitor 2                             | KTI2      | AT1G72290                  | Involved in the control of cell death in the transmitting tract and septum epidermis during flower development; Plays a role in herbivore resistance during seedling greening | Increased programmed cell death; Increased defense against herbivores      | Shoji, Tsubasa, Takayuki Ogawa, and Takashi Hashimoto. "Jasmonate-induced nicotine formation in tobacco is mediated by tobacco COI1 and JAZ genes." Plant and cell physiology 49.7 (2008): 1003-1012.                                                         |
| Solyc06g066800.2 | protein CDI                                            | AT1G64980 | AT1G64980                  | Nucleotide-diphospho-sugar transferase required for pollen germination and tube growth                                                                                        | Promoted pollen germination and tube growth                                | Li, Hong-Mei, et al. "Cdi gene is required for pollen germination and tube growth in Arabidopsis." FEBS letters 586.7 (2012): 1027-1031.                                                                                                                      |
| Solyc07g056000.2 | xyloglycan endo-transglycosylase precursor             | XET1      | N/A                        | Involved in carbohydrate metabolic process                                                                                                                                    | Increased carbohydrate metabolism                                          | Tucker, Mark L., et al. "Gene expression profiles for cell wall-modifying proteins associated with soybean cyst nematode infection, petiole abscission, root tips, flowers, apical buds, and leaves." Journal of Experimental Botany 58.12 (2007): 3395-3406. |

| TomatoID         | NCBI Protein Name                    | Gene ID      | <i>A. Thaliana</i> Homolog | Uniprot Description                                                                                                                                                         | Putative Consequences for Infection                                              | Citation                                                                                                                                                                                                                                          |
|------------------|--------------------------------------|--------------|----------------------------|-----------------------------------------------------------------------------------------------------------------------------------------------------------------------------|----------------------------------------------------------------------------------|---------------------------------------------------------------------------------------------------------------------------------------------------------------------------------------------------------------------------------------------------|
| Solyc02g083880.3 | gibberellin-regulated protein 11     | GASA11       | AT2G18420                  | Gibberellin-regulated protein that functions in hormonal controlled steps of reproductive development                                                                       | Promoted plant development                                                       | Cheng, Chia-Yi, et al. "Araport11: a complete reannotation of the Arabidopsis thaliana reference genome." <i>The Plant Journal</i> 89.4 (2017): 789-804.                                                                                          |
| Solyc07g042170.3 | protein TIFY 10b-like                | AT1G74950    | AT1G74950                  | Repressor of jasmonate responses; Negatively regulates root hair development                                                                                                | Repressed jasmonate responses; Impaired root hair development                    | Fernández-Calvo, Patricia, et al. "The Arabidopsis bHLH transcription factors MYC3 and MYC4 are targets of JAZ repressors and act additively with MYC2 in the activation of jasmonate responses." <i>The Plant Cell</i> 23.2 (2011): 701-715.     |
| Solyc04g074430.1 | protein EXORDIUM-like                | EXO          | AT4G08950                  | Required for cell expansion in leaves; Mediate brassinosteroid-induced leaf and root growth/development                                                                     | Promoted cell expansion in the leaves; Promoted leaf and root growth/development | Coll-García, Danahe, et al. "EXORDIUM regulates brassinosteroid-responsive genes." <i>FEBS letters</i> 563.1-3 (2004): 82-86.                                                                                                                     |
| Solyc08g036640.3 | protein TIFY 5A-like                 | TIFY5A       | AT1G30135                  | Repressor of jasmonate responses; Interacts with and suppresses RHD6 and RSL1 transcription factor activities to negatively regulate root hair development                  | Repressed jasmonate responses; Impaired root hair development                    | Chung, Hoo Sun, and Gregg A. Howe. "A critical role for the TIFY motif in repression of jasmonate signaling by a stabilized splice variant of the JASMONATE ZIM-domain protein JAZ10 in Arabidopsis." <i>The Plant Cell</i> 21.1 (2009): 131-145. |
| Solyc04g007580.1 | uncharacterized protein LOC101267223 | N/A          | N/A                        | N/A                                                                                                                                                                         | N/A                                                                              | N/A                                                                                                                                                                                                                                               |
| Solyc12g049400.2 | protein TIFY 10b-like                | AT1G74950    | AT1G74950                  | Repressor of jasmonate responses; Negatively regulates root hair development                                                                                                | Repressed jasmonate responses; Impaired root hair development                    | Fernández-Calvo, Patricia, et al. "The Arabidopsis bHLH transcription factors MYC3 and MYC4 are targets of JAZ repressors and act additively with MYC2 in the activation of jasmonate responses." <i>The Plant Cell</i> 23.2 (2011): 701-715.     |
| Solyc07g006560.3 | ribonuclease MC-like                 | LOC107896791 | N/A                        | Involved in RNA catabolic process                                                                                                                                           | N/A                                                                              | Li, Fuguang, et al. "Genome sequence of cultivated Upland cotton ( <i>Gossypium hirsutum</i> TM-1) provides insights into genome evolution." <i>Nature biotechnology</i> 33.5 (2015): 524-530.                                                    |
| Solyc05g015800.3 | methanol O-anthraniloyltransferase   | AMAT         | N/A                        | Acyltransferase that catalyzes the formation of methyl anthranilate                                                                                                         | Increased production of methyl anthranilate                                      | Wang, Jihong, and Vincenzo De Luca. "The biosynthesis and regulation of biosynthesis of Concord grape fruit esters, including 'foxy' methylanthranilate." <i>The Plant Journal</i> 44.4 (2005): 606-619.                                          |
| Solyc10g086180.2 | phenylalanine ammonia-lyase          | PAL          | N/A                        | Enzyme of plant metabolism catalyzing the first reaction in the biosynthesis from L-phenylalanine of a wide variety of natural products based on the phenylpropane skeleton | Increased biosynthesis of L-phenylalanine derivatives                            | N/A                                                                                                                                                                                                                                               |
| Solyc08g076970.3 | N2-acetylornithine deacetylase       | N/A          | N/A                        | N/A                                                                                                                                                                         | N/A                                                                              | N/A                                                                                                                                                                                                                                               |

| TomatoID         | NCBI Protein Name                      | Gene ID      | <i>A. Thaliana</i> Homolog | Uniprot Description                                                                                                                      | Putative Consequences for Infection                                                                      | Citation                                                                                                                                                                                                                                                                     |
|------------------|----------------------------------------|--------------|----------------------------|------------------------------------------------------------------------------------------------------------------------------------------|----------------------------------------------------------------------------------------------------------|------------------------------------------------------------------------------------------------------------------------------------------------------------------------------------------------------------------------------------------------------------------------------|
| Solyc11g071760.3 | regulator of gene silencing            | N/A          | N/A                        | N/A                                                                                                                                      | N/A                                                                                                      | N/A                                                                                                                                                                                                                                                                          |
| Solyc06g051940.3 | protein phosphatase 2C                 | PP2CA        | AT3G11410                  | Major negative regulator of ABA responses during seed germination and cold acclimation; Prevents stomata closure                         | Impaired ABA responses; Promoted stomatal opening                                                        | Chérel, Isabelle, et al. "Physical and functional interaction of the Arabidopsis K <sup>+</sup> channel AKT2 and phosphatase AtPP2CA." <i>The Plant Cell</i> 14.5 (2002): 1133-1146.                                                                                         |
| Solyc01g007030.3 | E3 ubiquitin-protein ligase PUB22-like | PUB22        | AT3G52450                  | Negatively regulates water stress response; Mediates drought signaling pathway; Negative regulator of immune response triggered by PAMPs | Impaired response to drought; Impaired response to PAMPs; Impaired attenuation to PAMP-induced signaling | Trujillo, Marco, et al. "Negative regulation of PAMP-triggered immunity by an E3 ubiquitin ligase triplet in Arabidopsis." <i>Current Biology</i> 18.18 (2008): 1396-1401.                                                                                                   |
| Solyc03g013160.3 | amino acid transporter AVT1I           | AVT1I        | AT3G28960                  | Amino acid transporter                                                                                                                   | Increased amino acid transport                                                                           | Fujiki, Yuki, et al. "Functional identification of AtAVT3, a family of vacuolar amino acid transporters, in Arabidopsis." <i>FEBS letters</i> 591.1 (2017): 5-15.                                                                                                            |
| Solyc12g019320.2 | protein DETOXIFICATION 30-like         | LOC107764941 | N/A                        | Xenobiotic transmembrane transporter activity                                                                                            | Increased detoxification                                                                                 | Sierra, Nicolas, et al. "The tobacco genome sequence and its comparison with those of tomato and potato." <i>Nature communications</i> 5.1 (2014): 1-9.                                                                                                                      |
| Solyc11g018805.1 | N/A                                    | N/A          | N/A                        | N/A                                                                                                                                      | N/A                                                                                                      | N/A                                                                                                                                                                                                                                                                          |
| Solyc07g041920.3 | cysteine proteinase 3-like             | CYS3         | AT2G40880                  | Involved in the regulation of endogenous processes; Involved in the regulation of defense against pests and pathogens                    | Promoted regulation of endogenous processes; Increased regulation of defense                             | Belenghi, Beatrice, et al. "AtCYS1, a cystatin from Arabidopsis thaliana, suppresses hypersensitive cell death." <i>European Journal of Biochemistry</i> 270.12 (2003): 2593-2604.                                                                                           |
| Solyc00g071180.3 | multicystatin                          | N/A          | N/A                        | N/A                                                                                                                                      | N/A                                                                                                      | Jacinto, Tânia, et al. "Leaves of transgenic tomato plants overexpressing prosystemin accumulate high levels of cystatin." <i>Plant Science</i> 138.1 (1998): 35-42.                                                                                                         |
| Solyc12g017460.1 | GDSL esterase/lipase At5g03980         | AT5G03980    | AT5G03980                  | Hydralose/esterase activity                                                                                                              | N/A                                                                                                      | Lai, Chia-Ping, et al. "Genome-wide analysis of GDSL-type esterases/lipases in Arabidopsis." <i>Plant molecular biology</i> 95.1-2 (2017): 181-197.                                                                                                                          |
| Solyc03g026280.3 | C-repeat-binding factor-1              | CBF1         | N/A                        | Transcription factor                                                                                                                     | N/A                                                                                                      | Zhen, Ying, and Mark C. Ungerer. "Relaxed selection on the CBF/DREB1 regulatory genes and reduced freezing tolerance in the southern range of Arabidopsis thaliana." <i>Molecular Biology and Evolution</i> 25.12 (2008): 2547-2555.                                         |
| Solyc02g087210.3 | stress-associated protein 11           | SAP11        | N/A                        | Involved in environmental stress response                                                                                                | Increased response to environmental stress                                                               | Vij, Shubha, and Akhilesh K. Tyagi. "Genome-wide analysis of the stress associated protein (SAP) gene family containing A20/AN1 zinc-finger (s) in rice and their phylogenetic relationship with Arabidopsis." <i>Molecular Genetics and Genomics</i> 276.6 (2006): 565-575. |
| Solyc10g086500.1 | steroid 5-alpha-reductase DET2         | DET2         | AT2G38050                  | Involved in a reduction step in the biosynthesis of the plant steroid, brassinolide                                                      | Increased brassinolide biosynthesis                                                                      | Fujioaka, Shozo, et al. "The Arabidopsis deetiolated2 mutant is blocked early in brassinosteroid biosynthesis." <i>The Plant Cell</i> 9.11 (1997): 1951-1962.                                                                                                                |
| Solyc00g145170.2 | proteinase inhibitor type-2 precursor  | N/A          | N/A                        | N/A                                                                                                                                      | N/A                                                                                                      | Balandin, Teresa, et al. "Structure and induction pattern of a novel proteinase inhibitor class II gene of tobacco." <i>Plant molecular biology</i> 27.6 (1995): 1197-1204.                                                                                                  |

| TomatoID         | NCBI Protein Name                                      | Gene ID   | <i>A. Thaliana</i> Homolog | Uniprot Description                                                                                                                                                                            | Putative Consequences for Infection                                                                                        | Citation                                                                                                                                                                                                                                                              |
|------------------|--------------------------------------------------------|-----------|----------------------------|------------------------------------------------------------------------------------------------------------------------------------------------------------------------------------------------|----------------------------------------------------------------------------------------------------------------------------|-----------------------------------------------------------------------------------------------------------------------------------------------------------------------------------------------------------------------------------------------------------------------|
| Solyc11g018800.2 | lignin-forming anionic peroxidase                      | N/A       | N/A                        | Involved in removal of H <sub>2</sub> O <sub>2</sub> , oxidation of toxic reductants, biosynthesis and degradation of lignin, suberization, auxin catabolism, and response to biotic stressors | Increased response to oxidative stress; Increased auxin catabolism; Increased defense against wounding and pathogen attack | Lagrimini, L. Mark, et al. "Molecular cloning of complementary DNA encoding the lignin-forming peroxidase from tobacco: molecular analysis and tissue-specific expression." <i>Proceedings of the National Academy of Sciences</i> 84.21 (1987): 7542-7546.           |
| Solyc08g036660.3 | protein TIFY 5A-like                                   | TIFY5A    | AT1G30135                  | Repressor of jasmonate responses; Interacts with and suppresses RHD6 and RSL1 transcription factor activities to negatively regulate root hair development                                     | Repressed jasmonate responses; Impaired root hair development                                                              | Chung, Hoo Sun, and Gregg A. Howe. "A critical role for the TIFY motif in repression of jasmonate signaling by a stabilized splice variant of the JASMONATE ZIM-domain protein JAZ10 in <i>Arabidopsis</i> ." <i>The Plant Cell</i> 21.1 (2009): 131-145.             |
| Solyc12g057060.2 | 7-deoxyloganetin glucosyltransferase-like              | N/A       | N/A                        | Iridoid glucosyltransferase acting exclusively on 7-deoxyloganetin; Involved in the synthesis of secologanin                                                                                   | Increased synthesis of secologanin                                                                                         | Asada, Keisuke, et al. "A 7-deoxyloganic acid glucosyltransferase contributes a key step in secologanin biosynthesis in Madagascar periwinkle." <i>The Plant Cell</i> 25.10 (2013): 4123-4134.                                                                        |
| Solyc02g087540.2 | AAA-ATPase At3g28510-like                              | AT3G28510 | AT3G28510                  | Involved in inter-tissue RNA transport                                                                                                                                                         | Increased inter-tissue RNA transport                                                                                       | Thieme, Christoph J., et al. "Endogenous <i>Arabidopsis</i> messenger RNAs transported to distant tissues." <i>Nature Plants</i> 1.4 (2015): 1-9.                                                                                                                     |
| Solyc08g007830.1 | dehydration-responsive element-binding protein 1F-like | DREB1F    | AT1G12610                  | Transcriptional activator that binds specifically to the C-repeat/DRE element mediating cold-inducible transcription                                                                           | Increased cold acclimation and freezing tolerance                                                                          | Sakuma, Yoh, et al. "DNA-binding specificity of the ERF/AP2 domain of <i>Arabidopsis</i> DREBs, transcription factors involved in dehydration-and cold-inducible gene expression." <i>Biochemical and biophysical research communications</i> 290.3 (2002): 998-1009. |
| Solyc06g073830.1 | putative calcium-binding protein CML19                 | CML19     | N/A                        | Calcium sensor                                                                                                                                                                                 | Promoted calcium sensing                                                                                                   | Boonburapong, Bongkoj, and Teerapong Buaboocha. "Genome-wide identification and analyses of the rice calmodulin and related potential calcium sensor proteins." <i>BMC plant biology</i> 7.1 (2007): 4.                                                               |
| Solyc08g068600.3 | aromatic amino acid decarboxylase 1B                   | AADC1B    | N/A                        | Involved in carboxylic acid metabolic process                                                                                                                                                  | Increased carboxylic acid metabolism                                                                                       | Tieman, Denise, et al. "Tomato aromatic amino acid decarboxylases participate in synthesis of the flavor volatiles 2-phenylethanol and 2-phenylacetaldehyde." <i>Proceedings of the National Academy of Sciences</i> 103.21 (2006): 8287-8292.                        |
| Solyc11g071470.1 | agmatine hydroxycinnamoyltransferase 1-like            | AHT1      | AT3G61600                  | Promotes the synthesis of hydroxycinnamic acid amides, which play a role in defense against pathogens                                                                                          | Increased defense against pathogens                                                                                        | Chen, Wei, et al. "Genome-wide association analyses provide genetic and biochemical insights into natural variation in rice metabolism." <i>Nature genetics</i> 46.7 (2014): 714-721.                                                                                 |
| Solyc01g096670.3 | cytochrome P450 98A2                                   | CYP98A2   | N/A                        | Heme binding; Iron ion binding; Oxidoreductase activity                                                                                                                                        | N/A                                                                                                                        | N/A                                                                                                                                                                                                                                                                   |
| Solyc05g005150.1 | F-box/kelch-repeat protein At1g23390                   | AT1G23390 | AT1G23390                  | Involved in proteasome-mediated, ubiquitin-dependent protein catabolic process                                                                                                                 | N/A                                                                                                                        | Pischke, Melissa S., et al. "A transcriptome-based characterization of habituation in plant tissue culture." <i>Plant Physiology</i> 140.4 (2006): 1255-1278.                                                                                                         |

| TomatoID         | NCBI Protein Name                                                  | Gene ID   | <i>A. Thaliana</i> Homolog | Uniprot Description                                                                                                                      | Putative Consequences for Infection                                                                      | Citation                                                                                                                                                                                                                                            |
|------------------|--------------------------------------------------------------------|-----------|----------------------------|------------------------------------------------------------------------------------------------------------------------------------------|----------------------------------------------------------------------------------------------------------|-----------------------------------------------------------------------------------------------------------------------------------------------------------------------------------------------------------------------------------------------------|
| Solyc06g035700.1 | ethylene-responsive transcription factor ERF025-like               | ERF025    | AT5G52020                  | Binds to the GCC-box pathogenesis-related promoter element; Regulates gene expression under stress                                       | Increased response to stress and pathogenesis                                                            | Riechmann, José Luis, et al. "Arabidopsis transcription factors: genome-wide comparative analysis among eukaryotes." <i>Science</i> 290.5499 (2000): 2105-2110.                                                                                     |
| Solyc01g007040.3 | E3 ubiquitin-protein ligase PUB22-like                             | PUB22     | AT3G52450                  | Negatively regulates water stress response; Mediates drought signaling pathway; Negative regulator of immune response triggered by PAMPs | Impaired response to drought; Impaired response to PAMPs; Impaired attenuation to PAMP-induced signaling | Trujillo, Marco, et al. "Negative regulation of PAMP-triggered immunity by an E3 ubiquitin ligase triplet in Arabidopsis." <i>Current Biology</i> 18.18 (2008): 1396-1401.                                                                          |
| Solyc04g072375.1 | N/A                                                                | N/A       | N/A                        | N/A                                                                                                                                      | N/A                                                                                                      | N/A                                                                                                                                                                                                                                                 |
| Solyc02g079590.3 | receptor-like serine/threonine-protein kinase SD1-8                | SD18      | AT4G21380                  | Involved in the regulation of cellular expansion and differentiation                                                                     | Increased regulation of cellular expansion and differentiation                                           | Ascencio-Ibáñez, José Trinidad, et al. "Global analysis of Arabidopsis gene expression uncovers a complex array of changes impacting pathogen response and cell cycle during geminivirus infection." <i>Plant physiology</i> 148.1 (2008): 436-454. |
| Solyc01g068065.1 | N/A                                                                | N/A       | N/A                        | N/A                                                                                                                                      | N/A                                                                                                      | N/A                                                                                                                                                                                                                                                 |
| Solyc11g010250.1 | uncharacterized protein LOC101262884                               | N/A       | N/A                        | N/A                                                                                                                                      | N/A                                                                                                      | N/A                                                                                                                                                                                                                                                 |
| Solyc02g086300.3 | putative glutamine amidotransferase GAT1_2.1                       | GAT1_2.1  | AT1G15040                  | Flutamine amidotransferase that represses shoot branching; Links nitrogen stress response and branching control                          | Impaired shoot branching; Stunting                                                                       | Zhu, Huifen, and Robert G. Kranz. "A nitrogen-regulated glutamine amidotransferase (GAT1_2_1) represses shoot branching in Arabidopsis." <i>Plant physiology</i> 160.4 (2012): 1770-1780.                                                           |
| Solyc12g057160.1 | classical arabinogalactan protein 5                                | AGP5      | AT1G35230                  | Proteoglycan involved in differentiation, cell-cell recognition, embryogenesis, and programmed cell death                                | Promoted plant growth/development and cell differentiation; Promoted programmed cell death               | Thieme, Christoph J., et al. "Endogenous Arabidopsis messenger RNAs transported to distant tissues." <i>Nature Plants</i> 1.4 (2015): 1-9.                                                                                                          |
| Solyc11g010170.2 | lanC-like protein GCL1                                             | GCL1      | AT5G65280                  | Plays a role in signaling                                                                                                                | N/A                                                                                                      | Gao, Yajun, et al. "Genetic characterization reveals no role for the reported ABA receptor, GCR2, in ABA control of seed germination and early seedling development in Arabidopsis." <i>The Plant Journal</i> 52.6 (2007): 1001-1013.               |
| Solyc11g044620.1 | N/A                                                                | N/A       | N/A                        | N/A                                                                                                                                      | N/A                                                                                                      | N/A                                                                                                                                                                                                                                                 |
| Solyc07g064650.2 | N/A                                                                | N/A       | N/A                        | N/A                                                                                                                                      | N/A                                                                                                      | N/A                                                                                                                                                                                                                                                 |
| Solyc10g076660.2 | probable 2-oxoglutarate-dependent dioxygenase At5g05600 isoform X1 | AT5G05600 | AT5G05600                  | Involved in anthocyanin and protoanthocyanidin biosynthesis by catalyzing the oxidation of leucoanthocyanidins into anthocyanidins       | Increased anthocyanin and protoanthocyanidin biosynthesis                                                | Wang, Yi, et al. "Transcriptome analyses show changes in gene expression to accompany pollen germination and tube growth in Arabidopsis." <i>Plant physiology</i> 148.3 (2008): 1201-1211.                                                          |
| Solyc01g095150.3 | late embryogenesis (Lea)-like protein                              | N/A       | At4g27400                  | N/A                                                                                                                                      | N/A                                                                                                      | N/A                                                                                                                                                                                                                                                 |

| TomatoID         | NCBI Protein Name                               | Gene ID | <i>A. Thaliana</i> Homolog | Uniprot Description                                                                                                                                                                                                          | Putative Consequences for Infection                                                                                                                               | Citation                                                                                                                                                                                                                                                       |
|------------------|-------------------------------------------------|---------|----------------------------|------------------------------------------------------------------------------------------------------------------------------------------------------------------------------------------------------------------------------|-------------------------------------------------------------------------------------------------------------------------------------------------------------------|----------------------------------------------------------------------------------------------------------------------------------------------------------------------------------------------------------------------------------------------------------------|
| Solyc04g074420.1 | protein EXORDIUM                                | EXO     | AT4G08950                  | Required for cell expansion in leaves; Mediate brassinosteroid-induced leaf and root growth/development                                                                                                                      | Promoted cell expansion in the leaves; Promoted leaf and root growth/development                                                                                  | Coll-Garcia, Danahe, et al. "EXORDIUM regulates brassinosteroid-responsive genes." FEBS letters 563.1-3 (2004): 82-86.                                                                                                                                         |
| Solyc06g082530.2 | scarecrow-like protein 9                        | SCL9    | AT2G37650                  | Transcription factor involved in plant development                                                                                                                                                                           | Promoted plant development                                                                                                                                        | Menges, Margit, et al. "Cell cycle-regulated gene expression in <i>Arabidopsis</i> ." Journal of Biological Chemistry 277.44 (2002): 41987-42002.                                                                                                              |
| Solyc04g082140.3 | multicopper oxidase-like protein precursor      | LPR1    | AT1G23010                  | Multicopper oxidase involved in Cu homeostasis and oxidative stress response; Necessary for root growth inhibition                                                                                                           | Promoted Cu homeostasis; Increased response to oxidative stress; Root growth inhibition                                                                           | Svistoonoff, Sergio, et al. "Root tip contact with low-phosphate media reprograms plant root architecture." Nature genetics 39.6 (2007): 792-796.                                                                                                              |
| Solyc00g095860.1 | 1-aminocyclopropane-1-carboxylate synthase-like | ACS1    | AT3G61510                  | Involved in ethylene biosynthesis                                                                                                                                                                                            | Increased ethylene biosynthesis; Increased ethylene-related signaling                                                                                             | Tsuchisaka, Atsunari, et al. "A combinatorial interplay among the 1-aminocyclopropane-1-carboxylate isoforms regulates ethylene biosynthesis in <i>Arabidopsis thaliana</i> ." Genetics 183.3 (2009): 979-1003.                                                |
| Solyc10g009270.3 | transcription factor MYC2-like                  | MYC2    | AT1G32640                  | Involved in the regulation of ABA-inducible genes under drought stress; Negative regulator of light-regulated gene expression and growth; Positive regulator of lateral root formation; Regulates sesquiterpene biosynthesis | Promoted response to drought; Impaired response to light-mediated expression; Promoted lateral root formation; Increased regulation of sesquiterpene biosynthesis | Abe, Hiroshi, et al. "Role of <i>Arabidopsis</i> MYC and MYB homologs in drought-and abscisic acid-regulated gene expression." The Plant Cell 9.10 (1997): 1859-1868.                                                                                          |
| Solyc01g108240.3 | ethylene-responsive transcription factor ERF109 | ERF109  | AT4G34410                  | Binds to the GCC-box pathogenesis-related promoter element; Regulates gene expression under stress                                                                                                                           | Increased response to stress and pathogenesis                                                                                                                     | Riechmann, José Luis, et al. " <i>Arabidopsis</i> transcription factors: genome-wide comparative analysis among eukaryotes." Science 290.5499 (2000): 2105-2110.                                                                                               |
| Solyc06g083130.3 | dCTP pyrophosphatase 1                          | DCTPP1  | AT3G25400                  | Hydrolyzes dNTPs to the corresponding nucleoside monophosphates; Protects DNA/RNA against the incorporation of these genotoxic nucleotide analogs through their catabolism                                                   | Increased DNA/RNA protection against genotoxic nucleotide analogs                                                                                                 | Cheng, Chia-Yi, et al. "Araport11: a complete reannotation of the <i>Arabidopsis thaliana</i> reference genome." The Plant Journal 89.4 (2017): 789-804.                                                                                                       |
| Solyc09g011860.3 | O-fucosyltransferase 19-like                    | OFUT19  | AT2G37980                  | Involved in Glycan metabolism                                                                                                                                                                                                | Increased Glycan metabolism                                                                                                                                       | Culligan, Kevin M., et al. "ATR and ATM play both distinct and additive roles in response to ionizing radiation." The Plant Journal 48.6 (2006): 947-961.                                                                                                      |
| Solyc09g061840.3 | acetyl-CoA C-acetyltransferase 5                | N/A     | N/A                        | Involved in plant growth and development                                                                                                                                                                                     | Increased regulation of plant growth/development                                                                                                                  | Jin, Huanan, Zhihong Song, and Basil J. Nikolau. "Reverse genetic characterization of two paralogous acetoacetyl CoA thiolase genes in <i>Arabidopsis</i> reveals their importance in plant growth and development." The Plant Journal 70.6 (2012): 1015-1032. |

| TomatoID         | NCBI Protein Name                                            | Gene ID   | <i>A. Thaliana</i> Homolog | Uniprot Description                                                                                                                                                                 | Putative Consequences for Infection                                                                                                                        | Citation                                                                                                                                                                                                                                                  |
|------------------|--------------------------------------------------------------|-----------|----------------------------|-------------------------------------------------------------------------------------------------------------------------------------------------------------------------------------|------------------------------------------------------------------------------------------------------------------------------------------------------------|-----------------------------------------------------------------------------------------------------------------------------------------------------------------------------------------------------------------------------------------------------------|
| Solyc10g005480.3 | F-box protein SKIP27                                         | SKIP27    | AT4G21510                  | Component of SCF(ASK-cullin-F-box) E3 ubiquitin ligase complexes, which mediate the ubiquitination and subsequent proteasomal degradation of target proteins                        | Increased proteasomal degradation                                                                                                                          | Risseuw, Eddy P., et al. "Protein interaction analysis of SCF ubiquitin E3 ligase subunits from Arabidopsis." <i>The Plant Journal</i> 34.6 (2003): 753-767.                                                                                              |
| Solyc04g005040.1 | matrix metalloproteinase 2 precursor                         | 2MMP      | AT1G70170                  | Play a role in the degradation and remodeling of the extracellular matrix during development or in response to stressors; Required for plant growth, morphogenesis, and development | Increased degradation and remodeling of the extracellular matrix; Promoted plant growth, morphogenesis, and development; Promoted flowering and senescence | Golldack, Dortje, Olga V. Popova, and Karl-Josef Dietz. "Mutation of the matrix metalloproteinase At2-MMP inhibits growth and causes late flowering and early senescence in Arabidopsis." <i>Journal of Biological Chemistry</i> 277.7 (2002): 5541-5547. |
| Solyc10g084320.2 | subtilisin-like protease SBT1.9                              | SBT1.9    | AT5G67090                  | Involved in proteolysis                                                                                                                                                             | Increased proteolysis                                                                                                                                      | Barrero, José María, et al. "INCURVATA2 encodes the catalytic subunit of DNA polymerase $\alpha$ and interacts with genes involved in chromatin-mediated cellular memory in Arabidopsis thaliana." <i>The Plant Cell</i> 19.9 (2007): 2822-2838.          |
| Solyc07g052203.1 | N/A                                                          | N/A       | N/A                        | N/A                                                                                                                                                                                 | N/A                                                                                                                                                        | N/A                                                                                                                                                                                                                                                       |
| Solyc03g096050.3 | probable 2-oxoglutarate-dependent dioxygenase At5g05600      | AT5G05600 | AT5G05600                  | Involved in anthocyanin and protoanthocyanidin biosynthesis                                                                                                                         | Increased anthocyanin and protoanthocyanidin biosynthesis                                                                                                  | Wang, Yi, et al. "Transcriptome analyses show changes in gene expression to accompany pollen germination and tube growth in Arabidopsis." <i>Plant physiology</i> 148.3 (2008): 1201-1211.                                                                |
| Solyc06g061200.1 | glycine-rich protein TomR2                                   | TomR2     | N/A                        | N/A                                                                                                                                                                                 | N/A                                                                                                                                                        | Lin, Wan-Chi, et al. "A glycine-rich protein gene family predominantly expressed in tomato roots, but not in leaves and ripe fruit." <i>Plant science</i> 168.2 (2005): 283-295.                                                                          |
| Solyc09g072750.2 | uncharacterized protein LOC104649361                         | N/A       | N/A                        | N/A                                                                                                                                                                                 | N/A                                                                                                                                                        | N/A                                                                                                                                                                                                                                                       |
| Solyc12g014430.2 | cellulose synthase-like protein G3                           | CSLG3     | AT4G23990                  | Golgi-localized beta-glycan synthase that polymerize the backbones of noncellulosic polysaccharides of plant cell wall                                                              | Promoted plant cell wall growth/development                                                                                                                | Lao, Jeemeng, et al. "The plant glycosyltransferase clone collection for functional genomics." <i>The Plant Journal</i> 79.3 (2014): 517-529.                                                                                                             |
| Solyc02g077330.3 | GDLS-like lipase/acylhydrolase superfamily protein precursor | AT1G20132 | AT1G20132                  | Lipid metabolic process                                                                                                                                                             | Increased lipid catabolism                                                                                                                                 | Cheng, Chia-Yi, et al. "Araport11: a complete reannotation of the Arabidopsis thaliana reference genome." <i>The Plant Journal</i> 89.4 (2017): 789-804.                                                                                                  |
| Solyc03g122340.3 | lipoygenase                                                  | N/A       | N/A                        | Involved in growth and development, pest resistance, and senescence in response to wounding                                                                                         | Promoted plant growth/development, pest resistance, and senescence                                                                                         | Chechetkin, I. R., et al. "Specificity of oxidation of linoleic acid homologs by plant lipoygenases." <i>Biochemistry (Moscow)</i> 74.8 (2009): 855-861.                                                                                                  |

| TomatoID         | NCBI Protein Name                                               | Gene ID   | <i>A. Thaliana</i> Homolog | Uniprot Description                                                                                                                                      | Putative Consequences for Infection                                                                 | Citation                                                                                                                                                                                                                                                       |
|------------------|-----------------------------------------------------------------|-----------|----------------------------|----------------------------------------------------------------------------------------------------------------------------------------------------------|-----------------------------------------------------------------------------------------------------|----------------------------------------------------------------------------------------------------------------------------------------------------------------------------------------------------------------------------------------------------------------|
| Solyc08g068610.3 | aromatic amino acid decarboxylase 1B                            | AADC1B    | N/A                        | Involved in carboxylic acid metabolic process                                                                                                            | Increased carboxylic acid metabolism                                                                | Tieman, Denise, et al. "Tomato aromatic amino acid decarboxylases participate in synthesis of the flavor volatiles 2-phenylethanol and 2-phenylacetaldehyde." <i>Proceedings of the National Academy of Sciences</i> 103.21 (2006): 8287-8292.                 |
| Solyc10g075110.2 | non-specific lipid-transfer protein 1 precursor                 | LTP1      | N/A                        | Play a role in wax or cutin deposition in the cell walls of expanding epidermal cells and certain secretory tissues                                      | Promoted cell wall expansion                                                                        | Skriver, Karen, et al. "Structure and expression of the barley lipid transfer protein gene Ltp1." <i>Plant molecular biology</i> 18.3 (1992): 585-589.                                                                                                         |
| Solyc12g087790.1 | N/A                                                             | N/A       | N/A                        | N/A                                                                                                                                                      | N/A                                                                                                 | N/A                                                                                                                                                                                                                                                            |
| Solyc07g045350.3 | Acetyl-CoA acetyltransferase, cytosolic 1                       | AAT1      | AT5G48230                  | Involved in plant growth and development                                                                                                                 | Increased regulation of plant growth/development                                                    | Jin, Huanan, Zhihong Song, and Basil J. Nikolau. "Reverse genetic characterization of two paralogous acetoacetyl CoA thiolase genes in Arabidopsis reveals their importance in plant growth and development." <i>The Plant Journal</i> 70.6 (2012): 1015-1032. |
| Solyc06g074030.1 | probable CCR4-associated factor 1 homolog 9                     | CAF1-9    | AT3G44260                  | Ubiquitous transcription factor required for a diverse set of processes; Component of the CCR4 complex involved in the control of gene expression        | Promoted gene expression                                                                            | Chang, Shuang, and Craig S. Pikaard. "Transcript profiling in Arabidopsis reveals complex responses to global inhibition of DNA methylation and histone deacetylation." <i>Journal of Biological Chemistry</i> 280.1 (2005): 796-804.                          |
| Solyc10g050970.1 | ethylene-responsive transcription factor ERF109-like            | ERF109    | AT4G34410                  | Regulates gene expression under stress                                                                                                                   | Increased response to stress and pathogenesis                                                       | Riechmann, José Luis, et al. "Arabidopsis transcription factors: genome-wide comparative analysis among eukaryotes." <i>Science</i> 290.5499 (2000): 2105-2110.                                                                                                |
| Solyc12g009000.1 | protein ALP1-like                                               | AT3G55350 | AT3G55350                  | Transposase-derived protein that has nuclease activity                                                                                                   | N/A                                                                                                 | Joly-Lopez, Zoé, et al. "Abiotic stress phenotypes are associated with conserved genes derived from transposable elements." <i>Frontiers in plant science</i> 8 (2017): 2027.                                                                                  |
| Solyc12g010420.1 | uncharacterized protein LOC104644843                            | N/A       | N/A                        | N/A                                                                                                                                                      | N/A                                                                                                 | N/A                                                                                                                                                                                                                                                            |
| Solyc05g006220.3 | IAA-amino acid hydrolase ILR1-like 2                            | ILL2      | AT5G56660                  | Hydrolyzes certain amino acid conjugates of the plant growth regulator indole-3-acetic acid; Acts with ILR1 to provide free IAA to germinating seedlings | Promoted regulation of plant growth; Increased IAA supply to seedlings; Increased response to auxin | LeClere, Sherry, et al. "Characterization of a family of IAA-amino acid conjugate hydrolases from Arabidopsis." <i>Journal of Biological Chemistry</i> 277.23 (2002): 20446-20452.                                                                             |
| Solyc10g076250.2 | alanine--glyoxylate aminotransferase 2 homolog 2, mitochondrial | AGT3      | AT2G38400                  | Transaminase activity                                                                                                                                    | N/A                                                                                                 | Carrie, Chris, et al. "Identification of cleavage sites and substrate proteins for two mitochondrial intermediate peptidases in Arabidopsis thaliana." <i>Journal of experimental botany</i> 66.9 (2015): 2691-2708.                                           |

| TomatoID         | NCBI Protein Name                                              | Gene ID   | <i>A. Thaliana</i> Homolog | Uniprot Description                                                                                                                                                             | Putative Consequences for Infection                                                                  | Citation                                                                                                                                                                                                                                                                                 |
|------------------|----------------------------------------------------------------|-----------|----------------------------|---------------------------------------------------------------------------------------------------------------------------------------------------------------------------------|------------------------------------------------------------------------------------------------------|------------------------------------------------------------------------------------------------------------------------------------------------------------------------------------------------------------------------------------------------------------------------------------------|
| Solyc08g079090.3 | monocopper oxidase-like protein SKU5                           | SKU5      | AT4G12420                  | Involved in directional growth processes, possibly by participating in cell wall expansion                                                                                      | Promoted cell wall expansion; Promoted directional growth processes                                  | Shahollari, Bationa, et al. "A leucine-rich repeat protein is required for growth promotion and enhanced seed production mediated by the endophytic fungus <i>Piriformospora indica</i> in <i>Arabidopsis thaliana</i> ." <i>The Plant Journal</i> 50.1 (2007): 1-13.                    |
| Solyc08g074682.1 | N/A                                                            | N/A       | N/A                        | N/A                                                                                                                                                                             | N/A                                                                                                  | N/A                                                                                                                                                                                                                                                                                      |
| Solyc03g124110.2 | dehydration-responsive element-binding protein 1A              | DREB1A    | AT4G25480                  | Transcriptional activator that binds specifically to the C-repeat/DRE element mediating cold-inducible transcription                                                            | Increased cold acclimation and freezing tolerance                                                    | Alonso-Blanco, Carlos, et al. "Genetic and molecular analyses of natural variation indicate CBF2 as a candidate gene for underlying a freezing tolerance quantitative trait locus in <i>Arabidopsis</i> ." <i>Plant Physiology</i> 139.3 (2005): 1304-1312.                              |
| Solyc04g063210.3 | probable caffeoyl-CoA O-methyltransferase At4g26220 isoform X2 | AT4G26220 | AT4G26220                  | Plays a role in the synthesis of feruloylated polysaccharides; Involved in the reinforcement of the plant cell wall; Involved in response to wounding and/or pathogen challenge | Increased reinforcement of plant cell walls; Promoted response to wounding and/or pathogen challenge | Meyermans, Hugo, et al. "Modifications in lignin and accumulation of phenolic glucosides in poplar xylem upon down-regulation of caffeoyl-coenzyme A O-methyltransferase, an enzyme involved in lignin biosynthesis." <i>Journal of Biological Chemistry</i> 275.47 (2000): 36899-36909. |
| Solyc08g081550.3 | 1-aminocyclopropane-1-carboxylate synthase                     | ACS1      | AT3G61510                  | Involved in ethylene biosynthesis                                                                                                                                               | Increased ethylene biosynthesis                                                                      | Tsuchisaka, Atsunari, et al. "A combinatorial interplay among the 1-aminocyclopropane-1-carboxylate isoforms regulates ethylene biosynthesis in <i>Arabidopsis thaliana</i> ." <i>Genetics</i> 183.3 (2009): 979-1003.                                                                   |
| Solyc08g068710.1 | tyramine N-feruloyltransferase 4/11-like                       | THT4      | N/A                        | Synthesizes amides which are involved in stress response in the cell wall                                                                                                       | Promoted stress response in the plant cell wall                                                      | Farmer, Mary Jo, et al. "Identification and characterization of cDNA clones encoding hydroxycinnamoyl-CoA: tyramine N-hydroxycinnamoyltransferase from tobacco." <i>European journal of biochemistry</i> 263.3 (1999): 686-694.                                                          |
| Solyc01g005865.1 | N/A                                                            | N/A       | N/A                        | N/A                                                                                                                                                                             | N/A                                                                                                  | N/A                                                                                                                                                                                                                                                                                      |
| Solyc01g005870.2 | receptor-like protein Cf-9                                     | CF-9      | N/A                        | Involved in plant defense; Confers resistance to the fungal pathogen                                                                                                            | Promoted defense against certain fungal pathogens                                                    | van der Hoorn, Renier AL, et al. "Structure-function analysis of cf-9, a receptor-like protein with extracytoplasmic leucine-rich repeats." <i>The Plant Cell</i> 17.3 (2005): 1000-1015.                                                                                                |
| Solyc01g105650.3 | protein DMR6-LIKE OXYGENASE 2-like                             | DLO2      | AT4G10490                  | Component of a negative feedback regulation system of SA levels; Negative regulator of defense against certain pathogens                                                        | Negative system regulation of SA; Down regulator of defense against certain pathogens                | Zeilmaker, Tieme, et al. "DOWNY MILDEW RESISTANT 6 and DMR 6-LIKE OXYGENASE 1 are partially redundant but distinct suppressors of immunity in <i>Arabidopsis</i> ." <i>The Plant Journal</i> 81.2 (2015): 210-222.                                                                       |
| Solyc12g009240.1 | ethylene-responsive transcription factor ERF017                | ERF017    | AT1G19210                  | Regulates gene expression under stress                                                                                                                                          | Increased response to stress and pathogenesis                                                        | Riechmann, José Luis, et al. "Arabidopsis transcription factors: genome-wide comparative analysis among eukaryotes." <i>Science</i> 290.5499 (2000): 2105-2110.                                                                                                                          |
| Solyc01g058500.3 | uncharacterized protein LOC101254183                           | N/A       | N/A                        | N/A                                                                                                                                                                             | N/A                                                                                                  | N/A                                                                                                                                                                                                                                                                                      |
| Solyc06g075690.3 | auxin-regulated protein isoform X1                             | N/A       | N/A                        | N/A                                                                                                                                                                             | N/A                                                                                                  | N/A                                                                                                                                                                                                                                                                                      |

| TomatoID         | NCBI Protein Name                                                  | Gene ID   | A. Thaliana Homolog | Uniprot Description                                                                                                                                                                 | Putative Consequences for Infection                                                                                        | Citation                                                                                                                                                                                                                                |
|------------------|--------------------------------------------------------------------|-----------|---------------------|-------------------------------------------------------------------------------------------------------------------------------------------------------------------------------------|----------------------------------------------------------------------------------------------------------------------------|-----------------------------------------------------------------------------------------------------------------------------------------------------------------------------------------------------------------------------------------|
| Solyc06g083040.3 | wound-inducible carboxypeptidase                                   | N/A       | N/A                 | N/A                                                                                                                                                                                 | N/A                                                                                                                        | N/A                                                                                                                                                                                                                                     |
| Solyc07g006890.1 | cytochrome P450 94A1-like                                          | CYP94A1   | N/A                 | Catalyzes the omega-hydroxylation of various fatty acids; Plays a minor role in cutin synthesis and plant defense                                                                   | Increased cutin synthesis and plant defense                                                                                | TUJET, Nathalie, et al. "Functional expression in yeast and characterization of a clofibrate-inducible plant cytochrome P-450 (CYP94A1) involved in cutin monomers synthesis." <i>Biochemical Journal</i> 332.2 (1998): 583-589.        |
| Solyc06g074530.1 | arogenate dehydratase/prephenate dehydratase 6, chloroplastic-like | ADT6      | AT1G08250           | Converts the prephenate produced from the shikimate-chorismate pathway into phenylalanine                                                                                           | Increased phenylalanine production; Increased production of primary and secondary metabolites                              | Cho, Man-Ho, et al. "Phenylalanine biosynthesis in Arabidopsis thaliana identification and characterization of Arogenate dehydratases." <i>Journal of Biological Chemistry</i> 282.42 (2007): 30827-30835.                              |
| Solyc12g005450.1 | probable receptor-like protein kinase At4g10390                    | AT4G10390 | AT4G10390           | Involved in protein phosphorylation; Involved in response to wounding                                                                                                               | Increased protein phosphorylation; Promoted response to wounding                                                           | Peng, Mingsheng, et al. "Genome-wide analysis of Arabidopsis responsive transcriptome to nitrogen limitation and its regulation by the ubiquitin ligase gene NLA." <i>Plant molecular biology</i> 65.6 (2007): 775-797.                 |
| Solyc04g074950.3 | esterase CG5412 isoform X2                                         | CG5412    | N/A                 | Hydrolase activity                                                                                                                                                                  | N/A                                                                                                                        | N/A                                                                                                                                                                                                                                     |
| Solyc07g048060.2 | cytochrome b561 and DOMON domain-containing protein At5g48750      | AT5G48750 | AT5G48750           | Involved in oxidation-reduction process                                                                                                                                             | Improved oxidation-reduction                                                                                               | Kotani, Hirokazu, et al. "Structural analysis of Arabidopsis thaliana chromosome 5. VI. Sequence features of the regions of 1,367,185 bp covered by 19 physically assigned P1 and TAC clones." <i>DNA Research</i> 5.3 (1998): 203-216. |
| Solyc08g077020.1 | auxin-responsive protein SAUR76                                    | SAUR76    | AT5G20820           | Involved in the regulation of ethylene receptor signaling; Promotes cell expansion and plant growth; Involved in the regulation of cell elongation                                  | Increased ethylene receptor signaling; Promoted cell expansion and plant growth/development; Leaf curl                     | Markakis, Marios Nektarios, et al. "Characterization of a small auxin-up RNA (SAUR)-like gene involved in Arabidopsis thaliana development." <i>PLoS one</i> 8.11 (2013): e82596.                                                       |
| Solyc01g097520.3 | annexin D4-like                                                    | ANN4      | AT2G38750           | Involved in osmotic stress response and ABA signaling                                                                                                                               | Increased osmotic stress and ABA signaling                                                                                 | Lee, Sumin, et al. "Proteomic identification of annexins, calcium-dependent membrane binding proteins that mediate osmotic stress and abscisic acid signal transduction in Arabidopsis." <i>The Plant Cell</i> 16.6 (2004): 1378-1391.  |
| Solyc03g111290.1 | cytochrome P450 94B3-like                                          | CYP94B3   | AT3G48520           | Hydroxylase involved in the oxidation of the plant hormone JA-Ile; Exerts negative feedback control on JA-Ile levels and plays a key role in attenuation of jasmonate responses     | Promoted attenuation to JA-Ile and response to jasmonate                                                                   | Kitaoka, Naoki, et al. "Arabidopsis CYP94B3 encodes jasmonyl-L-isoleucine 12-hydroxylase, a key enzyme in the oxidative catabolism of jasmonate." <i>Plant and Cell Physiology</i> 52.10 (2011): 1757-1765.                             |
| Solyc03g119980.3 | caffeoylshikimate esterase                                         | CSE       | AT1G52760           | Involved in the biosynthesis of lignin; Promotes the degradation of lysophosphatidylcholine and detoxifies the peroxidized membrane in response to cadmium-induced oxidative stress | Increased biosynthesis of lignin; Increased detoxification of peroxidized membrane; Increased response to oxidative stress | Gao, Wei, et al. "Acyl-CoA-binding protein 2 binds lysophospholipase 2 and lysoPC to promote tolerance to cadmium-induced oxidative stress in transgenic Arabidopsis." <i>The Plant Journal</i> 62.6 (2010): 989-1003.                  |

| TomatoID         | NCBI Protein Name                                             | Gene ID | <i>A. Thaliana</i> Homolog | Uniprot Description                                                                                                                                                       | Putative Consequences for Infection                                                                                                  | Citation                                                                                                                                                                                                                                                               |
|------------------|---------------------------------------------------------------|---------|----------------------------|---------------------------------------------------------------------------------------------------------------------------------------------------------------------------|--------------------------------------------------------------------------------------------------------------------------------------|------------------------------------------------------------------------------------------------------------------------------------------------------------------------------------------------------------------------------------------------------------------------|
| Solyc01g090180.3 | 4,5-DOPA dioxygenase extradiol                                | DODA    | N/A                        | Opens the cyclic ring of dihydroxy-phenylalanine, producing betalamic acid                                                                                                | Increased betalamic acid production; Increased pigment production                                                                    | Christinet, Laurent, et al. "Characterization and functional identification of a novel plant 4, 5-extradiol dioxygenase involved in betalain pigment biosynthesis in <i>Portulaca grandiflora</i> ." <i>Plant Physiology</i> 134.1 (2004): 265-274.                    |
| Solyc01g059990.3 | uncharacterized protein LOC101244610                          | N/A     | N/A                        | N/A                                                                                                                                                                       | N/A                                                                                                                                  | N/A                                                                                                                                                                                                                                                                    |
| Solyc03g007240.3 | SPM1 protein                                                  | spm1    | N/A                        | Structural constituent of nuclear pore                                                                                                                                    | N/A                                                                                                                                  | Knight, Pamela, et al. "The <i>Theileria annulata</i> sporozoite and macroschizont polypeptide encoded by the <i>spm1</i> gene shares phenylalanine-glycine motifs with nuclear pore proteins." <i>Molecular &amp; Biochemical Parasitology</i> 1.100 (1999): 135-140. |
| Solyc03g093080.3 | probable xyloglucan endotransglucosylase/hydrolase protein 23 | XTH23   | AT4G25810                  | Cleaves and religates xyloglucan polymers, an essential constituent of the primary cell wall; Participates in cell wall construction of growing tissues                   | Increased cell wall plant expansion; Increased response to auxin                                                                     | Ascencio-Ibáñez, José Trinidad, et al. "Global analysis of <i>Arabidopsis</i> gene expression uncovers a complex array of changes impacting pathogen response and cell cycle during geminivirus infection." <i>Plant physiology</i> 148.1 (2008): 436-454.             |
| Solyc03g096290.3 | aquaporin PIP1-7                                              | PIP1-1  | AT3G61430                  | Water channel required to facilitate the transport of water across cell membrane                                                                                          | Increased water transport                                                                                                            | Marmagne, Anne, et al. "Identification of new intrinsic proteins in <i>Arabidopsis</i> plasma membrane proteome." <i>Molecular &amp; Cellular Proteomics</i> 3.7 (2004): 675-691.                                                                                      |
| Solyc07g006570.3 | ribonuclease 3-like                                           | RTL1    | AT1G80650                  | Involved in production of siRNA involved in RNA interference                                                                                                              | Increased gene silencing                                                                                                             | Charbonnel, Cyril, et al. "The siRNA suppressor RTL1 is redox-regulated through glutathionylation of a conserved cysteine in the double-stranded-RNA-binding domain." <i>Nucleic acids research</i> 45.20 (2017): 11891-11907.                                         |
| Solyc07g007760.3 | defensin-like protein precursor                               | FST     | N/A                        | Involved in floral organogenesis; Protects reproductive organs from potential pathogen attack                                                                             | Promoted floral organogenesis; Increased defense against pathogens in reproductive organs                                            | Gu, Qing, et al. "A flower-specific cDNA encoding a novel thionin in tobacco." <i>Molecular and general genetics MGG</i> 234.1 (1992): 89-96.                                                                                                                          |
| Solyc01g087590.3 | polyamine oxidase 1                                           | PAO1    | AT5G13700                  | Plays an important role in the regulation of polyamine intracellular concentration; Involved in the production of hydrogen peroxide in response to salt and cold stresses | Increased polyamine intracellular concentration; Involved in the production of hydrogen peroxide in response to salt and cold stress | Tavladoraki, Paraskevi, et al. "Heterologous expression and biochemical characterization of a polyamine oxidase from <i>Arabidopsis</i> involved in polyamine back conversion." <i>Plant Physiology</i> 141.4 (2006): 1519-1532.                                       |
| Solyc02g085730.3 | allene oxide cyclase isoform 1, chloroplastic                 | AOC1    | AT3G25760                  | Involved in the production of 12-oxo-phytyldienoic acid, a precursor of JA                                                                                                | Increased production of JA precursor                                                                                                 | Zhai, Qingzhe, et al. "Phytochrome chromophore deficiency leads to overproduction of jasmonic acid and elevated expression of jasmonate-responsive genes in <i>Arabidopsis</i> ." <i>Plant and Cell Physiology</i> 48.7 (2007): 1061-1071.                             |

| TomatoID         | NCBI Protein Name                                            | Gene ID   | <i>A. Thaliana</i> Homolog | Uniprot Description                                                                                                                      | Putative Consequences for Infection                                                                      | Citation                                                                                                                                                                                                                                                  |
|------------------|--------------------------------------------------------------|-----------|----------------------------|------------------------------------------------------------------------------------------------------------------------------------------|----------------------------------------------------------------------------------------------------------|-----------------------------------------------------------------------------------------------------------------------------------------------------------------------------------------------------------------------------------------------------------|
| Solyc08g006740.3 | aromatic amino acid decarboxylase 2                          | AADC2     | N/A                        | Involved in carboxylic acid metabolic process                                                                                            | Increased carboxylic acid metabolism                                                                     | Tieman, Denise, et al. "Tomato aromatic amino acid decarboxylases participate in synthesis of the flavor volatiles 2-phenylethanol and 2-phenylacetaldehyde." <i>Proceedings of the National Academy of Sciences</i> 103.21 (2006): 8287-8292.            |
| Solyc09g056385.1 | N/A                                                          | N/A       | N/A                        | N/A                                                                                                                                      | N/A                                                                                                      | N/A                                                                                                                                                                                                                                                       |
| Solyc10g078495.1 | N/A                                                          | N/A       | N/A                        | N/A                                                                                                                                      | N/A                                                                                                      | N/A                                                                                                                                                                                                                                                       |
| Solyc01g007955.1 | N/A                                                          | N/A       | N/A                        | N/A                                                                                                                                      | N/A                                                                                                      | N/A                                                                                                                                                                                                                                                       |
| Solyc10g080690.2 | patatin-like protein 3                                       | PLP3      | AT4G37050                  | Possesses non-specific lipolytic acyl hydrolase activity; Plays a role in root development                                               | Promoted root development                                                                                | Rietz, Steffen, et al. "Roles of Arabidopsis patatin-related phospholipases a in root development are related to auxin responses and phosphate deficiency." <i>Molecular Plant</i> 3.3 (2010): 524-538.                                                   |
| Solyc02g090360.3 | L-ascorbate oxidase homolog                                  | N/A       | N/A                        | Oxidoreductase involved in pollen tube growth                                                                                            | Promoted pollen tube growth                                                                              | Weterings, Koen, et al. "Characterization of a pollen-specific cDNA clone from <i>Nicotiana tabacum</i> expressed during microgametogenesis and germination." <i>Plant molecular biology</i> 18.6 (1992): 1101-1111.                                      |
| Solyc02g080200.3 | pectinesterase                                               | N/A       | N/A                        | Acts in the modification of cell walls via demethylesterification of cell wall pectin                                                    | Increased modification of plant cell walls                                                               | N/A                                                                                                                                                                                                                                                       |
| Solyc02g080210.3 | pectinesterase-like                                          | N/A       | N/A                        | Acts in the modification of cell walls via demethylesterification of cell wall pectin                                                    | Increased modification of plant cell walls                                                               | N/A                                                                                                                                                                                                                                                       |
| Solyc00g272810.1 | probable acetyltransferase NATA1-like                        | AT2G39020 | AT2G39020                  | N-acetyltransferase activity                                                                                                             | N/A                                                                                                      | Hanada, Kousuke, et al. "Functional compensation of primary and secondary metabolites by duplicate genes in <i>Arabidopsis thaliana</i> ." <i>Molecular biology and evolution</i> 28.1 (2011): 377-382.                                                   |
| Solyc01g007020.3 | E3 ubiquitin-protein ligase PUB22-like                       | PUB22     | AT3G52450                  | Negatively regulates water stress response; Mediates drought signaling pathway; Negative regulator of immune response triggered by PAMPs | Impaired response to drought; Impaired response to PAMPs; Impaired attenuation to PAMP-induced signaling | Trujillo, Marco, et al. "Negative regulation of PAMP-triggered immunity by an E3 ubiquitin ligase triplet in <i>Arabidopsis</i> ." <i>Current Biology</i> 18.18 (2008): 1396-1401.                                                                        |
| Solyc04g074480.3 | phospho-2-dehydro-3-deoxyheptonate aldolase 2, chloroplastic | N/A       | N/A                        | Involved in the synthesis of secondary metabolites derived from intermediates of the pre-chorismate pathway                              | Increased secondary metabolites derived from intermediates of the pre-chorismate pathway                 | Görlach, Jörn, et al. "Differential expression of tomato ( <i>Lycopersicon esculentum</i> L.) genes encoding shikimate pathway isoenzymes. I. 3-deoxy-D-arabino-heptulosonate 7-phosphate synthase." <i>Plant molecular biology</i> 23.4 (1993): 697-706. |
| Solyc11g071550.2 | probable amidase At4g34880                                   | AT4G34880 | AT4G34880                  | Amidase activity                                                                                                                         | N/A                                                                                                      | Aronsson, Henrik, et al. "Toc64/OEP64 is not essential for the efficient import of proteins into chloroplasts in <i>Arabidopsis thaliana</i> ." <i>The Plant Journal</i> 52.1 (2007): 53-68.                                                              |
| Solyc01g091165.1 | N/A                                                          | N/A       | N/A                        | N/A                                                                                                                                      | N/A                                                                                                      | N/A                                                                                                                                                                                                                                                       |

| TomatoID         | NCBI Protein Name                    | Gene ID      | A. Thaliana Homolog | Uniprot Description                                                                                                                                                                               | Putative Consequences for Infection                                                                            | Citation                                                                                                                                                                                                                                            |
|------------------|--------------------------------------|--------------|---------------------|---------------------------------------------------------------------------------------------------------------------------------------------------------------------------------------------------|----------------------------------------------------------------------------------------------------------------|-----------------------------------------------------------------------------------------------------------------------------------------------------------------------------------------------------------------------------------------------------|
| Solyc02g077050.3 | zingipain-2                          | LOC107763929 | N/A                 | Cysteine-type peptidase activity                                                                                                                                                                  | N/A                                                                                                            | Sierra, Nicolas, et al. "The tobacco genome sequence and its comparison with those of tomato and potato." <i>Nature communications</i> 5.1 (2014): 1-9.                                                                                             |
| Solyc06g082535.1 | N/A                                  | N/A          | N/A                 | N/A                                                                                                                                                                                               | N/A                                                                                                            | N/A                                                                                                                                                                                                                                                 |
| Solyc04g082200.2 | dehydrin                             | dhn          | N/A                 | Involved in drought response                                                                                                                                                                      | Increased drought response                                                                                     | Sander, I., et al. "Multiple wheat flour allergens and cross-reactive carbohydrate determinants bind IgE in baker's asthma." <i>Allergy</i> 66.9 (2011): 1208-1215.                                                                                 |
| Solyc07g063410.3 | NAC domain-containing protein JA2L   | JA2L         | N/A                 | Transcription factor that acts in the jasmonate-mediated response to infection; Involved in jasmonate- and coronatine-mediated stomatal reopening in response to infection                        | Promoted jasmonate- and coronatine-mediated response to infection                                              | Du, Minmin, et al. "MYC2 orchestrates a hierarchical transcriptional cascade that regulates jasmonate-mediated plant immunity in tomato." <i>The Plant Cell</i> 29.8 (2017): 1883-1906.                                                             |
| Solyc02g078890.1 | N/A                                  | N/A          | N/A                 | N/A                                                                                                                                                                                               | N/A                                                                                                            | N/A                                                                                                                                                                                                                                                 |
| Solyc08g081555.1 | N/A                                  | N/A          | N/A                 | N/A                                                                                                                                                                                               | N/A                                                                                                            | N/A                                                                                                                                                                                                                                                 |
| Solyc10g076240.2 | cationic peroxidase 1                | PNC1         | N/A                 | Involved in removal of H <sub>2</sub> O <sub>2</sub> , oxidation of toxic reductants, biosynthesis/degradation of lignin, suberization, auxin catabolism, and response to environmental stressors | Promoted response to oxidative stress and other environmental stressors; Increased lignin and auxin metabolism | Buffard, Dominique, et al. "Molecular cloning of complementary DNAs encoding two cationic peroxidases from cultivated peanut cells." <i>Proceedings of the National Academy of Sciences</i> 87.22 (1990): 8874-8878.                                |
| Solyc07g056480.3 | glutathione S-transferase/peroxidase | BI-GST/GPX   | N/A                 | Has peroxidase and transferase activity                                                                                                                                                           | N/A                                                                                                            | Kampranis, Sotirios C., et al. "A novel plant glutathione S-transferase/peroxidase suppresses Bax lethality in yeast." <i>Journal of Biological Chemistry</i> 275.38 (2000): 29207-29216.                                                           |
| Solyc10g084880.3 | uncharacterized protein LOC100134881 | N/A          | N/A                 | N/A                                                                                                                                                                                               | N/A                                                                                                            | N/A                                                                                                                                                                                                                                                 |
| Solyc03g118810.1 | calcium-binding allergen Ole e 8     | N/A          | N/A                 | N/A                                                                                                                                                                                               | N/A                                                                                                            | Ledesma, Amalia, Mayte Villalba, and Rosalia Rodríguez. "Cloning, expression and characterization of a novel four EF-hand Ca <sup>2+</sup> -binding protein from olive pollen with allergenic activity." <i>FEBS letters</i> 466.1 (2000): 192-196. |
| Solyc06g034370.1 | 21 kDa protein-like                  | N/A          | N/A                 | N/A                                                                                                                                                                                               | N/A                                                                                                            | N/A                                                                                                                                                                                                                                                 |
| Solyc02g080120.2 | gibberellin 2-beta-dioxygenase 8     | GA2OX8       | AT4G21200           | Catalyzes the 2-beta-hydroxylation of gibberellins precursors, rendering them unable to be converted to their active forms                                                                        | Increased gibberellin regulation; Impaired growth/development                                                  | Schomburg, Fritz M., et al. "Overexpression of a novel class of gibberellin 2-oxidases decreases gibberellin levels and creates dwarf plants." <i>The Plant Cell</i> 15.1 (2003): 151-163.                                                          |

| TomatoID         | NCBI Protein Name                                       | Gene ID   | <i>A. Thaliana</i> Homolog | Uniprot Description                                                                                                                                                             | Putative Consequences for Infection                                                            | Citation                                                                                                                                                                                               |
|------------------|---------------------------------------------------------|-----------|----------------------------|---------------------------------------------------------------------------------------------------------------------------------------------------------------------------------|------------------------------------------------------------------------------------------------|--------------------------------------------------------------------------------------------------------------------------------------------------------------------------------------------------------|
| Solyc10g085190.2 | probable 2-oxoglutarate-dependent dioxygenase At3g11180 | AT3G11180 | AT3G11180                  | Involved in anthocyanin and protoanthocyanidin biosynthesis by catalyzing the oxidation of leucoanthocyanidins into anthocyanidins                                              | Increased anthocyanin and protoanthocyanidin biosynthesis                                      | Wang, Yi, et al. "Transcriptome analyses show changes in gene expression to accompany pollen germination and tube growth in Arabidopsis." <i>Plant Physiology</i> 148.3 (2008): 1201-1211.             |
| Solyc03g093360.3 | PLAT domain-containing protein 3                        | PLAT3     | AT5G65158                  | Involved in response to abiotic stress                                                                                                                                          | Promoted response to abiotic stress                                                            | Moskal, William A., et al. "Experimental validation of novel genes predicted in the un-annotated regions of the Arabidopsis genome." <i>BMC genomics</i> 8.1 (2007): 18.                               |
| Solyc03g117600.3 | shikimate O-hydroxycinnamoyltransferase                 | HST       | AT5G48930                  | Acytransferase involved in the biosynthesis of lignin                                                                                                                           | Increased biosynthesis of lignin                                                               | Hoffmann, Laurent, et al. "Silencing of hydroxycinnamoyl-coenzyme A shikimate/quinate hydroxycinnamoyltransferase affects phenylpropanoid biosynthesis." <i>The Plant Cell</i> 16.6 (2004): 1446-1465. |
| Solyc09g083360.3 | uncharacterized protein LOC101255829                    | N/A       | N/A                        | N/A                                                                                                                                                                             | N/A                                                                                            | N/A                                                                                                                                                                                                    |
| Solyc10g080370.1 | N/A                                                     | N/A       | N/A                        | N/A                                                                                                                                                                             | N/A                                                                                            | N/A                                                                                                                                                                                                    |
| Solyc01g057770.3 | boron transporter 1 isoform X1                          | BOR1      | AT2G47160                  | Efflux-type boron transporter for xylem loading Boron is essential for maintaining the integrity of plants cell walls                                                           | Promoted boron homeostasis; Promoted plant cell wall development and integrity                 | Noguchi, Kyotaro, et al. "bor1-1, an Arabidopsis thaliana mutant that requires a high level of boron." <i>Plant Physiology</i> 115.3 (1997): 901-906.                                                  |
| Solyc09g008060.3 | UDP-glycosyltransferase 86A1-like                       | UGT86A1   | AT2G36970                  | UDP-glycosyltransferase activity                                                                                                                                                | N/A                                                                                            | Pischke, Melissa S., et al. "A transcriptome-based characterization of habituation in plant tissue culture." <i>Plant Physiology</i> 140.4 (2006): 1255-1278.                                          |
| Solyc09g066360.1 | ethylene-response factor C3                             | ERF.C.3   | N/A                        | Acts downstream of MYC2 in the jasmonate-mediated response to infection                                                                                                         | Increased ethylene-responsive signaling; Promoted jasmonate-mediated defense against pathogens | Du, Minmin, et al. "MYC2 orchestrates a hierarchical transcriptional cascade that regulates jasmonate-mediated plant immunity in tomato." <i>The Plant Cell</i> 29.8 (2017): 1883-1906.                |
| Solyc04g071770.3 | ethylene-responsive transcription factor ABR1-like      | ABR1      | AT5G64750                  | Negative regulator of the ABA signaling pathway involved in seed germination and in response to stressors                                                                       | Increased ABA signaling; Increased response to stress and pathogenesis                         | Pandey, Girdhar K., et al. "ABR1, an APETALA2-domain transcription factor that functions as a repressor of ABA response in Arabidopsis." <i>Plant Physiology</i> 139.3 (2005): 1185-1193.              |
| Solyc06g072460.1 | uncharacterized protein LOC101268692                    | N/A       | N/A                        | N/A                                                                                                                                                                             | N/A                                                                                            | N/A                                                                                                                                                                                                    |
| Solyc10g054440.2 | arginine decarboxylase 1                                | ADC1      | AT2G16500                  | Catalyzes the first step of polyamine biosynthesis to produce putrescine from arginine; Controls polyamine homeostasis which is crucial for normal plant growth and development | Increased freezing tolerance; Increased seed production; Promoted growth/development           | Hanfrey, Colin, et al. "Arabidopsis polyamine biosynthesis: absence of ornithine decarboxylase and the mechanism of arginine decarboxylase activity." <i>The Plant Journal</i> 27.6 (2001): 551-560.   |

| TomatoID         | NCBI Protein Name                             | Gene ID   | A. Thaliana Homolog | Uniprot Description                                                                                                                                                                                                                      | Putative Consequences for Infection                                                                                            | Citation                                                                                                                                                                                                                                                                               |
|------------------|-----------------------------------------------|-----------|---------------------|------------------------------------------------------------------------------------------------------------------------------------------------------------------------------------------------------------------------------------------|--------------------------------------------------------------------------------------------------------------------------------|----------------------------------------------------------------------------------------------------------------------------------------------------------------------------------------------------------------------------------------------------------------------------------------|
| Solyc01g079200.3 | gibberellin 2-oxidase                         | GA2OX     | N/A                 | Oxidoreductase activity                                                                                                                                                                                                                  | N/A                                                                                                                            | Blackman, Benjamin K., et al. "Sunflower domestication alleles support single domestication center in eastern North America." <i>Proceedings of the National Academy of Sciences</i> 108.34 (2011): 14360-14365.                                                                       |
| Solyc03g093610.1 | ethylene response factor A.2                  | ERF2      | N/A                 | Involved in defense response; Involved in intracellular signal transduction; Involved in lipid metabolism                                                                                                                                | Increased defense response; Increased intracellular signal transduction; Increased lipid metabolism                            | Zhang, Zhijin, et al. "Transcriptional regulation of the ethylene response factor LeERF2 in the expression of ethylene biosynthesis genes controls ethylene production in tomato and tobacco." <i>Plant Physiology</i> 150.1 (2009): 365-377.                                          |
| Solyc04g079360.1 | transcription factor MYB44-like               | MYB44     | AT5G67300           | Represses the expression of protein phosphatases 2C in response to ABA; Auxin-responsive; Promotes SA-mediated defense, but represses JA-mediated defense                                                                                | Increases response to ABA; Increased response to auxin signaling; Increases SA-mediated defense; Decreased JA-mediated defense | Riechmann, José Luis, et al. "Arabidopsis transcription factors: genome-wide comparative analysis among eukaryotes." <i>Science</i> 290.5499 (2000): 2105-2110.                                                                                                                        |
| Solyc09g091600.3 | protein SULFUR DEFICIENCY-INDUCED 2           | AT1G04770 | AT1G04770           | Involved in the utilization of stored sulfate under sulfur-deficient conditions                                                                                                                                                          | Increased storage of sulfate; Increased response to sulfur deficiency                                                          | Hanada, Kousuke, et al. "Functional compensation of primary and secondary metabolites by duplicate genes in Arabidopsis thaliana." <i>Molecular biology and evolution</i> 28.1 (2011): 377-382.                                                                                        |
| Solyc02g089685.1 | N/A                                           | N/A       | N/A                 | N/A                                                                                                                                                                                                                                      | N/A                                                                                                                            | N/A                                                                                                                                                                                                                                                                                    |
| Solyc00g011160.2 | N/A                                           | N/A       | N/A                 | N/A                                                                                                                                                                                                                                      | N/A                                                                                                                            | N/A                                                                                                                                                                                                                                                                                    |
| Solyc12g005640.2 | transcription factor MYB14-like               | MYB14     | AT2G31180           | Transcription activator that regulates freezing tolerance by affecting expression of CBF genes                                                                                                                                           | Promoted regulation of freezing tolerance                                                                                      | Chen, Yan, et al. "AtMYB14 regulates cold tolerance in Arabidopsis." <i>Plant molecular biology reporter</i> 31.1 (2013): 87-97.                                                                                                                                                       |
| Solyc12g042073.1 | N/A                                           | N/A       | N/A                 | N/A                                                                                                                                                                                                                                      | N/A                                                                                                                            | N/A                                                                                                                                                                                                                                                                                    |
| Solyc06g083440.3 | cytochrome b5-like                            | CB5LP     | AT1G60660           | Electron transfer activity; Heme binding; Metal ion binding                                                                                                                                                                              | Impaired methionine catabolism                                                                                                 | Rébeillé, Fabrice, et al. "Methionine catabolism in Arabidopsis cells is initiated by a $\gamma$ -cleavage process and leads to S-methylcysteine and isoleucine syntheses." <i>Proceedings of the National Academy of Sciences</i> 103.42 (2006): 15687-15692.                         |
| Solyc08g008280.3 | probable WRKY transcription factor 53         | WRKY53    | AT4G23810           | Transcription factor regulating the early events of leaf senescence; Negatively regulates the expression of ESR/ESP; Promotes resistance to certain pathogens by enhancing SA- dependent genes; Contributes to the suppression of PDF1.2 | Down regulation of ESR/ESP; Promoted resistance to certain pathogens by enhancing SA- dependent genes; Suppression of PDF1.2   | Miao, Ying, and Ulrike Zentgraf. "The antagonist function of Arabidopsis WRKY53 and ESR/ESP in leaf senescence is modulated by the jasmonic and salicylic acid equilibrium." <i>The Plant Cell</i> 19.3 (2007): 819-830.                                                               |
| Solyc10g075100.2 | non-specific lipid transfer protein precursor | N/A       | N/A                 | Plays a role in wax/cutin deposition in the cell walls of expanding epidermal cells and certain secretory tissues                                                                                                                        | Promoted cell wall expansion                                                                                                   | Xie, Wan-Qin, et al. "The effects of calmodulin on the lipid-binding activity of CaM-binding protein-10 and maize non-specific lipid transfer protein." <i>Zhi wu Sheng li yu fen zi Sheng wu xue xue bao= Journal of Plant Physiology and Molecular Biology</i> 32.6 (2006): 679-684. |

| TomatoID         | NCBI Protein Name                                     | Gene ID      | A. Thaliana Homolog | Uniprot Description                                                                                                                   | Putative Consequences for Infection                                                                                                   | Citation                                                                                                                                                                                                                                                                   |
|------------------|-------------------------------------------------------|--------------|---------------------|---------------------------------------------------------------------------------------------------------------------------------------|---------------------------------------------------------------------------------------------------------------------------------------|----------------------------------------------------------------------------------------------------------------------------------------------------------------------------------------------------------------------------------------------------------------------------|
| Solyc07g008560.3 | probable inactive purple acid phosphatase 27          | PAP27        | AT5G50400           | Acid phosphatase activity; Metal ion binding                                                                                          | N/A                                                                                                                                   | Cheng, Chia-Yi, et al. "Araport11: a complete reannotation of the Arabidopsis thaliana reference genome." The Plant Journal 89.4 (2017): 789-804.                                                                                                                          |
| Solyc01g098910.3 | peroxisomal adenine nucleotide carrier 1              | PNC1         | N/A                 | Required for the conversion of seed-reserved triacylglycerols into sucrose; Necessary for growth before the onset of photosynthesis   | Increased conversion of seed-reserved triacylglycerols; Promoted growth over storage                                                  | Arai, Yuko, Makoto Hayashi, and Mikio Nishimura. "Proteomic identification and characterization of a novel peroxisomal adenine nucleotide transporter supplying ATP for fatty acid $\beta$ -oxidation in soybean and Arabidopsis." The Plant Cell 20.12 (2008): 3227-3240. |
| Solyc04g054990.3 | PLAT domain-containing protein 2                      | PLAT2        | AT2G22170           | Involved in response to abiotic stress                                                                                                | Promoted response to abiotic stress                                                                                                   | Giacomelli, Lisa, Andrea Rudella, and Klaas Jan van Wijk. "High light response of the thylakoid proteome in Arabidopsis wild type and the ascorbate-deficient mutant vtc2-2. A comparative proteomics study." Plant Physiology 141.2 (2006): 685-701.                      |
| Solyc09g089500.3 | proteinase inhibitor I-B-like isoform X2              | LOC107794480 | N/A                 | Involved in response to wounding                                                                                                      | Promoted response to wounding                                                                                                         | Sierra, Nicolas, et al. "The tobacco genome sequence and its comparison with those of tomato and potato." Nature communications 5.1 (2014): 1-9.                                                                                                                           |
| Solyc03g080190.3 | protein DMR6-like oxygenase                           | DLO1         | AT4G10500           | Component of negative feedback regulation of SA during senescence; Negative regulator of defense against certain pathogens            | Negative system regulation of SA; Promoted leaf senescence; Down regulator of defense against certain pathogens                       | Zeilmaker, Tieme, et al. "DOWNY MILDEW RESISTANT 6 and DMR 6-LIKE OXYGENASE 1 are partially redundant but distinct suppressors of immunity in Arabidopsis." The Plant Journal 81.2 (2015): 210-222.                                                                        |
| Solyc05g050800.3 | phosphoglycerate mutase family protein                | N/A          | N/A                 | N/A                                                                                                                                   | N/A                                                                                                                                   | N/A                                                                                                                                                                                                                                                                        |
| Solyc02g091180.1 | uncharacterized protein LOC104645686                  | N/A          | N/A                 | N/A                                                                                                                                   | N/A                                                                                                                                   | N/A                                                                                                                                                                                                                                                                        |
| Solyc07g042230.1 | ethylene-responsive transcription factor ERF018-like  | ERF018       | AT1G74930           | Binds to the GCC-box pathogenesis-related promoter element; Regulates gene expression under stress                                    | Increased response to stress and pathogenesis                                                                                         | Riechmann, José Luis, et al. "Arabidopsis transcription factors: genome-wide comparative analysis among eukaryotes." Science 290.5499 (2000): 2105-2110.                                                                                                                   |
| Solyc12g011030.2 | xyloglucan endotransglucosylase-hydrolase 9 precursor | XTH9         | AT4G03210           | Essential constituent of the primary cell wall; Participates in cell wall construction of growing tissues                             | Promoted plant cell wall elongation                                                                                                   | Hyodo, Hideki, et al. "Active gene expression of a xyloglucan endotransglucosylase/hydrolase gene, XTH9, in inflorescence apices is related to cell elongation in Arabidopsis thaliana." Plant molecular biology 52.2 (2003): 473-482.                                     |
| Solyc03g117270.1 | F-box protein At5g07610                               | AT5G07610    | AT5G07610           | N/A                                                                                                                                   | N/A                                                                                                                                   | Cheng, Chia-Yi, et al. "Araport11: a complete reannotation of the Arabidopsis thaliana reference genome." The Plant Journal 89.4 (2017): 789-804.                                                                                                                          |
| Solyc04g009440.3 | NAC domain protein                                    | NAC002       | AT1G01720           | Involved in cellular response to hypoxia; Involved in regulation of ABA-activated signaling pathway; Involved in response to wounding | Increased cellular response to hypoxia; Increased in regulation of ABA-activated signaling pathway; Increased in response to wounding | "Molecular characterization of Brassica napus NAC domain transcriptional activators induced in response to biotic and abiotic stress."                                                                                                                                     |

| TomatoID         | NCBI Protein Name                                        | Gene ID | <i>A. Thaliana</i> Homolog | Uniprot Description                                                                                                                                 | Putative Consequences for Infection                                                  | Citation                                                                                                                                                                                                                                         |
|------------------|----------------------------------------------------------|---------|----------------------------|-----------------------------------------------------------------------------------------------------------------------------------------------------|--------------------------------------------------------------------------------------|--------------------------------------------------------------------------------------------------------------------------------------------------------------------------------------------------------------------------------------------------|
| Solyc02g064680.3 | calcium-transporting ATPase 2, plasma membrane-type-like | ACA2    | AT4G37640                  | Catalyzes the hydrolysis of ATP coupled with the translocation of calcium from the cytosol into the endoplasmic reticulum                           | Increased ATP-dependent translocation of calcium into the endoplasmic reticulum      | Harper, Jeffrey F., et al. "A novel calmodulin-regulated Ca <sup>2+</sup> -ATPase (ACA2) from Arabidopsis with an N-terminal autoinhibitory domain." <i>Journal of Biological Chemistry</i> 273.2 (1998): 1099-1106.                             |
| Solyc05g009470.3 | alpha-xylosidase 1                                       | XYL1    | AT1G68560                  | Glycoside hydrolase releasing xylosyl residues from xyloglucan oligosaccharides; Essential for growth/development                                   | Promoted growth/development                                                          | Sampedro, Javier, et al. "Cloning and expression pattern of a gene encoding an $\alpha$ -xylosidase active against xyloglucan oligosaccharides from Arabidopsis." <i>Plant Physiology</i> 126.2 (2001): 910-920.                                 |
| Solyc06g074420.1 | cytochrome P450 94C1                                     | CYP94C1 | AT2G27690                  | Hydroxylase involved in the oxidation of JA-Ile; Exerts negative feedback control on JA-Ile levels and plays a key role in attenuation to jasmonate | Promoted attenuation to JA-Ile and response to jasmonate                             | Kandel, Sylvie, et al. "Characterization of a methyl jasmonate and wounding-responsive cytochrome P450 of Arabidopsis thaliana catalyzing dicarboxylic fatty acid formation in vitro." <i>The FEBS journal</i> 274.19 (2007): 5116-5127.         |
| Solyc11g027760.1 | uncharacterized protein LOC104645327                     | N/A     | N/A                        | N/A                                                                                                                                                 | N/A                                                                                  | N/A                                                                                                                                                                                                                                              |
| Solyc01g109710.3 | protein response to dessication 2                        | Rd2     | N/A                        | N/A                                                                                                                                                 | N/A                                                                                  | Tomato Genome Consortium. "The tomato genome sequence provides insights into fleshy fruit evolution." <i>Nature</i> 485.7400 (2012): 635.                                                                                                        |
| Solyc03g122190.3 | salt responsive protein 1                                | SISRG1  | N/A                        | Involved in regulation of defense; Involved in regulation of JA-mediated signaling pathway                                                          | Promoted regulation of defense; Promoted regulation of JA-mediated signaling pathway | Ouyang, Bo, et al. "Identification of early salt stress response genes in tomato root by suppression subtractive hybridization and microarray analysis." <i>Journal of experimental botany</i> 58.3 (2007): 507-520.                             |
| Solyc01g087020.2 | N/A                                                      | N/A     | N/A                        | N/A                                                                                                                                                 | N/A                                                                                  | N/A                                                                                                                                                                                                                                              |
| Solyc03g123620.4 | pectinesterase 3                                         | PME3    | AT3G14310                  | Acts in the modification of cell walls via demethylesterification of cell wall pectin                                                               | Increased modification of plant cell walls                                           | N/A                                                                                                                                                                                                                                              |
| Solyc10g081570.2 | ABC transporter F family member 4                        | ABCF4   | AT3G54540                  | Involved in drought and pathogen resistance                                                                                                         | Increased resistance to drought and pathogens                                        | Kaundal, Amita, et al. "GENERAL CONTROL NONREPRESSIBLE4 degrades 14-3-3 and the RIN4 complex to regulate stomatal aperture with implications on nonhost disease resistance and drought tolerance." <i>The Plant Cell</i> 29.9 (2017): 2233-2248. |
| Solyc08g007840.2 | ethylene-responsive transcription factor ERF027-like     | ERF027  | AT1G12630                  | Binds to the GCC-box pathogenesis-related promoter element; Regulates gene expression under stress                                                  | Increased response to stress and pathogenesis                                        | Riechmann, José Luis, et al. "Arabidopsis transcription factors: genome-wide comparative analysis among eukaryotes." <i>Science</i> 290.5499 (2000): 2105-2110.                                                                                  |
| Solyc02g080190.3 | nuclear transport factor 2B                              | NTF2B   | AT1G27970                  | Part of a multicomponent system of cytosolic factors that assemble at the pore complex during nuclear import                                        | Increased protein transport into the nucleus                                         | Zhao, Qiao, et al. "Identification and characterization of the Arabidopsis orthologs of nuclear transport factor 2, the nuclear import factor of ran." <i>Plant physiology</i> 140.3 (2006): 869-878.                                            |

| TomatoID         | NCBI Protein Name                                 | Gene ID   | A. Thaliana Homolog | Uniprot Description                                                                                                                                                               | Putative Consequences for Infection                                        | Citation                                                                                                                                                                                                                                                |
|------------------|---------------------------------------------------|-----------|---------------------|-----------------------------------------------------------------------------------------------------------------------------------------------------------------------------------|----------------------------------------------------------------------------|---------------------------------------------------------------------------------------------------------------------------------------------------------------------------------------------------------------------------------------------------------|
| Solyc09g018250.2 | GBF-interacting protein 1-like isoform X1         | GIP1      | AT3G13222           | Contributes to bZIP-mediated gene regulation; Acts as negative co-regulator in red and blue light-mediated hypocotyl elongation                                                   | Promoted gene regulation; Increased seed germination                       | Sehnke, Paul C., et al. "Identification and characterization of GIP1, an Arabidopsis thaliana protein that enhances the DNA binding affinity and reduces the oligomeric state of G-box binding factors." Cell research 15.8 (2005): 567-575.            |
| Solyc03g026270.3 | dehydration-responsive element-binding protein 1A | DREB1A    | AT4G25480           | Transcriptional activator that binds specifically to the C-repeat/DRE element mediating cold-inducible transcription                                                              | Increased cold acclimation and freezing tolerance                          | Sakuma, Yoh, et al. "DNA-binding specificity of the ERF/AP2 domain of Arabidopsis DREBs, transcription factors involved in dehydration-and cold-inducible gene expression." Biochemical and biophysical research communications 290.3 (2002): 998-1009. |
| Solyc12g099000.2 | S-adenosylmethionine synthase 2                   | SAM2      | AT4G01850           | Involved in SA-mediated defense                                                                                                                                                   | Increased S-adenosylmethionine production; Promoted early defense response | Rajjou, Loic, et al. "Proteomic investigation of the effect of salicylic acid on Arabidopsis seed germination and establishment of early defense mechanisms." Plant physiology 141.3 (2006): 910-923.                                                   |
| Solyc06g007120.3 | PI-phospholipase C PLC4                           | PLC4      | AT5G58700           | Involved in the production of the second messenger molecules diacylglycerol and inositol 1,4,5-trisphosphate                                                                      | Impaired production of secondary messenger molecules                       | Hunt, L., et al. "Gene-specific expression and calcium activation of Arabidopsis thaliana phospholipase C isoforms." New Phytologist 162.3 (2004): 643-654.                                                                                             |
| Solyc02g071610.3 | GDSL esterase/lipase At5g45670                    | AT5G45670 | AT5G45670           | Involved in lipid catabolism                                                                                                                                                      | Increased lipid catabolism                                                 | Rouhier, Nicolas, et al. "Identification of plant glutaredoxin targets." Antioxidants & redox signaling 7.7-8 (2005): 919-929.                                                                                                                          |
| Solyc02g071720.2 | GDSL esterase/lipase At1g29670-like               | AT1G29670 | AT1G29670           | Hydralose/esterase activity                                                                                                                                                       | N/A                                                                        | Sierra, Nicolas, et al. "The tobacco genome sequence and its comparison with those of tomato and potato." Nature communications 5.1 (2014): 1-9.                                                                                                        |
| Solyc04g082030.1 | ornithine decarboxylase                           | ODC       | N/A                 | Catalyzes the first and rate-limiting step of polyamine biosynthesis that converts ornithine into putrescine, which is the precursor for the polyamines, spermidine, and spermine | Increased production of polyamines, spermidine, and spermine               | Alabadi, David, and Juan Carbonell. "Expression of ornithine decarboxylase is transiently increased by pollination, 2, 4-dichlorophenoxyacetic acid, and gibberellic acid in tomato ovaries." Plant physiology 118.1 (1998): 323-328.                   |
| Solyc02g067610.1 | N/A                                               | N/A       | N/A                 | N/A                                                                                                                                                                               | N/A                                                                        | N/A                                                                                                                                                                                                                                                     |
| Solyc07g005330.3 | beta-glucosidase 08 precursor                     | BGLU8     | AT3G62750           | Catalyzes hydrolysis of terminal, non-reducing beta-D-glucosyl residues with release of beta-D-glucose                                                                            | Increased cellulose production; Promoted plant growth/development          | Thieme, Christoph J., et al. "Endogenous Arabidopsis messenger RNAs transported to distant tissues." Nature Plants 1.4 (2015): 1-9.                                                                                                                     |
| Solyc09g062970.1 | glycine-rich protein 5-like                       | GRP5      | AT3G20470           | Involved in organ growth by promoting cell elongation processes                                                                                                                   | Promoted cell elongation                                                   | Mangeon, Amanda, et al. "AtGRP5, a vacuole-located glycine-rich protein involved in cell elongation." Planta 230.2 (2009): 253-265.                                                                                                                     |
| Solyc02g085495.1 | N/A                                               | N/A       | N/A                 | N/A                                                                                                                                                                               | N/A                                                                        | N/A                                                                                                                                                                                                                                                     |

| TomatoID         | NCBI Protein Name                                                    | Gene ID   | <i>A. Thaliana</i> Homolog | Uniprot Description                                                                                                                      | Putative Consequences for Infection                                                                       | Citation                                                                                                                                                                                                                                                                                      |
|------------------|----------------------------------------------------------------------|-----------|----------------------------|------------------------------------------------------------------------------------------------------------------------------------------|-----------------------------------------------------------------------------------------------------------|-----------------------------------------------------------------------------------------------------------------------------------------------------------------------------------------------------------------------------------------------------------------------------------------------|
| Solyc01g080010.2 | xyloglucan-specific fungal endoglucanase inhibitor protein precursor | N/A       | N/A                        | N/A                                                                                                                                      | N/A                                                                                                       | N/A                                                                                                                                                                                                                                                                                           |
| Solyc04g011790.1 | monothiol glutaredoxin-S1-like                                       | GRXS1     | AT1G03020                  | Reduces GSH-thiol disulfides                                                                                                             | Increased reduction of GSH-thiol disulfides                                                               | Patterson, Kurt, et al. "Nitrate-regulated glutaredoxins control Arabidopsis primary root growth." <i>Plant Physiology</i> 170.2 (2016): 989-999.                                                                                                                                             |
| Solyc09g006010.2 | pathogenesis-related leaf protein 4                                  | N/A       | N/A                        | Involved in defense response against pathogens                                                                                           | Promoted defense against pathogens                                                                        | van Kan, Jan AL, et al. "Differential accumulation of mRNAs encoding extracellular and intracellular PR proteins in tomato induced by virulent and avirulent races of <i>Cladosporium fulvum</i> ." <i>Plant molecular biology</i> 20.3 (1992): 513-527.                                      |
| Solyc10g083970.1 | S-adenosylmethionine synthase 3-like                                 | METK3     | AT2G36880                  | Catalyzes the formation of S-adenosylmethionine from methionine; Involved in SA-mediated defense; Involved in the biosynthesis of lignin | Increased S-adenosylmethionine production; Promoted early defense response; Increased lignin biosynthesis | Goto, Derek B., et al. "A single-nucleotide mutation in a gene encoding S-adenosylmethionine synthetase is associated with methionine over-accumulation phenotype in <i>Arabidopsis thaliana</i> ." <i>Genes &amp; genetic systems</i> 77.2 (2002): 89-95.                                    |
| Solyc12g008350.2 | dehydration responsive element binding protein                       | DREB      | N/A                        | Transcriptional activator that binds specifically to the C-repeat/DRE element mediating cold-inducible transcription                     | Increased cold acclimation and freezing tolerance                                                         | Alonso-Blanco, Carlos, et al. "Genetic and molecular analyses of natural variation indicate CBF2 as a candidate gene for underlying a freezing tolerance quantitative trait locus in <i>Arabidopsis</i> ." <i>Plant Physiology</i> 139.3 (2005): 1304-1312.                                   |
| Solyc03g007230.3 | protein phosphatase 2C 51-like                                       | AT3G63340 | AT3G63340                  | Metal ion binding; Protein serine/threonine phosphatase activity                                                                         | N/A                                                                                                       | Cheng, Chia-Yi, et al. "Araport11: a complete reannotation of the <i>Arabidopsis thaliana</i> reference genome." <i>The Plant Journal</i> 89.4 (2017): 789-804.                                                                                                                               |
| Solyc01g091360.3 | uncharacterized protein LOC101253424                                 | N/A       | N/A                        | N/A                                                                                                                                      | N/A                                                                                                       | N/A                                                                                                                                                                                                                                                                                           |
| Solyc12g057150.1 | classical arabinogalactan protein 5                                  | AGP5      | AT1G35230                  | Proteoglycan involved in differentiation, cell-cell recognition, embryogenesis, and programmed cell death                                | Promoted plant growth/development and cell differentiation; Promoted programmed cell death                | Thieme, Christoph J., et al. "Endogenous Arabidopsis messenger RNAs transported to distant tissues." <i>Nature Plants</i> 1.4 (2015): 1-9.                                                                                                                                                    |
| Solyc02g083850.3 | calcium-dependent protein kinase 18-like                             | CPK18     | AT4G36070                  | Plays a role in signal transduction pathways that involve calcium as a second messenger                                                  | Promoted calcium-dependent signaling                                                                      | Cheng, Shu-Hua, et al. "Calcium signaling through protein kinases. The Arabidopsis calcium-dependent protein kinase gene family." <i>Plant physiology</i> 129.2 (2002): 469-485.                                                                                                              |
| Solyc07g008380.2 | salutaridinol 7-O-acetyltransferase-like                             | SALAT     | N/A                        | Involved in biosynthesis of morphinan-type benzylisoquinoline alkaloids                                                                  | Increased in biosynthesis of morphinan-type benzylisoquinoline alkaloids                                  | Lenz, Rainer, and Meinhart H. Zenk. "Acetyl coenzyme A: salutaridinol-7-O-acetyltransferase from <i>Papaver somniferum</i> plant cell cultures: The enzyme catalyzing the formation of thebaine in morphine biosynthesis." <i>Journal of Biological Chemistry</i> 270.52 (1995): 31091-31096. |

| TomatoID         | NCBI Protein Name                                                  | Gene ID  | <i>A. Thaliana</i> Homolog | Uniprot Description                                                                                                                                             | Putative Consequences for Infection                                                                                       | Citation                                                                                                                                                                                                                   |
|------------------|--------------------------------------------------------------------|----------|----------------------------|-----------------------------------------------------------------------------------------------------------------------------------------------------------------|---------------------------------------------------------------------------------------------------------------------------|----------------------------------------------------------------------------------------------------------------------------------------------------------------------------------------------------------------------------|
| Solyc00g009760.2 | uncharacterized protein LOC101246232                               | N/A      | N/A                        | N/A                                                                                                                                                             | N/A                                                                                                                       | N/A                                                                                                                                                                                                                        |
| Solyc02g064980.1 | mitogen-activated protein kinase kinase kinase 18-like             | MAPKKK18 | AT1G05100                  | Act as ABA signal transducer under abiotic stress; Promotes stomatal growth/development; Inhibits germination and root growth; Promotes leaf senescence         | Increased response to stress; Increased reproductive development; Decreased growth/development; Increased leaf senescence | Mitula, Filip, et al. "Arabidopsis ABA-activated kinase MAPKKK18 is regulated by protein phosphatase 2C ABI1 and the ubiquitin-proteasome pathway." <i>Plant and Cell Physiology</i> 56.12 (2015): 2351-2367.              |
| Solyc06g075010.3 | ruBisCO large subunit-binding protein subunit alpha, chloroplastic | N/A      | N/A                        | Involved in protein refolding                                                                                                                                   | N/A                                                                                                                       | N/A                                                                                                                                                                                                                        |
| Solyc10g086690.2 | phosphatidylinositol:ceramide inositolphosphotransferase 2         | IPCS2    | AT2G37940                  | Essential for sphingolipid biosynthesis; Plays an important role in modulating plant programmed cell death                                                      | Increased sphingolipid biosynthesis; Promoted programmed cell death                                                       | Wang, Wenming, et al. "An inositolphosphorylceramide synthase is involved in regulation of plant programmed cell death associated with defense in Arabidopsis." <i>The Plant Cell</i> 20.11 (2008): 3163-3179.             |
| Solyc05g008370.1 | probable ribose-5-phosphate isomerase 2                            | RPI2     | AT2G01290                  | Involved in programmed cell death; Involved in vegetative-to-reproductive phase transition in meristems                                                         | Increased primary metabolism; Promoted programmed cell death; Promoted transition from vegetative-to-reproductive phase   | Xiong, Yuqing, et al. "Deficiency in a cytosolic ribose-5-phosphate isomerase causes chloroplast dysfunction, late flowering and premature cell death in Arabidopsis." <i>Physiologia plantarum</i> 137.3 (2009): 249-263. |
| Solyc06g024210.2 | uncharacterized protein LOC101254183                               | N/A      | N/A                        | N/A                                                                                                                                                             | N/A                                                                                                                       | N/A                                                                                                                                                                                                                        |
| Solyc04g016190.1 | zeatin O-glucosyltransferase-like                                  | ZOG1     | AT2G36750                  | Regulates cytokinin activity and storage; Impacts seed growth                                                                                                   | Increased cellular division and plant growth in roots and shoots; Increased reproductive investment                       | Hou, Bingkai, et al. "N-glycosylation of cytokinins by glycosyltransferases of Arabidopsis thaliana." <i>Journal of Biological Chemistry</i> 279.46 (2004): 47822-47832.                                                   |
| Solyc07g008550.3 | probable inactive purple acid phosphatase 27                       | PAP27    | AT5G50400                  | Acid phosphatase activity; Metal ion binding                                                                                                                    | N/A                                                                                                                       | Cheng, Chia-Yi, et al. "Araport11: a complete reannotation of the Arabidopsis thaliana reference genome." <i>The Plant Journal</i> 89.4 (2017): 789-804.                                                                   |
| Solyc03g031620.3 | 5'-adenylsulfate reductase 3, chloroplastic-like                   | APR3     | AT4G21990                  | Reduces sulfate for Cys biosynthesis                                                                                                                            | Increased Cys biosynthesis                                                                                                | Tsakraklides, George, et al. "Sulfate reduction is increased in transgenic Arabidopsis thaliana expressing 5'-adenylsulfate reductase from Pseudomonas aeruginosa." <i>The Plant Journal</i> 32.6 (2002): 879-889.         |
| Solyc06g068650.3 | 4-coumarate--CoA ligase                                            | 4CL1     | AT1G51680                  | Produces CoA thioesters of a variety of hydroxy- and methoxy-substituted cinnamic acids, which are used to synthesize several phenylpropanoid-derived compounds | Increased production of phenylpropanoid-derived compounds                                                                 | Ehltng, Jürgen, Jane JK Shin, and Carl J. Douglas. "Identification of 4-coumarate: coenzyme A ligase (4CL) substrate recognition domains." <i>The Plant Journal</i> 27.5 (2001): 455-465.                                  |
| Solyc09g075890.3 | uncharacterized protein LOC101255829                               | N/A      | N/A                        | N/A                                                                                                                                                             | N/A                                                                                                                       | N/A                                                                                                                                                                                                                        |

| TomatoID         | NCBI Protein Name                           | Gene ID | A. Thaliana Homolog | Uniprot Description                                                                                | Putative Consequences for Infection                                                                 | Citation                                                                                                                                                                                                                                                                            |
|------------------|---------------------------------------------|---------|---------------------|----------------------------------------------------------------------------------------------------|-----------------------------------------------------------------------------------------------------|-------------------------------------------------------------------------------------------------------------------------------------------------------------------------------------------------------------------------------------------------------------------------------------|
| Solyc10g079350.2 | zeatin O-glucosyltransferase-like           | ZOG1    | AT2G36750           | Regulates cytokinin activity and storage; Impacts seed growth                                      | Increased cellular division and plant growth in roots and shoots; Increased reproductive investment | Hou, Bingkai, et al. "N-glucosylation of cytokinins by glycosyltransferases of Arabidopsis thaliana." Journal of Biological Chemistry 279.46 (2004): 47822-47832.                                                                                                                   |
| Solyc04g074470.1 | protein EXORDIUM-like 2                     | EXL2    | AT5G64260           | Plays a role in a brassinosteroid-dependent regulation of growth/development                       | Increased regulation of leaf and root growth/development                                            | Schröder, Florian, et al. "The extracellular EXO protein mediates cell expansion in Arabidopsis leaves." BMC plant biology 9.1 (2009): 20.                                                                                                                                          |
| Solyc08g062330.3 | ankyrin repeat-containing protein ITN1-like | ITN1    | AT3G12360           | Involved in salt stress tolerance; Acts through ABA signaling pathways and promotes ROS production | Increased salt stress tolerance; Increased ROS production                                           | Sakamoto, Hikaru, Osamu Matsuda, and Koh Iba. "ITN1, a novel gene encoding an ankyrin-repeat protein that affects the ABA-mediated production of reactive oxygen species and is involved in salt-stress tolerance in Arabidopsis thaliana." The Plant Journal 56.3 (2008): 411-422. |
| Solyc12g099400.2 | uncharacterized protein LOC101264805        | N/A     | N/A                 | N/A                                                                                                | N/A                                                                                                 | N/A                                                                                                                                                                                                                                                                                 |
| Solyc01g105890.3 | linalool synthase                           | N/A     | N/A                 | N/A                                                                                                | N/A                                                                                                 | N/A                                                                                                                                                                                                                                                                                 |
| Solyc06g068960.1 | calcium-binding allergen Ole e 8            | N/A     | N/A                 | N/A                                                                                                | N/A                                                                                                 | Ledesma, Amalia, Mayte Villalba, and Rosalia Rodríguez. "Cloning, expression and characterization of a novel four EF-hand Ca2+-binding protein from olive pollen with allergenic activity." FEBS letters 466.1 (2000): 192-196.                                                     |
| Solyc08g068680.3 | aromatic amino acid decarboxylase 1A        | AADC1A  | N/A                 | Involved in carboxylic acid metabolic process                                                      | Increased carboxylic acid metabolism                                                                | Tieman, Denise, et al. "Tomato aromatic amino acid decarboxylases participate in synthesis of the flavor volatiles 2-phenylethanol and 2-phenylacetaldehyde." Proceedings of the National Academy of Sciences 103.21 (2006): 8287-8292.                                             |
| Solyc02g032860.3 | 5'-adenylsulfate reductase 3, chloroplastic | APR3    | AT4G21990           | Reduces sulfate for Cys biosynthesis                                                               | Increased Cys biosynthesis                                                                          | Tsakraklides, George, et al. "Sulfate reduction is increased in transgenic Arabidopsis thaliana expressing 5'-adenylsulfate reductase from Pseudomonas aeruginosa." The Plant Journal 32.6 (2002): 879-889.                                                                         |
| Solyc02g070040.1 | uncharacterized protein LOC101257038        | N/A     | N/A                 | N/A                                                                                                | N/A                                                                                                 | N/A                                                                                                                                                                                                                                                                                 |
| Solyc03g083680.1 | N/A                                         | N/A     | N/A                 | N/A                                                                                                | N/A                                                                                                 | N/A                                                                                                                                                                                                                                                                                 |
| Solyc05g010420.2 | S-adenosylmethionine decarboxylase          | N/A     | N/A                 | Adenosylmethionine decarboxylase activity                                                          | N/A                                                                                                 | N/A                                                                                                                                                                                                                                                                                 |
| Solyc12g097000.2 | TMV resistance protein N-like               | N       | N/A                 | Disease resistance protein; Triggers plant defense systems, including the hypersensitive response  | Increased hypersensitive response                                                                   | Dinesh-Kumar, S. P., and Barbara J. Baker. "Alternatively spliced N resistance gene transcripts: their possible role in tobacco mosaic virus resistance." Proceedings of the National Academy of Sciences 97.4 (2000): 1908-1913.                                                   |

| TomatoID         | NCBI Protein Name                                                     | Gene ID   | <i>A. Thaliana</i> Homolog | Uniprot Description                                                                                                                                          | Putative Consequences for Infection                                                                                 | Citation                                                                                                                                                                                                                            |
|------------------|-----------------------------------------------------------------------|-----------|----------------------------|--------------------------------------------------------------------------------------------------------------------------------------------------------------|---------------------------------------------------------------------------------------------------------------------|-------------------------------------------------------------------------------------------------------------------------------------------------------------------------------------------------------------------------------------|
| Solyc00g028960.1 | monothiol glutaredoxin-S1-like                                        | GRXS1     | AT1G03020                  | Reduces GSH-thiol disulfides                                                                                                                                 | Increased reduction of GSH-thiol disulfides                                                                         | Patterson, Kurt, et al. "Nitrate-regulated glutaredoxins control Arabidopsis primary root growth." <i>Plant Physiology</i> 170.2 (2016): 989-999.                                                                                   |
| Solyc02g077110.3 | phospholipase A1-II 1-like                                            | Osl_03083 | N/A                        | Acylhydrolase that catalyzes the hydrolysis of phospholipids at the sn-1 position; Involved in lipid catabolism                                              | Increased lipid catabolism                                                                                          | Yu, Jun, et al. "The genomes of <i>Oryza sativa</i> : a history of duplications." <i>PLoS Biol</i> 3.2 (2005): e38.                                                                                                                 |
| Solyc03g111100.1 | uncharacterized protein LOC101267981                                  | N/A       | N/A                        | N/A                                                                                                                                                          | N/A                                                                                                                 | N/A                                                                                                                                                                                                                                 |
| Solyc04g008330.1 | zeatin O-glucosyltransferase-like                                     | ZOG1      | AT2G36750                  | Regulates cytokinin activity and storage; Impacts seed growth                                                                                                | Increased cellular division and plant growth in roots and shoots; Increased reproductive investment                 | Hou, Bingkai, et al. "N-glucosylation of cytokinins by glucosyltransferases of <i>Arabidopsis thaliana</i> ." <i>Journal of Biological Chemistry</i> 279.46 (2004): 47822-47832.                                                    |
| Solyc06g082440.1 | CBL-interacting protein kinase 11                                     | CIPK11    | AT2G30360                  | Acts as a negative regulator of the plasma membrane proton pump <i>AHA2</i> by preventing its interaction with 14-3-3 protein                                | Increased activity of plasma membrane proton pump                                                                   | Fuglsang, Anja T., et al. "Arabidopsis protein kinase PK55 inhibits the plasma membrane H <sup>+</sup> -ATPase by preventing interaction with 14-3-3 protein." <i>The Plant Cell</i> 19.5 (2007): 1617-1634.                        |
| Solyc08g074683.1 | N/A                                                                   | N/A       | N/A                        | N/A                                                                                                                                                          | N/A                                                                                                                 | N/A                                                                                                                                                                                                                                 |
| Solyc03g098720.3 | kunitz-type serine protease inhibitor DrTI-like                       | N/A       | N/A                        | Serine protease inhibitor that inhibits chymotrypsin                                                                                                         | Increased protein degradation                                                                                       | Chang, Long-sen, et al. "Purification and characterization of a chymotrypsin inhibitor from the venom of <i>Ophiophagus hannah</i> (King Cobra)." <i>Biochemical and biophysical research communications</i> 283.4 (2001): 862-867. |
| Solyc03g120660.3 | uncharacterized protein LOC101263391                                  | N/A       | N/A                        | N/A                                                                                                                                                          | N/A                                                                                                                 | N/A                                                                                                                                                                                                                                 |
| Solyc07g018010.3 | transcription factor bHLH35                                           | BHLH35    | AT5G57150                  | Involved in regulation of transcription                                                                                                                      | N/A                                                                                                                 | Heim, Marc A., et al. "The basic helix-loop-helix transcription factor family in plants: a genome-wide study of protein structure and functional diversity." <i>Molecular biology and evolution</i> 20.5 (2003): 735-747.           |
| Solyc07g062700.3 | sodium/calcium exchanger NCL                                          | NCL       | AT1G53210                  | Participates in the maintenance of calcium homeostasis; Plays a role in auxin response, diurnal rhythm, and flowering time; Involved in salt stress response | Promoted calcium homeostasis; Increased response to auxin; Promoted circadian rhythm; Promoted salt stress response | Wang, Peng, et al. "A Na <sup>+</sup> /Ca <sup>2+</sup> exchanger-like protein (AtNCL) involved in salt stress in <i>Arabidopsis</i> ." <i>Journal of Biological Chemistry</i> 287.53 (2012): 44062-44070.                          |
| Solyc08g068770.2 | N-hydroxycinnamoyl-CoA:tyramine N-hydroxycinnamoyl transferase THT1-3 | THT1-3    | N/A                        | Involved in the production of p-Coumaroylnoradrenaline                                                                                                       | Increased defense against pathogens                                                                                 | von Roepenack-Lahaye, Edda, et al. "p-Coumaroylnoradrenaline, a novel plant metabolite implicated in tomato defense against pathogens." <i>Journal of Biological Chemistry</i> 278.44 (2003): 43373-43383.                          |
| Solyc08g080585.1 | N/A                                                                   | N/A       | N/A                        | N/A                                                                                                                                                          | N/A                                                                                                                 | N/A                                                                                                                                                                                                                                 |

| TomatoID         | NCBI Protein Name                                 | Gene ID      | <i>A. Thaliana</i> Homolog | Uniprot Description                                                                                                                                                              | Putative Consequences for Infection                                                                         | Citation                                                                                                                                                                                                                                                           |
|------------------|---------------------------------------------------|--------------|----------------------------|----------------------------------------------------------------------------------------------------------------------------------------------------------------------------------|-------------------------------------------------------------------------------------------------------------|--------------------------------------------------------------------------------------------------------------------------------------------------------------------------------------------------------------------------------------------------------------------|
| Solyc08g080590.3 | thaumatin-like protein                            | TLP1         | AT4G24180                  | Involved in local responses of roots to colonization by non-pathogenic plant growth-promoting rhizobacteria                                                                      | Increased colonization of growth-promoting rhizobacteria                                                    | Leon-Kloosterziel, Karen M., et al. "Colonization of the Arabidopsis rhizosphere by fluorescent Pseudomonas spp. activates a root-specific, ethylene-responsive PR-5 gene in the vascular bundle." <i>Plant molecular biology</i> 57.5 (2005): 731-748.            |
| Solyc12g099260.2 | ATP-citrate synthase beta chain protein 2-like    | ACLA-2       | AT1G60810                  | Used for the elongation of fatty acids and biosynthesis of isoprenoids, flavonoids, and malonated derivatives; Required for normal growth and development in seeds               | Promoted seed development; Increased production of primary metabolites                                      | Fatland, Beth L., Basil J. Nikolau, and Eve Syrkin Wurtele. "Reverse genetic characterization of cytosolic acetyl-CoA generation by ATP-citrate lyase in Arabidopsis." <i>The Plant Cell</i> 17.1 (2005): 182-203.                                                 |
| Solyc02g089900.1 | lysM domain receptor-like kinase 4                | LYK4         | AT2G23770                  | Lysin motif receptor kinase that functions as a cell surface receptor in chitin elicitor signaling leading to innate immunity against certain fungal and bacterial pathogens     | Promoted innate immunity; Increased resistance to certain fungal and bacterial pathogens                    | Wan, Jinrong, et al. "LYK4, a lysin motif receptor-like kinase, is important for chitin signaling and plant innate immunity in Arabidopsis." <i>Plant physiology</i> 160.1 (2012): 396-406.                                                                        |
| Solyc02g093250.3 | caffeoyl-CoA O-methyltransferase-like             | CCOAMT1      | AT4G34050                  | Involved in the reinforcement of the plant cell wall; Involved in response to wounding or pathogen challenge by promoting the formation of cell wall-bound ferulic acid polymers | Increased production of polysaccharides; Reinforced cell wall; Increased response to wounding and pathogens | Do, Cao-Trung, et al. "Both caffeoyl Coenzyme A 3-O-methyltransferase 1 and caffeic acid O-methyltransferase 1 are involved in redundant functions for lignin, flavonoids and sinapoyl malate biosynthesis in Arabidopsis." <i>Planta</i> 226.5 (2007): 1117-1129. |
| Solyc04g076307.1 | N/A                                               | N/A          | N/A                        | N/A                                                                                                                                                                              | N/A                                                                                                         | N/A                                                                                                                                                                                                                                                                |
| Solyc06g062920.3 | auxin-regulated dual specificity cytosolic kinase | N/A          | N/A                        | N/A                                                                                                                                                                              | N/A                                                                                                         | N/A                                                                                                                                                                                                                                                                |
| Solyc01g096430.3 | NAD(P)H:quinone oxidoreductase                    | NQR          | AT3G27890                  | Serves as a quinone reductase in connection with conjugation reactions of hydroquinones involved in detoxification                                                               | Increased detoxification                                                                                    | Sparla, Francesca, et al. "Cloning and heterologous expression of NAD(P)H:quinone reductase of Arabidopsis thaliana, a functional homologue of animal DT-diaphorase." <i>FEBS letters</i> 463.3 (1999): 382-386.                                                   |
| Solyc04g011840.1 | monothiol glutaredoxin-S1-like                    | GRXS1        | AT1G03020                  | Reduces GSH-thiol disulfides                                                                                                                                                     | Increased reduction of GSH-thiol disulfides                                                                 | Patterson, Kurt, et al. "Nitrate-regulated glutaredoxins control Arabidopsis primary root growth." <i>Plant Physiology</i> 170.2 (2016): 989-999.                                                                                                                  |
| Solyc10g075160.1 | ferredoxin                                        | AT1G32550    | AT1G32550                  | Ferredoxins are iron-sulfur proteins that transfer electrons in a wide variety of metabolic reactions                                                                            | Promoted metabolism                                                                                         | Zapata, Luis, et al. "Chromosome-level assembly of Arabidopsis thaliana Ler reveals the extent of translocation and inversion polymorphisms." <i>Proceedings of the National Academy of Sciences</i> 113.28 (2016): E4052-E4060.                                   |
| Solyc03g007960.3 | Beta-carotene 3-hydroxylase 1, chloroplastic      | BETA-OHASE 1 | AT4G25700                  | Nonheme diiron monooxygenase involved in the biosynthesis of xanthophylls                                                                                                        | Increased biosynthesis of xanthophylls; Increased pigment production                                        | Sun, Zairen, Elisabeth Gantt, and Francis X. Cunningham. "Cloning and functional analysis of the $\beta$ -carotene hydroxylase of Arabidopsis thaliana." <i>Journal of Biological Chemistry</i> 271.40 (1996): 24349-24352.                                        |

| TomatoID         | NCBI Protein Name                                    | Gene ID   | A. Thaliana Homolog | Uniprot Description                                                                                                                      | Putative Consequences for Infection                                     | Citation                                                                                                                                                                                                                    |
|------------------|------------------------------------------------------|-----------|---------------------|------------------------------------------------------------------------------------------------------------------------------------------|-------------------------------------------------------------------------|-----------------------------------------------------------------------------------------------------------------------------------------------------------------------------------------------------------------------------|
| Solyc06g075000.3 | uncharacterized protein LOC101265549                 | N/A       | N/A                 | N/A                                                                                                                                      | N/A                                                                     | N/A                                                                                                                                                                                                                         |
| Solyc10g006700.1 | calcium-binding protein PBP1                         | PBP1      | AT5G54490           | Potential calcium sensor                                                                                                                 | Promoted calcium sensing; Promoted regulation of trichome morphogenesis | Reddy, Vaka S., et al. "KIC, a novel Ca <sup>2+</sup> binding protein with one EF-hand motif, interacts with a microtubule motor protein and regulates trichome morphogenesis." <i>The Plant Cell</i> 16.1 (2004): 185-200. |
| Solyc12g088190.2 | amino acid permease 6                                | AAP6      | AT5G49630           | Involved in the uptake of amino acids diffusing out of the xylem tracheids into the xylem parenchyma                                     | Increased amino acid uptake and mobilization                            | Okumoto, Sakiko, et al. "High affinity amino acid transporters specifically expressed in xylem parenchyma and developing seeds of Arabidopsis." <i>Journal of Biological Chemistry</i> 277.47 (2002): 45338-45346.          |
| Solyc05g056170.3 | phenylalanine ammonia-lyase 2                        | PAL2      | AT3G53260           | Enzyme of plant metabolism catalyzing the first reaction in the biosynthesis of a wide variety of natural products                       | Increased biosynthesis of L-phenylalanine derivatives                   | Cochrane, Fiona C., Laurence B. Davin, and Norman G. Lewis. "The Arabidopsis phenylalanine ammonia lyase gene family: kinetic characterization of the four PAL isoforms." <i>Phytochemistry</i> 65.11 (2004): 1557-1564.    |
| Solyc09g007260.3 | ethylene-responsive transcription factor RAP2-7-like | RAP2-7    | AT2G28550           | Regulates gene expression under stress; Negatively regulates flowering                                                                   | Increased response to stress and pathogenesis; Flowering delay          | Riechmann, José Luis, et al. "Arabidopsis transcription factors: genome-wide comparative analysis among eukaryotes." <i>Science</i> 290.5499 (2000): 2105-2110.                                                             |
| Solyc01g079940.3 | basic 7S globulin                                    | BG        | N/A                 | Seed storage protein; Protein kinase activity; Binds leginsulin                                                                          | Promoted seed development                                               | Kagawa, Hiroyuki, and Hisashi Hirano. "Sequence of a cDNA encoding soybean basic 7S globulin." <i>Nucleic acids research</i> 17.21 (1989): 8868.                                                                            |
| Solyc01g086800.3 | histone H3.2                                         | HTR2      | AT3G27360           | Core component of the nucleosome; Plays central roles in transcription regulation, DNA repair, DNA replication and chromosomal stability | Increased transcription regulation and DNA repair                       | Seki, Motoaki, et al. "Functional annotation of a full-length Arabidopsis cDNA collection." <i>Science</i> 296.5565 (2002): 141-145.                                                                                        |
| Solyc01g087570.2 | N/A                                                  | N/A       | N/A                 | N/A                                                                                                                                      | N/A                                                                     | N/A                                                                                                                                                                                                                         |
| Solyc03g117870.3 | 4-coumarate--CoA ligase                              | 4CL1      | AT1G51680           | Produces CoA thioesters of a variety of hydroxy- and methoxy-substituted cinnamic acids                                                  | Increased production of phenylpropanoid-derived compounds               | Ehrling, Jürgen, Jane JK Shin, and Carl J. Douglas. "Identification of 4-coumarate: coenzyme A ligase (4CL) substrate recognition domains." <i>The Plant Journal</i> 27.5 (2001): 455-465.                                  |
| Solyc08g076980.3 | acetylornithine deacetylase-like                     | AT4G17830 | AT4G17830           | Involved in flowering and fruit development                                                                                              | Promoted flowering and fruit development                                | Molesini, Barbara, et al. "Involvement of the putative N-acetylornithine deacetylase from Arabidopsis thaliana in flowering and fruit development." <i>Plant and Cell Physiology</i> 56.6 (2015): 1084-1096.                |
| Solyc02g071620.3 | GDSL esterase/lipase At1g29670                       | AT1G29670 | AT1G29670           | Hydralose/esterase activity                                                                                                              | N/A                                                                     | Sierro, Nicolas, et al. "The tobacco genome sequence and its comparison with those of tomato and potato." <i>Nature communications</i> 5.1 (2014): 1-9.                                                                     |
| Solyc03g005470.3 | uncharacterized protein LOC101261585                 | N/A       | N/A                 | N/A                                                                                                                                      | N/A                                                                     | N/A                                                                                                                                                                                                                         |
| Solyc12g009925.1 | N/A                                                  | N/A       | N/A                 | N/A                                                                                                                                      | N/A                                                                     | N/A                                                                                                                                                                                                                         |

| TomatoID         | NCBI Protein Name                                                            | Gene ID   | A. Thaliana Homolog | Uniprot Description                                                                                                                                                         | Putative Consequences for Infection                                                                                                                                       | Citation                                                                                                                                                                                                                                     |
|------------------|------------------------------------------------------------------------------|-----------|---------------------|-----------------------------------------------------------------------------------------------------------------------------------------------------------------------------|---------------------------------------------------------------------------------------------------------------------------------------------------------------------------|----------------------------------------------------------------------------------------------------------------------------------------------------------------------------------------------------------------------------------------------|
| Solyc03g112880.1 | fasciclin-like arabinogalactan protein 4                                     | FLA4      | AT3G46550           | Cell surface adhesion protein required for normal cell expansion                                                                                                            | Increased cell expansion                                                                                                                                                  | Xu, Shou-Ling, et al. "Two leucine-rich repeat receptor kinases mediate signaling, linking cell wall biosynthesis and ACC synthase in Arabidopsis." <i>The Plant Cell</i> 20.11 (2008): 3065-3079.                                           |
| Solyc07g006480.3 | probably inactive leucine-rich repeat receptor-like protein kinase At5g48380 | AT5G48380 | AT5G48380           | Negative regulator of defense response to bacteria; Negative regulator of programmed cell death                                                                             | Impaired defense response to bacteria; Impaired programmed cell death                                                                                                     | Gao, Minghui, et al. "Regulation of cell death and innate immunity by two receptor-like kinases in Arabidopsis." <i>Cell host &amp; microbe</i> 6.1 (2009): 34-44.                                                                           |
| Solyc07g043500.1 | beta-D-glucosyl crocetin beta-1,6-glucosyltransferase                        | UGT94E5   | N/A                 | Glucosyltransferase catalyzing crocetin gentiobiosyl esters biosynthesis                                                                                                    | Promoted production of crocetin and crocin; Increased pigment production                                                                                                  | Nagatoshi, Mai, et al. "UGT75L6 and UGT94E5 mediate sequential glucosylation of crocetin to crocin in <i>Gardenia jasminoides</i> ." <i>FEBS letters</i> 586.7 (2012): 1055-1061.                                                            |
| Solyc01g066760.2 | uncharacterized protein LOC101255730                                         | N/A       | N/A                 | N/A                                                                                                                                                                         | N/A                                                                                                                                                                       | N/A                                                                                                                                                                                                                                          |
| Solyc01g091465.1 | N/A                                                                          | N/A       | N/A                 | N/A                                                                                                                                                                         | N/A                                                                                                                                                                       | N/A                                                                                                                                                                                                                                          |
| Solyc09g014280.1 | uncharacterized acetyltransferase At3g50280                                  | AT3G50280 | AT3G50280           | N/A                                                                                                                                                                         | N/A                                                                                                                                                                       | N/A                                                                                                                                                                                                                                          |
| Solyc02g092790.3 | Classical arabinogalactan protein 1                                          | AGP1      | AT5G64310           | Proteoglycan implicated in diverse developmental roles such as differentiation, cell-cell recognition, embryogenesis, and programmed cell death                             | Promoted growth/development                                                                                                                                               | Vergnolle, Chantal, et al. "The cold-induced early activation of phospholipase C and D pathways determines the response of two distinct clusters of genes in Arabidopsis cell suspensions." <i>Plant physiology</i> 139.3 (2005): 1217-1233. |
| Solyc03g120990.3 | NADP-dependent malic enzyme, chloroplastic                                   | ME6       | N/A                 | Cecarboxylates malate shuttled from neighboring mesophyll cells; CO2 released is refixed by RuBisCo; Eliminates the photorespiratory loss of CO2 that occurs in most plants | Promoted photorespiratory efficiency of CO2 loss                                                                                                                          | Cheng, Yuxiang, et al. "Expression, purification, and characterization of two NADP-malic enzymes of rice ( <i>Oryza sativa</i> L.) in <i>Escherichia coli</i> ." <i>Protein expression and purification</i> 45.1 (2006): 200-205.            |
| Solyc04g071890.3 | peroxidase 12 precursor                                                      | PER12     | AT1G71695           | Involved in removal of H2O2, oxidation of toxic reductants, biosynthesis and degradation of lignin, suberization, auxin catabolism, and response to environmental stressors | Increased removal of H2O2, oxidation of toxic reductants, biosynthesis and degradation of lignin, suberization, auxin catabolism, and response to environmental stressors | Paynel, Florence, et al. "Temporal regulation of cell-wall pectin methylesterase and peroxidase isoforms in cadmium-treated flax hypocotyl." <i>Annals of botany</i> 104.7 (2009): 1363-1372.                                                |
| Solyc01g096320.3 | homeobox-leucine zipper protein ATHB-12                                      | ATHB-12   | AT3G61890           | Transcription activator that acts as a growth regulator in response to water deficit                                                                                        | Increased regulation of growth/development; Increased response to drought                                                                                                 | Olsson, Anna, Peter Engström, and Eva Söderman. "The homeobox genes ATHB12 and ATHB7 encode potential regulators of growth in response to water deficit in Arabidopsis." <i>Plant molecular biology</i> 55.5 (2004): 663-677.                |
| Solyc02g083120.2 | uncharacterized protein LOC101250469                                         | N/A       | N/A                 | N/A                                                                                                                                                                         | N/A                                                                                                                                                                       | N/A                                                                                                                                                                                                                                          |

| TomatoID         | NCBI Protein Name                               | Gene ID      | <i>A. Thaliana</i> Homolog | Uniprot Description                                                                                                                                                              | Putative Consequences for Infection                                                                         | Citation                                                                                                                                                                                                                                                           |
|------------------|-------------------------------------------------|--------------|----------------------------|----------------------------------------------------------------------------------------------------------------------------------------------------------------------------------|-------------------------------------------------------------------------------------------------------------|--------------------------------------------------------------------------------------------------------------------------------------------------------------------------------------------------------------------------------------------------------------------|
| Solyc04g011830.1 | monothiol glutaredoxin-S1-like                  | GRXS1        | AT1G03020                  | Reduces GSH-thiol disulfides                                                                                                                                                     | Increased reduction of GSH-thiol disulfides                                                                 | Patterson, Kurt, et al. "Nitrate-regulated glutaredoxins control Arabidopsis primary root growth." <i>Plant Physiology</i> 170.2 (2016): 989-999.                                                                                                                  |
| Solyc08g067505.1 | N/A                                             | N/A          | N/A                        | N/A                                                                                                                                                                              | N/A                                                                                                         | N/A                                                                                                                                                                                                                                                                |
| Solyc11g005150.2 | leucine-rich repeat extensin-like protein 6     | LRX6         | AT3G22800                  | Modulates cell morphogenesis by regulating cell wall formation and assembly, and/or growth polarization                                                                          | Promoted cell morphogenesis/regulation of cell wall formation and assembly, and/or growth polarization      | Cheng, Hui, et al. "Gibberellin acts through jasmonate to control the expression of MYB21, MYB24, and MYB57 to promote stamen filament growth in Arabidopsis." <i>PLoS Genet</i> 5.3 (2009): e1000440.                                                             |
| Solyc00g010525.1 | N/A                                             | N/A          | N/A                        | N/A                                                                                                                                                                              | N/A                                                                                                         | N/A                                                                                                                                                                                                                                                                |
| Solyc02g093270.3 | caffeoyl-CoA O-methyltransferase-like           | CCOAMT1      | AT4G34050                  | Involved in the reinforcement of the plant cell wall; Involved in response to wounding or pathogen challenge by promoting the formation of cell wall-bound ferulic acid polymers | Increased production of polysaccharides; Reinforced cell wall; Increased response to wounding and pathogens | Do, Cao-Trung, et al. "Both caffeoyl Coenzyme A 3-O-methyltransferase 1 and caffeic acid O-methyltransferase 1 are involved in redundant functions for lignin, flavonoids and sinapoyl malate biosynthesis in Arabidopsis." <i>Planta</i> 226.5 (2007): 1117-1129. |
| Solyc03g115380.2 | UDP-glucose 6-dehydrogenase 1-like              | UGD1         | AT1G26570                  | Involved in the biosynthesis of UDP-glucuronic acid, providing nucleotide sugars for cell-wall polymers                                                                          | Increased nucleotide transport for cell-wall polymers                                                       | Oka, Takuji, and Yoshifumi Jigami. "Reconstruction of de novo pathway for synthesis of UDP-glucuronic acid and UDP-xylose from intrinsic UDP-glucose in <i>Saccharomyces cerevisiae</i> ." <i>The FEBS journal</i> 273.12 (2006): 2645-2657.                       |
| Solyc03g116510.1 | uncharacterized protein LOC104646577            | N/A          | N/A                        | N/A                                                                                                                                                                              | N/A                                                                                                         | N/A                                                                                                                                                                                                                                                                |
| Solyc11g006910.2 | ferredoxin, root R-B2                           | N/A          | N/A                        | Ferredoxins are iron-sulfur proteins that transfer electrons in a wide variety of metabolic reactions                                                                            | Promoted metabolism                                                                                         | Wada, Keishiro, Masaaki Onda, and Hiroshi Matsubara. "Amino acid sequences of ferredoxin isoproteins from radish roots." <i>The Journal of Biochemistry</i> 105.4 (1989): 619-625.                                                                                 |
| Solyc02g088630.3 | probable galacturonosyltransferase 14           | GAUT14       | AT5G15470                  | Involved in pectin and/or xylans biosynthesis in cell walls                                                                                                                      | Increased pectin and xylan biosynthesis; Increased cell wall expansion                                      | Wang, Li, et al. "Arabidopsis galacturonosyltransferase (GAUT) 13 and GAUT14 have redundant functions in pollen tube growth." <i>Molecular plant</i> 6.4 (2013): 1131-1148.                                                                                        |
| Solyc03g097750.3 | translocon-associated protein subunit beta-like | LOC109001308 | N/A                        | N/A                                                                                                                                                                              | N/A                                                                                                         | Martínez-García, Pedro J., et al. "The walnut ( <i>Juglans regia</i> ) genome sequence reveals diversity in genes coding for the biosynthesis of non-structural polyphenols." <i>The Plant Journal</i> 87.5 (2016): 507-532.                                       |
| Solyc01g009160.2 | harpin-induced1-like                            | OS12G06210   | N/A                        | N/A                                                                                                                                                                              | N/A                                                                                                         | Sakai, Hiroaki, et al. "Rice Annotation Project Database (RAP-DB): an integrative and interactive database for rice genomics." <i>Plant and Cell Physiology</i> 54.2 (2013): e6-e6.                                                                                |
| Solyc07g049370.2 | glucan endo-1,3-beta-glucosidase 12             | AT4G29360    | AT4G29360                  | Involved in carbohydrate metabolic process, cell wall organization, and plant defense response                                                                                   | Increased carbohydrate metabolism, cell wall organization, and plant defense response                       | Wu, Qiong, et al. "Long-term balancing selection contributes to adaptation in Arabidopsis and its relatives." <i>Genome biology</i> 18.1 (2017): 1-15.                                                                                                             |

| TomatoID         | NCBI Protein Name                                                | Gene ID   | A. Thaliana Homolog | Uniprot Description                                                                                                                                                                                                     | Putative Consequences for Infection                                                                                                                                                                          | Citation                                                                                                                                                                                                                                                              |
|------------------|------------------------------------------------------------------|-----------|---------------------|-------------------------------------------------------------------------------------------------------------------------------------------------------------------------------------------------------------------------|--------------------------------------------------------------------------------------------------------------------------------------------------------------------------------------------------------------|-----------------------------------------------------------------------------------------------------------------------------------------------------------------------------------------------------------------------------------------------------------------------|
| Solyc09g064820.1 | EID1-like F-box protein 3                                        | EDL3      | AT3G63060           | Involved in the following processes: ABA-activated signaling pathway, regulation of seed germination, response to osmotic stress, response to salt stress, response to water deprivation, and meristem phase transition | Increased ABA-activated signaling; Increased regulation of seed germination; Promoted response to osmotic, salt, and water stress; Promoted transition from vegetative to reproductive phase in the meristem | Friso, Giulia, et al. "In-depth analysis of the thylakoid membrane proteome of Arabidopsis thaliana chloroplasts: new proteins, new functions, and a plastid proteome database." <i>The Plant Cell</i> 16.2 (2004): 478-499.                                          |
| Solyc02g069110.3 | cathepsin B-like protease 2                                      | CATHB2    | AT1G02305           | Thiol protease that plays a central role in plant programmed cell death; Required for full levels of PCD during resistance gene-mediated hypersensitive response                                                        | Increased initiation of programmed cell death; Promoted hypersensitive response                                                                                                                              | Theologis, Athanasios, et al. "Sequence and analysis of chromosome 1 of the plant Arabidopsis thaliana." <i>Nature</i> 408.6814 (2000): 816-820.                                                                                                                      |
| Solyc10g078360.2 | uncharacterized protein LOC101265973                             | N/A       | N/A                 | N/A                                                                                                                                                                                                                     | N/A                                                                                                                                                                                                          | N/A                                                                                                                                                                                                                                                                   |
| Solyc06g060690.2 | non-functional pseudokinase ZED1 isoform X1                      | ZED1      | AT3G57750           | Involved in the regulation of the ambient temperature-sensitive intersection of growth and immune response                                                                                                              | Repressed regulation of temperature-sensitive intersection of growth and immune response                                                                                                                     | Lewis, Jennifer D., et al. "The Arabidopsis ZED1 pseudokinase is required for ZAR1-mediated immunity induced by the Pseudomonas syringae type III effector HopZ1a." <i>Proceedings of the National Academy of Sciences</i> 110.46 (2013): 18722-18727.                |
| Solyc07g053230.3 | transcription factor MYB15-like                                  | MYB15     | AT3G23250           | Transcription factor involved in cold-regulation of CBF genes and in freezing tolerance; Involved in drought and salt tolerance; Enhances ABA biosynthesis and signaling                                                | Promoted freezing, drought, and salt tolerance; Enhanced ABA biosynthesis and signaling                                                                                                                      | Agarwal, Manu, et al. "A R2R3 type MYB transcription factor is involved in the cold regulation of CBF genes and in acquired freezing tolerance." <i>Journal of Biological Chemistry</i> 281.49 (2006): 37636-37645.                                                   |
| Solyc01g087850.2 | subtilisin-like protease precursor                               | N/A       | N/A                 | N/A                                                                                                                                                                                                                     | N/A                                                                                                                                                                                                          | N/A                                                                                                                                                                                                                                                                   |
| Solyc01g006320.3 | protein NDR1-like                                                | NRD1      | AT3G20600           | Required for disease resistance conferred by R genes recognizing bacterial and oomycete pathogens; Required for the establishment of hypersensitive response and SAR                                                    | Promoted disease resistance against bacterial and fungal pathogens; Promoted hypersensitive response; Promoted SAR                                                                                           | Century, Karen S., Eric B. Holub, and Brian J. Staskawicz. "NDR1, a locus of Arabidopsis thaliana that is required for disease resistance to both a bacterial and a fungal pathogen." <i>Proceedings of the National Academy of Sciences</i> 92.14 (1995): 6597-6601. |
| Solyc06g051010.1 | peptide-N4-(N-acetyl-beta-glucosaminyl)asparagine amidase A-like | N/A       | N/A                 | Peptide-N4-(N-acetyl-beta-glucosaminyl)asparagine amidase                                                                                                                                                               | N/A                                                                                                                                                                                                          | Altmann, Friedrich, et al. "Characterisation of peptide-N4-(N-acetyl-beta-glucosaminyl) asparagine amidase A and its N-glycans." <i>European journal of biochemistry</i> 252.1 (1998): 118-123.                                                                       |
| Solyc09g061890.3 | probable pectate lyase 8                                         | AT3G07010 | AT3G07010           | Involved in pectin catabolic process                                                                                                                                                                                    | Increased pectin catabolism                                                                                                                                                                                  | Weber, Hans, et al. "Selective and powerful stress gene expression in Arabidopsis in response to malondialdehyde." <i>The Plant Journal</i> 37.6 (2004): 877-888.                                                                                                     |

| TomatoID         | NCBI Protein Name                                 | Gene ID | A. Thaliana Homolog | Uniprot Description                                                                                             | Putative Consequences for Infection                                                  | Citation                                                                                                                                                                                                               |
|------------------|---------------------------------------------------|---------|---------------------|-----------------------------------------------------------------------------------------------------------------|--------------------------------------------------------------------------------------|------------------------------------------------------------------------------------------------------------------------------------------------------------------------------------------------------------------------|
| Solyc03g083010.3 | uncharacterized protein LOC101261000 isoform X3   | N/A     | N/A                 | N/A                                                                                                             | N/A                                                                                  | N/A                                                                                                                                                                                                                    |
| Solyc11g072600.2 | AP2 transcription factor SIAP2d isoform X1        | N/A     | N/A                 | DNA-binding transcription factor; Involved in tomato fruit ripening                                             | Increased tomato ripening                                                            | Karlova, Romyana, et al. "Transcriptome and metabolite profiling show that APETALA2a is a major regulator of tomato fruit ripening." <i>The Plant Cell</i> 23.3 (2011): 923-941.                                       |
| Solyc03g083720.1 | 21 kDa protein-like                               | N/A     | N/A                 | N/A                                                                                                             | N/A                                                                                  | N/A                                                                                                                                                                                                                    |
| Solyc06g069380.3 | O-fucosyltransferase 34                           | N/A     | N/A                 | N/A                                                                                                             | N/A                                                                                  | N/A                                                                                                                                                                                                                    |
| Solyc04g025650.3 | monooxygenase 1                                   | MO1     | AT4G15760           | FAD binding; Monooxygenase activity                                                                             | N/A                                                                                  | Cheng, Chia-Yi, et al. "Araport11: a complete reannotation of the Arabidopsis thaliana reference genome." <i>The Plant Journal</i> 89.4 (2017): 789-804.                                                               |
| Solyc02g088090.1 | probable calcium-binding protein CML30            | CML30   | N/A                 | Calcium sensor                                                                                                  | Promoted calcium sensing                                                             | Boonburapong, Bongkoj, and Teerapong Buaboocha. "Genome-wide identification and analyses of the rice calmodulin and related potential calcium sensor proteins." <i>BMC plant biology</i> 7.1 (2007): 4.                |
| Solyc04g074440.1 | protein EXORDIUM-like                             | EXO     | AT4G08950           | Required for cell expansion in leaves; Mediate brassinosteroid-induced leaf and root growth/development         | Promoted cell expansion in the leaves; Promoted leaf and root growth/development     | Coll-Garcia, Danahe, et al. "EXORDIUM regulates brassinosteroid-responsive genes." <i>FEBS letters</i> 563.1-3 (2004): 82-86.                                                                                          |
| Solyc04g078750.3 | uncharacterized protein LOC101250111 isoform X1   | N/A     | N/A                 | N/A                                                                                                             | N/A                                                                                  | N/A                                                                                                                                                                                                                    |
| Solyc12g094520.2 | 4-coumarate--CoA ligase-like 5                    | 4CLL5   | AT1G20510           | Contributes to JA biosynthesis by initiating the beta-oxidative chain shortening of its precursors              | Increased production of phenylpropanoid-derived compounds; Increased JA biosynthesis | Koo, Abraham JK, et al. "Identification of a peroxisomal acyl-activating enzyme involved in the biosynthesis of jasmonic acid in Arabidopsis." <i>Journal of Biological Chemistry</i> 281.44 (2006): 33511-33520.      |
| Solyc02g071030.2 | chlorophyll a-b binding protein 1B, chloroplastic | LHCB1.3 | AT1G29930           | Light-harvesting complex functions as a light receptor; Captures and delivers excitation energy to photosystems | Promoted light capture and photosynthesis                                            | Yadav, Vandana, et al. "Light regulated modulation of Z-box containing promoters by photoreceptors and downstream regulatory components, COP1 and HYS, in Arabidopsis." <i>The Plant Journal</i> 31.6 (2002): 741-753. |
| Solyc02g082930.3 | acidic 27 kDa endochitinase precursor             | CHI17   | N/A                 | Involved in defense against chitin-containing fungal pathogens                                                  | Increased defense against fungal pathogens                                           | Danhash, Nadia, et al. "Molecular characterization of four chitinase cDNAs obtained from Cladosporium fulvum-infected tomato." <i>Plant molecular biology</i> 22.6 (1993): 1017-1029.                                  |
| Solyc03g082660.3 | molybdate-anion transporter                       | MFSD5   | N/A                 | Mediates high-affinity intracellular uptake of the rare oligo-element molybdenum                                | Increased intracellular uptake of molybdenum                                         | Tejada-Jiménez, Manuel, Aurora Galván, and Emilio Fernández. "Algae and humans share a molybdate transporter." <i>Proceedings of the National Academy of Sciences</i> 108.16 (2011): 6420-6425.                        |

| TomatoID         | NCBI Protein Name                                      | Gene ID   | <i>A. Thaliana</i> Homolog | Uniprot Description                                                                                                                                                                               | Putative Consequences for Infection                                                                                                                                                                 | Citation                                                                                                                                                                                                                                           |
|------------------|--------------------------------------------------------|-----------|----------------------------|---------------------------------------------------------------------------------------------------------------------------------------------------------------------------------------------------|-----------------------------------------------------------------------------------------------------------------------------------------------------------------------------------------------------|----------------------------------------------------------------------------------------------------------------------------------------------------------------------------------------------------------------------------------------------------|
| Solyc04g081530.1 | DNAJ-like protein                                      | T5J17.130 | AT4G39960                  | ATP binding, heat shock protein binding, metal ion binding, unfolding protein binding                                                                                                             | N/A                                                                                                                                                                                                 | Mayer, Klaus, et al. "Sequence and analysis of chromosome 4 of the plant <i>Arabidopsis thaliana</i> ." <i>Nature</i> 402.6763 (1999): 769-777.                                                                                                    |
| Solyc07g052510.4 | peroxidase 3 precursor                                 | PER3      | AT1G05260                  | Involved in removal of H <sub>2</sub> O <sub>2</sub> , oxidation of toxic reductants, biosynthesis and degradation of lignin, suberization, auxin catabolism, response to environmental stressors | Increased removal of H <sub>2</sub> O <sub>2</sub> , oxidation of toxic reductants, biosynthesis and degradation of lignin, suberization, auxin catabolism, and response to environmental stressors | Paynet, Florence, et al. "Temporal regulation of cell-wall pectin methylesterase and peroxidase isoforms in cadmium-treated flax hypocotyl." <i>Annals of botany</i> 104.7 (2009): 1363-1372.                                                      |
| Solyc07g064820.1 | mitogen-activated protein kinase kinase kinase 18-like | MAPKKK18  | AT1G05100                  | Act as ABA signal transducer under abiotic stress; Promotes stomatal growth/development; Inhibits germination and root growth; Promotes leaf senescence                                           | Increased response to stress; Increased reproductive development; Decreased growth/development; Increased leaf senescence                                                                           | Mitula, Filip, et al. "Arabidopsis ABA-activated kinase MAPKKK18 is regulated by protein phosphatase 2C ABI1 and the ubiquitin-proteasome pathway." <i>Plant and Cell Physiology</i> 56.12 (2015): 2351-2367.                                      |
| Solyc12g037930.2 | N/A                                                    | N/A       | N/A                        | N/A                                                                                                                                                                                               | N/A                                                                                                                                                                                                 | N/A                                                                                                                                                                                                                                                |
| Solyc03g116070.1 | mini zinc finger protein 3                             | MIF3      | AT1G18835                  | Involved in integrating signals from multiple hormones by regulating the expression of specific genes; Promotes the formation of ectopic shoot meristems                                          | Increased hormonal signaling; Promoted formation of ectopic shoot meristems                                                                                                                         | Hu, Wei, Baomin Feng, and Hong Ma. "Ectopic expression of the Arabidopsis MINI ZINC FINGER1 and MIF3 genes induces shoot meristems on leaf margins." <i>Plant molecular biology</i> 76.1-2 (2011): 57-68.                                          |
| Solyc04g071400.3 | WAT1-related protein At1g43650-like isoform X2         | AT1G43650 | AT1G43650                  | Transmembrane transporter activity                                                                                                                                                                | Increased transmembrane transporter                                                                                                                                                                 | Busov, Victor B., et al. "An auxin-inducible gene from loblolly pine ( <i>Pinus taeda</i> L.) is differentially expressed in mature and juvenile-phase shoots and encodes a putative transmembrane protein." <i>Planta</i> 218.6 (2004): 916-927.  |
| Solyc06g051620.3 | putative phospholipase C                               | plcD      | N/A                        | Hydrolase activity, acting on ester bonds                                                                                                                                                         | N/A                                                                                                                                                                                                 | Zheng, Huajun, et al. "Genetic basis of virulence attenuation revealed by comparative genomic analysis of <i>Mycobacterium tuberculosis</i> strain H37Ra versus H37Rv." <i>PLoS one</i> 3.6 (2008): e2375.                                         |
| Solyc06g083650.3 | GDSL esterase/lipase At5g33370                         | AT5G33370 | AT5G33370                  | Involved in cuticle development; Involved in lipid catabolism                                                                                                                                     | Increased cuticle development; Increased lipid catabolism                                                                                                                                           | Li-Beisson, Yonghua, et al. "Acyl-lipid metabolism." <i>The Arabidopsis book/American Society of Plant Biologists</i> 11 (2013).                                                                                                                   |
| Solyc09g065620.3 | chlorophyllase-2, chloroplastic isoform X4             | CLH2      | AT5G43860                  | Catalyzes the hydrolysis of ester bond in chlorophyll to yield chlorophyllide and phytol                                                                                                          | Increased chlorophyllide and phytol photosynthesis; Promoted photosynthesis                                                                                                                         | Tsuchiya, Tohru, et al. "Cloning of chlorophyllase, the key enzyme in chlorophyll degradation: finding of a lipase motif and the induction by methyl jasmonate." <i>Proceedings of the National Academy of Sciences</i> 96.26 (1999): 15362-15367. |
| Solyc12g014420.2 | glucan endo-1,3-beta-glucosidase 13-like               | AT5G56590 | AT5G56590                  | Involved in carbohydrate metabolic process, cell wall organization, and plant defense response                                                                                                    | Increased carbohydrate metabolism, cell wall organization, and plant defense response                                                                                                               | Wu, Qiong, et al. "Long-term balancing selection contributes to adaptation in <i>Arabidopsis</i> and its relatives." <i>Genome biology</i> 18.1 (2017): 1-15.                                                                                      |

| TomatoID         | NCBI Protein Name                                  | Gene ID   | <i>A. Thaliana</i> Homolog | Uniprot Description                                                                                                                                           | Putative Consequences for Infection                                                        | Citation                                                                                                                                                                                                                                            |
|------------------|----------------------------------------------------|-----------|----------------------------|---------------------------------------------------------------------------------------------------------------------------------------------------------------|--------------------------------------------------------------------------------------------|-----------------------------------------------------------------------------------------------------------------------------------------------------------------------------------------------------------------------------------------------------|
| Solyc03g118450.1 | uncharacterized protein LOC104646728               | N/A       | N/A                        | N/A                                                                                                                                                           | N/A                                                                                        | N/A                                                                                                                                                                                                                                                 |
| Solyc05g007490.3 | probable methyltransferase PMT2                    | AT1G26850 | AT1G26850                  | Involved in methylation                                                                                                                                       | N/A                                                                                        | Ascencio-Ibáñez, José Trinidad, et al. "Global analysis of Arabidopsis gene expression uncovers a complex array of changes impacting pathogen response and cell cycle during geminivirus infection." <i>Plant physiology</i> 148.1 (2008): 436-454. |
| Solyc09g083445.1 | N/A                                                | N/A       | N/A                        | N/A                                                                                                                                                           | N/A                                                                                        | N/A                                                                                                                                                                                                                                                 |
| Solyc11g010390.1 | classical arabinogalactan protein 10-like          | AGP10     | AT4G09030                  | Proteoglycan implicated in diverse developmental roles such as differentiation, cell-cell recognition, embryogenesis, and programmed cell death               | Promoted plant growth/development and cell differentiation; Promoted programmed cell death | Thieme, Christoph J., et al. "Endogenous Arabidopsis messenger RNAs transported to distant tissues." <i>Nature Plants</i> 1.4 (2015): 1-9.                                                                                                          |
| Solyc01g099370.3 | protein SRC2 homolog                               | SRC2      | AT1G09070                  | Acts as an activator of RBOHF, which mediates reactive oxygen species production; Plays a role in cold responses                                              | Increased response to reactive oxygen species; Promoted response to cold                   | Kawarazaki, Tomoko, et al. "A low temperature-inducible protein AtSRC2 enhances the ROS-producing activity of NADPH oxidase AtRbohF." <i>Biochimica et Biophysica Acta (BBA)-Molecular Cell Research</i> 1833.12 (2013): 2775-2780.                 |
| Solyc05g015840.3 | teosinte glume architecture 1                      | TGA1      | N/A                        | Acts as a transcriptional repressor of growth of lateral branches in length and numbers                                                                       | Repressed lateral branching and growth                                                     | Wang, Huai, et al. "Evidence that the origin of naked kernels during maize domestication was caused by a single amino acid substitution in tga1." <i>Genetics</i> 200.3 (2015): 965-974.                                                            |
| Solyc07g054220.1 | ethylene-responsive transcription factor ERF054    | ERF054    | AT4G28140                  | Binds to the GCC-box pathogenesis-related promoter element; Regulates gene expression under stress                                                            | Increased response to stress and pathogenesis                                              | Riechmann, José Luis, et al. "Arabidopsis transcription factors: genome-wide comparative analysis among eukaryotes." <i>Science</i> 290.5499 (2000): 2105-2110.                                                                                     |
| Solyc10g055780.1 | endochitinase 4                                    | N/A       | N/A                        | Involved in defense against chitin-containing fungal and bacterial pathogens                                                                                  | Increased defense against chitin-containing pathogens                                      | Herget, Thomas, Jeff Schell, and Peter H. Schreier. "Elicitor-specific induction of one member of the chitinase gene family in <i>Arachis hypogaea</i> ." <i>Molecular and General Genetics</i> MGG 224.3 (1990): 469-476.                          |
| Solyc11g039860.2 | N/A                                                | N/A       | N/A                        | N/A                                                                                                                                                           | N/A                                                                                        | N/A                                                                                                                                                                                                                                                 |
| Solyc01g079600.3 | phospholipase A1 PLIP2, chloroplastic isoform X1   | PLIP2     | AT1G02660                  | Catalyzes the initial step of oxylipins and jasmonate biosynthesis; Links ABA-mediated abiotic stress responses and oxylipin and jasmonate signaling pathways | Increased jasmonate biosynthesis; Increased jasmonate signaling crosstalk                  | Wang, Kun, et al. "Two abscisic acid-responsive plastid lipase genes involved in jasmonic acid biosynthesis in <i>Arabidopsis thaliana</i> ." <i>The Plant Cell</i> 30.5 (2018): 1006-1022.                                                         |
| Solyc04g051360.3 | ethylene-responsive transcription factor ABR1-like | ABR1      | AT5G64750                  | Negative regulator of the ABA signaling pathway involved in seed germination and in responses to stress                                                       | Increased ABA signaling; Increased response to stress and pathogenesis                     | Pandey, Girdhar K., et al. "ABR1, an APETALA2-domain transcription factor that functions as a repressor of ABA response in <i>Arabidopsis</i> ." <i>Plant Physiology</i> 139.3 (2005): 1185-1193.                                                   |

| TomatoID         | NCBI Protein Name                                       | Gene ID      | <i>A. Thaliana</i> Homolog | Uniprot Description                                                                                                                                | Putative Consequences for Infection                                             | Citation                                                                                                                                                                                                                                                                   |
|------------------|---------------------------------------------------------|--------------|----------------------------|----------------------------------------------------------------------------------------------------------------------------------------------------|---------------------------------------------------------------------------------|----------------------------------------------------------------------------------------------------------------------------------------------------------------------------------------------------------------------------------------------------------------------------|
| Solyc08g082820.3 | mediator of RNA polymerase II transcription subunit 37a | LOC107780639 | N/A                        | Plays a role in facilitating the assembly of multimeric protein complexes inside the ER                                                            | Increased assembly of multimeric protein complexes inside the ER                | N/A                                                                                                                                                                                                                                                                        |
| Solyc03g020040.3 | proteinase inhibitor type-2-like                        | N/A          | N/A                        | N/A                                                                                                                                                | N/A                                                                             | Balandin, Teresa, et al. "Structure and induction pattern of a novel proteinase inhibitor class II gene of tobacco." <i>Plant molecular biology</i> 27.6 (1995): 1197-1204.                                                                                                |
| Solyc04g076570.3 | protein CLT2, chloroplastic isoform X3                  | CLT2         | AT4G24460                  | Involved in thiol transport from the plastid to the cytosol; Transports glutathione and its precursor                                              | Increased thiol transport; Increased transport of glutathione and its presursor | Maughan, Spencer C., et al. "Plant homologs of the <i>Plasmodium falciparum</i> chloroquine-resistance transporter, PfCRT, are required for glutathione homeostasis and stress responses." <i>Proceedings of the National Academy of Sciences</i> 107.5 (2010): 2331-2336. |
| Solyc06g053640.1 | RING-H2 finger protein ATL16-like                       | ATL16        | AT5G43420                  | Involved in protein ubiquitination                                                                                                                 | Promoted protein ubiquitination                                                 | Thieme, Christoph J., et al. "Endogenous Arabidopsis messenger RNAs transported to distant tissues." <i>Nature Plants</i> 1.4 (2015): 1-9.                                                                                                                                 |
| Solyc06g069070.1 | non-specific lipid-transfer protein 2                   | LTP2         | AT2G38530                  | Plays a role in wax/cutin deposition in the cell walls of expanding epidermal cells and certain secretory tissues                                  | Promoted cell wall expansion                                                    | Peragine, Angela, et al. "SGS3 and SGS2/SDE1/RDR6 are required for juvenile development and the production of trans-acting siRNAs in Arabidopsis." <i>Genes &amp; development</i> 18.19 (2004): 2368-2379.                                                                 |
| Solyc09g031920.1 | uncharacterized protein LOC101268505                    | N/A          | N/A                        | N/A                                                                                                                                                | N/A                                                                             | N/A                                                                                                                                                                                                                                                                        |
| Solyc03g116590.3 | embryo-specific protein ATS3B                           | ATS3B        | AT5G62200                  | Plays a role during embryo development                                                                                                             | Promoted embryo development                                                     | Sato, Shusei, et al. "Structural analysis of Arabidopsis thaliana chromosome 5. X. Sequence features of the regions of 3,076,755 bp covered by sixty P1 and TAC clones." <i>DNA research</i> 7.1 (2000): 31-63.                                                            |
| Solyc05g005160.3 | ATP-citrate synthase alpha chain protein 2              | ACLA-2       | AT1G60810                  | ATP citrate-lyase is the primary enzyme responsible for the synthesis of cytosolic acetyl-CoA; Required for normal growth and development in seeds | Promoted seed development; Increased production of primary metabolites          | Fatland, Beth L., Basil J. Nikolau, and Eve Syrkin Wurtele. "Reverse genetic characterization of cytosolic acetyl-CoA generation by ATP-citrate lyase in Arabidopsis." <i>The Plant Cell</i> 17.1 (2005): 182-203.                                                         |
| Solyc10g008000.1 | protein LIGHT-DEPENDENT SHORT HYPOCOTYLS 10-like        | LSH10        | AT2G42610                  | Transcription regulator that acts as a developmental regulator by promoting cell growth in response to light                                       | Promoted cell growth in response to light                                       | Iyer, Lakshminarayan M., and L. Aravind. "ALOG domains: provenance of plant homeotic and developmental regulators from the DNA-binding domain of a novel class of DIRS1-type retroposons." <i>Biology direct</i> 7.1 (2012): 1-8.                                          |
| Solyc01g080600.3 | histone H3.2                                            | HTR2         | AT1G09200                  | Core component of the nucleosome; Plays central roles in transcription regulation, DNA repair/replication, and chromosomal stability               | Increased transcription regulation and DNA repair                               | Seki, Motoaki, et al. "Functional annotation of a full-length Arabidopsis cDNA collection." <i>Science</i> 296.5565 (2002): 141-145.                                                                                                                                       |
| Solyc02g069910.2 | N/A                                                     | N/A          | N/A                        | N/A                                                                                                                                                | N/A                                                                             | N/A                                                                                                                                                                                                                                                                        |

| TomatoID         | NCBI Protein Name                                      | Gene ID   | <i>A. Thaliana</i> Homolog | Uniprot Description                                                                                                                                                   | Putative Consequences for Infection                                     | Citation                                                                                                                                                                                                                                            |
|------------------|--------------------------------------------------------|-----------|----------------------------|-----------------------------------------------------------------------------------------------------------------------------------------------------------------------|-------------------------------------------------------------------------|-----------------------------------------------------------------------------------------------------------------------------------------------------------------------------------------------------------------------------------------------------|
| Solyc06g066600.3 | probable plastidic glucose transporter 3 isoform X2    | N/A       | N/A                        | N/A                                                                                                                                                                   | N/A                                                                     | N/A                                                                                                                                                                                                                                                 |
| Solyc07g007870.3 | 12-oxophytodienoate reductase 3                        | OPR3      | AT2G06050                  | Involved in the biosynthesis of JA and other oxylipin signaling molecules; Required for the spatial and temporal regulation of JA levels during dehiscence of anthers | Increased biosynthesis of JA and other oxylipin signaling molecules     | Sanders, Paul M., et al. "The Arabidopsis DELAYED DEHISCENCE1 gene encodes an enzyme in the jasmonic acid synthesis pathway." <i>The Plant Cell</i> 12.7 (2000): 1041-1061.                                                                         |
| Solyc08g083370.3 | soluble inorganic pyrophosphatase PPA1-like isoform X1 | PPA1      | AT1G01050                  | Controls the equilibrium of gluconeogenic reactions in the heterotrophic growth phase of early seedling establishment                                                 | Promoted equilibration gluconeogenic reactions                          | Navarro-De la Sancha, Ernesto, et al. "Characterization of two soluble inorganic pyrophosphatases from Arabidopsis thaliana." <i>Plant science</i> 172.4 (2007): 796-807.                                                                           |
| Solyc10g006660.3 | calcium-binding protein KRP1                           | KRP1      | AT4G27280                  | Potential calcium sensor                                                                                                                                              | Promoted calcium sensing; Promoted regulation of trichome morphogenesis | Reddy, Vaka S., et al. "KIC, a novel Ca <sup>2+</sup> binding protein with one EF-hand motif, interacts with a microtubule motor protein and regulates trichome morphogenesis." <i>The Plant Cell</i> 16.1 (2004): 185-200.                         |
| Solyc04g054950.3 | tropinone reductase homolog                            | AT1G07440 | AT1G07440                  | Oxidoreductase activity                                                                                                                                               | N/A                                                                     | Cheng, Chia-Yi, et al. "Araport11: a complete reannotation of the Arabidopsis thaliana reference genome." <i>The Plant Journal</i> 89.4 (2017): 789-804.                                                                                            |
| Solyc06g049020.1 | uncharacterized protein LOC101254906                   | N/A       | N/A                        | N/A                                                                                                                                                                   | N/A                                                                     | N/A                                                                                                                                                                                                                                                 |
| Solyc07g016215.1 | N/A                                                    | N/A       | N/A                        | N/A                                                                                                                                                                   | N/A                                                                     | N/A                                                                                                                                                                                                                                                 |
| Solyc08g075870.3 | probable methyltransferase PMT21                       | ERD3      | AT4G19120                  | Involved in methylation                                                                                                                                               | Increased methylation                                                   | Ascencio-Ibáñez, José Trinidad, et al. "Global analysis of Arabidopsis gene expression uncovers a complex array of changes impacting pathogen response and cell cycle during geminivirus infection." <i>Plant physiology</i> 148.1 (2008): 436-454. |
| Solyc12g040570.1 | 6-phosphogluconate dehydrogenase, decarboxylating 3    | PGD3      | AT5G41670                  | Essential component in cell redox homeostasis                                                                                                                         | Increased cell redox homeostasis                                        | Fernández-Fernández, Álvaro D., and Francisco J. Corpas. "In silico analysis of Arabidopsis thaliana peroxisomal 6-phosphogluconate dehydrogenase." <i>Scientifica</i> 2016 (2016).                                                                 |
| Solyc01g080910.2 | uncharacterized protein LOC101252815                   | N/A       | N/A                        | N/A                                                                                                                                                                   | N/A                                                                     | N/A                                                                                                                                                                                                                                                 |
| Solyc02g087770.3 | aldose 1-epimerase superfamily protein precursor       | N/A       | N/A                        | Mutarotase which converts alpha-aldose to the beta-anomer                                                                                                             | N/A                                                                     | Sriranganadane, Dev, et al. "Identification of novel secreted proteases during extracellular proteolysis by dermatophytes at acidic pH." <i>Proteomics</i> 11.22 (2011): 4422-4433.                                                                 |

| TomatoID         | NCBI Protein Name                             | Gene ID      | <i>A. Thaliana</i> Homolog | Uniprot Description                                                                                                                                                              | Putative Consequences for Infection                                                                       | Citation                                                                                                                                                                                                                                                                                 |
|------------------|-----------------------------------------------|--------------|----------------------------|----------------------------------------------------------------------------------------------------------------------------------------------------------------------------------|-----------------------------------------------------------------------------------------------------------|------------------------------------------------------------------------------------------------------------------------------------------------------------------------------------------------------------------------------------------------------------------------------------------|
| Solyc05g050560.1 | transcription factor bHLH13-like              | BHLH13       | AT1G01260                  | Involved in negative regulation of gene expression                                                                                                                               | N/A                                                                                                       | Borsics, Tamás, et al. "The cyclic nucleotide-gated calmodulin-binding channel AtCNGC10 localizes to the plasma membrane and influences numerous growth responses and starch accumulation in <i>Arabidopsis thaliana</i> ." <i>Planta</i> 225.3 (2007): 563-573.                         |
| Solyc07g017600.3 | pectinesterase/pectinesterase inhibitor PPE8B | N/A          | N/A                        | Plays roles in the deposition of pectin in developing tissues and in the wall loosening and cell separation that occurs in cell expansion, fruit ripening and abscission.        | Increased pectin deposition and plant cell wall loosening                                                 | Glover, H., et al. "Multiple pectin esterase genes are expressed in ripening peach fruit: nucleotide sequence of a cDNA encoding peach pectin esterase." <i>Plant Physiology</i> 112 (1996): 864-864.                                                                                    |
| Solyc09g008280.2 | S-adenosylmethionine synthase 3               | METK3        | AT2G36880                  | Catalyzes the formation of S-adenosylmethionine from methionine; Involved in SA-mediated defense; Involved in the biosynthesis of lignin                                         | Increased S-adenosylmethionine production; Promoted early defense response; Increased lignin biosynthesis | Goto, Derek B., et al. "A single-nucleotide mutation in a gene encoding S-adenosylmethionine synthetase is associated with methionine over-accumulation phenotype in <i>Arabidopsis thaliana</i> ." <i>Genes &amp; genetic systems</i> 77.2 (2002): 89-95.                               |
| Solyc09g089930.2 | ethylene responsive element binding protein   | EREBP1       | N/A                        | Involved in defense response; Involved in ethylene-activated signaling pathway                                                                                                   | Increased defense response; Increased ethylene-responsive signaling                                       | Horvath, Diana M., Dorothy J. Huang, and Nam-Hai Chua. "Four classes of salicylate-induced tobacco genes." <i>Molecular plant-microbe interactions</i> 11.9 (1998): 895-905.                                                                                                             |
| Solyc01g102390.3 | germin-like protein 5-1                       | OS05G0197200 | N/A                        | Plays a role in plant defense                                                                                                                                                    | Increased plant defense                                                                                   | Kawahara, Yoshihiro, et al. "Improvement of the <i>Oryza sativa</i> Nipponbare reference genome using next generation sequence and optical map data." <i>Rice</i> 6.1 (2013): 4.                                                                                                         |
| Solyc02g093230.3 | caffeoyl-CoA O-methyltransferase 1            | CCOAMT1      | At1g67980                  | Involved in the reinforcement of the plant cell wall; Involved in response to wounding or pathogen challenge by promoting the formation of cell wall-bound ferulic acid polymers | Increased production of feruloylated polysaccharides; Promoted plant cell wall development and integrity  | Meyermans, Hugo, et al. "Modifications in lignin and accumulation of phenolic glucosides in poplar xylem upon down-regulation of caffeoyl-coenzyme A O-methyltransferase, an enzyme involved in lignin biosynthesis." <i>Journal of Biological Chemistry</i> 275.47 (2000): 36899-36909. |
| Solyc07g008410.3 | protein DETOXIFICATION 29-like                | DTX29        | AT3G26590                  | Xenobiotic transmembrane transporter activity                                                                                                                                    | Increased detoxification                                                                                  | Hanada, Kousuke, et al. "Functional compensation of primary and secondary metabolites by duplicate genes in <i>Arabidopsis thaliana</i> ." <i>Molecular biology and evolution</i> 28.1 (2011): 377-382.                                                                                  |
| Solyc01g107390.3 | indole-3-acetic acid-amido synthetase GH3.2   | GH3.2        | AT4G37390                  | Catalyzes the synthesis of indole-3-acetic acid-amino acid conjugates, providing a mechanism for the plant to cope with the presence of excess auxin                             | Promoted auxin homeostasis                                                                                | Hilson, Pierre, et al. "Versatile gene-specific sequence tags for <i>Arabidopsis</i> functional genomics: transcript profiling and reverse genetics applications." <i>Genome research</i> 14.10b (2004): 2176-2189.                                                                      |
| Solyc02g082430.3 | MLO-like protein 8 isoform X2                 | MLO8         | AT2G17480                  | Involved in modulation of pathogen defense and leaf cell death                                                                                                                   | Promoted programmed cell death; Increased defense against pathogens                                       | Menges, Margit, et al. "Cell cycle-regulated gene expression in <i>Arabidopsis</i> ." <i>Journal of Biological Chemistry</i> 277.44 (2002): 41987-42002.                                                                                                                                 |
| Solyc03g112960.1 | pectinesterase 1                              | PME1         | AT1G53840                  | Acts in the modification of cell walls; Acts as negative regulator of genes involved in salt stress response                                                                     | Increased modification of plant cell walls; Impaired salt stress response                                 | Creighton, Maria T., et al. "Methylation of protein phosphatase 2A—Influence of regulators and environmental stress factors." <i>Plant, cell &amp; environment</i> 40.10 (2017): 2347-2358.                                                                                              |

| TomatoID         | NCBI Protein Name                                 | Gene ID | <i>A. Thaliana</i> Homolog | Uniprot Description                                                                                                                                                                       | Putative Consequences for Infection                                                                      | Citation                                                                                                                                                                                                                                                                                                                                                        |
|------------------|---------------------------------------------------|---------|----------------------------|-------------------------------------------------------------------------------------------------------------------------------------------------------------------------------------------|----------------------------------------------------------------------------------------------------------|-----------------------------------------------------------------------------------------------------------------------------------------------------------------------------------------------------------------------------------------------------------------------------------------------------------------------------------------------------------------|
| Solyc10g050160.2 | caffeoyl-CoA O-methyltransferase 5                | CCOAMT5 | N/A                        | Plays a role in the synthesis of feruloylated polysaccharides; Involved in the reinforcement of the plant cell wall; Involved in response to wounding or pathogen challenge               | Increased production of feruloylated polysaccharides; Promoted plant cell wall development and integrity | Meyermans, Hugo, et al. "Modifications in lignin and accumulation of phenolic glucosides in poplar xylem upon down-regulation of caffeoyl-coenzyme A O-methyltransferase, an enzyme involved in lignin biosynthesis." <i>Journal of Biological Chemistry</i> 275.47 (2000): 36899-36909.                                                                        |
| Solyc04g072000.3 | endochitinase EP3                                 | EP3     | AT3G54420                  | Involved in hypersensitive reaction against specific pathogens                                                                                                                            | Increased hypersensitive reaction against some pathogens                                                 | Liliane, B. de A., et al. "Arabidopsis thaliana class IV chitinase is early induced during the interaction with <i>Xanthomonas campestris</i> ." <i>Febs Letters</i> 419.1 (1997): 69-75.                                                                                                                                                                       |
| Solyc06g083050.3 | serine carboxypeptidase-like 20                   | SCPL20  | AT4G12910                  | Carboxypeptidase                                                                                                                                                                          | N/A                                                                                                      | N/A                                                                                                                                                                                                                                                                                                                                                             |
| Solyc07g007590.1 | arogenate dehydrogenase 2, chloroplastic-like     | TYRAAT2 | AT1G15710                  | Involved in the biosynthesis of tyrosine                                                                                                                                                  | Increased production of tyrosine biosynthesis                                                            | Rippert, Pascal, and Michel Matringe. "Purification and kinetic analysis of the two recombinant arogenate dehydrogenase isoforms of <i>Arabidopsis thaliana</i> ." <i>European Journal of Biochemistry</i> 269.19 (2002): 4753-4761.                                                                                                                            |
| Solyc11g010500.1 | mitochondrial uncoupling protein 5                | PUMP5   | AT2G22500                  | Mitochondrial transporters that create proton leaks across the inner mitochondrial membrane; Involved in protecting plant cells against oxidative stress damage                           | Increased defense against oxidative stress                                                               | Borecký, Jiří, et al. "The plant energy-dissipating mitochondrial systems: depicting the genomic structure and the expression profiles of the gene families of uncoupling protein and alternative oxidase in monocots and dicots." <i>Journal of Experimental Botany</i> 57.4 (2006): 849-864.                                                                  |
| Solyc12g036470.2 | transcription factor BEE 1-like                   | BEE1    | AT1G18400                  | Positive regulator of brassinosteroid signaling                                                                                                                                           | Promoted brassinosteroid signaling                                                                       | Friedrichsen, Danielle M., et al. "Three redundant brassinosteroid early response genes encode putative bHLH transcription factors required for normal growth." <i>Genetics</i> 162.3 (2002): 1445-1456.                                                                                                                                                        |
| Solyc02g082260.3 | 3-hydroxy-3-methylglutaryl-coenzyme A reductase 1 | HMG1    | AT1G76490                  | Catalyzes the synthesis of mevalonate, the specific precursor of all isoprenoid compounds present in plants                                                                               | Increased synthesis of isoprenoids                                                                       | Dale, Susan, et al. "Bacterial expression of the catalytic domain of 3-hydroxy-3-methylglutaryl-coa reductase (isoform HMGR1) from <i>Arabidopsis thaliana</i> , and its inactivation by phosphorylation at Ser577 by <i>Brassica oleracea</i> 3-hydroxy-3-methylglutaryl-CoA reductase kinase." <i>European Journal of Biochemistry</i> 233.2 (1995): 506-513. |
| Solyc01g102640.2 | nuclear pore complex protein NUP98A-like          | NUP98A  | AT1G10390                  | Structural constituent of nuclear pore; Necessary for mRNA transport from the nucleus and protein import into the nucleus; Required for photoperiodism; Required for constitutive defense | Impaired mRNA transport; Impaired photoperiodism; Impaired constitutive defense                          | "A putative nucleoporin 96 is required for both basal defense and constitutive resistance responses mediated by suppressor of npr1-1, constitutive 1."                                                                                                                                                                                                          |
| Solyc02g077770.3 | N/A                                               | N/A     | N/A                        | N/A                                                                                                                                                                                       | N/A                                                                                                      | N/A                                                                                                                                                                                                                                                                                                                                                             |

| TomatoID         | NCBI Protein Name                                           | Gene ID      | <i>A. Thaliana</i> Homolog | Uniprot Description                                                                                                             | Putative Consequences for Infection                                                                    | Citation                                                                                                                                                                                                                           |
|------------------|-------------------------------------------------------------|--------------|----------------------------|---------------------------------------------------------------------------------------------------------------------------------|--------------------------------------------------------------------------------------------------------|------------------------------------------------------------------------------------------------------------------------------------------------------------------------------------------------------------------------------------|
| Solyc10g018580.1 | hypothetical chloroplast RF1                                | ycf1a        | N/A                        | Kinase activity                                                                                                                 | N/A                                                                                                    | Lemieux, Claude, et al. "Chloroplast phylogenomic analysis of chlorophyte green algae identifies a novel lineage sister to the Sphaeropleales (Chlorophyceae)." <i>BMC Evolutionary Biology</i> 15.1 (2015): 264.                  |
| Solyc01g094210.2 | (+)-neomenthol dehydrogenase                                | SDR1         | AT3G61220                  | Involved in basal resistance against pathogens                                                                                  | Impaired basal resistance against pathogens                                                            | Choi, Hyong Woo, et al. "A role for a menthone reductase in resistance against microbial pathogens in plants." <i>Plant physiology</i> 148.1 (2008): 383-401.                                                                      |
| Solyc03g006880.3 | gibberellin 20-oxidase                                      | GA20OX1      | AT4G25420                  | Promotes transition from vegetative to floral state, plant fertility, and silique elongation                                    | Impaired plant reproduction                                                                            | Rieu, Ivo, et al. "The gibberellin biosynthetic genes AtGA20ox1 and AtGA20ox2 act, partially redundantly, to promote growth and development throughout the Arabidopsis life cycle." <i>The Plant Journal</i> 53.3 (2008): 488-504. |
| Solyc04g076010.3 | uncharacterized protein LOC101247909                        | N/A          | N/A                        | N/A                                                                                                                             | N/A                                                                                                    | N/A                                                                                                                                                                                                                                |
| Solyc08g066350.2 | histidine-containing phosphotransfer protein 4-like         | AHP4         | AT3G16360                  | Plays an important role in propagating cytokinin signal transduction through the multistep His-to-Asp phosphorelay              | Impaired stem and bud growth; Impaired response to auxin                                               | Hwang, Ildoo, Hwei-Chi Chen, and Jen Sheen. "Two-component signal transduction pathways in Arabidopsis." <i>Plant Physiology</i> 129.2 (2002): 500-515.                                                                            |
| Solyc11g012680.2 | pollen-specific leucine-rich repeat extensin-like protein 1 | PEX1         | AT3G19020                  | Modulates cell morphogenesis by regulating cell wall formation and assembly, and/or growth polarization                         | Impaired cell morphogenesis by regulating cell wall formation and assembly, and/or growth polarization | Mecchia, Martin A., et al. "RALF4/19 peptides interact with LRX proteins to control pollen tube growth in Arabidopsis." <i>Science</i> 358.6370 (2017): 1600-1603.                                                                 |
| Solyc03g097930.3 | potassium channel SKOR-like                                 | SKOR         | AT3G02850                  | Involved in potassium release into the xylem sap toward the shoots; Interacts with the cytoskeleton or with regulatory proteins | Impaired potassium transport                                                                           | Gaymard, Frédéric, et al. "Identification and disruption of a plant shaker-like outward channel involved in K <sup>+</sup> release into the xylem sap." <i>Cell</i> 94.5 (1998): 647-655.                                          |
| Solyc10g051020.2 | cytochrome P450 CYP72A219                                   | LOC104242999 | N/A                        | Heme binding; Iron ion binding; Monooxygenase activity                                                                          | N/A                                                                                                    | Sierro, Nicolas, et al. "Reference genomes and transcriptomes of <i>Nicotiana sylvestris</i> and <i>Nicotiana tomentosiformis</i> ." <i>Genome biology</i> 14.6 (2013): R60.                                                       |
| Solyc10g051030.2 | uncharacterized protein LOC101245596 isoform X3             | N/A          | N/A                        | N/A                                                                                                                             | N/A                                                                                                    | N/A                                                                                                                                                                                                                                |
| Solyc10g084070.1 | N/A                                                         | N/A          | N/A                        | N/A                                                                                                                             | N/A                                                                                                    | N/A                                                                                                                                                                                                                                |
| Solyc06g076490.3 | uncharacterized protein LOC101266832                        | N/A          | N/A                        | N/A                                                                                                                             | N/A                                                                                                    | N/A                                                                                                                                                                                                                                |
| Solyc11g010270.2 | homeobox-leucine zipper protein ATHB-6                      | ATHB-6       | AT2G22430                  | Acts as a growth regulator in response to water deficit; Involved in the negative regulation of the ABA signaling pathway       | Impaired response to drought; Impaired regulation of ABA signaling                                     | Himmelbach, Axel, et al. "Homeodomain protein ATHB6 is a target of the protein phosphatase AB1 and regulates hormone responses in Arabidopsis." <i>The EMBO journal</i> 21.12 (2002): 3029-3038.                                   |

| TomatoID         | NCBI Protein Name                                             | Gene ID | A. Thaliana Homolog | Uniprot Description                                                                                                                                  | Putative Consequences for Infection                                                    | Citation                                                                                                                                                                                                                 |
|------------------|---------------------------------------------------------------|---------|---------------------|------------------------------------------------------------------------------------------------------------------------------------------------------|----------------------------------------------------------------------------------------|--------------------------------------------------------------------------------------------------------------------------------------------------------------------------------------------------------------------------|
| Solyc12g096490.1 | protein GLUTAMINE DUMPER 5-like                               | GDU5    | AT5G24920           | Involved in the regulation of the amino acid metabolism                                                                                              | Impaired amino acid transport; Impaired regulation of amino acid metabolism            | Pratelli, Réjane, et al. "Stimulation of nonselective amino acid export by glutamine dumper proteins." <i>Plant Physiology</i> 152.2 (2010): 762-773.                                                                    |
| Solyc05g054850.1 | probable membrane-associated kinase regulator 3               | MAKR3   | AT2G37380           | Kinase inhibitor activity                                                                                                                            | N/A                                                                                    | Cheng, Chia-Yi, et al. "Araport11: a complete reannotation of the Arabidopsis thaliana reference genome." <i>The Plant Journal</i> 89.4 (2017): 789-804.                                                                 |
| Solyc06g008760.1 | glutaredoxin-C13                                              | GRXC13  | AT2G47880           | Involved in regulation of plant defense responses                                                                                                    | Decreased regulation of plant defense                                                  | Brodersen, Peter, et al. "Arabidopsis MAP kinase 4 regulates salicylic acid- and jasmonic acid/ethylene-dependent responses via EDS1 and PAD4." <i>The Plant Journal</i> 47.4 (2006): 532-546.                           |
| Solyc10g051120.2 | mitochondrial pyruvate carrier 1-like                         | MPC1    | AT5G20090           | Mediates the uptake of pyruvate into mitochondria                                                                                                    | Impaired drought response                                                              | Li, Chun-Long, et al. "NRGA1, a putative mitochondrial pyruvate carrier, mediates ABA regulation of guard cell ion channels and drought stress responses in Arabidopsis." <i>Molecular plant</i> 7.10 (2014): 1508-1521. |
| Solyc12g056950.2 | protein MARD1-like                                            | MARD1   | AT3G63210           | Facilitates the interaction of SnRK1 complex with effector proteins; Involved in seed dormancy control                                               | Impaired seed dormancy                                                                 | He, Yuehui, and Susheng Gan. "A novel zinc-finger protein with a proline-rich domain mediates ABA-regulated seed dormancy in Arabidopsis." <i>Plant molecular biology</i> 54.1 (2004): 1-9.                              |
| Solyc03g025350.3 | silicon efflux transporter LSI2-like                          | LSI2    | N/A                 | Silicon efflux transporter involved in silicon transport from the root cells to the apoplast                                                         | Impaired cell wall response to abiotic and biotic stressors                            | Ma, Jian Feng, et al. "An efflux transporter of silicon in rice." <i>Nature</i> 448.7150 (2007): 209-212.                                                                                                                |
| Solyc00g203660.2 | ribulose-1,5-bisphosphate carboxylase/oxygenase large subunit | rbcL    | ATCG00490           | RuBisCO catalyzes two reactions: Participates in the the carboxylation of D-ribulose 1,5-bisphosphate of RuBisCO                                     | Decreased RuBisCo catalysis                                                            | Chun, Louis, Alana Kawakami, and David A. Christopher. "Phytochrome A mediates blue light and UV-A-dependent chloroplast gene transcription in green leaves." <i>Plant Physiology</i> 125.4 (2001): 1957-1966.           |
| Solyc06g069060.1 | N/A                                                           | N/A     | N/A                 | N/A                                                                                                                                                  | N/A                                                                                    | N/A                                                                                                                                                                                                                      |
| Solyc08g068490.3 | indole-3-acetic acid-amido synthetase GH3.10-like             | GH3.10  | AT4G03400           | Catalyzes the synthesis of indole-3-acetic acid-amino acid conjugates, providing a mechanism for the plant to cope with the presence of excess auxin | Impaired auxin homeostasis                                                             | Takase, Tomoyuki, et al. "DFL2, a new member of the Arabidopsis GH3 gene family, is involved in red light-specific hypocotyl elongation." <i>Plant and Cell Physiology</i> 44.10 (2003): 1071-1080.                      |
| Solyc04g081460.2 | uncharacterized protein LOC101250258                          | N/A     | N/A                 | N/A                                                                                                                                                  | N/A                                                                                    | N/A                                                                                                                                                                                                                      |
| Solyc07g014620.1 | auxin-responsive protein SAUR50                               | SAUR50  | AT4G34760           | Effector of hormonal and environmental signals in plant growth                                                                                       | Impaired response to hormonal and environmental signaling; Impaired growth/development | Ren, Hong, and William M. Gray. "SAUR proteins as effectors of hormonal and environmental signals in plant growth." <i>Molecular plant</i> 8.8 (2015): 1153-1164.                                                        |

| TomatoID         | NCBI Protein Name                    | Gene ID      | <i>A. Thaliana</i> Homolog | Uniprot Description                                                                                                          | Putative Consequences for Infection                                                                                             | Citation                                                                                                                                                                                                                                                                                       |
|------------------|--------------------------------------|--------------|----------------------------|------------------------------------------------------------------------------------------------------------------------------|---------------------------------------------------------------------------------------------------------------------------------|------------------------------------------------------------------------------------------------------------------------------------------------------------------------------------------------------------------------------------------------------------------------------------------------|
| Solyc07g056280.3 | WRKY transcription factor 30         | WRKY30       | AT5G24110                  | Transcription factor involved in leaf senescence, response to hydrogen peroxide, response to ozone, and SA signaling pathway | Impaired leaf senescence; Impaired response to hydrogen peroxide; Impaired response to ozone; Impaired response to SA signaling | El-Esawi, Mohamed A., et al. "Overexpression of AtWRKY30 transcription factor enhances heat and drought stress tolerance in wheat ( <i>Triticum aestivum</i> L.)." <i>Genes</i> 10.2 (2019): 163.                                                                                              |
| Solyc09g082980.3 | uncharacterized protein LOC101261455 | N/A          | N/A                        | N/A                                                                                                                          | N/A                                                                                                                             | N/A                                                                                                                                                                                                                                                                                            |
| Solyc10g080670.2 | uncharacterized protein LOC101267365 | N/A          | N/A                        | N/A                                                                                                                          | N/A                                                                                                                             | N/A                                                                                                                                                                                                                                                                                            |
| Solyc02g084930.3 | abscisic acid 8'-hydroxylase 3-like  | CYP707A3     | AT5G45340                  | Involved in the oxidative degradation of ABA; Involved in the control of postgermination growth                              | Impaired degradation of ABA; Impaired postgermination growth                                                                    | Umezawa, Taishi, et al. "CYP707A3, a major ABA 8'-hydroxylase involved in dehydration and rehydration response in <i>Arabidopsis thaliana</i> ." <i>The Plant Journal</i> 46.2 (2006): 171-182.                                                                                                |
| Solyc12g036550.2 | Ycf1                                 | Ycf1         | N/A                        | Involved in protein precursor import into chloroplasts; Protein-conducting channel at the inner envelope                     | Decreased protein precursor import into chloroplasts                                                                            | Kikuchi, Shingo, et al. "Uncovering the protein translocon at the chloroplast inner envelope membrane." <i>Science</i> 339.6119 (2013): 571-574.                                                                                                                                               |
| Solyc04g007210.3 | zinc finger protein CONSTANS-LIKE 16 | COL16        | AT1G25440                  | Involved in regulation of transcription                                                                                      | N/A                                                                                                                             | Khanna, Rajnish, et al. "The <i>Arabidopsis</i> B-box zinc finger family." <i>The Plant Cell</i> 21.11 (2009): 3416-3420.                                                                                                                                                                      |
| Solyc04g082480.3 | protein NLP4 isoform X1              | LOC101512737 | N/A                        | N/A                                                                                                                          | N/A                                                                                                                             | Parween, Sabiha, et al. "An advanced draft genome assembly of a desi type chickpea ( <i>Cicer arietinum</i> L.)." <i>Scientific reports</i> 5 (2015): 12806.                                                                                                                                   |
| Solyc12g006630.2 | uncharacterized protein LOC101264095 | N/A          | N/A                        | N/A                                                                                                                          | N/A                                                                                                                             | N/A                                                                                                                                                                                                                                                                                            |
| Solyc06g074800.1 | zinc finger protein ZAT5-like        | ZAT5         | AT2G28200                  | Transcription factor involved in stress responses                                                                            | Impaired response to stressors                                                                                                  | Mittler, Ron, et al. "Gain-and loss-of-function mutations in <i>Zat10</i> enhance the tolerance of plants to abiotic stress." <i>FEBS letters</i> 580.28-29 (2006): 6537-6542.                                                                                                                 |
| Solyc11g069700.2 | elongation factor 1-alpha            | A1           | AT1G07940                  | Promotes the GTP-dependent binding of aminoacyl-tRNA to the A-site of ribosomes during protein biosynthesis                  | Impaired binding of aminoacyl-tRNA to the A-site of ribosomes during protein biosynthesis                                       | Lahmy, Sylvie, et al. "DOMINO1, a member of a small plant-specific gene family, encodes a protein essential for nuclear and nucleolar functions." <i>The Plant Journal</i> 39.6 (2004): 809-820.                                                                                               |
| Solyc00g013170.1 | N/A                                  | N/A          | N/A                        | N/A                                                                                                                          | N/A                                                                                                                             | N/A                                                                                                                                                                                                                                                                                            |
| Solyc01g100490.3 | nicotianamine synthase               | NAS1         | AT5G04950                  | Synthesizes nicotianamine, a sensor for the physiological iron status within the plant; Involved in the transport of iron    | Impaired iron transport                                                                                                         | Weber, Michael, et al. "Comparative microarray analysis of <i>Arabidopsis thaliana</i> and <i>Arabidopsis halleri</i> roots identifies nicotianamine synthase, a ZIP transporter and other genes as potential metal hyperaccumulation factors." <i>The Plant Journal</i> 37.2 (2004): 269-281. |
| Solyc05g010427.1 | N/A                                  | N/A          | N/A                        | N/A                                                                                                                          | N/A                                                                                                                             | N/A                                                                                                                                                                                                                                                                                            |

| TomatoID         | NCBI Protein Name                                                            | Gene ID      | A. Thaliana Homolog | Uniprot Description                                                                                                                                                                        | Putative Consequences for Infection                                                                                                  | Citation                                                                                                                                                                                                                        |
|------------------|------------------------------------------------------------------------------|--------------|---------------------|--------------------------------------------------------------------------------------------------------------------------------------------------------------------------------------------|--------------------------------------------------------------------------------------------------------------------------------------|---------------------------------------------------------------------------------------------------------------------------------------------------------------------------------------------------------------------------------|
| Solyc06g061240.3 | uncharacterized protein LOC101268004                                         | N/A          | N/A                 | N/A                                                                                                                                                                                        | N/A                                                                                                                                  | N/A                                                                                                                                                                                                                             |
| Solyc10g080910.1 | N/A                                                                          | N/A          | N/A                 | N/A                                                                                                                                                                                        | N/A                                                                                                                                  | N/A                                                                                                                                                                                                                             |
| Solyc08g005305.1 | N/A                                                                          | N/A          | N/A                 | N/A                                                                                                                                                                                        | N/A                                                                                                                                  | N/A                                                                                                                                                                                                                             |
| Solyc01g098130.2 | N/A                                                                          | N/A          | N/A                 | N/A                                                                                                                                                                                        | N/A                                                                                                                                  | N/A                                                                                                                                                                                                                             |
| Solyc06g060830.3 | homeobox-leucine zipper protein HAT4                                         | HAT4         | AT4G16780           | Involved in the negative regulation of cell elongation and specific cell proliferation processes; Mediator of the red/far-red light effects on leaf cell expansion in the shading response | Impaired regulation of cell elongation; Impaired regulation of lateral root formation and vascular system; Impaired shading response | Schena, Mark, Alan M. Lloyd, and Ronald W. Davis. "The HAT4 gene of Arabidopsis encodes a developmental regulator." <i>Genes &amp; development</i> 7.3 (1993): 367-379.                                                         |
| Solyc10g054820.2 | aquaporin-5 isoform X2                                                       | PIP2-5       | AT3G54820           | Water channel required to facilitate the transport of water across cell membrane                                                                                                           | Decreased water transport                                                                                                            | Marmagne, Anne, et al. "Identification of new intrinsic proteins in Arabidopsis plasma membrane proteome." <i>Molecular &amp; Cellular Proteomics</i> 3.7 (2004): 675-691.                                                      |
| Solyc07g014680.3 | Na+ transporter HKT1,1                                                       | HKT1         | AT4G10310           | Plays a central role in plant tolerance to salt; Involved in Na+ recirculation from shoots to roots by mediating Na+ loading into the phloem sap in shoots and unloading in roots          | Impaired salt tolerance                                                                                                              | Uozumi, Nobuyuki, et al. "The Arabidopsis HKT1 gene homolog mediates inward Na+ currents in <i>Xenopus laevis</i> oocytes and Na+ uptake in <i>Saccharomyces cerevisiae</i> ." <i>Plant physiology</i> 122.4 (2000): 1249-1260. |
| Solyc10g080920.2 | protein RADIALIS-like 1                                                      | RL1          | AT4G39250           | Transcription factor                                                                                                                                                                       | N/A                                                                                                                                  | Cheng, Chia-Yi, et al. "Araport11: a complete reannotation of the Arabidopsis thaliana reference genome." <i>The Plant Journal</i> 89.4 (2017): 789-804.                                                                        |
| Solyc03g119320.1 | uncharacterized protein LOC101259728                                         | N/A          | N/A                 | N/A                                                                                                                                                                                        | N/A                                                                                                                                  | N/A                                                                                                                                                                                                                             |
| Solyc07g066330.3 | NAC domain-containing protein 21/22 isoform X2                               | LOC107784013 | N/A                 | Involved in regulation of transcription                                                                                                                                                    | Impaired regulation of transcription                                                                                                 | Sierro, Nicolas, et al. "The tobacco genome sequence and its comparison with those of tomato and potato." <i>Nature communications</i> 5.1 (2014): 1-9.                                                                         |
| Solyc00g126000.1 | N/A                                                                          | N/A          | N/A                 | N/A                                                                                                                                                                                        | N/A                                                                                                                                  | N/A                                                                                                                                                                                                                             |
| Solyc03g070430.1 | N/A                                                                          | N/A          | N/A                 | N/A                                                                                                                                                                                        | N/A                                                                                                                                  | N/A                                                                                                                                                                                                                             |
| Solyc04g080040.3 | J domain-containing protein required for chloroplast accumulation response 1 | JAC1         | AT1G75100           | Required for chloroplast photorelocation movement                                                                                                                                          | Impaired photoperiodism                                                                                                              | Suetsugu, Noriyuki, Takatoshi Kagawa, and Masamitsu Wada. "An auxilin-like J-domain protein, JAC1, regulates phototropin-mediated chloroplast movement in Arabidopsis." <i>Plant Physiology</i> 139.1 (2005): 151-162.          |
| Solyc08g074893.1 | N/A                                                                          | N/A          | N/A                 | N/A                                                                                                                                                                                        | N/A                                                                                                                                  | N/A                                                                                                                                                                                                                             |

| TomatoID         | NCBI Protein Name                                          | Gene ID   | <i>A. Thaliana</i> Homolog | Uniprot Description                                                                                                                   | Putative Consequences for Infection                                                                                       | Citation                                                                                                                                                                                                                                                |
|------------------|------------------------------------------------------------|-----------|----------------------------|---------------------------------------------------------------------------------------------------------------------------------------|---------------------------------------------------------------------------------------------------------------------------|---------------------------------------------------------------------------------------------------------------------------------------------------------------------------------------------------------------------------------------------------------|
| Solyc09g090360.3 | phosphate transporter PHO1                                 | PHO1      | AT3G23430                  | Regulates Pi starvation responses; Involved in the transfer of Pi from roots to shoots; Involved in ABA induction of stomatal closure | Impaired Pi starvation response; Impaired transfer of Pi from roots to shoots; Impaired ABA induction of stomatal closure | Stefanovic, Aleksandra, et al. "Members of the PHO1 gene family show limited functional redundancy in phosphate transfer to the shoot, and are regulated by phosphate deficiency via distinct pathways." <i>The Plant Journal</i> 50.6 (2007): 982-994. |
| Solyc03g058390.2 | eukaryotic translation initiation factor 5B-like           | AT1G76720 | AT1G76720                  | GTPase activity; Translation initiation factor                                                                                        | N/A                                                                                                                       | Cheng, Chia-Yi, et al. "Araport11: a complete reannotation of the Arabidopsis thaliana reference genome." <i>The Plant Journal</i> 89.4 (2017): 789-804.                                                                                                |
| Solyc03g119910.3 | 3b-hydroxylase                                             | Le3OH-1   | N/A                        | N/A                                                                                                                                   | N/A                                                                                                                       | Yang, Y. Y., et al. "Cloning of two cDNAs encoding gibberellin 3beta-hydroxylase (Accession No. AB010991, AB010992) of tomato ( <i>Solanum lycopersicum</i> L.) seedlings (PGR98-200)." <i>Plant Physiol</i> 118.1534 (1998): 1534.                     |
| Solyc02g011830.1 | Ycf1                                                       | Ycf1      | N/A                        | Involved in protein precursor import into chloroplasts; Part of an intermediate translocation complex                                 | Decreased protein precursor import into chloroplasts                                                                      | Kikuchi, Shingo, et al. "Uncovering the protein translocon at the chloroplast inner envelope membrane." <i>Science</i> 339.6119 (2013): 571-574.                                                                                                        |
| Solyc08g081700.1 | N/A                                                        | N/A       | N/A                        | N/A                                                                                                                                   | N/A                                                                                                                       | N/A                                                                                                                                                                                                                                                     |
| Solyc00g126010.1 | N/A                                                        | N/A       | N/A                        | N/A                                                                                                                                   | N/A                                                                                                                       | N/A                                                                                                                                                                                                                                                     |
| Solyc10g005080.3 | protein LHY isoform X2                                     | LHY       | AT1G01060                  | Transcription factor involved in the circadian clock; Represses CCA1                                                                  | Impaired circadian rhythm; Impaired regulation of CCA1                                                                    | Mizoguchi, Tsuyoshi, et al. "LHY and CCA1 are partially redundant genes required to maintain circadian rhythms in Arabidopsis." <i>Developmental cell</i> 2.5 (2002): 629-641.                                                                          |
| Solyc11g021310.1 | Ycf1                                                       | Ycf1      | N/A                        | Involved in protein precursor import into chloroplasts; Translocation complex acting as a protein-conducting channel                  | Decreased protein precursor import into chloroplasts                                                                      | Kikuchi, Shingo, et al. "Uncovering the protein translocon at the chloroplast inner envelope membrane." <i>Science</i> 339.6119 (2013): 571-574.                                                                                                        |
| Solyc05g023730.1 | ribosomal protein L2                                       | N/A       | N/A                        | N/A                                                                                                                                   | N/A                                                                                                                       | N/A                                                                                                                                                                                                                                                     |
| Solyc08g075740.1 | N/A                                                        | N/A       | N/A                        | N/A                                                                                                                                   | N/A                                                                                                                       | N/A                                                                                                                                                                                                                                                     |
| Solyc05g049990.3 | heavy metal-associated isoprenylated plant protein 39-like | HIPP39    | AT1G01490                  | Heavy metal-binding protein involved in metal ion transport                                                                           | Impaired metal ion transport                                                                                              | Hanada, Kousuke, et al. "Functional compensation of primary and secondary metabolites by duplicate genes in Arabidopsis thaliana." <i>Molecular biology and evolution</i> 28.1 (2011): 377-382.                                                         |
| Solyc11g066510.2 | RING-H2 finger protein ATL57                               | ATL57     | AT2G27940                  | Involved in the pathway protein ubiquitination, which is part of protein modification                                                 | Impaired protein ubiquitination                                                                                           | Thieme, Christoph J., et al. "Endogenous Arabidopsis messenger RNAs transported to distant tissues." <i>Nature Plants</i> 1.4 (2015): 1-9.                                                                                                              |
| Solyc12g005750.1 | B-box domain protein 30                                    | MIP1A     | AT4G15248                  | Developmental regulator; Involved in the CO-mediated long-day flowering-promotion pathway                                             | Decreased sequestration of CO and CO-like proteins; Impaired flowering                                                    | Graeff, Moritz, et al. "MicroProtein-mediated recruitment of CONSTANS into a TOPLESS trimeric complex represses flowering in Arabidopsis." <i>PLoS genetics</i> 12.3 (2016): e1005959.                                                                  |

| TomatoID         | NCBI Protein Name                                          | Gene ID | <i>A. Thaliana</i> Homolog | Uniprot Description                                                                                                                                                     | Putative Consequences for Infection                                                        | Citation                                                                                                                                                                                                                               |
|------------------|------------------------------------------------------------|---------|----------------------------|-------------------------------------------------------------------------------------------------------------------------------------------------------------------------|--------------------------------------------------------------------------------------------|----------------------------------------------------------------------------------------------------------------------------------------------------------------------------------------------------------------------------------------|
| Solyc01g110360.3 | fructose-bisphosphate aldolase 1                           | FBA1    | AT2G21330                  | Plays a key role in glycolysis and gluconeogenesis                                                                                                                      | Impaired glycolysis and glucogenesis                                                       | Searle, Iain R., et al. "Long-distance signaling in nodulation directed by a CLAVATA1-like receptor kinase." <i>Science</i> 299.5603 (2003): 109-112.                                                                                  |
| Solyc04g058150.3 | metallothionein-like protein type 2 A                      | MT2A    | AT3G09390                  | Functions as metal chelator of copper and Zn; Plays a role in Cu homeostasis                                                                                            | Impaired Cu homeostasis; Impaired metal ion transport                                      | Guo, Woei-Jiun, Metha Meetam, and Peter B. Goldsbrough. "Examining the specific contributions of individual Arabidopsis metallothioneins to copper distribution and metal tolerance." <i>Plant physiology</i> 146.4 (2008): 1697-1706. |
| Solyc11g007860.1 | self-pruning interacting protein                           | N/A     | N/A                        | N/A                                                                                                                                                                     | N/A                                                                                        | N/A                                                                                                                                                                                                                                    |
| Solyc04g006950.3 | N/A                                                        | N/A     | N/A                        | N/A                                                                                                                                                                     | N/A                                                                                        | N/A                                                                                                                                                                                                                                    |
| Solyc08g075880.3 | heavy metal-associated isoprenylated plant protein 30-like | HIPP30  | AT2G18196                  | Involved in metal ion transport; Involved in response to drought stress                                                                                                 | Impaired metal ion transport; Impaired response to drought stress                          | "Stress induced and nuclear localized HIPP26 from Arabidopsis thaliana interacts via its heavy metal associated domain with the drought stress related zinc finger transcription factor ATHB29."                                       |
| Solyc07g005210.3 | temperature-induced lipocalin-1                            | TIL     | AT5G58070                  | Involved in basal and acquired thermotolerance; Lipocalin that confers protection against oxidative stress caused by heat, hypersalinity, freezing, paraquat, and light | Impaired thermotolerance; Impaired tolerance to salt stress, freezing, paraquat, and light | Abo-Ogiala, Atef, et al. "Temperature-induced lipocalin (TIL) is translocated under salt stress and protects chloroplasts from ion toxicity." <i>Journal of plant physiology</i> 171.3-4 (2014): 250-259.                              |
| Solyc11g006290.2 | 3-oxo-5-alpha-steroid 4-dehydrogenase 1                    | SRD5A1  | AT5G16010                  | Involved in phytohormone signaling                                                                                                                                      | Impaired phytohormone signaling                                                            | Thieme, Christoph J., et al. "Endogenous Arabidopsis messenger RNAs transported to distant tissues." <i>Nature Plants</i> 1.4 (2015): 1-9.                                                                                             |
| Solyc12g036793.1 | N/A                                                        | N/A     | N/A                        | N/A                                                                                                                                                                     | N/A                                                                                        | N/A                                                                                                                                                                                                                                    |
| Solyc12g096130.2 | N/A                                                        | N/A     | N/A                        | N/A                                                                                                                                                                     | N/A                                                                                        | N/A                                                                                                                                                                                                                                    |
| Solyc01g007810.1 | transcription repressor OFP15                              | OFP15   | AT2G36050                  | Transcriptional repressor that regulates multiple aspects of plant growth and development                                                                               | Promoted plant growth and development; Impaired regulation of plant growth and development | Wang, Shuai, et al. "Arabidopsis ovate family proteins, a novel transcriptional repressor family, control multiple aspects of plant growth and development." <i>PLoS One</i> 6.8 (2011): e23896.                                       |
| Solyc02g080510.1 | uncharacterized protein LOC101253959                       | N/A     | N/A                        | N/A                                                                                                                                                                     | N/A                                                                                        | N/A                                                                                                                                                                                                                                    |
| Solyc05g053850.3 | protein SELF PRUNING 5G                                    | SP      | N/A                        | N/A                                                                                                                                                                     | N/A                                                                                        | Thouet, Johanna, et al. "Revisiting the involvement of SELF-PRUNING in the sympodial growth of tomato." <i>Plant Physiology</i> 148.1 (2008): 61-64.                                                                                   |
| Solyc11g005290.1 | RING-H2 finger protein ATL78-like                          | ATL78   | AT2G27940                  | Involved in the pathway protein ubiquitination, which is part of protein modification                                                                                   | Impaired protein ubiquitination                                                            | Thieme, Christoph J., et al. "Endogenous Arabidopsis messenger RNAs transported to distant tissues." <i>Nature Plants</i> 1.4 (2015): 1-9.                                                                                             |
| Solyc01g112190.3 | protein NLP2                                               | NLP2    | AT4G35270                  | Transcription factor                                                                                                                                                    | N/A                                                                                        | Konishi, Mineko, and Shuichi Yanagisawa. "Arabidopsis NIN-like transcription factors have a central role in nitrate signalling." <i>Nature communications</i> 4.1 (2013): 1-9.                                                         |

| TomatoID         | NCBI Protein Name                                     | Gene ID      | <i>A. Thaliana</i> Homolog | Uniprot Description                                                                                                                                                  | Putative Consequences for Infection                                                    | Citation                                                                                                                                                                                                                                                                |
|------------------|-------------------------------------------------------|--------------|----------------------------|----------------------------------------------------------------------------------------------------------------------------------------------------------------------|----------------------------------------------------------------------------------------|-------------------------------------------------------------------------------------------------------------------------------------------------------------------------------------------------------------------------------------------------------------------------|
| Solyc07g006600.1 | protein GLUTAMINE DUMPER 2                            | GDU2         | AT4G25760                  | Subunit of an amino acid transporter involved in the regulation of the amino acid metabolism                                                                         | Impaired regulation of amino acid metabolism                                           | Pratelli, Réjane, et al. "Stimulation of nonselective amino acid export by glutamine dumper proteins." <i>Plant Physiology</i> 152.2 (2010): 762-773.                                                                                                                   |
| Solyc07g045530.2 | N/A                                                   | N/A          | N/A                        | N/A                                                                                                                                                                  | N/A                                                                                    | N/A                                                                                                                                                                                                                                                                     |
| Solyc10g079810.1 | N/A                                                   | N/A          | N/A                        | N/A                                                                                                                                                                  | N/A                                                                                    | N/A                                                                                                                                                                                                                                                                     |
| Solyc03g045070.1 | ammonium transporter 1 member 3                       | AMT1-3       | AT3G24300                  | Transporter involved in ammonium uptake from the soil; Contributes with AMT1-1 to the overall ammonium uptake capacity in roots under nitrogen-deficiency conditions | Impaired ammonium uptake and transport; Impaired response to nitrogen-deficiency       | Loqué, Dominique, et al. "Additive contribution of AMT1; 1 and AMT1; 3 to high-affinity ammonium uptake across the plasma membrane of nitrogen-deficient Arabidopsis roots." <i>The Plant Journal</i> 48.4 (2006): 522-534.                                             |
| Solyc03g065050.1 | ribosomal protein S12                                 | N/A          | N/A                        | N/A                                                                                                                                                                  | N/A                                                                                    | N/A                                                                                                                                                                                                                                                                     |
| Solyc05g007880.3 | cyclic dof factor 1 isoform X1                        | CDF1         | AT5G62430                  | Regulates a photoperiodic flowering response; Transcriptional repressor of 'CONSTANS' expression                                                                     | Impaired photoperiodic flowering response; Decreased repression of CONSTANS expression | Imaizumi, Takato, et al. "FKF1 F-box protein mediates cyclic degradation of a repressor of CONSTANS in Arabidopsis." <i>Science</i> 309.5732 (2005): 293-297.                                                                                                           |
| Solyc09g065390.1 | protein MARD1                                         | MARD1        | AT3G63210                  | Acts as an adapter to facilitate the interaction of SnRK1 complex with effector proteins; Involved in seed dormancy control                                          | Impaired seed dormancy                                                                 | He, Yuehui, and Susheng Gan. "A novel zinc-finger protein with a proline-rich domain mediates ABA-regulated seed dormancy in Arabidopsis." <i>Plant molecular biology</i> 54.1 (2004): 1-9.                                                                             |
| Solyc12g088670.2 | low-temperature-induced cysteine proteinase precursor | N/A          | N/A                        | Involved in cellular protein catabolic process                                                                                                                       | N/A                                                                                    | Spiegelman, Ziv, Amit Shahar, and Shmuel Wolf. "Down-regulation of SlCyp1 in the phloem reduces auxin response and photosynthetic rate in tomato ( <i>Solanum lycopersicum</i> ) plants." <i>Plant signaling &amp; behavior</i> 12.6 (2017): e1338224.                  |
| Solyc12g099200.2 | cell wall invertase inhibitor precursor               | LOC107808322 | N/A                        | Enzyme inhibitor activity                                                                                                                                            | Decreased enzyme inhibition                                                            | Hothorn, Michael, and Klaus Scheffzek. "Multiple crystal forms of the cell-wall invertase inhibitor from tobacco support high conformational rigidity over a broad pH range." <i>Acta Crystallographica Section D: Biological Crystallography</i> 62.6 (2006): 665-670. |
| Solyc11g008530.2 | endoribonuclease Dicer 2d isoform X1                  | AT3G03300    | AT3G03300                  | Plays an essential role in transitive silencing of transgenes by processing secondary siRNAs; Plays a role in antiviral RNA silencing                                | Impaired post-transcriptional gene silencing; Impaired defense against viral pathogens | "DICER-LIKE2 plays a primary role in transitive silencing of transgenes in Arabidopsis."                                                                                                                                                                                |
| Solyc12g036415.1 | N/A                                                   | N/A          | N/A                        | N/A                                                                                                                                                                  | N/A                                                                                    | N/A                                                                                                                                                                                                                                                                     |
| Solyc01g049685.1 | N/A                                                   | N/A          | N/A                        | N/A                                                                                                                                                                  | N/A                                                                                    | N/A                                                                                                                                                                                                                                                                     |
| Solyc01g049690.3 | transcription factor Pur-alpha 1 isoform X2           | PURA1        | AT2G32080                  | Transcription factor that specifically binds the purine-rich double-stranded telomeric repeated sequence                                                             | Impaired gene expression                                                               | Tremousaygue, Dominique, et al. "Plant interstitial telomere motifs participate in the control of gene expression in root meristems." <i>The Plant Journal</i> 20.5 (1999): 553-561.                                                                                    |

| TomatoID         | NCBI Protein Name                                                    | Gene ID | A. Thaliana Homolog | Uniprot Description                                                                                                                                    | Putative Consequences for Infection                                                    | Citation                                                                                                                                                                                                                                      |
|------------------|----------------------------------------------------------------------|---------|---------------------|--------------------------------------------------------------------------------------------------------------------------------------------------------|----------------------------------------------------------------------------------------|-----------------------------------------------------------------------------------------------------------------------------------------------------------------------------------------------------------------------------------------------|
| Solyc01g080870.3 | protein NRT1/ PTR FAMILY 7.3                                         | NPF7.3  | AT1G32450           | Low-affinity proton-dependent bidirectional nitrate transporter; Involved in nitrate loading into xylem                                                | Impaired nitrate transport                                                             | Lin, Shan-Hua, et al. "Mutation of the Arabidopsis NRT1. 5 nitrate transporter causes defective root-to-shoot nitrate transport." <i>The Plant Cell</i> 20.9 (2008): 2514-2528.                                                               |
| Solyc10g053880.1 | N/A                                                                  | N/A     | N/A                 | N/A                                                                                                                                                    | N/A                                                                                    | N/A                                                                                                                                                                                                                                           |
| Solyc04g011495.1 | N/A                                                                  | N/A     | N/A                 | N/A                                                                                                                                                    | N/A                                                                                    | N/A                                                                                                                                                                                                                                           |
| Solyc07g063420.3 | NAC domain transcription factor                                      | N/A     | N/A                 | N/A                                                                                                                                                    | N/A                                                                                    | N/A                                                                                                                                                                                                                                           |
| Solyc01g081060.3 | xyloglucan endotransglucosylase-hydrolase XTH5                       | XTH5    | AT5G13870           | Catalyzes xyloglucan endohydrolysis and endotransglycosylation; Essential constituent of the primary cell wall; Participates in cell wall construction | Impaired plant cell wall elongation; Impaired cell wall integrity                      | Hyodo, Hideki, et al. "Active gene expression of a xyloglucan endotransglucosylase/hydrolase gene, XTH9, in inflorescence apices is related to cell elongation in Arabidopsis thaliana." <i>Plant molecular biology</i> 52.2 (2003): 473-482. |
| Solyc11g021130.1 | ribosomal protein S7                                                 | N/A     | N/A                 | N/A                                                                                                                                                    | N/A                                                                                    | N/A                                                                                                                                                                                                                                           |
| Solyc01g110580.2 | auxin-responsive protein SAUR50                                      | SAUR50  | AT4G34760           | Effector of hormonal and environmental signals in plant growth                                                                                         | Impaired response to hormonal and environmental signaling; Impaired growth/development | Ren, Hong, and William M. Gray. "SAUR proteins as effectors of hormonal and environmental signals in plant growth." <i>Molecular plant</i> 8.8 (2015): 1153-1164.                                                                             |
| Solyc01g109800.2 | uncharacterized protein LOC104645424                                 | N/A     | N/A                 | N/A                                                                                                                                                    | N/A                                                                                    | N/A                                                                                                                                                                                                                                           |
| Solyc02g065220.3 | geraniol 8-hydroxylase-like                                          | CYP76B6 | N/A                 | Hydroxylase involved in the biosynthesis of hydroxygeraniol, a precursor of the terpenoid indole alkaloids                                             | Decreased biosynthesis of hydroxygeraniol                                              | Collu, Graziella, et al. "Activity of the cytochrome P450 enzyme geraniol 10-hydroxylase and alkaloid production in plant cell cultures." <i>Plant Science</i> 162.1 (2002): 165-172.                                                         |
| Solyc11g012690.2 | heavy metal-associated isoprenylated plant protein 7-like isoform X2 | HIPP07  | AT5G63530           | Heavy metal-binding protein involved in metal ion transport                                                                                            | Impaired metal ion transport                                                           | Dykema, Philip E., et al. "A new class of proteins capable of binding transition metals." <i>Plant molecular biology</i> 41.1 (1999): 139-150.                                                                                                |
| Solyc04g051470.1 | uncharacterized protein LOC101261064                                 | N/A     | N/A                 | N/A                                                                                                                                                    | N/A                                                                                    | N/A                                                                                                                                                                                                                                           |
| Solyc08g079430.3 | copper amine oxidase precursor                                       | N/A     | N/A                 | N/A                                                                                                                                                    | N/A                                                                                    | N/A                                                                                                                                                                                                                                           |
| Solyc04g071780.3 | cytochrome P450 71A1                                                 | CYP71A1 | N/A                 | Involved in the metabolism of compounds associated with the development of flavor in the ripening fruit process                                        | Impaired fruit ripening                                                                | O'Keefe, Daniel P., and Kenneth J. Leto. "Cytochrome P-450 from the mesocarp of avocado ( <i>Persea americana</i> )." <i>Plant physiology</i> 89.4 (1989): 1141-1149.                                                                         |

| TomatoID         | NCBI Protein Name                                             | Gene ID   | <i>A. Thaliana</i> Homolog | Uniprot Description                                                                                                          | Putative Consequences for Infection                                                    | Citation                                                                                                                                                                                                    |
|------------------|---------------------------------------------------------------|-----------|----------------------------|------------------------------------------------------------------------------------------------------------------------------|----------------------------------------------------------------------------------------|-------------------------------------------------------------------------------------------------------------------------------------------------------------------------------------------------------------|
| Solyc01g080460.3 | pyruvate, phosphate dikinase, chloroplastic                   | PPDK      | N/A                        | Formation of phosphoenolpyruvate, which is the primary acceptor of CO <sub>2</sub> in C <sub>4</sub> and Crassulacean plants | Impaired primary metabolism                                                            | Rosche, Elke, and Peter Westhoff. "Primary structure of pyruvate, orthophosphate dikinase in the dicotyledonous C <sub>4</sub> plant <i>Flaveria trinervia</i> ." FEBS letters 273.1-2 (1990): 116-121.     |
| Solyc07g065410.1 | uncharacterized protein LOC101261249                          | N/A       | N/A                        | N/A                                                                                                                          | N/A                                                                                    | N/A                                                                                                                                                                                                         |
| Solyc12g087870.2 | purine permease 3-like                                        | PUP3      | AT1G28220                  | Involved in transport of purine derivatives during pollen germination and tube elongation                                    | Impaired transport of purine derivatives during pollen germination and tube elongation | Bürkle, Lukas, et al. "Transport of cytokinins mediated by purine transporters of the PUP family expressed in phloem, hydathodes, and pollen of <i>Arabidopsis</i> ." The Plant Journal 34.1 (2003): 13-26. |
| Solyc05g012030.1 | protein BIG GRAIN 1-like E                                    | AT1G69160 | AT1G69160                  | Involved in auxin transport; Regulator of the auxin signaling pathway                                                        | Impaired auxin transport; Impaired regulation of auxin signaling                       | Culligan, Kevin M., et al. "ATR and ATM play both distinct and additive roles in response to ionizing radiation." The Plant Journal 48.6 (2006): 947-961.                                                   |
| Solyc01g104910.3 | uncharacterized protein LOC101246968                          | N/A       | N/A                        | N/A                                                                                                                          | N/A                                                                                    | N/A                                                                                                                                                                                                         |
| Solyc01g107460.2 | uncharacterized protein LOC101248432                          | N/A       | N/A                        | N/A                                                                                                                          | N/A                                                                                    | N/A                                                                                                                                                                                                         |
| Solyc04g011670.3 | TGACG-sequence-specific DNA-binding protein TGA-1A isoform X2 | TGA1A     | N/A                        | Promotes auxin- and SA-inducible transcription                                                                               | Impaired auxin- and SA-inducible transcription                                         | Pascuzzi, Pete, et al. "Auxin-induced stress potentiates trans-activation by a conserved plant basic/leucine-zipper factor." Journal of Biological Chemistry 273.41 (1998): 26631-26637.                    |
| Solyc05g013530.3 | uncharacterized protein LOC101267605 isoform X1               | N/A       | N/A                        | N/A                                                                                                                          | N/A                                                                                    | N/A                                                                                                                                                                                                         |
| Solyc05g041360.2 | maturase K                                                    | matK      | ATCG00040                  | Assists in splicing its own and other chloroplast group II introns                                                           | Impaired chloroplastic gene splicing                                                   | Sato, Shusei, et al. "Complete structure of the chloroplast genome of <i>Arabidopsis thaliana</i> ." DNA research 6.5 (1999): 283-290.                                                                      |
| Solyc08g074490.3 | uncharacterized protein At4g15970                             | AT4G15970 | AT4G15970                  | N/A                                                                                                                          | N/A                                                                                    | N/A                                                                                                                                                                                                         |
| Solyc09g061390.1 | maturase K                                                    | matK      | ATCG00040                  | Assists in splicing its own and other chloroplast group II introns                                                           | Impaired chloroplastic gene splicing                                                   | Sato, Shusei, et al. "Complete structure of the chloroplast genome of <i>Arabidopsis thaliana</i> ." DNA research 6.5 (1999): 283-290.                                                                      |
| Solyc11g073120.2 | transcription factor MYB48                                    | MYB48     | AT3G46130                  | Transcriptional regulator                                                                                                    | N/A                                                                                    | Riechmann, José Luis, et al. "Arabidopsis transcription factors: genome-wide comparative analysis among eukaryotes." Science 290.5499 (2000): 2105-2110.                                                    |
| Solyc10g078570.1 | uncharacterized protein LOC101265504                          | N/A       | N/A                        | N/A                                                                                                                          | N/A                                                                                    | N/A                                                                                                                                                                                                         |

| TomatoID         | NCBI Protein Name                               | Gene ID | <i>A. Thaliana</i> Homolog | Uniprot Description                                                                                                      | Putative Consequences for Infection                    | Citation                                                                                                                                                                                       |
|------------------|-------------------------------------------------|---------|----------------------------|--------------------------------------------------------------------------------------------------------------------------|--------------------------------------------------------|------------------------------------------------------------------------------------------------------------------------------------------------------------------------------------------------|
| Solyc01g066260.2 | N/A                                             | N/A     | N/A                        | N/A                                                                                                                      | N/A                                                    | N/A                                                                                                                                                                                            |
| Solyc06g005330.3 | transcription factor MYB48-like                 | MYB48   | AT3G46130                  | Transcriptional regulator                                                                                                | N/A                                                    | Riechmann, José Luis, et al. "Arabidopsis transcription factors: genome-wide comparative analysis among eukaryotes." <i>Science</i> 290.5499 (2000): 2105-2110.                                |
| Solyc08g075570.3 | urea-proton symporter DUR3                      | DUR3    | AT5G45380                  | High-affinity urea-proton symporter involved in the active transport of urea across the plasma membrane into root cells  | Impaired urea uptake and transport                     | Liu, Lai-Hua, et al. "AtDUR3 encodes a new type of high-affinity urea/H <sup>+</sup> symporter in Arabidopsis." <i>The Plant Cell</i> 15.3 (2003): 790-800.                                    |
| Solyc05g047440.1 | Ycf1                                            | Ycf1    | N/A                        | Part of an intermediate translocation complex acting as a protein-conducting channel at the inner chloroplastic envelope | Decreased protein precursor import into chloroplasts   | Kikuchi, Shingo, et al. "Uncovering the protein translocon at the chloroplast inner envelope membrane." <i>Science</i> 339.6119 (2013): 571-574.                                               |
| Solyc03g115920.3 | probable E3 ubiquitin-protein ligase RNF217     | RNF217  | N/A                        | E3 ubiquitin-protein ligase which accepts ubiquitin from E2 ubiquitin-conjugating enzymes in the form of a thioester     | Impaired primary metabolism                            | Ohmura-Hoshino, Mari, et al. "A novel family of membrane-bound E3 ubiquitin ligases." <i>Journal of biochemistry</i> 140.2 (2006): 147-154.                                                    |
| Solyc06g068500.3 | chaperone protein dnaJ8, chloroplastic-like     | ATJ8    | AT1G80920                  | Plays a continuous role in plant development and the structural organization of compartments                             | Impaired plant development and structural organization | Nanjo, Tokihiko, et al. "Toxicity of free proline revealed in an Arabidopsis T-DNA-tagged mutant deficient in proline dehydrogenase." <i>Plant and Cell Physiology</i> 44.5 (2003): 541-548.   |
| Solyc01g014250.2 | N/A                                             | N/A     | N/A                        | N/A                                                                                                                      | N/A                                                    | N/A                                                                                                                                                                                            |
| Solyc05g054750.3 | uncharacterized protein LOC101266225 isoform X1 | N/A     | N/A                        | N/A                                                                                                                      | N/A                                                    | N/A                                                                                                                                                                                            |
| Solyc08g068850.3 | uncharacterized protein LOC101268894 isoform 1  | N/A     | N/A                        | N/A                                                                                                                      | N/A                                                    | N/A                                                                                                                                                                                            |
| Solyc11g069450.1 | uncharacterized protein LOC101259309            | N/A     | N/A                        | N/A                                                                                                                      | N/A                                                    | N/A                                                                                                                                                                                            |
| Solyc11g032190.1 | N/A                                             | N/A     | N/A                        | N/A                                                                                                                      | N/A                                                    | N/A                                                                                                                                                                                            |
| Solyc12g008380.1 | uncharacterized protein LOC101257239            | N/A     | N/A                        | N/A                                                                                                                      | N/A                                                    | N/A                                                                                                                                                                                            |
| Solyc10g047090.2 | ribosomal protein L2                            | N/A     | N/A                        | N/A                                                                                                                      | N/A                                                    | N/A                                                                                                                                                                                            |
| Solyc11g069940.1 | glutaredoxin-C6                                 | GRXC6   | AT4G33040                  | Involved in regulation of plant defense responses                                                                        | Impaired regulation of plant defense                   | Brodersen, Peter, et al. "Arabidopsis MAP kinase 4 regulates salicylic acid- and jasmonic acid/ethylene-dependent responses via EDS1 and PAD4." <i>The Plant Journal</i> 47.4 (2006): 532-546. |

| TomatoID         | NCBI Protein Name                                    | Gene ID      | <i>A. Thaliana</i> Homolog | Uniprot Description                                                                                                  | Putative Consequences for Infection                          | Citation                                                                                                                                                                                                          |
|------------------|------------------------------------------------------|--------------|----------------------------|----------------------------------------------------------------------------------------------------------------------|--------------------------------------------------------------|-------------------------------------------------------------------------------------------------------------------------------------------------------------------------------------------------------------------|
| Solyc05g005870.3 | nodulin-related MtN21 family protein                 | UMAMIT16-psi | AT4G24980                  | Transmembrane transporter activity                                                                                   | N/A                                                          | Cheng, Chia-Yi, et al. "Araport11: a complete reannotation of the Arabidopsis thaliana reference genome." <i>The Plant Journal</i> 89.4 (2017): 789-804.                                                          |
| Solyc10g047390.1 | Ycf1                                                 | Ycf1         | N/A                        | Involved in protein precursor import into chloroplasts; Translocation complex acting as a protein-conducting channel | Decreased protein precursor import into chloroplasts         | Kikuchi, Shingo, et al. "Uncovering the protein translocon at the chloroplast inner envelope membrane." <i>Science</i> 339.6119 (2013): 571-574.                                                                  |
| Solyc09g008200.3 | heavy metal-associated isoprenylated plant protein 5 | HIPP05       | AT2G36950                  | Heavy-metal-binding protein involved in metal ion transport; Involved in disease resistance                          | Impaired metal ion transport; Impaired disease resistance    | Cooper, Bret, et al. "A network of rice genes associated with stress response and seed development." <i>Proceedings of the National Academy of Sciences</i> 100.8 (2003): 4945-4950.                              |
| Solyc11g021240.2 | hypothetical chloroplast RF1                         | ycf1a        | N/A                        | Kinase activity                                                                                                      | N/A                                                          | Lemieux, Claude, et al. "Chloroplast phylogenomic analysis of chlorophyte green algae identifies a novel lineage sister to the Sphaeropleales (Chlorophyceae)." <i>BMC Evolutionary Biology</i> 15.1 (2015): 264. |
| Solyc05g026460.1 | N/A                                                  | N/A          | N/A                        | N/A                                                                                                                  | N/A                                                          | N/A                                                                                                                                                                                                               |
| Solyc06g005320.1 | transcription factor MYB48-like                      | MYB48        | AT3G46130                  | Transcriptional regulator                                                                                            | N/A                                                          | Riechmann, José Luis, et al. "Arabidopsis transcription factors: genome-wide comparative analysis among eukaryotes." <i>Science</i> 290.5499 (2000): 2105-2110.                                                   |
| Solyc06g066530.1 | uncharacterized protein LOC101252498                 | N/A          | N/A                        | N/A                                                                                                                  | N/A                                                          | N/A                                                                                                                                                                                                               |
| Solyc11g056500.2 | uncharacterized protein LOC104644731                 | N/A          | N/A                        | N/A                                                                                                                  | N/A                                                          | N/A                                                                                                                                                                                                               |
| Solyc12g035550.1 | Ycf1                                                 | Ycf1         | N/A                        | Involved in protein precursor import into chloroplasts; Protein-conducting channel at the inner envelope             | Decreased protein precursor import into chloroplasts         | Kikuchi, Shingo, et al. "Uncovering the protein translocon at the chloroplast inner envelope membrane." <i>Science</i> 339.6119 (2013): 571-574.                                                                  |
| Solyc08g079230.1 | 14 kDa proline-rich protein DC2.15-like              | N/A          | N/A                        | Involved with the initiation of embryogenesis or with the metabolic changes produced by the removal of auxins        | Impaired embryogenesis; Impaired response to auxin signaling | Aleith, F., and G. Richter. "Gene expression during induction of somatic embryogenesis in carrot cell suspensions." <i>Planta</i> 183.1 (1991): 17-24.                                                            |
| Solyc09g009130.3 | putative phyto-sulfokine peptide precursor           | N/A          | N/A                        | N/A                                                                                                                  | N/A                                                          | N/A                                                                                                                                                                                                               |
| Solyc08g016000.1 | Ycf1                                                 | Ycf1         | N/A                        | Involved in protein precursor import into chloroplasts; Translocation complex acting as a protein-conducting channel | Decreased protein precursor import into chloroplasts         | Kikuchi, Shingo, et al. "Uncovering the protein translocon at the chloroplast inner envelope membrane." <i>Science</i> 339.6119 (2013): 571-574.                                                                  |

| TomatoID         | NCBI Protein Name                         | Gene ID | <i>A. Thaliana</i> Homolog | Uniprot Description                                                                                                                                                                                       | Putative Consequences for Infection                                                                       | Citation                                                                                                                                                                                                                                                                          |
|------------------|-------------------------------------------|---------|----------------------------|-----------------------------------------------------------------------------------------------------------------------------------------------------------------------------------------------------------|-----------------------------------------------------------------------------------------------------------|-----------------------------------------------------------------------------------------------------------------------------------------------------------------------------------------------------------------------------------------------------------------------------------|
| Solyc07g006310.1 | transcription factor IBH1-like 1          | IBL1    | AT4G30410                  | Acts as transcriptional repressor that negatively regulates cell and organ elongation in response to gibberellin and brassinosteroid signaling                                                            | Impaired regulation of cell and organ elongation in response to gibberellin and brassinosteroid signaling | Zhiponova, Miroslava K., et al. "Helix-loop-helix/basic helix-loop-helix transcription factor network represses cell elongation in Arabidopsis through an apparent incoherent feed-forward loop." <i>Proceedings of the National Academy of Sciences</i> 111.7 (2014): 2824-2829. |
| Solyc09g010530.3 | cation/H(+) antiporter 20                 | CHX20   | AT3G53720                  | Operates as a K <sup>+</sup> /H <sup>+</sup> antiporter that maintains K <sup>+</sup> homeostasis in guard cells; Helps regulate pH; Plays a critical role in osmoregulation through via stomatal opening | Impaired K <sup>+</sup> homeostasis and pH homeostasis; Impaired osmoregulation                           | Padmanaban, Senthilkumar, et al. "Participation of endomembrane cation/H <sup>+</sup> exchanger AtCHX20 in osmoregulation of guard cells." <i>Plant Physiology</i> 144.1 (2007): 82-93.                                                                                           |
| Solyc11g021300.1 | Ycf1                                      | Ycf1    | N/A                        | Involved in protein precursor import into chloroplasts; Translocation complex acting as a protein-conducting channel                                                                                      | Decreased protein precursor import into chloroplasts                                                      | Kikuchi, Shingo, et al. "Uncovering the protein translocon at the chloroplast inner envelope membrane." <i>Science</i> 339.6119 (2013): 571-574.                                                                                                                                  |
| Solyc11g021260.1 | Ycf1                                      | Ycf1    | N/A                        | Involved in protein precursor import into chloroplasts; Translocation complex acting as a protein-conducting channel                                                                                      | Decreased protein precursor import into chloroplasts                                                      | Kikuchi, Shingo, et al. "Uncovering the protein translocon at the chloroplast inner envelope membrane." <i>Science</i> 339.6119 (2013): 571-574.                                                                                                                                  |
| Solyc06g005310.3 | transcription factor MYB48-like           | MYB48   | AT3G46130                  | Transcriptional regulator                                                                                                                                                                                 | N/A                                                                                                       | Riechmann, José Luis, et al. "Arabidopsis transcription factors: genome-wide comparative analysis among eukaryotes." <i>Science</i> 290.5499 (2000): 2105-2110.                                                                                                                   |
| Solyc01g086660.2 | N/A                                       | N/A     | N/A                        | N/A                                                                                                                                                                                                       | N/A                                                                                                       | N/A                                                                                                                                                                                                                                                                               |
| Solyc11g021290.2 | Ycf1                                      | Ycf1    | N/A                        | Involved in protein precursor import into chloroplasts; Translocation complex acting as a protein-conducting channel                                                                                      | Decreased protein precursor import into chloroplasts                                                      | Kikuchi, Shingo, et al. "Uncovering the protein translocon at the chloroplast inner envelope membrane." <i>Science</i> 339.6119 (2013): 571-574.                                                                                                                                  |
| Solyc08g065610.3 | vacuolar processing enzyme VPE3 precursor | VPE3    | N/A                        | Proteolysis involved in cellular protein catabolic process                                                                                                                                                | N/A                                                                                                       | Radchuk, Volodymyr, et al. "Development of maternal seed tissue in barley is mediated by regulated cell expansion and cell disintegration and coordinated with endosperm growth." <i>Journal of experimental botany</i> 62.3 (2011): 1217-1227.                                   |
| Solyc10g049470.1 | Ycf1                                      | Ycf1    | N/A                        | Involved in protein precursor import into chloroplasts; Translocation complex acting as a protein-conducting channel                                                                                      | Decreased protein precursor import into chloroplasts                                                      | Kikuchi, Shingo, et al. "Uncovering the protein translocon at the chloroplast inner envelope membrane." <i>Science</i> 339.6119 (2013): 571-574.                                                                                                                                  |
| Solyc01g109090.2 | N/A                                       | N/A     | N/A                        | N/A                                                                                                                                                                                                       | N/A                                                                                                       | N/A                                                                                                                                                                                                                                                                               |
| Solyc11g021280.1 | Ycf1                                      | Ycf1    | N/A                        | Involved in protein precursor import into chloroplasts; Translocation complex acting as a protein-conducting channel                                                                                      | Decreased protein precursor import into chloroplasts                                                      | Kikuchi, Shingo, et al. "Uncovering the protein translocon at the chloroplast inner envelope membrane." <i>Science</i> 339.6119 (2013): 571-574.                                                                                                                                  |

| TomatoID         | NCBI Protein Name                | Gene ID | <i>A. Thaliana</i> Homolog | Uniprot Description                                                                                                                                                 | Putative Consequences for Infection                                                            | Citation                                                                                                                                                                                                                          |
|------------------|----------------------------------|---------|----------------------------|---------------------------------------------------------------------------------------------------------------------------------------------------------------------|------------------------------------------------------------------------------------------------|-----------------------------------------------------------------------------------------------------------------------------------------------------------------------------------------------------------------------------------|
| Solyc11g021270.1 | Ycf1                             | Ycf1    | N/A                        | Involved in protein precursor import into chloroplasts; Translocation complex acting as a protein-conducting channel                                                | Decreased protein precursor import into chloroplasts                                           | Kikuchi, Shingo, et al. "Uncovering the protein translocon at the chloroplast inner envelope membrane." <i>Science</i> 339.6119 (2013): 571-574.                                                                                  |
| Solyc04g054745.1 | N/A                              | N/A     | N/A                        | N/A                                                                                                                                                                 | N/A                                                                                            | N/A                                                                                                                                                                                                                               |
| Solyc09g065790.1 | clp protease proteolytic subunit | CLPR2   | AT1G12410                  | Required for chloroplast development and integrity; Involved in the regulation of plastoglobules formation                                                          | Impaired chloroplast development and integrity; Impaired regulation of plastoglobule formation | Rudella, Andrea, et al. "Downregulation of ClpR2 leads to reduced accumulation of the ClpPRS protease complex and defects in chloroplast biogenesis in Arabidopsis." <i>The Plant Cell</i> 18.7 (2006): 1704-1721.                |
| Solyc09g064580.2 | photosystem II protein M         | psbM    | N/A                        | Component of the core complex of photosystem II; Light-driven water:plastoquinone oxidoreductase that uses light energy to abstract electrons from H <sub>2</sub> O | Impaired light capture and photosynthesis                                                      | Kawakami, Keisuke, et al. "Location of chloride and its possible functions in oxygen-evolving photosystem II revealed by X-ray crystallography." <i>Proceedings of the National Academy of Sciences</i> 106.21 (2009): 8567-8572. |
| Solyc01g017220.1 | ATP synthase CF1 epsilon subunit | atpE    | ATCG00470                  | Produces ATP from ADP in the presence of a proton gradient across the membrane                                                                                      | Impaired ATP production                                                                        | Goulas, Estelle, et al. "The chloroplast lumen and stromal proteomes of Arabidopsis thaliana show differential sensitivity to short-and long-term exposure to low temperature." <i>The Plant Journal</i> 47.5 (2006): 720-734.    |
| Solyc04g039850.1 | ATP synthase beta subunit        | atpB    | ATCG00480                  | Produces ATP from ADP in the presence of a proton gradient across the membrane                                                                                      | Impaired ATP production                                                                        | Goulas, Estelle, et al. "The chloroplast lumen and stromal proteomes of Arabidopsis thaliana show differential sensitivity to short-and long-term exposure to low temperature." <i>The Plant Journal</i> 47.5 (2006): 720-734.    |
| Solyc06g007515.1 | N/A                              | N/A     | N/A                        | N/A                                                                                                                                                                 | N/A                                                                                            | N/A                                                                                                                                                                                                                               |
