# Supplementary material for: Effects of ‘Candidatus Liberibacter solanacearum’ haplotypes A and B on tomato gene expression and geotropism
Source: PubMed Central journal article supplement (PMC8966271; doi:10.1186/s12870-022-03505-z), 2022-03-30
Supplement: 12870_2022_3505_MOESM4_ESM.pdf [file 12870_2022_3505_MOESM4_ESM.pdf]

| Source | Term Name                                                     | Term ID    | Adjusted p-value | Term Size | Query Size | Intersection Size | Effective Domain Size |
|--------|---------------------------------------------------------------|------------|------------------|-----------|------------|-------------------|-----------------------|
| GO:MF  | caffeoyl-CoA O-methyltransferase activity                     | GO:0042409 | <0.01            | 4         | 239        | 3                 | 21188                 |
| GO:MF  | transcription regulatory region sequence-specific DNA binding | GO:0000976 | <0.01            | 960       | 239        | 27                | 21188                 |
| GO:MF  | regulatory region nucleic acid binding                        | GO:0001067 | <0.01            | 960       | 239        | 27                | 21188                 |
| GO:MF  | sequence-specific double-stranded DNA binding                 | GO:1990837 | <0.01            | 986       | 239        | 27                | 21188                 |
| GO:MF  | oxidoreductase activity                                       | GO:0016491 | 0.01             | 1685      | 239        | 38                | 21188                 |
| GO:MF  | DNA-binding transcription factor activity                     | GO:0003700 | 0.02             | 1644      | 239        | 37                | 21188                 |
| GO:MF  | metal ion binding                                             | GO:0046872 | 0.03             | 3708      | 239        | 66                | 21188                 |
| GO:MF  | cation binding                                                | GO:0043169 | 0.03             | 3724      | 239        | 66                | 21188                 |
| GO:MF  | double-stranded DNA binding                                   | GO:0003690 | 0.05             | 1095      | 239        | 27                | 21188                 |
| GO:BP  | response to stimulus                                          | GO:0050896 | <0.01            | 6807      | 242        | 136               | 23416                 |
| GO:BP  | response to chemical                                          | GO:0042221 | <0.01            | 3407      | 242        | 90                | 23416                 |
| GO:BP  | response to stress                                            | GO:0006950 | <0.01            | 3969      | 242        | 91                | 23416                 |
| GO:BP  | response to oxygen-containing compound                        | GO:1901700 | <0.01            | 1812      | 242        | 55                | 23416                 |
| GO:BP  | response to endogenous stimulus                               | GO:0009719 | <0.01            | 1877      | 242        | 55                | 23416                 |
| GO:BP  | response to organic substance                                 | GO:0010033 | <0.01            | 2313      | 242        | 62                | 23416                 |
| GO:BP  | response to hormone                                           | GO:0009725 | <0.01            | 1839      | 242        | 54                | 23416                 |
| GO:BP  | response to abiotic stimulus                                  | GO:0009628 | <0.01            | 2372      | 242        | 62                | 23416                 |
| GO:BP  | response to inorganic substance                               | GO:0010035 | <0.01            | 1015      | 242        | 38                | 23416                 |
| GO:BP  | cellular response to chemical stimulus                        | GO:0070887 | <0.01            | 1793      | 242        | 46                | 23416                 |
| GO:BP  | response to wounding                                          | GO:0009611 | <0.01            | 204       | 242        | 14                | 23416                 |
| GO:BP  | response to water                                             | GO:0009415 | <0.01            | 406       | 242        | 19                | 23416                 |
| GO:BP  | hormone-mediated signaling pathway                            | GO:0009755 | <0.01            | 981       | 242        | 30                | 23416                 |
| GO:BP  | cellular response to endogenous stimulus                      | GO:0071495 | <0.01            | 1101      | 242        | 32                | 23416                 |
| GO:BP  | metabolic process                                             | GO:0008152 | <0.01            | 13480     | 242        | 178               | 23416                 |
| GO:BP  | response to acid chemical                                     | GO:0001101 | <0.01            | 437       | 242        | 19                | 23416                 |
| GO:BP  | defense response                                              | GO:0006952 | <0.01            | 1603      | 242        | 40                | 23416                 |
| GO:BP  | response to water deprivation                                 | GO:0009414 | <0.01            | 397       | 242        | 18                | 23416                 |
| GO:BP  | cellular response to hormone stimulus                         | GO:0032870 | <0.01            | 1062      | 242        | 31                | 23416                 |
| GO:BP  | cellular process                                              | GO:0009987 | <0.01            | 16066     | 242        | 201               | 23416                 |
| GO:BP  | response to jasmonic acid                                     | GO:0009753 | <0.01            | 247       | 242        | 14                | 23416                 |
| GO:BP  | oxoacid metabolic process                                     | GO:0043436 | <0.01            | 1290      | 242        | 34                | 23416                 |
| GO:BP  | organic acid metabolic process                                | GO:0006082 | <0.01            | 1299      | 242        | 34                | 23416                 |
| GO:BP  | lignin biosynthetic process                                   | GO:0009809 | <0.01            | 51        | 242        | 7                 | 23416                 |
| GO:BP  | cellular response to organic substance                        | GO:0071310 | <0.01            | 1270      | 242        | 33                | 23416                 |
| GO:BP  | response to osmotic stress                                    | GO:0006970 | <0.01            | 701       | 242        | 23                | 23416                 |
| GO:BP  | response to ethylene                                          | GO:0009723 | <0.01            | 323       | 242        | 15                | 23416                 |
| GO:BP  | response to chitin                                            | GO:0010200 | <0.01            | 139       | 242        | 10                | 23416                 |
| GO:BP  | carboxylic acid metabolic process                             | GO:0019752 | <0.01            | 1123      | 242        | 30                | 23416                 |
| GO:BP  | oxidation-reduction process                                   | GO:0055114 | <0.01            | 1860      | 242        | 41                | 23416                 |
| GO:BP  | response to cadmium ion                                       | GO:0046686 | <0.01            | 348       | 242        | 15                | 23416                 |
| GO:BP  | regulation of jasmonic acid mediated signaling pathway        | GO:2000022 | <0.01            | 41        | 242        | 6                 | 23416                 |
| GO:BP  | small molecule metabolic process                              | GO:0044281 | <0.01            | 1897      | 242        | 41                | 23416                 |
| GO:BP  | regulation of response to stimulus                            | GO:0048583 | <0.01            | 770       | 242        | 23                | 23416                 |
| GO:BP  | response to biotic stimulus                                   | GO:0009607 | <0.01            | 1439      | 242        | 34                | 23416                 |
| GO:BP  | organic substance metabolic process                           | GO:0071704 | 0.01             | 11945     | 242        | 157               | 23416                 |

| Source | Term Name                                             | Term ID    | Adjusted p-value | Term Size | Query Size | Intersection Size | Effective Domain Size |
|--------|-------------------------------------------------------|------------|------------------|-----------|------------|-------------------|-----------------------|
| GO:BP  | response to external stimulus                         | GO:0009605 | 0.01             | 1873      | 242        | 40                | 23416                 |
| GO:BP  | phenylpropanoid biosynthetic process                  | GO:0009699 | 0.01             | 101       | 242        | 8                 | 23416                 |
| GO:BP  | defense response to insect                            | GO:0002213 | 0.01             | 29        | 242        | 5                 | 23416                 |
| GO:BP  | response to external biotic stimulus                  | GO:0043207 | 0.01             | 1426      | 242        | 33                | 23416                 |
| GO:BP  | response to other organism                            | GO:0051707 | 0.01             | 1426      | 242        | 33                | 23416                 |
| GO:BP  | lignin metabolic process                              | GO:0009808 | 0.01             | 75        | 242        | 7                 | 23416                 |
| GO:BP  | biological regulation                                 | GO:0065007 | 0.01             | 7043      | 242        | 104               | 23416                 |
| GO:BP  | response to metal ion                                 | GO:0010038 | 0.01             | 492       | 242        | 17                | 23416                 |
| GO:BP  | organic substance biosynthetic process                | GO:1901576 | 0.01             | 5682      | 242        | 88                | 23416                 |
| GO:BP  | regulation of signal transduction                     | GO:0009966 | 0.01             | 347       | 242        | 14                | 23416                 |
| GO:BP  | secondary metabolic process                           | GO:0019748 | 0.02             | 398       | 242        | 15                | 23416                 |
| GO:BP  | phenylpropanoid metabolic process                     | GO:0009698 | 0.02             | 144       | 242        | 9                 | 23416                 |
| GO:BP  | regulation of signaling                               | GO:0023051 | 0.02             | 352       | 242        | 14                | 23416                 |
| GO:BP  | ion transport                                         | GO:0006811 | 0.02             | 1075      | 242        | 27                | 23416                 |
| GO:BP  | regulation of cell communication                      | GO:0010646 | 0.02             | 356       | 242        | 14                | 23416                 |
| GO:BP  | biosynthetic process                                  | GO:0009058 | 0.02             | 5820      | 242        | 89                | 23416                 |
| GO:BP  | interspecies interaction between organisms            | GO:0044419 | 0.02             | 1475      | 242        | 33                | 23416                 |
| GO:BP  | carboxylic acid biosynthetic process                  | GO:0046394 | 0.03             | 580       | 242        | 18                | 23416                 |
| GO:BP  | organic acid biosynthetic process                     | GO:0016053 | 0.03             | 580       | 242        | 18                | 23416                 |
| GO:BP  | cellular response to stimulus                         | GO:0051716 | 0.04             | 3511      | 242        | 60                | 23416                 |
| GO:BP  | response to lipid                                     | GO:0033993 | 0.04             | 881       | 242        | 23                | 23416                 |
| GO:CC  | cell periphery                                        | GO:0071944 | <0.01            | 4222      | 232        | 76                | 21213                 |
| GO:CC  | external encapsulating structure                      | GO:0030312 | <0.01            | 809       | 232        | 25                | 21213                 |
| GO:CC  | cell wall                                             | GO:0005618 | <0.01            | 807       | 232        | 24                | 21213                 |
| GO:CC  | extracellular region                                  | GO:0005576 | 0.01             | 2008      | 232        | 41                | 21213                 |
| KEGG   | Biosynthesis of secondary metabolites                 | KEGG:01110 | <0.01            | 1230      | 72         | 38                | 4976                  |
| KEGG   | Stilbenoid, diarylheptanoid and gingerol biosynthesis | KEGG:00945 | <0.01            | 9         | 72         | 4                 | 4976                  |
| KEGG   | Metabolic pathways                                    | KEGG:01100 | <0.01            | 2266      | 72         | 49                | 4976                  |
| KEGG   | Phenylpropanoid biosynthesis                          | KEGG:00940 | 0.01             | 177       | 72         | 10                | 4976                  |
| KEGG   | Flavonoid biosynthesis                                | KEGG:00941 | 0.01             | 24        | 72         | 4                 | 4976                  |
