# Supplementary material for: Effects of ‘Candidatus Liberibacter solanacearum’ haplotypes A and B on tomato gene expression and geotropism
Source: PubMed Central journal article supplement (PMC8966271; doi:10.1186/s12870-022-03505-z), 2022-03-30
Supplement: 12870_2022_3505_MOESM5_ESM.pdf [file 12870_2022_3505_MOESM5_ESM.pdf]

| TomatoID                | DE in Infected | NCBI Protein Name                                   | Gene ID      | Uniprot Description                                                                                                                         | Putative Consequences for Infection                                                                        | Citation                                                                                                                                                                                                                                        |
|-------------------------|----------------|-----------------------------------------------------|--------------|---------------------------------------------------------------------------------------------------------------------------------------------|------------------------------------------------------------------------------------------------------------|-------------------------------------------------------------------------------------------------------------------------------------------------------------------------------------------------------------------------------------------------|
| <i>Solyc12g010030.2</i> | 8.64           | leucine aminopeptidase 2, chloroplastic isoform X1  | LAP2         | Involved in the processing and regular turnover of intracellular proteins; Heat shock protein                                               | <i>Increased turnover of intracellular proteins; Increased protection from heat-induced damaged</i>        | Waditee-Sirisattha, Rungaroon, et al. "The Arabidopsis aminopeptidase LAP2 regulates plant growth, leaf longevity and stress response." <i>New Phytologist</i> 191.4 (2011): 958-969.                                                           |
| <i>Solyc09g084470.3</i> | 8.38           | wound-induced proteinase inhibitor 1 precursor      | N/A          | Inhibits both chymotrypsin and trypsin, suppressing protein digestion by herbivores                                                         | <i>Increased defense against herbivory</i>                                                                 | Cleveland, Thomas E., Robert W. Thornburg, and Clarence A. Ryan. "Molecular characterization of a wound-inducible inhibitor I gene from potato and the processing of its mRNA and protein." <i>Plant molecular biology</i> 8.3 (1987): 199-207. |
| <i>Solyc09g084480.3</i> | 8.38           | wound-induced proteinase inhibitor 1-like           | N/A          | Inhibits both chymotrypsin and trypsin, suppressing protein digestion by herbivores                                                         | <i>Increased defense against herbivory</i>                                                                 | Cleveland, Thomas E., Robert W. Thornburg, and Clarence A. Ryan. "Molecular characterization of a wound-inducible inhibitor I gene from potato and the processing of its mRNA and protein." <i>Plant molecular biology</i> 8.3 (1987): 199-207. |
| <i>Solyc09g084490.3</i> | 8.38           | wound-induced proteinase inhibitor 1-like           | N/A          | Inhibits both chymotrypsin and trypsin, suppressing protein digestion by herbivores                                                         | <i>Increased defense against herbivory</i>                                                                 | Cleveland, Thomas E., Robert W. Thornburg, and Clarence A. Ryan. "Molecular characterization of a wound-inducible inhibitor I gene from potato and the processing of its mRNA and protein." <i>Plant molecular biology</i> 8.3 (1987): 199-207. |
| <i>Solyc01g095140.3</i> | 7.90           | ethylene-responsive late embryogenesis-like protein | ER5          | Involved in response to desiccation                                                                                                         | <i>Increased response to drought</i>                                                                       | Zegzouti, Hicham, et al. "ER5, a tomato cDNA encoding an ethylene-responsive LEA-like protein: characterization and expression in response to drought, ABA and wounding." <i>Plant molecular biology</i> 35.6 (1997): 847-854.                  |
| <i>Solyc09g089540.3</i> | 7.71           | wound-induced proteinase inhibitor 1-like           | N/A          | Inhibits both chymotrypsin and trypsin, suppressing protein digestion by herbivores                                                         | <i>Increased defense against herbivory</i>                                                                 | Cleveland, Thomas E., Robert W. Thornburg, and Clarence A. Ryan. "Molecular characterization of a wound-inducible inhibitor I gene from potato and the processing of its mRNA and protein." <i>Plant molecular biology</i> 8.3 (1987): 199-207. |
| <i>Solyc03g098780.2</i> | 7.43           | aspartic protease inhibitor 1                       | N/A          | Inhibitor of cathepsin D; Protects the plant by inhibiting proteases of invading organisms                                                  | <i>Increased defense against herbivory</i>                                                                 | Ishikawa, Atsushi, et al. "A family of potato genes that encode Kunitz-type proteinase inhibitors: structural comparisons and differential expression." <i>Plant and cell physiology</i> 35.2 (1994): 303-312.                                  |
| <i>Solyc09g083440.3</i> | 7.35           | wound-induced proteinase inhibitor 1                | N/A          | Inhibits both chymotrypsin and trypsin, suppressing protein digestion by herbivores                                                         | <i>Increased defense against herbivory</i>                                                                 | Cleveland, Thomas E., Robert W. Thornburg, and Clarence A. Ryan. "Molecular characterization of a wound-inducible inhibitor I gene from potato and the processing of its mRNA and protein." <i>Plant molecular biology</i> 8.3 (1987): 199-207. |
| <i>Solyc09g089520.3</i> | 6.60           | proteinase inhibitor I-B-like                       | LOC107794480 | Involved in response to wounding                                                                                                            | <i>Promoted response to wounding</i>                                                                       | Sierro, Nicolas, et al. "The tobacco genome sequence and its comparison with those of tomato and potato." <i>Nature communications</i> 5.1 (2014): 1-9.                                                                                         |
| <i>Solyc09g089510.3</i> | 6.29           | proteinase inhibitor I-B                            | LOC107794480 | Involved in response to wounding                                                                                                            | <i>Promoted response to wounding</i>                                                                       | Sierro, Nicolas, et al. "The tobacco genome sequence and its comparison with those of tomato and potato." <i>Nature communications</i> 5.1 (2014): 1-9.                                                                                         |
| <i>Solyc01g091170.3</i> | 6.10           | Arginase 2, chloroplastic/mitochondrial             | ARGAH2       | Utilized in the urea cycle; Precursor for the synthesis of both polyamines and proline; Catalyzes the formation of putrescine from agmatine | <i>Promoted jasmonate-related functions; Increased urea waste management; Increased freezing tolerance</i> | Dombrecht, Bruno, et al. "MYC2 differentially modulates diverse jasmonate-dependent functions in Arabidopsis." <i>The Plant Cell</i> 19.7 (2007): 2225-2245.                                                                                    |

| TomatoID                | DE in Infected | NCBI Protein Name                                      | Gene ID   | Uniprot Description                                                                                                                                                                                                                                                                                      | Putative Consequences for Infection                                                                                                                                                                                           | Citation                                                                                                                                                                                                                                                 |
|-------------------------|----------------|--------------------------------------------------------|-----------|----------------------------------------------------------------------------------------------------------------------------------------------------------------------------------------------------------------------------------------------------------------------------------------------------------|-------------------------------------------------------------------------------------------------------------------------------------------------------------------------------------------------------------------------------|----------------------------------------------------------------------------------------------------------------------------------------------------------------------------------------------------------------------------------------------------------|
| <i>Solyc11g071480.1</i> | 5.55           | agmatine hydroxycinnamoyltransferase 1-like            | AHT1      | Promotes the synthesis of hydroxycinnamic acid amides, which play a role in defense against pathogens                                                                                                                                                                                                    | <i>Increased defense against pathogens</i>                                                                                                                                                                                    | Chen, Wei, et al. "Genome-wide association analyses provide genetic and biochemical insights into natural variation in rice metabolism." <i>Nature genetics</i> 46.7 (2014): 714-721.                                                                    |
| <i>Solyc12g009220.2</i> | 4.88           | jasmonate ZIM-domain protein 2                         | NTJAZ2    | Involved in regulation of defense response; Involved in regulation of JA-mediated signaling pathway; Involved in response to wounding                                                                                                                                                                    | <i>Increased regulation of defense response; Increased regulation of JA-mediated signaling; Increased response to wounding</i>                                                                                                | Shoji, Tsubasa, Takayuki Ogawa, and Takashi Hashimoto. "Jasmonate-induced nicotine formation in tobacco is mediated by tobacco COI1 and JAZ genes." <i>Plant and cell physiology</i> 49.7 (2008): 1003-1012.                                             |
| <i>Solyc06g076020.3</i> | 4.79           | heat shock cognate 70 kDa protein 1                    | HSP70-1   | Facilitates folding of de novo proteins, assists translocation of precursor proteins into organelles; Degrades damaged protein under stress conditions; Involved in defense response; Involved in protein transport to chloroplasts; Modulates stomatal aperture in response to environmental conditions | <i>Increased protein folding; Increased translocation of precursor proteins into organelles; Increased degradation of damaged proteins; Promoted defense response; Increased response to abiotic stress and ABA signaling</i> | Sung, Dong Yul, and Charles L. Guy. "Physiological and molecular assessment of altered expression of Hsc70-1 in Arabidopsis. Evidence for pleiotropic consequences." <i>Plant Physiology</i> 132.2 (2003): 979-987.                                      |
| <i>Solyc01g060020.3</i> | 4.77           | glucan endo-1,3-beta-glucosidase B precursor           | N/A       | Involved in plant defense against pathogens                                                                                                                                                                                                                                                              | <i>Increased defense against pathogens</i>                                                                                                                                                                                    | van Kan, Jan AL, et al. "Differential accumulation of mRNAs encoding extracellular and intracellular PR proteins in tomato induced by virulent and avirulent races of <i>Cladosporium fulvum</i> ." <i>Plant molecular biology</i> 20.3 (1992): 513-527. |
| <i>Solyc11g011030.2</i> | 4.51           | Pto-responsive gene 1 protein                          | PTI1      | A serine-threonine kinase involved in the hypersensitive response-mediated signaling cascade                                                                                                                                                                                                             | <i>Promoted hypersensitive response-mediated signaling</i>                                                                                                                                                                    | Zhou, Jianmin, et al. "The tomato gene Pti1 encodes a serine/threonine kinase that is phosphorylated by Pto and is involved in the hypersensitive response." <i>Cell</i> 83.6 (1995): 925-935.                                                           |
| <i>Solyc04g079730.1</i> | 4.40           | allene oxide synthase                                  | CYP74A    | Involved in the synthesis of JA                                                                                                                                                                                                                                                                          | <i>Increased production of JA</i>                                                                                                                                                                                             | Laudert, Dietmar, et al. "Cloning, molecular and functional characterization of Arabidopsis thaliana allene oxide synthase (CYP 74), the first enzyme of the octadecanoid pathway to jasmonates." <i>Plant molecular biology</i> 31.2 (1996): 323-335.   |
| <i>Solyc02g090970.1</i> | 4.29           | mitogen-activated protein kinase kinase kinase 17-like | MAPKKK17  | Act as ABA signal transducer under abiotic stress                                                                                                                                                                                                                                                        | <i>Increased response to stress</i>                                                                                                                                                                                           | Danquah, Agyemang, et al. "Identification and characterization of an ABA-activated MAP kinase cascade in Arabidopsis thaliana." <i>The Plant Journal</i> 82.2 (2015): 232-244.                                                                           |
| <i>Solyc03g098730.1</i> | 4.26           | kunitz trypsin inhibitor 2                             | KTI2      | Involved in the control of cell death in the transmitting tract and septum epidermis during flower development; Plays a role in herbivore resistance during seedling greening                                                                                                                            | <i>Increased programmed cell death; Increased defense against herbivores</i>                                                                                                                                                  | Shoji, Tsubasa, Takayuki Ogawa, and Takashi Hashimoto. "Jasmonate-induced nicotine formation in tobacco is mediated by tobacco COI1 and JAZ genes." <i>Plant and cell physiology</i> 49.7 (2008): 1003-1012.                                             |
| <i>Solyc07g042170.3</i> | 4.24           | protein TIFY 10b-like                                  | AT1G74950 | Repressor of jasmonate responses; Negatively regulates root hair development                                                                                                                                                                                                                             | <i>Repressed jasmonate responses; Impaired root hair development</i>                                                                                                                                                          | Fernández-Calvo, Patricia, et al. "The Arabidopsis bHLH transcription factors MYC3 and MYC4 are targets of JAZ repressors and act additively with MYC2 in the activation of jasmonate responses." <i>The Plant Cell</i> 23.2 (2011): 701-715.            |

| TomatoID         | DE in Infected | NCBI Protein Name                                      | Gene ID      | Uniprot Description                                                                                                                                                  | Putative Consequences for Infection                                                                                               | Citation                                                                                                                                                                                                                                                              |
|------------------|----------------|--------------------------------------------------------|--------------|----------------------------------------------------------------------------------------------------------------------------------------------------------------------|-----------------------------------------------------------------------------------------------------------------------------------|-----------------------------------------------------------------------------------------------------------------------------------------------------------------------------------------------------------------------------------------------------------------------|
| Solyc08g036640.3 | 4.11           | protein TIFY 5A-like                                   | TIFY5A       | Repressor of jasmonate responses; Interacts with and suppresses RHD6 and RSL1 transcription factor activities to negatively regulate root hair development           | Repressed jasmonate responses; Impaired root hair development                                                                     | Chung, Hoo Sun, and Gregg A. Howe. "A critical role for the TIFY motif in repression of jasmonate signaling by a stabilized splice variant of the JASMONATE ZIM-domain protein JAZ10 in Arabidopsis." The Plant Cell 21.1 (2009): 131-145.                            |
| Solyc12g049400.2 | 4.10           | protein TIFY 10b-like                                  | AT1G74950    | Repressor of jasmonate responses; Negatively regulates root hair development                                                                                         | Repressed jasmonate responses; Impaired root hair development                                                                     | Fernández-Calvo, Patricia, et al. "The Arabidopsis bHLH transcription factors MYC3 and MYC4 are targets of JAZ repressors and act additively with MYC2 in the activation of jasmonate responses." The Plant Cell 23.2 (2011): 701-715.                                |
| Solyc01g007030.3 | 3.99           | E3 ubiquitin-protein ligase PUB22-like                 | PUB22        | Negatively regulates water stress response; Mediates drought signaling pathway; Negative regulator of immune response triggered by PAMPs                             | Impaired response to drought; Impaired response to PAMPs; Impaired attenuation to PAMP-induced signaling                          | Trujillo, Marco, et al. "Negative regulation of PAMP-triggered immunity by an E3 ubiquitin ligase triplet in Arabidopsis." Current Biology 18.18 (2008): 1396-1401.                                                                                                   |
| Solyc12g019320.2 | 3.99           | protein DETOXIFICATION 30-like                         | LOC107764941 | Xenobiotic transmembrane transporter activity                                                                                                                        | <i>Increased detoxification</i>                                                                                                   | Sierro, Nicolas, et al. "The tobacco genome sequence and its comparison with those of tomato and potato." Nature communications 5.1 (2014): 1-9.                                                                                                                      |
| Solyc07g041920.3 | 3.88           | cysteine proteinase 3-like                             | CYS3         | Involved in the regulation of endogenous processes; Involved in the regulation of defense against pests and pathogens                                                | <i>Promoted regulation of endogenous processes; Increased regulation of defense</i>                                               | Belenghi, Beatrice, et al. "AtCYS1, a cystatin from Arabidopsis thaliana, suppresses hypersensitive cell death." European Journal of Biochemistry 270.12 (2003): 2593-2604.                                                                                           |
| Solyc02g087210.3 | 3.79           | stress-associated protein 11                           | SAP11        | Involved in environmental stress response                                                                                                                            | <i>Increased response to environmental stress</i>                                                                                 | Vij, Shubha, and Akhilesh K. Tyagi. "Genome-wide analysis of the stress associated protein (SAP) gene family containing A20/AN1 zinc-finger (s) in rice and their phylogenetic relationship with Arabidopsis." Molecular Genetics and Genomics 276.6 (2006): 565-575. |
| Solyc11g018800.2 | 3.77           | lignin-forming anionic peroxidase                      | N/A          | Involved in removal of H2O2, oxidation of toxic reductants, biosynthesis and degradation of lignin, suberization, auxin catabolism, and response to biotic stressors | <i>Increased response to oxidative stress; Increased auxin catabolism; Increased defense against wounding and pathogen attack</i> | Lagrimini, L. Mark, et al. "Molecular cloning of complementary DNA encoding the lignin-forming peroxidase from tobacco: molecular analysis and tissue-specific expression." Proceedings of the National Academy of Sciences 84.21 (1987): 7542-7546.                  |
| Solyc08g036660.3 | 3.75           | protein TIFY 5A-like                                   | TIFY5A       | Repressor of jasmonate responses; Interacts with and suppresses RHD6 and RSL1 transcription factor activities to negatively regulate root hair development           | Repressed jasmonate responses; Impaired root hair development                                                                     | Chung, Hoo Sun, and Gregg A. Howe. "A critical role for the TIFY motif in repression of jasmonate signaling by a stabilized splice variant of the JASMONATE ZIM-domain protein JAZ10 in Arabidopsis." The Plant Cell 21.1 (2009): 131-145.                            |
| Solyc08g007830.1 | 3.72           | dehydration-responsive element-binding protein 1F-like | DREB1F       | Transcriptional activator that binds specifically to the C-repeat/DRE element mediating cold-inducible transcription                                                 | <i>Increased cold acclimation and freezing tolerance</i>                                                                          | Sakuma, Yoh, et al. "DNA-binding specificity of the ERF/AP2 domain of Arabidopsis DREBs, transcription factors involved in dehydration-and cold-inducible gene expression." Biochemical and biophysical research communications 290.3 (2002): 998-1009.               |

| TomatoID                | DE in Infected | NCBI Protein Name                                    | Gene ID | Uniprot Description                                                                                                                                                                                                          | Putative Consequences for Infection                                                                                                                                      | Citation                                                                                                                                                                              |
|-------------------------|----------------|------------------------------------------------------|---------|------------------------------------------------------------------------------------------------------------------------------------------------------------------------------------------------------------------------------|--------------------------------------------------------------------------------------------------------------------------------------------------------------------------|---------------------------------------------------------------------------------------------------------------------------------------------------------------------------------------|
| <i>Solyc11g071470.1</i> | 3.65           | agmatine hydroxycinnamoyltransferase 1-like          | AHT1    | Promotes the synthesis of hydroxycinnamic acid amides, which play a role in defense against pathogens                                                                                                                        | <i>Increased defense against pathogens</i>                                                                                                                               | Chen, Wei, et al. "Genome-wide association analyses provide genetic and biochemical insights into natural variation in rice metabolism." <i>Nature genetics</i> 46.7 (2014): 714-721. |
| <i>Solyc06g035700.1</i> | 3.64           | ethylene-responsive transcription factor ERF025-like | ERF025  | Binds to the GCC-box pathogenesis-related promoter element; Regulates gene expression under stress                                                                                                                           | <i>Increased response to stress and pathogenesis</i>                                                                                                                     | Riechmann, José Luis, et al. "Arabidopsis transcription factors: genome-wide comparative analysis among eukaryotes." <i>Science</i> 290.5499 (2000): 2105-2110.                       |
| <i>Solyc01g007040.3</i> | 3.63           | E3 ubiquitin-protein ligase PUB22-like               | PUB22   | Negatively regulates water stress response; Mediates drought signaling pathway; Negative regulator of immune response triggered by PAMPs                                                                                     | Impaired response to drought; Impaired response to PAMPs; Impaired attenuation to PAMP-induced signaling                                                                 | Trujillo, Marco, et al. "Negative regulation of PAMP-triggered immunity by an E3 ubiquitin ligase tripartite in Arabidopsis." <i>Current Biology</i> 18.18 (2008): 1396-1401.         |
| <i>Solyc12g057160.1</i> | 3.60           | classical arabinogalactan protein 5                  | AGP5    | Proteoglycan involved in differentiation, cell-cell recognition, embryogenesis, and programmed cell death                                                                                                                    | <i>Promoted plant growth/development and cell differentiation; Promoted programmed cell death</i>                                                                        | Thieme, Christoph J., et al. "Endogenous Arabidopsis messenger RNAs transported to distant tissues." <i>Nature Plants</i> 1.4 (2015): 1-9.                                            |
| <i>Solyc04g082140.3</i> | 3.52           | multicopper oxidase-like protein precursor           | LPR1    | Multicopper oxidase involved in Cu homeostasis and oxidative stress response; Necessary for root growth inhibition                                                                                                           | <i>Promoted Cu homeostasis; Increased response to oxidative stress; Root growth inhibition</i>                                                                           | Svistoonoff, Sergio, et al. "Root tip contact with low-phosphate media reprograms plant root architecture." <i>Nature genetics</i> 39.6 (2007): 792-796.                              |
| <i>Solyc10g009270.3</i> | 3.50           | transcription factor MYC2-like                       | MYC2    | Involved in the regulation of ABA-inducible genes under drought stress; Negative regulator of light-regulated gene expression and growth; Positive regulator of lateral root formation; Regulates sesquiterpene biosynthesis | <i>Promoted response to drought; Impaired response to light-mediated expression; Promoted lateral root formation; Increased regulation of sesquiterpene biosynthesis</i> | Abe, Hiroshi, et al. "Role of Arabidopsis MYC and MYB homologs in drought- and abscisic acid-regulated gene expression." <i>The Plant Cell</i> 9.10 (1997): 1859-1868.                |
| <i>Solyc06g083130.3</i> | 3.44           | dCTP pyrophosphatase 1                               | DCTPP1  | Hydrolyzes dNTPs to the corresponding nucleoside monophosphates; Protects DNA/RNA against the incorporation of these genotoxic nucleotide analogs through their catabolism                                                   | <i>Increased DNA/RNA protection against genotoxic nucleotide analogs</i>                                                                                                 | Cheng, Chia-Yi, et al. "Araport11: a complete reannotation of the Arabidopsis thaliana reference genome." <i>The Plant Journal</i> 89.4 (2017): 789-804.                              |
| <i>Solyc01g108240.3</i> | 3.44           | ethylene-responsive transcription factor ERF109      | ERF109  | Binds to the GCC-box pathogenesis-related promoter element; Regulates gene expression under stress                                                                                                                           | <i>Increased response to stress and pathogenesis</i>                                                                                                                     | Riechmann, José Luis, et al. "Arabidopsis transcription factors: genome-wide comparative analysis among eukaryotes." <i>Science</i> 290.5499 (2000): 2105-2110.                       |
| <i>Solyc03g122340.3</i> | 3.29           | lipoxigenase                                         | N/A     | Involved in growth and development, pest resistance, and senescence in response to wounding                                                                                                                                  | <i>Promoted plant growth/development, pest resistance, and senescence</i>                                                                                                | Chechetkin, I. R., et al. "Specificity of oxidation of linoleic acid homologs by plant lipoxigenases." <i>Biochemistry (Moscow)</i> 74.8 (2009): 855-861.                             |

| TomatoID                | DE in Infected | NCBI Protein Name                                              | Gene ID   | Uniprot Description                                                                                                                                                             | Putative Consequences for Infection                                                                         | Citation                                                                                                                                                                                                                                                                                 |
|-------------------------|----------------|----------------------------------------------------------------|-----------|---------------------------------------------------------------------------------------------------------------------------------------------------------------------------------|-------------------------------------------------------------------------------------------------------------|------------------------------------------------------------------------------------------------------------------------------------------------------------------------------------------------------------------------------------------------------------------------------------------|
| <i>Solyc10g050970.1</i> | 3.26           | ethylene-responsive transcription factor ERF109-like           | ERF109    | Regulates gene expression under stress                                                                                                                                          | <i>Increased response to stress and pathogenesis</i>                                                        | Riechmann, José Luis, et al. "Arabidopsis transcription factors: genome-wide comparative analysis among eukaryotes." <i>Science</i> 290.5499 (2000): 2105-2110.                                                                                                                          |
| <i>Solyc03g124110.2</i> | 3.14           | dehydration-responsive element-binding protein 1A              | DREB1A    | Transcriptional activator that binds specifically to the C-repeat/DRE element mediating cold-inducible transcription                                                            | <i>Increased cold acclimation and freezing tolerance</i>                                                    | Alonso-Blanco, Carlos, et al. "Genetic and molecular analyses of natural variation indicate CBF2 as a candidate gene for underlying a freezing tolerance quantitative trait locus in Arabidopsis." <i>Plant Physiology</i> 139.3 (2005): 1304-1312.                                      |
| <i>Solyc04g063210.3</i> | 3.14           | probable caffeoyl-CoA O-methyltransferase At4g26220 isoform X2 | AT4G26220 | Plays a role in the synthesis of feruloylated polysaccharides; Involved in the reinforcement of the plant cell wall; Involved in response to wounding and/or pathogen challenge | <i>Increased reinforcement of plant cell walls; Promoted response to wounding and/or pathogen challenge</i> | Meyermans, Hugo, et al. "Modifications in lignin and accumulation of phenolic glucosides in poplar xylem upon down-regulation of caffeoyl-coenzyme A O-methyltransferase, an enzyme involved in lignin biosynthesis." <i>Journal of Biological Chemistry</i> 275.47 (2000): 36899-36909. |
| <i>Solyc08g068710.1</i> | 3.12           | tyramine N-feruloyltransferase 4/11-like                       | THT4      | Synthesizes amides which are involved in stress response in the cell wall                                                                                                       | <i>Promoted stress response in the plant cell wall</i>                                                      | Farmer, Mary Jo, et al. "Identification and characterization of cDNA clones encoding hydroxycinnamoyl-CoA: tyramine N-hydroxycinnamoyltransferase from tobacco." <i>European journal of biochemistry</i> 263.3 (1999): 686-694.                                                          |
| <i>Solyc01g005870.2</i> | 3.11           | receptor-like protein Cf-9                                     | CF-9      | Involved in plant defense; Confers resistance to the fungal pathogen                                                                                                            | <i>Promoted defense against certain fungal pathogens</i>                                                    | van der Hoorn, Renier AL, et al. "Structure-function analysis of cf-9, a receptor-like protein with extracytoplasmic leucine-rich repeats." <i>The Plant Cell</i> 17.3 (2005): 1000-1015.                                                                                                |
| <i>Solyc01g105650.3</i> | 3.10           | protein DMR6-LIKE OXYGENASE 2-like                             | DLO2      | Component of a negative feedback regulation system of SA levels; Negative regulator of defense against certain pathogens                                                        | Negative system regulation of SA; Down regulator of defense against certain pathogens                       | Zeilmaker, Tieme, et al. "DOWNY MILDEW RESISTANT 6 and DMR 6-LIKE OXYGENASE 1 are partially redundant but distinct suppressors of immunity in Arabidopsis." <i>The Plant Journal</i> 81.2 (2015): 210-222.                                                                               |
| <i>Solyc12g009240.1</i> | 3.09           | ethylene-responsive transcription factor ERF017                | ERF017    | Regulates gene expression under stress                                                                                                                                          | <i>Increased response to stress and pathogenesis</i>                                                        | Riechmann, José Luis, et al. "Arabidopsis transcription factors: genome-wide comparative analysis among eukaryotes." <i>Science</i> 290.5499 (2000): 2105-2110.                                                                                                                          |
| <i>Solyc07g006890.1</i> | 3.08           | cytochrome P450 94A1-like                                      | CYP94A1   | Catalyzes the omega-hydroxylation of various fatty acids; Plays a minor role in cutin synthesis and plant defense                                                               | <i>Increased cutin synthesis and plant defense</i>                                                          | TUET, Nathalie, et al. "Functional expression in yeast and characterization of a clofibrate-inducible plant cytochrome P-450 (CYP94A1) involved in cutin monomers synthesis." <i>Biochemical Journal</i> 332.2 (1998): 583-589.                                                          |
| <i>Solyc12g005450.1</i> | 3.07           | probable receptor-like protein kinase At4g10390                | AT4G10390 | Involved in protein phosphorylation; Involved in response to wounding                                                                                                           | <i>Increased protein phosphorylation; Promoted response to wounding</i>                                     | Peng, Mingsheng, et al. "Genome-wide analysis of Arabidopsis responsive transcriptome to nitrogen limitation and its regulation by the ubiquitin ligase gene NLA." <i>Plant molecular biology</i> 65.6 (2007): 775-797.                                                                  |
| <i>Solyc07g048060.2</i> | 3.06           | cytochrome b561 and DOMON domain-containing protein At5g48750  | AT5G48750 | Involved in oxidation-reduction process                                                                                                                                         | <i>Improved oxidation-reduction</i>                                                                         | Kotani, Hirokazu, et al. "Structural analysis of Arabidopsis thaliana chromosome 5. VI. Sequence features of the regions of 1,367,185 bp covered by 19 physically assigned P1 and TAC clones." <i>DNA Research</i> 5.3 (1998): 203-216.                                                  |

| TomatoID                | DE in Infected | NCBI Protein Name                             | Gene ID | Uniprot Description                                                                                                                                                                 | Putative Consequences for Infection                                                                                                         | Citation                                                                                                                                                                                                                               |
|-------------------------|----------------|-----------------------------------------------|---------|-------------------------------------------------------------------------------------------------------------------------------------------------------------------------------------|---------------------------------------------------------------------------------------------------------------------------------------------|----------------------------------------------------------------------------------------------------------------------------------------------------------------------------------------------------------------------------------------|
| <i>Solyc01g097520.3</i> | 3.03           | annexin D4-like                               | ANN4    | Involved in osmotic stress response and ABA signaling                                                                                                                               | <i>Increased osmotic stress and ABA signaling</i>                                                                                           | Lee, Sumin, et al. "Proteomic identification of annexins, calcium-dependent membrane binding proteins that mediate osmotic stress and abscisic acid signal transduction in Arabidopsis." <i>The Plant Cell</i> 16.6 (2004): 1378-1391. |
| <i>Solyc03g111290.1</i> | 3.03           | cytochrome P450 94B3-like                     | CYP94B3 | Hydroxylase involved in the oxidation of the plant hormone JA-Ile; Exerts negative feedback control on JA-Ile levels and plays a key role in attenuation of jasmonate responses     | <i>Promoted attenuation to JA-Ile and response to jasmonate</i>                                                                             | Kitaoka, Naoki, et al. "Arabidopsis CYP94B3 encodes jasmonyl-L-isoleucine 12-hydroxylase, a key enzyme in the oxidative catabolism of jasmonate." <i>Plant and Cell Physiology</i> 52.10 (2011): 1757-1765.                            |
| <i>Solyc03g119980.3</i> | 3.03           | caffeoylshikimate esterase                    | CSE     | Involved in the biosynthesis of lignin; Promotes the degradation of lysophosphatidylcholine and detoxifies the peroxidized membrane in response to cadmium-induced oxidative stress | <i>Increased biosynthesis of lignin; Increased detoxification of peroxidized membrane; Increased response to oxidative stress</i>           | Gao, Wei, et al. "Acyl-CoA-binding protein 2 binds lysophospholipase 2 and LysoPC to promote tolerance to cadmium-induced oxidative stress in transgenic Arabidopsis." <i>The Plant Journal</i> 62.6 (2010): 989-1003.                 |
| <i>Solyc07g007760.3</i> | 2.99           | defensin-like protein precursor               | FST     | Involved in floral organogenesis; Protects reproductive organs from potential pathogen attack                                                                                       | <i>Promoted floral organogenesis; Increased defense against pathogens in reproductive organs</i>                                            | Gu, Qing, et al. "A flower-specific cDNA encoding a novel thionin in tobacco." <i>Molecular and general genetics</i> MGG 234.1 (1992): 89-96.                                                                                          |
| <i>Solyc01g087590.3</i> | 2.98           | polyamine oxidase 1                           | PAO1    | Plays an important role in the regulation of polyamine intracellular concentration; Involved in the production of hydrogen peroxide in response to salt and cold stresses           | <i>Increased polyamine intracellular concentration; Involved in the production of hydrogen peroxide in response to salt and cold stress</i> | Tavladoraki, Paraskevi, et al. "Heterologous expression and biochemical characterization of a polyamine oxidase from Arabidopsis involved in polyamine back conversion." <i>Plant Physiology</i> 141.4 (2006): 1519-1532.              |
| <i>Solyc02g085730.3</i> | 2.98           | allene oxide cyclase isoform 1, chloroplastic | AOC1    | Involved in the production of 12-oxo-phytodienoic acid, a precursor of JA                                                                                                           | <i>Increased production of JA precursor</i>                                                                                                 | Zhai, Qingzhe, et al. "Phytochrome chromophore deficiency leads to overproduction of jasmonic acid and elevated expression of jasmonate-responsive genes in Arabidopsis." <i>Plant and Cell Physiology</i> 48.7 (2007): 1061-1071.     |
| <i>Solyc01g007020.3</i> | 2.92           | E3 ubiquitin-protein ligase PUB22-like        | PUB22   | Negatively regulates water stress response; Mediates drought signaling pathway; Negative regulator of immune response triggered by PAMPs                                            | Impaired response to drought; Impaired response to PAMPs; Impaired attenuation to PAMP-induced signaling                                    | Trujillo, Marco, et al. "Negative regulation of PAMP-triggered immunity by an E3 ubiquitin ligase triplet in Arabidopsis." <i>Current Biology</i> 18.18 (2008): 1396-1401.                                                             |
| <i>Solyc04g082200.2</i> | 2.88           | dehydrin                                      | dhn     | Involved in drought response                                                                                                                                                        | <i>Promoted drought response</i>                                                                                                            | Sander, I., et al. "Multiple wheat flour allergens and cross-reactive carbohydrate determinants bind IgE in baker's asthma." <i>Allergy</i> 66.9 (2011): 1208-1215.                                                                    |
| <i>Solyc07g063410.3</i> | 2.88           | NAC domain-containing protein JA2L            | JA2L    | Transcription factor that acts in the jasmonate-mediated response to infection; Involved in jasmonate- and coronatine-mediated stomatal reopening in response to infection          | <i>Promoted jasmonate- and coronatine-mediated response to infection</i>                                                                    | Du, Minmin, et al. "MYC2 orchestrates a hierarchical transcriptional cascade that regulates jasmonate-mediated plant immunity in tomato." <i>The Plant Cell</i> 29.8 (2017): 1883-1906.                                                |

| TomatoID                | DE in Infected | NCBI Protein Name                                  | Gene ID | Uniprot Description                                                                                                                                                                                                                      | Putative Consequences for Infection                                                                                                   | Citation                                                                                                                                                                                                                                      |
|-------------------------|----------------|----------------------------------------------------|---------|------------------------------------------------------------------------------------------------------------------------------------------------------------------------------------------------------------------------------------------|---------------------------------------------------------------------------------------------------------------------------------------|-----------------------------------------------------------------------------------------------------------------------------------------------------------------------------------------------------------------------------------------------|
| <i>Solyc10g076240.2</i> | 2.86           | cationic peroxidase 1                              | PNC1    | Involved in removal of H <sub>2</sub> O <sub>2</sub> , oxidation of toxic reductants, biosynthesis/degradation of lignin, suberization, auxin catabolism, and response to environmental stressors                                        | <i>Promoted response to oxidative stress and other environmental stressors; Increased lignin and auxin metabolism</i>                 | Buffard, Dominique, et al. "Molecular cloning of complementary DNAs encoding two cationic peroxidases from cultivated peanut cells." <i>Proceedings of the National Academy of Sciences</i> 87.22 (1990): 8874-8878.                          |
| <i>Solyc03g093360.3</i> | 2.81           | PLAT domain-containing protein 3                   | PLAT3   | Involved in response to abiotic stress                                                                                                                                                                                                   | <i>Promoted response to abiotic stress</i>                                                                                            | Moskal, William A., et al. "Experimental validation of novel genes predicted in the un-annotated regions of the Arabidopsis genome." <i>BMC genomics</i> 8.1 (2007): 18.                                                                      |
| <i>Solyc09g066360.1</i> | 2.80           | ethylene-response factor C3                        | ERF.C.3 | Acts downstream of MYC2 in the jasmonate-mediated response to infection                                                                                                                                                                  | <i>Increased ethylene-responsive signaling; Promoted jasmonate-mediated defense against pathogens</i>                                 | Du, Minmin, et al. "MYC2 orchestrates a hierarchical transcriptional cascade that regulates jasmonate-mediated plant immunity in tomato." <i>The Plant Cell</i> 29.8 (2017): 1883-1906.                                                       |
| <i>Solyc04g071770.3</i> | 2.79           | ethylene-responsive transcription factor ABR1-like | ABR1    | Negative regulator of the ABA signaling pathway involved in seed germination and in response to stressors                                                                                                                                | <i>Increased ABA signaling; Increased response to stress and pathogenesis</i>                                                         | Pandey, Giridhar K., et al. "ABR1, an APETALA2-domain transcription factor that functions as a repressor of ABA response in Arabidopsis." <i>Plant Physiology</i> 139.3 (2005): 1185-1193.                                                    |
| <i>Solyc10g054440.2</i> | 2.78           | arginine decarboxylase 1                           | ADC1    | Catalyzes the first step of polyamine biosynthesis to produce putrescine from arginine; Controls polyamine homeostasis which is crucial for normal plant growth and development                                                          | <i>Increased freezing tolerance; Increased seed production; Promoted growth/development</i>                                           | Hanfrey, Colin, et al. "Arabidopsis polyamine biosynthesis: absence of ornithine decarboxylase and the mechanism of arginine decarboxylase activity." <i>The Plant Journal</i> 27.6 (2001): 551-560.                                          |
| <i>Solyc03g093610.1</i> | 2.77           | ethylene response factor A.2                       | ERF2    | Involved in defense response; Involved in intracellular signal transduction; Involved in lipid metabolism                                                                                                                                | <i>Increased defense response; Increased intracellular signal transduction; Increased lipid metabolism</i>                            | Zhang, Zhijin, et al. "Transcriptional regulation of the ethylene response factor LeERF2 in the expression of ethylene biosynthesis genes controls ethylene production in tomato and tobacco." <i>Plant Physiology</i> 150.1 (2009): 365-377. |
| <i>Solyc04g079360.1</i> | 2.77           | transcription factor MYB44-like                    | MYB44   | Represses the expression of protein phosphatases 2C in response to ABA; Auxin-responsive; Promotes SA-mediated defense, but represses JA-mediated defense                                                                                | <i>Increases response to ABA; Increased response to auxin signaling; Increases SA-mediated defense; Decreased JA-mediated defense</i> | Riechmann, José Luis, et al. "Arabidopsis transcription factors: genome-wide comparative analysis among eukaryotes." <i>Science</i> 290.5499 (2000): 2105-2110.                                                                               |
| <i>Solyc12g005640.2</i> | 2.74           | transcription factor MYB14-like                    | MYB14   | Transcription activator that regulates freezing tolerance by affecting expression of CBF genes                                                                                                                                           | <i>Promoted regulation of freezing tolerance</i>                                                                                      | Chen, Yan, et al. "AtMYB14 regulates cold tolerance in Arabidopsis." <i>Plant molecular biology reporter</i> 31.1 (2013): 87-97.                                                                                                              |
| <i>Solyc08g008280.3</i> | 2.73           | probable WRKY transcription factor 53              | WRKY53  | Transcription factor regulating the early events of leaf senescence; Negatively regulates the expression of ESR/ESP; Promotes resistance to certain pathogens by enhancing SA- dependent genes; Contributes to the suppression of PDF1.2 | <i>Down regulation of ESR/ESP; Promoted resistance to certain pathogens by enhancing SA- dependent genes; Suppression of PDF1.2</i>   | Miao, Ying, and Ulrike Zentgraf. "The antagonist function of Arabidopsis WRKY53 and ESR/ESP in leaf senescence is modulated by the jasmonic and salicylic acid equilibrium." <i>The Plant Cell</i> 19.3 (2007): 819-830.                      |

| TomatoID                | DE in Infected | NCBI Protein Name                                    | Gene ID      | Uniprot Description                                                                                                                                 | Putative Consequences for Infection                                                                                                          | Citation                                                                                                                                                                                                                                                             |
|-------------------------|----------------|------------------------------------------------------|--------------|-----------------------------------------------------------------------------------------------------------------------------------------------------|----------------------------------------------------------------------------------------------------------------------------------------------|----------------------------------------------------------------------------------------------------------------------------------------------------------------------------------------------------------------------------------------------------------------------|
| <i>Solyc04g054990.3</i> | 2.71           | PLAT domain-containing protein 2                     | PLAT2        | Involved in response to abiotic stress                                                                                                              | <i>Promoted response to abiotic stress</i>                                                                                                   | Giacomelli, Lisa, Andrea Rudella, and Klaas Jan van Wijk. "High light response of the thylakoid proteome in Arabidopsis wild type and the ascorbate-deficient mutant <i>vtc2-2</i> . A comparative proteomics study." <i>Plant Physiology</i> 141.2 (2006): 685-701. |
| <i>Solyc09g089500.3</i> | 2.71           | proteinase inhibitor I-B-like isoform X2             | LOC107794480 | Involved in response to wounding                                                                                                                    | <i>Promoted response to wounding</i>                                                                                                         | Sierro, Nicolas, et al. "The tobacco genome sequence and its comparison with those of tomato and potato." <i>Nature communications</i> 5.1 (2014): 1-9.                                                                                                              |
| <i>Solyc03g080190.3</i> | 2.70           | protein DMR6-like oxygenase                          | DLO1         | Component of negative feedback regulation of SA during senescence; Negative regulator of defense against certain pathogens                          | <i>Negative system regulation of SA; Promoted leaf senescence; Down regulator of defense against certain pathogens</i>                       | Zeilmaker, Tieme, et al. "DOWNY MILDEW RESISTANT 6 and DMR 6-LIKE OXYGENASE 1 are partially redundant but distinct suppressors of immunity in Arabidopsis." <i>The Plant Journal</i> 81.2 (2015): 210-222.                                                           |
| <i>Solyc07g042230.1</i> | 2.69           | ethylene-responsive transcription factor ERF018-like | ERF018       | Binds to the GCC-box pathogenesis-related promoter element; Regulates gene expression under stress                                                  | <i>Increased response to stress and pathogenesis</i>                                                                                         | Riechmann, José Luis, et al. "Arabidopsis transcription factors: genome-wide comparative analysis among eukaryotes." <i>Science</i> 290.5499 (2000): 2105-2110.                                                                                                      |
| <i>Solyc04g009440.3</i> | 2.68           | NAC domain protein                                   | NAC002       | Involved in cellular response to hypoxia; Involved in regulation of ABA-activated signaling pathway; Involved in response to wounding               | <i>Increased cellular response to hypoxia; Increased in regulation of ABA-activated signaling pathway; Increased in response to wounding</i> | "Molecular characterization of Brassica napus NAC domain transcriptional activators induced in response to biotic and abiotic stress."                                                                                                                               |
| <i>Solyc06g074420.1</i> | 2.67           | cytochrome P450 94C1                                 | CYP94C1      | Hydroxylase involved in the oxidation of JA-Ile; Exerts negative feedback control on JA-Ile levels and plays a key role in attenuation to jasmonate | <i>Promoted attenuation to JA-Ile and response to jasmonate</i>                                                                              | Kandel, Sylvie, et al. "Characterization of a methyl jasmonate and wounding-responsive cytochrome P450 of Arabidopsis thaliana catalyzing dicarboxylic fatty acid formation in vitro." <i>The FEBS journal</i> 274.19 (2007): 5116-5127.                             |
| <i>Solyc03g122190.3</i> | 2.66           | salt responsive protein 1                            | SISR1        | Involved in regulation of defense; Involved in regulation of JA-mediated signaling pathway                                                          | <i>Promoted regulation of defense; Promoted regulation of JA-mediated signaling pathway</i>                                                  | Ouyang, Bo, et al. "Identification of early salt stress response genes in tomato root by suppression subtractive hybridization and microarray analysis." <i>Journal of experimental botany</i> 58.3 (2007): 507-520.                                                 |
| <i>Solyc10g081570.2</i> | 2.65           | ABC transporter F family member 4                    | ABCF4        | Involved in drought and pathogen resistance                                                                                                         | <i>Increased resistance to drought and pathogens</i>                                                                                         | Kaundal, Amita, et al. "GENERAL CONTROL NONREPRESSIBLE4 degrades 14-3-3 and the RIN4 complex to regulate stomatal aperture with implications on nonhost disease resistance and drought tolerance." <i>The Plant Cell</i> 29.9 (2017): 2233-2248.                     |
| <i>Solyc08g007840.2</i> | 2.64           | ethylene-responsive transcription factor ERF027-like | ERF027       | Binds to the GCC-box pathogenesis-related promoter element; Regulates gene expression under stress                                                  | <i>Increased response to stress and pathogenesis</i>                                                                                         | Riechmann, José Luis, et al. "Arabidopsis transcription factors: genome-wide comparative analysis among eukaryotes." <i>Science</i> 290.5499 (2000): 2105-2110.                                                                                                      |
| <i>Solyc03g026270.3</i> | 2.62           | dehydration-responsive element-binding protein 1A    | DREB1A       | Transcriptional activator that binds specifically to the C-repeat/DRE element mediating cold-inducible transcription                                | <i>Increased cold acclimation and freezing tolerance</i>                                                                                     | Sakuma, Yoh, et al. "DNA-binding specificity of the ERF/AP2 domain of Arabidopsis DREBs, transcription factors involved in dehydration- and cold-inducible gene expression." <i>Biochemical and biophysical research communications</i> 290.3 (2002): 998-1009.      |

| TomatoID                | DE in Infected | NCBI Protein Name                                          | Gene ID  | Uniprot Description                                                                                                                                     | Putative Consequences for Infection                                                                                              | Citation                                                                                                                                                                                                                                                                                           |
|-------------------------|----------------|------------------------------------------------------------|----------|---------------------------------------------------------------------------------------------------------------------------------------------------------|----------------------------------------------------------------------------------------------------------------------------------|----------------------------------------------------------------------------------------------------------------------------------------------------------------------------------------------------------------------------------------------------------------------------------------------------|
| <i>Solyc12g099000.2</i> | 2.62           | S-adenosylmethionine synthase 2                            | SAM2     | Involved in SA-mediated defense                                                                                                                         | <i>Increased S-adenosylmethionine production; Promoted early defense response</i>                                                | Rajjou, Loïc, et al. "Proteomic investigation of the effect of salicylic acid on Arabidopsis seed germination and establishment of early defense mechanisms." <i>Plant physiology</i> 141.3 (2006): 910-923.                                                                                       |
| <i>Solyc09g006010.2</i> | 2.57           | pathogenesis-related leaf protein 4                        | N/A      | Involved in defense response against pathogens                                                                                                          | <i>Promoted defense against pathogens</i>                                                                                        | van Kan, Jan AL, et al. "Differential accumulation of mRNAs encoding extracellular and intracellular PR proteins in tomato induced by virulent and avirulent races of <i>Cladosporium fulvum</i> ." <i>Plant molecular biology</i> 20.3 (1992): 513-527.                                           |
| <i>Solyc10g083970.1</i> | 2.57           | S-adenosylmethionine synthase 3-like                       | METK3    | Catalyzes the formation of S-adenosylmethionine from methionine; Involved in SA-mediated defense; Involved in the biosynthesis of lignin                | <i>Increased S-adenosylmethionine production; Promoted early defense response; Increased lignin biosynthesis</i>                 | Goto, Derek B., et al. "A single-nucleotide mutation in a gene encoding S-adenosylmethionine synthase is associated with methionine over-accumulation phenotype in <i>Arabidopsis thaliana</i> ." <i>Genes &amp; genetic systems</i> 77.2 (2002): 89-95.                                           |
| <i>Solyc12g008350.2</i> | 2.57           | dehydration responsive element binding protein             | DREB     | Transcriptional activator that binds specifically to the C-repeat/DRE element mediating cold-inducible transcription                                    | <i>Increased cold acclimation and freezing tolerance</i>                                                                         | Alonso-Blanco, Carlos, et al. "Genetic and molecular analyses of natural variation indicate CBF2 as a candidate gene for underlying a freezing tolerance quantitative trait locus in <i>Arabidopsis</i> ." <i>Plant Physiology</i> 139.3 (2005): 1304-1312.                                        |
| <i>Solyc12g057150.1</i> | 2.55           | classical arabinogalactan protein 5                        | AGP5     | Proteoglycan involved in differentiation, cell-cell recognition, embryogenesis, and programmed cell death                                               | <i>Promoted plant growth/development and cell differentiation; Promoted programmed cell death</i>                                | Thieme, Christoph J., et al. "Endogenous <i>Arabidopsis</i> messenger RNAs transported to distant tissues." <i>Nature Plants</i> 1.4 (2015): 1-9.                                                                                                                                                  |
| <i>Solyc02g064980.1</i> | 2.53           | mitogen-activated protein kinase kinase kinase 18-like     | MAPKKK18 | Act as ABA signal transducer under abiotic stress; Promotes stomatal growth/development; Inhibits germination and root growth; Promotes leaf senescence | <i>Increased response to stress; Increased reproductive development; Decreased growth/development; Increased leaf senescence</i> | Mitula, Filip, et al. "Arabidopsis ABA-activated kinase MAPKKK18 is regulated by protein phosphatase 2C ABI1 and the ubiquitin-proteasome pathway." <i>Plant and Cell Physiology</i> 56.12 (2015): 2351-2367.                                                                                      |
| <i>Solyc10g086690.2</i> | 2.53           | phosphatidylinositol:ceramide inositolphosphotransferase 2 | IPCS2    | Essential for sphingolipid biosynthesis; Plays an important role in modulating plant programmed cell death                                              | <i>Increased sphingolipid biosynthesis; Promoted programmed cell death</i>                                                       | Wang, Wenming, et al. "An inositolphosphorylceramide synthase is involved in regulation of plant programmed cell death associated with defense in <i>Arabidopsis</i> ." <i>The Plant Cell</i> 20.11 (2008): 3163-3179.                                                                             |
| <i>Solyc05g008370.1</i> | 2.52           | probable ribose-5-phosphate isomerase 2                    | RPI2     | Involved in programmed cell death; Involved in vegetative-to-reproductive phase transition in meristems                                                 | <i>Increased primary metabolism; Promoted programmed cell death; Promoted transition from vegetative-to-reproductive phase</i>   | Xiong, Yuqing, et al. "Deficiency in a cytosolic ribose-5-phosphate isomerase causes chloroplast dysfunction, late flowering and premature cell death in <i>Arabidopsis</i> ." <i>Physiologia plantarum</i> 137.3 (2009): 249-263.                                                                 |
| <i>Solyc06g068650.3</i> | 2.50           | 4-coumarate--CoA ligase                                    | 4CL1     | Produces CoA thioesters of a variety of hydroxy- and methoxy-substituted cinnamic acids                                                                 | <i>Increased production of phenylproanoid-derived compounds; Increased JA biosynthesis</i>                                       | Ehltng, Jürgen, Jane JK Shin, and Carl J. Douglas. "Identification of 4-coumarate: coenzyme A ligase (4CL) substrate recognition domains." <i>The Plant Journal</i> 27.5 (2001): 455-465.                                                                                                          |
| <i>Solyc08g062330.3</i> | 2.49           | ankyrin repeat-containing protein ITN1-like                | ITN1     | Involved in salt stress tolerance; Acts through ABA signaling pathways and promotes ROS production                                                      | <i>Increased salt stress tolerance; Increased ROS production</i>                                                                 | Sakamoto, Hikaru, Osamu Matsuda, and Koh Iba. "ITN1, a novel gene encoding an ankyrin-repeat protein that affects the ABA-mediated production of reactive oxygen species and is involved in salt-stress tolerance in <i>Arabidopsis thaliana</i> ." <i>The Plant Journal</i> 56.3 (2008): 411-422. |

| TomatoID                | DE in Infected | NCBI Protein Name                                                            | Gene ID   | Uniprot Description                                                                                                                                                              | Putative Consequences for Infection                                                                                        | Citation                                                                                                                                                                                                                                                           |
|-------------------------|----------------|------------------------------------------------------------------------------|-----------|----------------------------------------------------------------------------------------------------------------------------------------------------------------------------------|----------------------------------------------------------------------------------------------------------------------------|--------------------------------------------------------------------------------------------------------------------------------------------------------------------------------------------------------------------------------------------------------------------|
| <i>Solyc12g097000.2</i> | 2.46           | TMV resistance protein N-like                                                | N         | Disease resistance protein; Triggers plant defense systems, including the hypersensitive response                                                                                | <i>Increased hypersensitive response</i>                                                                                   | Dinesh-Kumar, S. P., and Barbara J. Baker. "Alternatively spliced N resistance gene transcripts: their possible role in tobacco mosaic virus resistance." <i>Proceedings of the National Academy of Sciences</i> 97.4 (2000): 1908-1913.                           |
| <i>Solyc07g062700.3</i> | 2.43           | sodium/calcium exchanger NCL                                                 | NCL       | Participates in the maintenance of calcium homeostasis; Plays a role in auxin response, diurnal rhythm, and flowering time; Involved in salt stress response                     | <i>Promoted calcium homeostasis; Increased response to auxin; Promoted circadian rhythm; Promoted salt stress response</i> | Wang, Peng, et al. "A Na <sup>+</sup> /Ca <sup>2+</sup> exchanger-like protein (AtNCL) involved in salt stress in Arabidopsis." <i>Journal of Biological Chemistry</i> 287.53 (2012): 44062-44070.                                                                 |
| <i>Solyc08g068770.2</i> | 2.43           | N-hydroxycinnamoyl-CoA:tyramine N-hydroxycinnamoyl transferase THT1-3        | THT1-3    | Involved in the production of p-Coumaroylnoradrenaline                                                                                                                           | <i>Increased defense against pathogens</i>                                                                                 | von Roepenack-Lahaye, Edda, et al. "p-Coumaroylnoradrenaline, a novel plant metabolite implicated in tomato defense against pathogens." <i>Journal of Biological Chemistry</i> 278.44 (2003): 43373-43383.                                                         |
| <i>Solyc02g089900.1</i> | 2.42           | lysM domain receptor-like kinase 4                                           | LYK4      | Lysin motif receptor kinase that functions as a cell surface receptor in chitin elicitor signaling leading to innate immunity against certain fungal and bacterial pathogens     | <i>Promoted innate immunity; Increased resistance to certain fungal and bacterial pathogens</i>                            | Wan, Jinrong, et al. "LYK4, a lysin motif receptor-like kinase, is important for chitin signaling and plant innate immunity in Arabidopsis." <i>Plant physiology</i> 160.1 (2012): 396-406.                                                                        |
| <i>Solyc02g093250.3</i> | 2.42           | caffeoyl-CoA O-methyltransferase-like                                        | CCOAMT1   | Involved in the reinforcement of the plant cell wall; Involved in response to wounding or pathogen challenge by promoting the formation of cell wall-bound ferulic acid polymers | <i>Increased production of polysaccharides; Reinforced cell wall; Increased response to wounding and pathogens</i>         | Do, Cao-Trung, et al. "Both caffeoyl Coenzyme A 3-O-methyltransferase 1 and caffeic acid O-methyltransferase 1 are involved in redundant functions for lignin, flavonoids and sinapoyl malate biosynthesis in Arabidopsis." <i>Planta</i> 226.5 (2007): 1117-1129. |
| <i>Solyc01g096430.3</i> | 2.41           | NAD(P)H:quinone oxidoreductase                                               | NQR       | Serves as a quinone reductase in connection with conjugation reactions of hydroquinones involved in detoxification                                                               | <i>Increased detoxification</i>                                                                                            | Sparla, Francesca, et al. "Cloning and heterologous expression of NAD(P)H: quinone reductase of Arabidopsis thaliana, a functional homologue of animal DT-diaphorase." <i>FEBS letters</i> 463.3 (1999): 382-386.                                                  |
| <i>Solyc09g007260.3</i> | 2.37           | ethylene-responsive transcription factor RAP2-7-like                         | RAP2-7    | Regulates gene expression under stress; Negatively regulates flowering                                                                                                           | <i>Increased response to stress and pathogenesis; Flowering delay</i>                                                      | Riechmann, José Luis, et al. "Arabidopsis transcription factors: genome-wide comparative analysis among eukaryotes." <i>Science</i> 290.5499 (2000): 2105-2110.                                                                                                    |
| <i>Solyc03g117870.3</i> | 2.36           | 4-coumarate--CoA ligase                                                      | 4CL1      | Produces CoA thioesters of a variety of hydroxy- and methoxy-substituted cinnamic acids                                                                                          | <i>Increased production of phenylpropanoid-derived compounds; Increased JA biosynthesis</i>                                | Ehltng, Jürgen, Jane JK Shin, and Carl J. Douglas. "Identification of 4-coumarate: coenzyme A ligase (4CL) substrate recognition domains." <i>The Plant Journal</i> 27.5 (2001): 455-465.                                                                          |
| <i>Solyc07g006480.3</i> | 2.33           | probably inactive leucine rich repeat receptor-like protein kinase At5g48380 | AT5G48380 | Negative regulator of defense response to bacteria; Negative regulator of programmed cell death                                                                                  | <i>Impaired defense response to bacteria; Impaired programmed cell death</i>                                               | Gao, Minghui, et al. "Regulation of cell death and innate immunity by two receptor-like kinases in Arabidopsis." <i>Cell host &amp; microbe</i> 6.1 (2009): 34-44.                                                                                                 |

| TomatoID         | DE in Infected | NCBI Protein Name                           | Gene ID   | Uniprot Description                                                                                                                                                                                                     | Putative Consequences for Infection                                                                                                                                                                                 | Citation                                                                                                                                                                                                                                                              |
|------------------|----------------|---------------------------------------------|-----------|-------------------------------------------------------------------------------------------------------------------------------------------------------------------------------------------------------------------------|---------------------------------------------------------------------------------------------------------------------------------------------------------------------------------------------------------------------|-----------------------------------------------------------------------------------------------------------------------------------------------------------------------------------------------------------------------------------------------------------------------|
| Solyc04g071890.3 | 2.30           | peroxidase 12 precursor                     | PER12     | Involved in removal of H <sub>2</sub> O <sub>2</sub> , oxidation of toxic reductants, biosynthesis and degradation of lignin, suberization, auxin catabolism, and response to environmental stressors                   | <i>Increased removal of H<sub>2</sub>O<sub>2</sub>, oxidation of toxic reductants, biosynthesis and degradation of lignin, suberization, auxin catabolism, and response to environmental stressors</i>              | Paynel, Florence, et al. "Temporal regulation of cell-wall pectin methyltransferase and peroxidase isoforms in cadmium-treated flax hypocotyl." <i>Annals of botany</i> 104.7 (2009): 1363-1372.                                                                      |
| Solyc01g096320.3 | 2.29           | homeobox-leucine zipper protein ATHB-12     | ATHB-12   | Transcription activator that acts as a growth regulator in response to water deficit                                                                                                                                    | <i>Increased regulation of growth/development; Increased response to drought</i>                                                                                                                                    | Olsson, Anna, Peter Engström, and Eva Söderman. "The homeobox genes ATHB12 and ATHB7 encode potential regulators of growth in response to water deficit in Arabidopsis." <i>Plant molecular biology</i> 55.5 (2004): 663-677.                                         |
| Solyc02g093270.3 | 2.28           | caffeoyl-CoA O-methyltransferase-like       | CCOAOMT1  | Involved in the reinforcement of the plant cell wall; Involved in response to wounding or pathogen challenge by promoting the formation of cell wall-bound ferulic acid polymers                                        | <i>Increased production of polysaccharides; Reinforced cell wall; Increased response to wounding and pathogens</i>                                                                                                  | Do, Cao-Trung, et al. "Both caffeoyl Coenzyme A 3-O-methyltransferase 1 and caffeic acid O-methyltransferase 1 are involved in redundant functions for lignin, flavonoids and sinapoyl malate biosynthesis in Arabidopsis." <i>Planta</i> 226.5 (2007): 1117-1129.    |
| Solyc07g049370.2 | 2.26           | glucan endo-1,3-beta-glucosidase 12         | AT4G29360 | Involved in carbohydrate metabolic process, cell wall organization, and plant defense response                                                                                                                          | <i>Increased carbohydrate metabolism, cell wall organization, and plant defense response</i>                                                                                                                        | Wu, Qiong, et al. "Long-term balancing selection contributes to adaptation in Arabidopsis and its relatives." <i>Genome biology</i> 18.1 (2017): 1-15.                                                                                                                |
| Solyc09g064820.1 | 2.26           | EID1-like F-box protein 3                   | EDL3      | Involved in the following processes: ABA-activated signaling pathway, regulation of seed germination, response to osmotic stress, response to salt stress, response to water deprivation, and meristem phase transition | <i>Increased ABA-activated signaling; Increased regulation of seed germination; Promoted response to osmotic, salt, and water stress; Promoted transition from vegetative to reproductive phase in the meristem</i> | Friso, Giulia, et al. "In-depth analysis of the thylakoid membrane proteome of Arabidopsis thaliana chloroplasts: new proteins, new functions, and a plastid proteome database." <i>The Plant Cell</i> 16.2 (2004): 478-499.                                          |
| Solyc02g069110.3 | 2.24           | cathepsin B-like protease 2                 | CATHB2    | Thiol protease that plays a central role in plant programmed cell death; Required for full levels of PCD during resistance gene-mediated hypersensitive response                                                        | <i>Increased initiation of programmed cell death; Promoted hypersensitive response</i>                                                                                                                              | Theologis, Athanasios, et al. "Sequence and analysis of chromosome 1 of the plant Arabidopsis thaliana." <i>Nature</i> 408.6814 (2000): 816-820.                                                                                                                      |
| Solyc06g060690.2 | 2.22           | non-functional pseudokinase ZED1 isoform X1 | ZED1      | Involved in the regulation of the ambient temperature-sensitive intersection of growth and immune response                                                                                                              | <i>Repressed regulation of temperature-sensitive intersection of growth and immune response</i>                                                                                                                     | Lewis, Jennifer D., et al. "The Arabidopsis ZED1 pseudokinase is required for ZAR1-mediated immunity induced by the Pseudomonas syringae type III effector HopZ1a." <i>Proceedings of the National Academy of Sciences</i> 110.46 (2013): 18722-18727.                |
| Solyc01g006320.3 | 2.20           | protein NDR1-like                           | NRD1      | Required for disease resistance conferred by R genes recognizing bacterial and oomycete pathogens; Required for the establishment of hypersensitive response and SAR                                                    | <i>Promoted diseased resistance against bacterial and fungal pathogens; Promoted hypersensitive response; Promoted SAR</i>                                                                                          | Century, Karen S., Eric B. Holub, and Brian J. Staskawicz. "NDR1, a locus of Arabidopsis thaliana that is required for disease resistance to both a bacterial and a fungal pathogen." <i>Proceedings of the National Academy of Sciences</i> 92.14 (1995): 6597-6601. |
| Solyc12g094520.2 | 2.15           | 4-coumarate--CoA ligase-like 5              | 4CLL5     | Contributes to JA biosynthesis by initiating the beta-oxidative chain shortening of its precursors                                                                                                                      | <i>Increased production of phenylpropanoid-derived compounds; Increased JA biosynthesis</i>                                                                                                                         | Koo, Abraham JK, et al. "Identification of a peroxisomal acyl-activating enzyme involved in the biosynthesis of jasmonic acid in Arabidopsis." <i>Journal of Biological Chemistry</i> 281.44 (2006): 33511-33520.                                                     |

| TomatoID                | DE in Infected | NCBI Protein Name                                  | Gene ID   | Uniprot Description                                                                                                                                                                               | Putative Consequences for Infection                                                                                                                                                                    | Citation                                                                                                                                                                                                                            |
|-------------------------|----------------|----------------------------------------------------|-----------|---------------------------------------------------------------------------------------------------------------------------------------------------------------------------------------------------|--------------------------------------------------------------------------------------------------------------------------------------------------------------------------------------------------------|-------------------------------------------------------------------------------------------------------------------------------------------------------------------------------------------------------------------------------------|
| <i>Solyc02g082930.3</i> | 2.14           | acidic 27 kDa endochitinase precursor              | CHI17     | Involved in defense against chitin-containing fungal pathogens                                                                                                                                    | <i>Increased defense against fungal pathogens</i>                                                                                                                                                      | Danhash, Nadia, et al. "Molecular characterization of four chitinase cDNAs obtained from <i>Cladosporium fulvum</i> -infected tomato." <i>Plant molecular biology</i> 22.6 (1993): 1017-1029.                                       |
| <i>Solyc07g052510.4</i> | 2.13           | peroxidase 3 precursor                             | PER3      | Involved in removal of H <sub>2</sub> O <sub>2</sub> , oxidation of toxic reductants, biosynthesis and degradation of lignin, suberization, auxin catabolism, response to environmental stressors | <i>Increased removal of H<sub>2</sub>O<sub>2</sub>, oxidation of toxic reductants, biosynthesis and degradation of lignin, suberization, auxin catabolism, and response to environmental stressors</i> | Paynel, Florence, et al. "Temporal regulation of cell-wall pectin methylesterase and peroxidase isoforms in cadmium-treated flax hypocotyl." <i>Annals of botany</i> 104.7 (2009): 1363-1372.                                       |
| <i>Solyc07g064820.1</i> | 2.13           | mitogen-activated protein kinase kinase 18-like    | MAPKKK18  | Act as ABA signal transducer under abiotic stress; Promotes stomatal growth/development; Inhibits germination and root growth; Promotes leaf senescence                                           | <i>Increased response to stress; Increased reproductive development; Decreased growth/development; Increased leaf senescence</i>                                                                       | Mitula, Filip, et al. "Arabidopsis ABA-activated kinase MAPKKK18 is regulated by protein phosphatase 2C AB11 and the ubiquitin-proteasome pathway." <i>Plant and Cell Physiology</i> 56.12 (2015): 2351-2367.                       |
| <i>Solyc12g014420.2</i> | 2.12           | glucan endo-1,3-beta-glucosidase 13-like           | AT5G56590 | Involved in carbohydrate metabolic process, cell wall organization, and plant defense response                                                                                                    | <i>Increased carbohydrate metabolism, cell wall organization, and plant defense response</i>                                                                                                           | Wu, Qiong, et al. "Long-term balancing selection contributes to adaptation in <i>Arabidopsis</i> and its relatives." <i>Genome biology</i> 18.1 (2017): 1-15.                                                                       |
| <i>Solyc11g010390.1</i> | 2.11           | classical arabinogalactan protein 10-like          | AGP10     | Proteoglycan involved in differentiation, cell-cell recognition, embryogenesis, and programmed cell death                                                                                         | <i>Promoted plant growth/development and cell differentiation; Promoted programmed cell death</i>                                                                                                      | Thieme, Christoph J., et al. "Endogenous <i>Arabidopsis</i> messenger RNAs transported to distant tissues." <i>Nature Plants</i> 1.4 (2015): 1-9.                                                                                   |
| <i>Solyc01g099370.3</i> | 2.10           | protein SRC2 homolog                               | SRC2      | Acts as an activator of RBOHF, which mediates reactive oxygen species production; Plays a role in cold responses                                                                                  | <i>Increased response to reactive oxygen species; Promoted response to cold</i>                                                                                                                        | Kawarazaki, Tomoko, et al. "A low temperature-inducible protein AtSRC2 enhances the ROS-producing activity of NADPH oxidase AtRbohF." <i>Biochimica et Biophysica Acta (BBA)-Molecular Cell Research</i> 1833.12 (2013): 2775-2780. |
| <i>Solyc07g054220.1</i> | 2.10           | ethylene-responsive transcription factor ERF054    | ERF054    | Binds to the GCC-box pathogenesis-related promoter element; Regulates gene expression under stress                                                                                                | <i>Increased response to stress and pathogenesis</i>                                                                                                                                                   | Riechmann, José Luis, et al. "Arabidopsis transcription factors: genome-wide comparative analysis among eukaryotes." <i>Science</i> 290.5499 (2000): 2105-2110.                                                                     |
| <i>Solyc10g055780.1</i> | 2.10           | endochitinase 4                                    | N/A       | Involved in defense against chitin-containing fungal and bacterial pathogens                                                                                                                      | <i>Increased defense against chitin-containing pathogens</i>                                                                                                                                           | Herget, Thomas, Jeff Schell, and Peter H. Schreier. "Elicitor-specific induction of one member of the chitinase gene family in <i>Arachis hypogaea</i> ." <i>Molecular and General Genetics</i> MGG 224.3 (1990): 469-476.          |
| <i>Solyc01g079600.3</i> | 2.09           | phospholipase A1 PLIP2, chloroplastic isoform X1   | PLIP2     | Catalyzes the initial step of oxylipins and jasmonate biosynthesis; Links ABA-mediated abiotic stress responses and oxylipin and jasmonate signaling pathways                                     | <i>Increased jasmonate biosynthesis; Increased jasmonate signaling crosstalk</i>                                                                                                                       | Wang, Kun, et al. "Two abscisic acid-responsive plastid lipase genes involved in jasmonic acid biosynthesis in <i>Arabidopsis thaliana</i> ." <i>The Plant Cell</i> 30.5 (2018): 1006-1022.                                         |
| <i>Solyc04g051360.3</i> | 2.09           | ethylene-responsive transcription factor ABR1-like | ABR1      | Negative regulator of the ABA signaling pathway involved in seed germination and in responses to stress                                                                                           | <i>Increased ABA signaling; Increased response to stress and pathogenesis</i>                                                                                                                          | Pandey, Girdhar K., et al. "ABR1, an APETALA2-domain transcription factor that functions as a repressor of ABA response in <i>Arabidopsis</i> ." <i>Plant Physiology</i> 139.3 (2005): 1185-1193.                                   |

| TomatoID                | DE in Infected | NCBI Protein Name                           | Gene ID | Uniprot Description                                                                                                                                                                       | Putative Consequences for Infection                                                                              | Citation                                                                                                                                                                                                                                                                                       |
|-------------------------|----------------|---------------------------------------------|---------|-------------------------------------------------------------------------------------------------------------------------------------------------------------------------------------------|------------------------------------------------------------------------------------------------------------------|------------------------------------------------------------------------------------------------------------------------------------------------------------------------------------------------------------------------------------------------------------------------------------------------|
| <i>Solyc07g007870.3</i> | 2.06           | 12-oxophytodienoate reductase 3             | OPR3    | Involved in the biosynthesis of JA and other oxylipin signaling molecules; Required for the spatial and temporal regulation of JA levels during dehiscence of anthers                     | <i>Increased biosynthesis of JA and other oxylipin signaling molecules</i>                                       | Sanders, Paul M., et al. "The Arabidopsis DELAYED DEHISCENCE1 gene encodes an enzyme in the jasmonic acid synthesis pathway." <i>The Plant Cell</i> 12.7 (2000): 1041-1061.                                                                                                                    |
| <i>Solyc09g008280.2</i> | 2.04           | S-adenosylmethionine synthase 3             | METK3   | Catalyzes the formation of S-adenosylmethionine from methionine; Involved in SA-mediated defense; Involved in the biosynthesis of lignin                                                  | <i>Increased S-adenosylmethionine production; Promoted early defense response; Increased lignin biosynthesis</i> | Goto, Derek B., et al. "A single-nucleotide mutation in a gene encoding S-adenosylmethionine synthetase is associated with methionine over-accumulation phenotype in Arabidopsis thaliana." <i>Genes &amp; genetic systems</i> 77.2 (2002): 89-95.                                             |
| <i>Solyc09g089930.2</i> | 2.04           | ethylene responsive element binding protein | EREBP1  | Involved in defense response; Involved in ethylene-activated signaling pathway                                                                                                            | <i>Increased defense response; Increased ethylene-responsive signaling</i>                                       | Horvath, Diana M., Dorothy J. Huang, and Nam-Hai Chua. "Four classes of salicylate-induced tobacco genes." <i>Molecular plant-microbe interactions</i> 11.9 (1998): 895-905.                                                                                                                   |
| <i>Solyc01g102390.3</i> | 2.03           | germin-like protein 5-1                     | N/A     | Plays a role in plant defense                                                                                                                                                             | <i>Increased plant defense</i>                                                                                   | Kawahara, Yoshihiro, et al. "Improvement of the Oryza sativa Nipponbare reference genome using next generation sequence and optical map data." <i>Rice</i> 6.1 (2013): 4.                                                                                                                      |
| <i>Solyc07g008410.3</i> | 2.03           | protein DETOXIFICATION 29-like              | DTX29   | Xenobiotic transmembrane transporter activity                                                                                                                                             | <i>Increased detoxification</i>                                                                                  | Hanada, Kousuke, et al. "Functional compensation of primary and secondary metabolites by duplicate genes in Arabidopsis thaliana." <i>Molecular biology and evolution</i> 28.1 (2011): 377-382.                                                                                                |
| <i>Solyc02g082430.3</i> | 2.02           | MLO-like protein 8 isoform X2               | MLO8    | Involved in modulation of pathogen defense and leaf cell death                                                                                                                            | <i>Promoted programmed cell death; Increased defense against pathogens</i>                                       | Menges, Margit, et al. "Cell cycle-regulated gene expression in Arabidopsis." <i>Journal of Biological Chemistry</i> 277.44 (2002): 41987-42002.                                                                                                                                               |
| <i>Solyc03g112960.1</i> | 2.02           | pectinesterase 1                            | PME1    | Acts in the modification of cell walls; Acts as negative regulator of genes involved in salt stress response                                                                              | <i>Increased modification of plant cell walls; Impaired salt stress response</i>                                 | Creighton, Maria T., et al. "Methylation of protein phosphatase 2A—Influence of regulators and environmental stress factors." <i>Plant, cell &amp; environment</i> 40.10 (2017): 2347-2358.                                                                                                    |
| <i>Solyc04g072000.3</i> | 2.01           | endochitinase EP3                           | EP3     | Involved in hypersensitive reaction against specific pathogens                                                                                                                            | <i>Increased hypersensitive reaction against some pathogens</i>                                                  | Liliane, B. de A., et al. "Arabidopsis thaliana class IV chitinase is early induced during the interaction with Xanthomonas campestris." <i>Febs Letters</i> 419.1 (1997): 69-75.                                                                                                              |
| <i>Solyc11g010500.1</i> | 2.01           | mitochondrial uncoupling protein 5          | PUMP5   | Mitochondrial transporters that create proton leaks across the inner mitochondrial membrane; Involved in protecting plant cells against oxidative stress damage                           | <i>Increased defense against oxidative stress</i>                                                                | Borecký, Jiří, et al. "The plant energy-dissipating mitochondrial systems: depicting the genomic structure and the expression profiles of the gene families of uncoupling protein and alternative oxidase in monocots and dicots." <i>Journal of Experimental Botany</i> 57.4 (2006): 849-864. |
| <i>Solyc01g102640.2</i> | -2.00          | nuclear pore complex protein NUP98A-like    | NUP98A  | Structural constituent of nuclear pore; Necessary for mRNA transport from the nucleus and protein import into the nucleus; Required for photoperiodism; Required for constitutive defense | <i>Impaired mRNA transport; Impaired photoperiodism; Impaired constitutive defense</i>                           | "A putative nucleoporin 96 is required for both basal defense and constitutive resistance responses mediated by suppressor of npr1-1, constitutive 1."                                                                                                                                         |
| <i>Solyc01g094210.2</i> | -2.02          | (+)-neomenthol dehydrogenase                | SDR1    | Involved in basal resistance against pathogens                                                                                                                                            | <i>Impaired basal resistance against pathogens</i>                                                               | Choi, Hyong Woo, et al. "A role for a menthone reductase in resistance against microbial pathogens in plants." <i>Plant physiology</i> 148.1 (2008): 383-401.                                                                                                                                  |

| TomatoID                | DE in Infected | NCBI Protein Name                                          | Gene ID | Uniprot Description                                                                                                                                                                                       | Putative Consequences for Infection                                                                                                    | Citation                                                                                                                                                                                                                                         |
|-------------------------|----------------|------------------------------------------------------------|---------|-----------------------------------------------------------------------------------------------------------------------------------------------------------------------------------------------------------|----------------------------------------------------------------------------------------------------------------------------------------|--------------------------------------------------------------------------------------------------------------------------------------------------------------------------------------------------------------------------------------------------|
| <i>Solyc11g010270.2</i> | -2.05          | homeobox-leucine zipper protein ATHB-6                     | ATHB-6  | Acts as a growth regulator in response to water deficit; Involved in the negative regulation of the ABA signaling pathway                                                                                 | <i>Impaired response to drought; Impaired regulation of ABA signaling</i>                                                              | Himmelbach, Axel, et al. "Homeodomain protein ATHB6 is a target of the protein phosphatase ABI1 and regulates hormone responses in Arabidopsis." The EMBO Journal 21.12 (2002): 3029-3038.                                                       |
| <i>Solyc06g008760.1</i> | -2.06          | glutaredoxin-C13                                           | GRXC13  | Involved in regulation of plant defense responses                                                                                                                                                         | Decreased regulation of plant defense                                                                                                  | Brodersen, Peter, et al. "Arabidopsis MAP kinase 4 regulates salicylic acid-and jasmonic acid/ethylene-dependent responses via EDS1 and PAD4." The Plant Journal 47.4 (2006): 532-546.                                                           |
| <i>Solyc10g051120.2</i> | -2.06          | mitochondrial pyruvate carrier 1-like                      | MPC1    | Mediates the uptake of pyruvate into mitochondria                                                                                                                                                         | <i>Impaired drought response</i>                                                                                                       | Li, Chun-Long, et al. "NRGA1, a putative mitochondrial pyruvate carrier, mediates ABA regulation of guard cell ion channels and drought stress responses in Arabidopsis." Molecular plant 7.10 (2014): 1508-1521.                                |
| <i>Solyc03g025350.3</i> | -2.08          | silicon efflux transporter LSI2-like                       | LSI2    | Silicon efflux transporter involved in silicon transport from the root cells to the apoplast                                                                                                              | <i>Impaired cell wall response to abiotic and biotic stressors</i>                                                                     | Ma, Jian Feng, et al. "An efflux transporter of silicon in rice." Nature 448.7150 (2007): 209-212.                                                                                                                                               |
| <i>Solyc07g014620.1</i> | -2.11          | auxin-responsive protein SAUR50                            | SAUR50  | Effector of hormonal and environmental signals in plant growth                                                                                                                                            | <i>Impaired response to hormonal and environmental signaling; Impaired growth/development</i>                                          | Ren, Hong, and William M. Gray. "SAUR proteins as effectors of hormonal and environmental signals in plant growth." Molecular plant 8.8 (2015): 1153-1164.                                                                                       |
| <i>Solyc07g056280.3</i> | -2.11          | WRKY transcription factor 30                               | WRKY30  | Transcription factor involved in leaf senescence, response to hydrogen peroxide, response to ozone, and SA signaling pathway                                                                              | <i>Impaired leaf senescence; Impaired response to hydrogen peroxide; Impaired response to ozone; Impaired response to SA signaling</i> | El-Esawi, Mohamed A., et al. "Overexpression of AtWRKY30 transcription factor enhances heat and drought stress tolerance in wheat ( <i>Triticum aestivum</i> L.)." Genes 10.2 (2019): 163.                                                       |
| <i>Solyc06g074800.1</i> | -2.14          | zinc finger protein ZAT5-like                              | ZAT5    | Transcription factor involved in stress responses                                                                                                                                                         | <i>Impaired response to stressors</i>                                                                                                  | Mittler, Ron, et al. "Gain- and loss-of-function mutations in Zat10 enhance the tolerance of plants to abiotic stress." FEBS letters 580.28-29 (2006): 6537-6542.                                                                                |
| <i>Solyc07g014680.3</i> | -2.18          | Na <sup>+</sup> transporter HKT1,1                         | HKT1    | Plays a central role in plant tolerance to salt; Involved in Na <sup>+</sup> recirculation from shoots to roots by mediating Na <sup>+</sup> loading into the phloem sap in shoots and unloading in roots | <i>Impaired salt tolerance</i>                                                                                                         | Uozumi, Nobuyuki, et al. "The Arabidopsis HKT1 gene homolog mediates inward Na <sup>+</sup> currents in <i>Xenopus laevis</i> oocytes and Na <sup>+</sup> uptake in <i>Saccharomyces cerevisiae</i> ." Plant physiology 122.4 (2000): 1249-1260. |
| <i>Solyc08g075880.3</i> | -2.32          | heavy metal-associated isoprenylated plant protein 30-like | HIPP30  | Involved in metal ion transport; Involved in response to drought stress                                                                                                                                   | <i>Impaired metal ion transport; Impaired response to drought stress</i>                                                               | "Stress induced and nuclear localized HIPP26 from Arabidopsis thaliana interacts via its heavy metal associated domain with the drought stress related zinc finger transcription factor ATHB29."                                                 |
| <i>Solyc07g005210.3</i> | -2.33          | temperature-induced lipocalin-1                            | TIL     | Involved in basal and acquired thermotolerance; Lipocalin that confers protection against oxidative stress caused by heat, hypersalinity, freezing, paraquat, and light                                   | <i>Impaired thermotolerance; Impaired tolerance to salt stress, freezing, paraquat, and light</i>                                      | Abo-Ogiala, Atef, et al. "Temperature-induced lipocalin (TIL) is translocated under salt stress and protects chloroplasts from ion toxicity." Journal of plant physiology 171.3-4 (2014): 250-259.                                               |

| TomatoID                | DE in Infected | NCBI Protein Name                                             | Gene ID   | Uniprot Description                                                                                                                   | Putative Consequences for Infection                                                           | Citation                                                                                                                                                                                        |
|-------------------------|----------------|---------------------------------------------------------------|-----------|---------------------------------------------------------------------------------------------------------------------------------------|-----------------------------------------------------------------------------------------------|-------------------------------------------------------------------------------------------------------------------------------------------------------------------------------------------------|
| <i>Solyc11g008530.2</i> | -2.48          | endoribonuclease Dicer 2d isoform X1                          | AT3G03300 | Plays an essential role in transitive silencing of transgenes by processing secondary siRNAs; Plays a role in antiviral RNA silencing | <i>Impaired post-transcriptional gene silencing; Impaired defense against viral pathogens</i> | "DICER-LIKE2 plays a primary role in transitive silencing of transgenes in Arabidopsis."                                                                                                        |
| <i>Solyc04g011670.3</i> | -2.64          | TGACG-sequence-specific DNA-binding protein TGA-1A isoform X2 | TGA1A     | Promotes auxin- and SA-inducible transcription                                                                                        | <i>Impaired auxin- and SA-inducible transcription</i>                                         | Pascuzzi, Pete, et al. "Auxin-induced stress potentiates trans-activation by a conserved plant basic/leucine-zipper factor." <i>Journal of Biological Chemistry</i> 273.41 (1998): 26631-26637. |
| <i>Solyc11g069940.1</i> | -2.87          | glutaredoxin-C6                                               | GRXC6     | Involved in regulation of plant defense responses                                                                                     | <i>Impaired regulation of plant defense</i>                                                   | Brodersen, Peter, et al. "Arabidopsis MAP kinase 4 regulates salicylic acid-and jasmonic acid/ethylene-dependent responses via EDS1 and PAD4." <i>The Plant Journal</i> 47.4 (2006): 532-546.   |
| <i>Solyc09g008200.3</i> | -2.95          | heavy metal-associated isoprenylated plant protein 5          | HIPP05    | Heavy-metal-binding protein involved in metal ion transport; Involved in disease resistance                                           | <i>Impaired metal ion transport; Impaired disease resistance</i>                              | Cooper, Bret, et al. "A network of rice genes associated with stress response and seed development." <i>Proceedings of the National Academy of Sciences</i> 100.8 (2003): 4945-4950.            |
