# Supplementary material for: Effects of ‘Candidatus Liberibacter solanacearum’ haplotypes A and B on tomato gene expression and geotropism
Source: PubMed Central journal article supplement (PMC8966271; doi:10.1186/s12870-022-03505-z), 2022-03-30
Supplement: 12870_2022_3505_MOESM7_ESM.pdf [file 12870_2022_3505_MOESM7_ESM.pdf]

| TomatoID                | DE in Infected | NCBI Protein Name                                                  | Gene ID   | Uniprot Description                                                                                                                         | Putative Consequences for Infection                                                                        | Citation                                                                                                                                                                                                                                     |
|-------------------------|----------------|--------------------------------------------------------------------|-----------|---------------------------------------------------------------------------------------------------------------------------------------------|------------------------------------------------------------------------------------------------------------|----------------------------------------------------------------------------------------------------------------------------------------------------------------------------------------------------------------------------------------------|
| <i>Solyc12g010020.2</i> | 9.14           | leucine aminopeptidase 1, chloroplastic                            | LAPA1     | Involved in the processing and regular turnover of intracellular proteins                                                                   | <i>Increased intracellular protein turnover</i>                                                            | Pautot, Veronique, et al. "Leucine aminopeptidase: an inducible component of the defense response in <i>Lycopersicon esculentum</i> (tomato)." <i>Proceedings of the National Academy of Sciences</i> 90.21 (1993): 9906-9910.               |
| <i>Solyc00g187050.3</i> | 8.79           | leucine aminopeptidase 1, chloroplastic                            | LAPA1     | Involved in the processing and regular turnover of intracellular proteins                                                                   | <i>Increased intracellular protein turnover</i>                                                            | Pautot, Veronique, et al. "Leucine aminopeptidase: an inducible component of the defense response in <i>Lycopersicon esculentum</i> (tomato)." <i>Proceedings of the National Academy of Sciences</i> 90.21 (1993): 9906-9910.               |
| <i>Solyc12g010030.2</i> | 8.64           | leucine aminopeptidase 2, chloroplastic isoform X1                 | LAP2      | Involved in the processing and regular turnover of intracellular proteins; Heat shock protein                                               | <i>Increased turnover of intracellular proteins; Increased protection from heat-induced damaged</i>        | Waditee-Sirisattha, Rungaroon, et al. "The Arabidopsis aminopeptidase LAP2 regulates plant growth, leaf longevity and stress response." <i>New Phytologist</i> 191.4 (2011): 958-969.                                                        |
| <i>Solyc06g062370.3</i> | 7.18           | Glucose-1-phosphate adenyltransferase small subunit, chloroplastic | APS1      | Plays a role in starch synthesis; Catalyzes the synthesis of the activated glycosyl donor, ADP-glucose from Glc-1-P, and ATP                | <i>Increased starch synthesis</i>                                                                          | Tanaka, Hiroshi, et al. "Isolation and some properties of acid phosphatase-11 from tomato leaves." <i>Agricultural and biological chemistry</i> 54.8 (1990): 1947-1952.                                                                      |
| <i>Solyc12g096780.2</i> | 6.48           | enoyl-[acyl-carrier-protein] reductase, mitochondrial-like         | AT3G45770 | Catalyzes the NADPH-dependent reduction of trans-2-enoyl thioesters in mitochondrial fatty acid synthesis                                   | <i>Increased fatty acid synthesis and metabolism</i>                                                       | Li-Beisson, Yonghua, et al. "Acyl-lipid metabolism." <i>The Arabidopsis book/American Society of Plant Biologists</i> 11 (2013).                                                                                                             |
| <i>Solyc01g091170.3</i> | 6.10           | Arginase 2, chloroplastic/mitochondrial                            | ARGAH2    | Utilized in the urea cycle; Precursor for the synthesis of both polyamines and proline; Catalyzes the formation of putrescine from agmatine | <i>Promoted jasmonate-related functions; Increased urea waste management; Increased freezing tolerance</i> | Dombrecht, Bruno, et al. "MYC2 differentially modulates diverse jasmonate-dependent functions in Arabidopsis." <i>The Plant Cell</i> 19.7 (2007): 2225-2245.                                                                                 |
| <i>Solyc12g010980.2</i> | 5.65           | acetyl-CoA-benzylalcohol acetyltransferase                         | BEAT      | Involved in the biosynthesis of benzyl acetate, a major constituent of the floral scent                                                     | <i>Increased synthesis of benzyl acetate</i>                                                               | Dudareva, Natalia, et al. "Acetyl-CoA: benzylalcohol acetyltransferase—an enzyme involved in floral scent production in <i>Clarkia breweri</i> ." <i>The Plant Journal</i> 14.3 (1998): 297-304.                                             |
| <i>Solyc10g005320.3</i> | 4.70           | tryptophan synthase beta chain 1-like                              | TSB1      | The beta subunit is responsible for the synthesis of L-tryptophan from indole and L-serine                                                  | <i>Increased synthesis of L-tryptophan from indole and L-serine</i>                                        | Ouyang, Jian, Xiang Shao, and Jiayang Li. "Indole-3-glycerol phosphate, a branchpoint of indole-3-acetic acid biosynthesis from the tryptophan biosynthetic pathway in Arabidopsis thaliana." <i>The Plant Journal</i> 24.3 (2000): 327-334. |
| <i>Solyc12g096770.1</i> | 4.69           | acetyl-CoA-benzylalcohol acetyltransferase-like                    | BEAT      | Involved in the biosynthesis of benzyl acetate, a major constituent of the floral scent                                                     | <i>Increased synthesis of benzyl acetate</i>                                                               | Dudareva, Natalia, et al. "Acetyl-CoA: benzylalcohol acetyltransferase—an enzyme involved in floral scent production in <i>Clarkia breweri</i> ." <i>The Plant Journal</i> 14.3 (1998): 297-304.                                             |
| <i>Solyc09g010980.1</i> | 4.49           | laccase-17                                                         | LAC17     | Involved in lignin degradation and detoxification of lignin-derived products                                                                | <i>Increased lignin degradation and detoxification of lignin-derived products</i>                          | Sibout, Richard, et al. "CINNAMYL ALCOHOL DEHYDROGENASE-C and -D are the primary genes involved in lignin biosynthesis in the floral stem of Arabidopsis." <i>The Plant Cell</i> 17.7 (2005): 2059-2076.                                     |

| TomatoID                | DE in Infected | NCBI Protein Name                                                  | Gene ID   | Uniprot Description                                                                                                                                                                                                          | Putative Consequences for Infection                                                                                                                                      | Citation                                                                                                                                                                                                                                                             |
|-------------------------|----------------|--------------------------------------------------------------------|-----------|------------------------------------------------------------------------------------------------------------------------------------------------------------------------------------------------------------------------------|--------------------------------------------------------------------------------------------------------------------------------------------------------------------------|----------------------------------------------------------------------------------------------------------------------------------------------------------------------------------------------------------------------------------------------------------------------|
| <i>Solyc07g056000.2</i> | 4.25           | xyloglycan endo-transglycosylase precursor                         | XET1      | Involved in carbohydrate metabolic process                                                                                                                                                                                   | <i>Increased carbohydrate metabolism</i>                                                                                                                                 | Tucker, Mark L., et al. "Gene expression profiles for cell wall-modifying proteins associated with soybean cyst nematode infection, petiole abscission, root tips, flowers, apical buds, and leaves." <i>Journal of Experimental Botany</i> 58.12 (2007): 3395-3406. |
| <i>Solyc10g086500.1</i> | 3.78           | steroid 5-alpha-reductase DET2                                     | DET2      | Involved in a reduction step in the biosynthesis of the plant steroid, brassinolide                                                                                                                                          | <i>Increased brassinolide biosynthesis; Promoted cell elongation</i>                                                                                                     | Fujioka, Shozo, et al. "The Arabidopsis deetiolated2 mutant is blocked early in brassinosteroid biosynthesis." <i>The Plant Cell</i> 9.11 (1997): 1951-1962.                                                                                                         |
| <i>Solyc11g018800.2</i> | 3.77           | lignin-forming anionic peroxidase                                  | N/A       | Involved in removal of H2O2, oxidation of toxic reductants, biosynthesis and degradation of lignin, suberization, auxin catabolism, and response to biotic stressors                                                         | <i>Increased response to oxidative stress; Increased auxin catabolism; Increased defense against wounding and pathogen attack</i>                                        | Lagrimini, L. Mark, et al. "Molecular cloning of complementary DNA encoding the lignin-forming peroxidase from tobacco: molecular analysis and tissue-specific expression." <i>Proceedings of the National Academy of Sciences</i> 84.21 (1987): 7542-7546.          |
| <i>Solyc12g057060.2</i> | 3.74           | 7-deoxyloganetin glucosyltransferase-like                          | N/A       | Iridoid glucosyltransferase acting exclusively on 7-deoxyloganetin; Involved in the synthesis of secologanin                                                                                                                 | <i>Increased synthesis of secologanin</i>                                                                                                                                | Asada, Keisuke, et al. "A 7-deoxyloganic acid glucosyltransferase contributes a key step in secologanin biosynthesis in Madagascar periwinkle." <i>The Plant Cell</i> 25.10 (2013): 4123-4134.                                                                       |
| <i>Solyc08g068600.3</i> | 3.68           | aromatic amino acid decarboxylase 1B                               | AADC1B    | Involved in carboxylic acid metabolic process                                                                                                                                                                                | <i>Increased carboxylic acid metabolism</i>                                                                                                                              | Tieman, Denise, et al. "Tomato aromatic amino acid decarboxylases participate in synthesis of the flavor volatiles 2-phenylethanol and 2-phenylacetaldehyde." <i>Proceedings of the National Academy of Sciences</i> 103.21 (2006): 8287-8292.                       |
| <i>Solyc10g076660.2</i> | 3.54           | probable 2-oxoglutarate-dependent dioxygenase At5g05600 isoform X1 | AT5G05600 | Involved in anthocyanin and protoanthocyanidin biosynthesis                                                                                                                                                                  | <i>Increased anthocyanin and protoanthocyanidin biosynthesis</i>                                                                                                         | Wang, Yi, et al. "Transcriptome analyses show changes in gene expression to accompany pollen germination and tube growth in Arabidopsis." <i>Plant physiology</i> 148.3 (2008): 1201-1211.                                                                           |
| <i>Solyc10g009270.3</i> | 3.50           | transcription factor MYC2-like                                     | MYC2      | Involved in the regulation of ABA-inducible genes under drought stress; Negative regulator of light-regulated gene expression and growth; Positive regulator of lateral root formation; Regulates sesquiterpene biosynthesis | <i>Promoted response to drought; Impaired response to light-mediated expression; Promoted lateral root formation; Increased regulation of sesquiterpene biosynthesis</i> | Abe, Hiroshi, et al. "Role of Arabidopsis MYC and MYB homologs in drought- and abscisic acid-regulated gene expression." <i>The Plant Cell</i> 9.10 (1997): 1859-1868.                                                                                               |
| <i>Solyc09g011860.3</i> | 3.44           | O-fucosyltransferase 19-like                                       | OFUT19    | Involved in Glycan metabolism                                                                                                                                                                                                | <i>Increased Glycan metabolism</i>                                                                                                                                       | Culligan, Kevin M., et al. "ATR and ATM play both distinct and additive roles in response to ionizing radiation." <i>The Plant Journal</i> 48.6 (2006): 947-961.                                                                                                     |
| <i>Solyc10g005480.3</i> | 3.38           | F-box protein SKIP27                                               | SKIP27    | Component of SCF(ASK-cullin-F-box) E3 ubiquitin ligase complexes, which mediate the ubiquitination and subsequent proteasomal degradation of target proteins                                                                 | <i>Increased proteasomal degradation</i>                                                                                                                                 | Risseuw, Eddy P., et al. "Protein interaction analysis of SCF ubiquitin E3 ligase subunits from Arabidopsis." <i>The Plant Journal</i> 34.6 (2003): 753-767.                                                                                                         |

| TomatoID                | DE in Infected | NCBI Protein Name                                                  | Gene ID   | Uniprot Description                                                                                                                                                                 | Putative Consequences for Infection                                                                                               | Citation                                                                                                                                                                                                                                                 |
|-------------------------|----------------|--------------------------------------------------------------------|-----------|-------------------------------------------------------------------------------------------------------------------------------------------------------------------------------------|-----------------------------------------------------------------------------------------------------------------------------------|----------------------------------------------------------------------------------------------------------------------------------------------------------------------------------------------------------------------------------------------------------|
| <i>Solyc10g084320.2</i> | 3.34           | subtilisin-like protease SBT1.9                                    | SBT1.9    | Involved in proteolysis                                                                                                                                                             | <i>Increased proteolysis</i>                                                                                                      | Barrero, José María, et al. "INCURVATA2 encodes the catalytic subunit of DNA polymerase $\alpha$ and interacts with genes involved in chromatin-mediated cellular memory in <i>Arabidopsis thaliana</i> ." <i>The Plant Cell</i> 19.9 (2007): 2822-2838. |
| <i>Solyc03g096050.3</i> | 3.30           | probable 2-oxoglutarate-dependent dioxygenase At5g05600            | AT5G05600 | Involved in anthocyanin and protoanthocyanidin biosynthesis                                                                                                                         | <i>Increased anthocyanin and protoanthocyanidin biosynthesis</i>                                                                  | Wang, Yi, et al. "Transcriptome analyses show changes in gene expression to accompany pollen germination and tube growth in <i>Arabidopsis</i> ." <i>Plant physiology</i> 148.3 (2008): 1201-1211.                                                       |
| <i>Solyc02g077330.3</i> | 3.29           | GDSL-like lipase/acylhydrolase superfamily protein precursor       | AT1G20132 | Lipid metabolic process                                                                                                                                                             | <i>Increased lipid catabolism</i>                                                                                                 | Cheng, Chia-Yi, et al. "Araport11: a complete reannotation of the <i>Arabidopsis thaliana</i> reference genome." <i>The Plant Journal</i> 89.4 (2017): 789-804.                                                                                          |
| <i>Solyc08g068610.3</i> | 3.29           | aromatic amino acid decarboxylase 1B                               | AADC1B    | Involved in carboxylic acid metabolic process                                                                                                                                       | <i>Increased carboxylic acid metabolism</i>                                                                                       | Tieman, Denise, et al. "Tomato aromatic amino acid decarboxylases participate in synthesis of the flavor volatiles 2-phenylethanol and 2-phenylacetaldehyde." <i>Proceedings of the National Academy of Sciences</i> 103.21 (2006): 8287-8292.           |
| <i>Solyc06g074530.1</i> | 3.07           | arogenate dehydratase/prephenate dehydratase 6, chloroplastic-like | ADT6      | Converts the prephenate produced from the shikimate-chorismate pathway into phenylalanine                                                                                           | <i>Increased phenylalanine production; Increased production of primary and secondary metabolites</i>                              | Cho, Man-Ho, et al. "Phenylalanine biosynthesis in <i>Arabidopsis thaliana</i> identification and characterization of Arogenate dehydratases." <i>Journal of Biological Chemistry</i> 282.42 (2007): 30827-30835.                                        |
| <i>Solyc12g005450.1</i> | 3.07           | probable receptor-like protein kinase At4g10390                    | AT4G10390 | Involved in protein phosphorylation; Involved in response to wounding                                                                                                               | <i>Increased protein phosphorylation; Promoted response to wounding</i>                                                           | Peng, Mingsheng, et al. "Genome-wide analysis of <i>Arabidopsis</i> responsive transcriptome to nitrogen limitation and its regulation by the ubiquitin ligase gene NLA." <i>Plant molecular biology</i> 65.6 (2007): 775-797.                           |
| <i>Solyc07g048060.2</i> | 3.06           | cytochrome b561 and DOMON domain-containing protein At5g48750      | AT5G48750 | Involved in oxidation-reduction process                                                                                                                                             | <i>Improved oxidation-reduction</i>                                                                                               | Kotani, Hirokazu, et al. "Structural analysis of <i>Arabidopsis thaliana</i> chromosome 5. VI. Sequence features of the regions of 1,367,185 bp covered by 19 physically assigned P1 and TAC clones." <i>DNA Research</i> 5.3 (1998): 203-216.           |
| <i>Solyc03g119980.3</i> | 3.03           | caffeoylshikimate esterase                                         | CSE       | Involved in the biosynthesis of lignin; Promotes the degradation of lysophosphatidylcholine and detoxifies the peroxidized membrane in response to cadmium-induced oxidative stress | <i>Increased biosynthesis of lignin; Increased detoxification of peroxidized membrane; Increased response to oxidative stress</i> | Gao, Wei, et al. "Acyl-CoA-binding protein 2 binds lysophospholipase 2 and lysoPC to promote tolerance to cadmium-induced oxidative stress in transgenic <i>Arabidopsis</i> ." <i>The Plant Journal</i> 62.6 (2010): 989-1003.                           |
| <i>Solyc01g090180.3</i> | 3.02           | 4,5-DOPA dioxygenase extradiol                                     | DODA      | Opens the cyclic ring of dihydroxy-phenylalanine, producing betalamic acid                                                                                                          | <i>Increased betalamic acid production; Increased pigment production</i>                                                          | Christinet, Laurent, et al. "Characterization and functional identification of a novel plant 4, 5-extradiol dioxygenase involved in betalain pigment biosynthesis in <i>Portulaca grandiflora</i> ." <i>Plant Physiology</i> 134.1 (2004): 265-274.      |

| TomatoID                | DE in Infected | NCBI Protein Name                                       | Gene ID   | Uniprot Description                                                                                                                                                     | Putative Consequences for Infection                                                                                   | Citation                                                                                                                                                                                                                                                                          |
|-------------------------|----------------|---------------------------------------------------------|-----------|-------------------------------------------------------------------------------------------------------------------------------------------------------------------------|-----------------------------------------------------------------------------------------------------------------------|-----------------------------------------------------------------------------------------------------------------------------------------------------------------------------------------------------------------------------------------------------------------------------------|
| <i>Solyc08g006740.3</i> | 2.98           | aromatic amino acid decarboxylase 2                     | AADC2     | Involved in carboxylic acid metabolic process                                                                                                                           | <i>Increased carboxylic acid metabolism</i>                                                                           | Tieman, Denise, et al. "Tomato aromatic amino acid decarboxylases participate in synthesis of the flavor volatiles 2-phenylethanol and 2-phenylacetaldehyde." <i>Proceedings of the National Academy of Sciences</i> 103.21 (2006): 8287-8292.                                    |
| <i>Solyc10g076240.2</i> | 2.86           | cationic peroxidase 1                                   | PNC1      | Involved in removal of H2O2, oxidation of toxic reductants, biosynthesis/degradation of lignin, suberization, auxin catabolism, and response to environmental stressors | <i>Promoted response to oxidative stress and other environmental stressors; Increased lignin and auxin metabolism</i> | Buffard, Dominique, et al. "Molecular cloning of complementary DNAs encoding two cationic peroxidases from cultivated peanut cells." <i>Proceedings of the National Academy of Sciences</i> 87.22 (1990): 8874-8878.                                                              |
| <i>Solyc10g085190.2</i> | 2.82           | probable 2-oxoglutarate-dependent dioxygenase At3g11180 | AT3G11180 | Involved in anthocyanin and protoanthocyanidin biosynthesis by catalyzing the oxidation of leucoanthocyanidins into anthocyanidins                                      | <i>Increased anthocyanin and protoanthocyanidin biosynthesis</i>                                                      | Wang, Yi, et al. "Transcriptome analyses show changes in gene expression to accompany pollen germination and tube growth in Arabidopsis." <i>Plant physiology</i> 148.3 (2008): 1201-1211.                                                                                        |
| <i>Solyc03g117600.3</i> | 2.81           | shikimate O-hydroxycinnamoyltransferase                 | HST       | Acytransferase involved in the biosynthesis of lignin                                                                                                                   | <i>Increased biosynthesis of lignin</i>                                                                               | Hoffmann, Laurent, et al. "Silencing of hydroxycinnamoyl-coenzyme A shikimate/quininate hydroxycinnamoyltransferase affects phenylpropanoid biosynthesis." <i>The Plant Cell</i> 16.6 (2004): 1446-1465.                                                                          |
| <i>Solyc09g091600.3</i> | 2.77           | protein SULFUR DEFICIENCY-INDUCED 2                     | AT1G04770 | Involved in the utilization of stored sulfate under sulfur-deficient conditions                                                                                         | <i>Increased storage of sulfate; Increased response to sulfur deficiency</i>                                          | Hanada, Kousuke, et al. "Functional compensation of primary and secondary metabolites by duplicate genes in Arabidopsis thaliana." <i>Molecular biology and evolution</i> 28.1 (2011): 377-382.                                                                                   |
| <i>Solyc03g093610.1</i> | 2.77           | ethylene response factor A.2                            | ERF2      | Involved in defense response; Involved in intracellular signal transduction; Involved in lipid metabolism                                                               | <i>Increased defense response; Increased intracellular signal transduction; Increased lipid metabolism</i>            | Zhang, Zhijun, et al. "Transcriptional regulation of the ethylene response factor LeERF2 in the expression of ethylene biosynthesis genes controls ethylene production in tomato and tobacco." <i>Plant Physiology</i> 150.1 (2009): 365-377.                                     |
| <i>Solyc06g083440.3</i> | 2.73           | cytochrome b5-like                                      | CB5LP     | Electron transfer activity; Heme binding; Metal ion binding                                                                                                             | <i>Impaired methionine catabolism</i>                                                                                 | Rébeillé, Fabrice, et al. "Methionine catabolism in Arabidopsis cells is initiated by a $\gamma$ -cleavage process and leads to S-methylcysteine and isoleucine syntheses." <i>Proceedings of the National Academy of Sciences</i> 103.42 (2006): 15687-15692.                    |
| <i>Solyc01g098910.3</i> | 2.71           | peroxisomal adenine nucleotide carrier 1                | PNC1      | Required for the conversion of seed-reserved triacylglycerols into sucrose; Necessary for growth before the onset of photosynthesis                                     | <i>Increased conversion of seed-reserved triacylglycerols; Promoted growth over storage</i>                           | Arai, Yuko, Makoto Hayashi, and Mikio Nishimura. "Proteomic identification and characterization of a novel peroxisomal adenine nucleotide transporter supplying ATP for fatty acid $\beta$ -oxidation in soybean and Arabidopsis." <i>The Plant Cell</i> 20.12 (2008): 3227-3240. |
| <i>Solyc12g099000.2</i> | 2.62           | S-adenosylmethionine synthase 2                         | SAM2      | Involved in SA-mediated defense                                                                                                                                         | <i>Increased S-adenosylmethionine production; Promoted early defense response</i>                                     | Rajjou, Loic, et al. "Proteomic investigation of the effect of salicylic acid on Arabidopsis seed germination and establishment of early defense mechanisms." <i>Plant physiology</i> 141.3 (2006): 910-923.                                                                      |
| <i>Solyc02g071610.3</i> | 2.60           | GDSL esterase/lipase At5g45670                          | AT5G45670 | Involved in lipid catabolism                                                                                                                                            | <i>Increased lipid catabolism</i>                                                                                     | Rouhier, Nicolas, et al. "Identification of plant glutaredoxin targets." <i>Antioxidants &amp; redox signaling</i> 7.7-8 (2005): 919-929.                                                                                                                                         |

| TomatoID         | DE in Infected | NCBI Protein Name                                          | Gene ID   | Uniprot Description                                                                                                                                                               | Putative Consequences for Infection                                                                                            | Citation                                                                                                                                                                                                                                                                               |
|------------------|----------------|------------------------------------------------------------|-----------|-----------------------------------------------------------------------------------------------------------------------------------------------------------------------------------|--------------------------------------------------------------------------------------------------------------------------------|----------------------------------------------------------------------------------------------------------------------------------------------------------------------------------------------------------------------------------------------------------------------------------------|
| Solyc04g082030.1 | 2.60           | ornithine decarboxylase                                    | ODC       | Catalyzes the first and rate-limiting step of polyamine biosynthesis that converts ornithine into putrescine, which is the precursor for the polyamines, spermidine, and spermine | <i>Increased production of polyamines, spermidine, and spermine</i>                                                            | Alabadi, David, and Juan Carbonell. "Expression of ornithine decarboxylase is transiently increased by pollination, 2, 4-dichlorophenoxyacetic acid, and gibberellic acid in tomato ovaries." <i>Plant physiology</i> 118.1 (1998): 323-328.                                           |
| Solyc04g011790.1 | 2.57           | monothiol glutaredoxin-S1-like                             | GRXS1     | Reduces GSH-thiol disulfides                                                                                                                                                      | <i>Increased reduction of GSH-thiol disulfides</i>                                                                             | Patterson, Kurt, et al. "Nitrate-regulated glutaredoxins control Arabidopsis primary root growth." <i>Plant Physiology</i> 170.2 (2016): 989-999.                                                                                                                                      |
| Solyc10g083970.1 | 2.57           | S-adenosylmethionine synthase 3-like                       | METK3     | Catalyzes the formation of S-adenosylmethionine from methionine; Involved in SA-mediated defense; Involved in the biosynthesis of lignin                                          | <i>Increased S-adenosylmethionine production; Promoted early defense response; Increased lignin biosynthesis</i>               | Goto, Derek B., et al. "A single-nucleotide mutation in a gene encoding S-adenosylmethionine synthetase is associated with methionine over-accumulation phenotype in Arabidopsis thaliana." <i>Genes &amp; genetic systems</i> 77.2 (2002): 89-95.                                     |
| Solyc07g008380.2 | 2.54           | salutaridinol 7-O-acetyltransferase-like                   | SALAT     | Involved in biosynthesis of morphinan-type benzyloisoquinoline alkaloids                                                                                                          | <i>Increased in biosynthesis of morphinan-type benzyloisoquinoline alkaloids</i>                                               | Lenz, Rainer, and Meinhart H. Zenk. "Acetyl coenzyme A: salutaridinol-7-O-acetyltransferase from Papaver somniferum plant cell cultures: The enzyme catalyzing the formation of thebaine in morphine biosynthesis." <i>Journal of Biological Chemistry</i> 270.52 (1995): 31091-31096. |
| Solyc10g086690.2 | 2.53           | phosphatidylinositol:ceramide inositolphosphotransferase 2 | IPCS2     | Essential for sphingolipid biosynthesis; Plays an important role in modulating plant programmed cell death                                                                        | <i>Increased sphingolipid biosynthesis; Promoted programmed cell death</i>                                                     | Wang, Wenming, et al. "An inositolphosphorylceramide synthase is involved in regulation of plant programmed cell death associated with defense in Arabidopsis." <i>The Plant Cell</i> 20.11 (2008): 3163-3179.                                                                         |
| Solyc05g008370.1 | 2.52           | probable ribose-5-phosphate isomerase 2                    | RPI2      | Involved in programmed cell death; Involved in vegetative-to-reproductive phase transition in meristems                                                                           | <i>Increased primary metabolism; Promoted programmed cell death; Promoted transition from vegetative-to-reproductive phase</i> | Xiong, Yuqing, et al. "Deficiency in a cytosolic ribose-5-phosphate isomerase causes chloroplast dysfunction, late flowering and premature cell death in Arabidopsis." <i>Physiologia plantarum</i> 137.3 (2009): 249-263.                                                             |
| Solyc03g031620.3 | 2.50           | 5'-adenylsulfate reductase 3, chloroplastic-like           | APR3      | Reduces sulfate for Cys biosynthesis                                                                                                                                              | <i>Increased Cys biosynthesis</i>                                                                                              | Tsakraklides, George, et al. "Sulfate reduction is increased in transgenic Arabidopsis thaliana expressing 5'-adenylsulfate reductase from Pseudomonas aeruginosa." <i>The Plant Journal</i> 32.6 (2002): 879-889.                                                                     |
| Solyc08g068680.3 | 2.48           | aromatic amino acid decarboxylase 1A                       | AADC1A    | Involved in carboxylic acid metabolic process                                                                                                                                     | <i>Increased carboxylic acid metabolism</i>                                                                                    | Tieman, Denise, et al. "Tomato aromatic amino acid decarboxylases participate in synthesis of the flavor volatiles 2-phenylethanol and 2-phenylacetaldehyde." <i>Proceedings of the National Academy of Sciences</i> 103.21 (2006): 8287-8292.                                         |
| Solyc02g032860.3 | 2.47           | 5'-adenylsulfate reductase 3, chloroplastic                | APR3      | Reduces sulfate for Cys biosynthesis                                                                                                                                              | <i>Increased Cys biosynthesis</i>                                                                                              | Tsakraklides, George, et al. "Sulfate reduction is increased in transgenic Arabidopsis thaliana expressing 5'-adenylsulfate reductase from Pseudomonas aeruginosa." <i>The Plant Journal</i> 32.6 (2002): 879-889.                                                                     |
| Solyc02g077110.3 | 2.45           | phospholipase A1-II 1-like                                 | Osl_03083 | Acylyhydrolase that catalyzes the hydrolysis of phospholipids at the sn-1 position; Involved in lipid catabolism                                                                  | <i>Increased lipid catabolism</i>                                                                                              | Yu, Jun, et al. "The genomes of Oryza sativa: a history of duplications." <i>PLoS Biol</i> 3.2 (2005): e38.                                                                                                                                                                            |

| TomatoID                | DE in Infected | NCBI Protein Name                                     | Gene ID   | Uniprot Description                                                                                                                                                                                   | Putative Consequences for Infection                                                                                                                                                                    | Citation                                                                                                                                                                                                                                |
|-------------------------|----------------|-------------------------------------------------------|-----------|-------------------------------------------------------------------------------------------------------------------------------------------------------------------------------------------------------|--------------------------------------------------------------------------------------------------------------------------------------------------------------------------------------------------------|-----------------------------------------------------------------------------------------------------------------------------------------------------------------------------------------------------------------------------------------|
| <i>Solyc03g098720.3</i> | 2.43           | kunitz-type serine protease inhibitor DrTI-like       | N/A       | Serine protease inhibitor that inhibits chymotrypsin                                                                                                                                                  | <i>Increased protein degradation</i>                                                                                                                                                                   | Chang, Long-sen, et al. "Purification and characterization of a chymotrypsin inhibitor from the venom of <i>Ophiophagus hannah</i> (King Cobra)." <i>Biochemical and biophysical research communications</i> 283.4 (2001): 862-867.     |
| <i>Solyc07g062700.3</i> | 2.43           | sodium/calcium exchanger NCL                          | NCL       | Participates in the maintenance of calcium homeostasis; Plays a role in auxin response, diurnal rhythm, and flowering time; Involved in salt stress response                                          | <i>Promoted calcium homeostasis; Increased response to auxin; Promoted circadian rhythm; Promoted salt stress response</i>                                                                             | Wang, Peng, et al. "A Na <sup>+</sup> /Ca <sup>2+</sup> exchanger-like protein (AtNCL) involved in salt stress in <i>Arabidopsis</i> ." <i>Journal of Biological Chemistry</i> 287.53 (2012): 44062-44070.                              |
| <i>Solyc12g099260.2</i> | 2.43           | ATP-citrate synthase beta chain protein 2-like        | ACLA-2    | Used for the elongation of fatty acids and biosynthesis of isoprenoids, flavonoids, and malonated derivatives; Required for normal growth and development in seeds                                    | <i>Promoted seed development; Increased production of primary metabolites</i>                                                                                                                          | Fatland, Beth L., Basil J. Nikolau, and Eve Syrkin Wurtele. "Reverse genetic characterization of cytosolic acetyl-CoA generation by ATP-citrate lyase in <i>Arabidopsis</i> ." <i>The Plant Cell</i> 17.1 (2005): 182-203.              |
| <i>Solyc10g075160.1</i> | 2.41           | ferredoxin                                            | AT1G32550 | Ferredoxins are iron-sulfur proteins that transfer electrons in a wide variety of metabolic reactions                                                                                                 | <i>Promoted metabolism</i>                                                                                                                                                                             | Zapata, Luis, et al. "Chromosome-level assembly of <i>Arabidopsis thaliana</i> Ler reveals the extent of translocation and inversion polymorphisms." <i>Proceedings of the National Academy of Sciences</i> 113.28 (2016): E4052-E4060. |
| <i>Solyc04g011840.1</i> | 2.41           | monothiol glutaredoxin-S1-like                        | GRXS1     | Reduces GSH-thiol disulfides                                                                                                                                                                          | <i>Increased reduction of GSH-thiol disulfides</i>                                                                                                                                                     | Patterson, Kurt, et al. "Nitrate-regulated glutaredoxins control <i>Arabidopsis</i> primary root growth." <i>Plant Physiology</i> 170.2 (2016): 989-999.                                                                                |
| <i>Solyc05g056170.3</i> | 2.38           | phenylalanine ammonia-lyase 2                         | PAL2      | Enzyme of plant metabolism catalyzing the first reaction in the biosynthesis of a wide variety of natural products                                                                                    | <i>Increased biosynthesis of L-phenylalanine derivatives</i>                                                                                                                                           | Cochrane, Fiona C., Laurence B. Davin, and Norman G. Lewis. "The <i>Arabidopsis</i> phenylalanine ammonia lyase gene family: kinetic characterization of the four PAL isoforms." <i>Phytochemistry</i> 65.11 (2004): 1557-1564.         |
| <i>Solyc07g043500.1</i> | 2.33           | beta-D-glucosyl crocetin beta-1,6-glucosyltransferase | UGT94E5   | Glucosyltransferase catalyzing crocetin gentiobiosyl esters biosynthesis                                                                                                                              | <i>Promoted production of crocetin and crocin; Increased pigment production</i>                                                                                                                        | Nagatoshi, Mai, et al. "UGT75L6 and UGT94E5 mediate sequential glucosylation of crocetin to crocin in <i>Gardenia jasminoides</i> ." <i>FEBS letters</i> 586.7 (2012): 1055-1061.                                                       |
| <i>Solyc03g120990.3</i> | 2.31           | NADP-dependent malic enzyme, chloroplastic            | ME6       | Cecarboxylates malate shuttled from neighboring mesophyll cells; CO <sub>2</sub> released is refixed by RuBisCo; Eliminates the photorespiratory loss of CO <sub>2</sub> that occurs in most plants   | <i>Promoted photorespiratory efficiency of CO<sub>2</sub> loss</i>                                                                                                                                     | Cheng, Yuxiang, et al. "Expression, purification, and characterization of two NADP-malic enzymes of rice ( <i>Oryza sativa</i> L.) in <i>Escherichia coli</i> ." <i>Protein expression and purification</i> 45.1 (2006): 200-205.       |
| <i>Solyc04g071890.3</i> | 2.30           | peroxidase 12 precursor                               | PER12     | Involved in removal of H <sub>2</sub> O <sub>2</sub> , oxidation of toxic reductants, biosynthesis and degradation of lignin, suberization, auxin catabolism, and response to environmental stressors | <i>Increased removal of H<sub>2</sub>O<sub>2</sub>, oxidation of toxic reductants, biosynthesis and degradation of lignin, suberization, auxin catabolism, and response to environmental stressors</i> | Paynel, Florence, et al. "Temporal regulation of cell-wall pectin methylesterase and peroxidase isoforms in cadmium-treated flax hypocotyl." <i>Annals of botany</i> 104.7 (2009): 1363-1372.                                           |

| TomatoID                | DE in Infected | NCBI Protein Name                                 | Gene ID   | Uniprot Description                                                                                                                                                     | Putative Consequences for Infection                                                                                                                                              | Citation                                                                                                                                                                                                                                           |
|-------------------------|----------------|---------------------------------------------------|-----------|-------------------------------------------------------------------------------------------------------------------------------------------------------------------------|----------------------------------------------------------------------------------------------------------------------------------------------------------------------------------|----------------------------------------------------------------------------------------------------------------------------------------------------------------------------------------------------------------------------------------------------|
| <i>Solyc04g011830.1</i> | 2.29           | monothiol glutaredoxin-S1-like                    | GRXS1     | Reduces GSH-thiol disulfides                                                                                                                                            | <i>Increased reduction of GSH-thiol disulfides</i>                                                                                                                               | Patterson, Kurt, et al. "Nitrate-regulated glutaredoxins control Arabidopsis primary root growth." <i>Plant Physiology</i> 170.2 (2016): 989-999.                                                                                                  |
| <i>Solyc11g006910.2</i> | 2.28           | ferredoxin, root R-B2                             | N/A       | Ferredoxins are iron-sulfur proteins that transfer electrons in a wide variety of metabolic reactions                                                                   | <i>Promoted metabolism</i>                                                                                                                                                       | Wada, Keishiro, Masaaki Onda, and Hiroshi Matsubara. "Amino acid sequences of ferredoxin isoproteins from radish roots." <i>The Journal of Biochemistry</i> 105.4 (1989): 619-625.                                                                 |
| <i>Solyc02g088630.3</i> | 2.27           | probable galacturonosyltransferase 14             | GAUT14    | Involved in pectin and/or xylans biosynthesis in cell walls                                                                                                             | <i>Increased pectin and xylan biosynthesis; Increased cell wall expansion</i>                                                                                                    | Wang, Li, et al. "Arabidopsis galacturonosyltransferase (GAUT) 13 and GAUT14 have redundant functions in pollen tube growth." <i>Molecular plant</i> 6.4 (2013): 1131-1148.                                                                        |
| <i>Solyc07g049370.2</i> | 2.26           | glucan endo-1,3-beta-glucosidase 12               | AT4G29360 | Involved in carbohydrate metabolic process, cell wall organization, and plant defense response                                                                          | <i>Increased carbohydrate metabolism, cell wall organization, and plant defense response</i>                                                                                     | Wu, Qiong, et al. "Long-term balancing selection contributes to adaptation in Arabidopsis and its relatives." <i>Genome biology</i> 18.1 (2017): 1-15.                                                                                             |
| <i>Solyc09g061890.3</i> | 2.20           | probable pectate lyase 8                          | AT3G07010 | Involved in pectin catabolic process                                                                                                                                    | <i>Increased pectin catabolism</i>                                                                                                                                               | Weber, Hans, et al. "Selective and powerful stress gene expression in Arabidopsis in response to malondialdehyde." <i>The Plant Journal</i> 37.6 (2004): 877-888.                                                                                  |
| <i>Solyc02g071030.2</i> | 2.14           | chlorophyll a-b binding protein 1B, chloroplastic | LHCB1.3   | Light-harvesting complex functions as a light receptor; Captures and delivers excitation energy to photosystems                                                         | <i>Promoted light capture and photosynthesis</i>                                                                                                                                 | Yadav, Vandana, et al. "Light regulated modulation of Z-box containing promoters by photoreceptors and downstream regulatory components, COP1 and HYS, in Arabidopsis." <i>The Plant Journal</i> 31.6 (2002): 741-753.                             |
| <i>Solyc07g052510.4</i> | 2.13           | peroxidase 3 precursor                            | PER3      | Involved in removal of H2O2, oxidation of toxic reductants, biosynthesis and degradation of lignin, suberization, auxin catabolism, response to environmental stressors | <i>Increased removal of H2O2, oxidation of toxic reductants, biosynthesis and degradation of lignin, suberization, auxin catabolism, and response to environmental stressors</i> | Paynel, Florence, et al. "Temporal regulation of cell-wall pectin methylesterase and peroxidase isoforms in cadmium-treated flax hypocotyl." <i>Annals of botany</i> 104.7 (2009): 1363-1372.                                                      |
| <i>Solyc06g083650.3</i> | 2.12           | GDSL esterase/lipase At5g33370                    | AT5G33370 | Involved in cuticle development; Involved in lipid catabolism                                                                                                           | <i>Increased cuticle development; Increased lipid catabolism</i>                                                                                                                 | Li-Beisson, Yonghua, et al. "Acyl-lipid metabolism." <i>The Arabidopsis book/American Society of Plant Biologists</i> 11 (2013).                                                                                                                   |
| <i>Solyc09g065620.3</i> | 2.12           | chlorophyllase-2, chloroplastic isoform X4        | CLH2      | Catalyzes the hydrolysis of ester bond in chlorophyll to yield chlorophyllide and phytol                                                                                | <i>Increased chlorophyllide and phytol photosynthesis; Promoted photosynthesis</i>                                                                                               | Tsuchiya, Tohru, et al. "Cloning of chlorophyllase, the key enzyme in chlorophyll degradation: finding of a lipase motif and the induction by methyl jasmonate." <i>Proceedings of the National Academy of Sciences</i> 96.26 (1999): 15362-15367. |
| <i>Solyc12g014420.2</i> | 2.12           | glucan endo-1,3-beta-glucosidase 13-like          | AT5G56590 | Involved in carbohydrate metabolic process, cell wall organization, and plant defense response                                                                          | <i>Increased carbohydrate metabolism, cell wall organization, and plant defense response</i>                                                                                     | Wu, Qiong, et al. "Long-term balancing selection contributes to adaptation in Arabidopsis and its relatives." <i>Genome biology</i> 18.1 (2017): 1-15.                                                                                             |
| <i>Solyc06g053640.1</i> | 2.08           | RING-H2 finger protein ATL16-like                 | ATL16     | Involved in protein ubiquitination                                                                                                                                      | <i>Promoted protein ubiquitination</i>                                                                                                                                           | Thieme, Christoph J., et al. "Endogenous Arabidopsis messenger RNAs transported to distant tissues." <i>Nature Plants</i> 1.4 (2015): 1-9.                                                                                                         |
| <i>Solyc05g005160.3</i> | 2.07           | ATP-citrate synthase alpha chain protein 2        | ACLA-2    | ATP citrate-lyase is the primary enzyme responsible for the synthesis of cytosolic acetyl-CoA; Required for normal growth and development in seeds                      | <i>Promoted seed development; Increased production of primary metabolites</i>                                                                                                    | Fatland, Beth L., Basil J. Nikolau, and Eve Syrkin Wurtele. "Reverse genetic characterization of cytosolic acetyl-CoA generation by ATP-citrate lyase in Arabidopsis." <i>The Plant Cell</i> 17.1 (2005): 182-203.                                 |

| TomatoID         | DE in Infected | NCBI Protein Name                                      | Gene ID | Uniprot Description                                                                                                                                                              | Putative Consequences for Infection                                                                              | Citation                                                                                                                                                                                                                                                                                                                                  |
|------------------|----------------|--------------------------------------------------------|---------|----------------------------------------------------------------------------------------------------------------------------------------------------------------------------------|------------------------------------------------------------------------------------------------------------------|-------------------------------------------------------------------------------------------------------------------------------------------------------------------------------------------------------------------------------------------------------------------------------------------------------------------------------------------|
| Solyc08g083370.3 | 2.06           | soluble inorganic pyrophosphatase PPA1-like isoform X1 | PPA1    | Controls the equilibrium of gluconeogenic reactions in the heterotrophic growth phase of early seedling establishment                                                            | <i>Promoted equilibration gluconeogenic reactions</i>                                                            | Navarro-De la Sancha, Ernesto, et al. "Characterization of two soluble inorganic pyrophosphatases from Arabidopsis thaliana." Plant science 172.4 (2007): 796-807.                                                                                                                                                                        |
| Solyc12g040570.1 | 2.05           | 6-phosphogluconate dehydrogenase, decarboxylating 3    | PGD3    | Essential component in cell redox homeostasis                                                                                                                                    | <i>Increased cell redox homeostasis</i>                                                                          | Fernández-Fernández, Álvaro D., and Francisco J. Corpas. "In silico analysis of Arabidopsis thaliana peroxisomal 6-phosphogluconate dehydrogenase." Scientifica 2016 (2016).                                                                                                                                                              |
| Solyc09g008280.2 | 2.04           | S-adenosylmethionine synthase 3                        | METK3   | Catalyzes the formation of S-adenosylmethionine from methionine; Involved in SA-mediated defense; Involved in the biosynthesis of lignin                                         | <i>Increased S-adenosylmethionine production; Promoted early defense response; Increased lignin biosynthesis</i> | Goto, Derek B., et al. "A single-nucleotide mutation in a gene encoding S-adenosylmethionine synthetase is associated with methionine over-accumulation phenotype in Arabidopsis thaliana." Genes & genetic systems 77.2 (2002): 89-95.                                                                                                   |
| Solyc07g017600.3 | 2.04           | pectinesterase/pectinesterase inhibitor PPE8B          | N/A     | Plays roles in the deposition of pectin in developing tissues and in the wall loosening and cell separation that occurs in cell expansion, fruit ripening and abscission.        | <i>Increased pectin deposition and plant cell wall loosening</i>                                                 | Glover, H., et al. "Multiple pectin esterase genes are expressed in ripening peach fruit: nucleotide sequence of a cDNA encoding peach pectin esterase." Plant Physiology 112 (1996): 864-864.                                                                                                                                            |
| Solyc02g093230.3 | 2.03           | caffeoyl-CoA O-methyltransferase 1                     | CCOAMT1 | Involved in the reinforcement of the plant cell wall; Involved in response to wounding or pathogen challenge by promoting the formation of cell wall-bound ferulic acid polymers | <i>Increased production of feruloylated polysaccharides; Promoted plant cell wall development and integrity</i>  | Meyermans, Hugo, et al. "Modifications in lignin and accumulation of phenolic glucosides in poplar xylem upon down-regulation of caffeoyl-coenzyme A O-methyltransferase, an enzyme involved in lignin biosynthesis." Journal of Biological Chemistry 275.47 (2000): 36899-36909.                                                         |
| Solyc10g050160.2 | 2.02           | caffeoyl-CoA O-methyltransferase 5                     | CCOAMT5 | Plays a role in the synthesis of feruloylated polysaccharides; Involved in the reinforcement of the plant cell wall; Involved in response to wounding or pathogen challenge      | <i>Increased production of feruloylated polysaccharides; Promoted plant cell wall development and integrity</i>  | Meyermans, Hugo, et al. "Modifications in lignin and accumulation of phenolic glucosides in poplar xylem upon down-regulation of caffeoyl-coenzyme A O-methyltransferase, an enzyme involved in lignin biosynthesis." Journal of Biological Chemistry 275.47 (2000): 36899-36909.                                                         |
| Solyc07g007590.1 | 2.01           | arogenate dehydrogenase 2, chloroplastic-like          | TYRAAT2 | Involved in the biosynthesis of tyrosine                                                                                                                                         | <i>Increased production of tyrosine biosynthesis</i>                                                             | Rippert, Pascal, and Michel Matringe. "Purification and kinetic analysis of the two recombinant arogenate dehydrogenase isoforms of Arabidopsis thaliana." European Journal of Biochemistry 269.19 (2002): 4753-4761.                                                                                                                     |
| Solyc02g082260.3 | 2.00           | 3-hydroxy-3-methylglutaryl-coenzyme A reductase 1      | HMG1    | Catalyzes the synthesis of mevalonate, the specific precursor of all isoprenoid compounds present in plants                                                                      | <i>Increased synthesis of isoprenoids</i>                                                                        | Dale, Susan, et al. "Bacterial expression of the catalytic domain of 3-hydroxy-3-methylglutaryl-coa reductase (isoform HMGR1) from Arabidopsis thaliana, and Its inactivation by phosphorylation at Ser577 by Brassica oleracea 3-hydroxy-3-methylglutaryl-CoA reductase kinase." European Journal of Biochemistry 233.2 (1995): 506-513. |
| Solyc12g096490.1 | -2.05          | protein GLUTAMINE DUMPER 5-like                        | GDU5    | Involved in the regulation of the amino acid metabolism                                                                                                                          | <i>Impaired amino acid transport; Impaired regulation of amino acid metabolism</i>                               | Pratelli, Réjane, et al. "Stimulation of nonselective amino acid export by glutamine dumper proteins." Plant Physiology 152.2 (2010): 762-773.                                                                                                                                                                                            |



| TomatoID         | DE in Infected | NCBI Protein Name                                                            | Gene ID      | Uniprot Description                                                                                                                                                     | Putative Consequences for Infection                                                        | Citation                                                                                                                                                                                                                                                                |
|------------------|----------------|------------------------------------------------------------------------------|--------------|-------------------------------------------------------------------------------------------------------------------------------------------------------------------------|--------------------------------------------------------------------------------------------|-------------------------------------------------------------------------------------------------------------------------------------------------------------------------------------------------------------------------------------------------------------------------|
| Solyc00g203660.2 | -2.09          | ribulose-1,5-bisphosphate carboxylase/oxygenase large subunit                | rbcL         | RuBisCO catalyzes two reactions: Participates in the the carboxylation of D-ribulose 1,5-bisphosphate of RuBisCO                                                        | Decreased RuBisCo catalysis                                                                | Chun, Louis, Alana Kawakami, and David A. Christopher. "Phytochrome A mediates blue light and UV-A-dependent chloroplast gene transcription in green leaves." <i>Plant Physiology</i> 125.4 (2001): 1957-1966.                                                          |
| Solyc04g080040.3 | -2.22          | J domain-containing protein required for chloroplast accumulation response 1 | JAC1         | Required for chloroplast photorelocation movement                                                                                                                       | Impaired photoperiodism                                                                    | Suetsugu, Noriyuki, Takatoshi Kagawa, and Masamitsu Wada. "An auxilin-like J-domain protein, JAC1, regulates phototropin-mediated chloroplast movement in Arabidopsis." <i>Plant Physiology</i> 139.1 (2005): 151-162.                                                  |
| Solyc10g005080.3 | -2.27          | protein LHY isoform X2                                                       | LHY          | Transcription factor involved in the circadian clock; Represses CCA1                                                                                                    | Impaired circadian rhythm; Impaired regulation of CCA1                                     | Mizoguchi, Tsuyoshi, et al. "LHY and CCA1 are partially redundant genes required to maintain circadian rhythms in Arabidopsis." <i>Developmental cell</i> 2.5 (2002): 629-641.                                                                                          |
| Solyc11g066510.2 | -2.29          | RING-H2 finger protein ATL57                                                 | ATL57        | Involved in the pathway protein ubiquitination, which is part of protein modification                                                                                   | Impaired protein ubiquitination                                                            | Thieme, Christoph J., et al. "Endogenous Arabidopsis messenger RNAs transported to distant tissues." <i>Nature Plants</i> 1.4 (2015): 1-9.                                                                                                                              |
| Solyc12g005750.1 | -2.29          | B-box domain protein 30                                                      | MIP1A        | Developmental regulator; Involved in the CO-mediated long-day flowering-promotion pathway                                                                               | Decreased sequestration of CO and CO-like proteins; Impaired flowering                     | Graeff, Moritz, et al. "MicroProtein-mediated recruitment of CONSTANS into a TOPLESS trimeric complex represses flowering in Arabidopsis." <i>PLoS genetics</i> 12.3 (2016): e1005959.                                                                                  |
| Solyc01g110360.3 | -2.30          | fructose-bisphosphate aldolase 1                                             | FBA1         | Plays a key role in glycolysis and gluconeogenesis                                                                                                                      | Impaired glycolysis and gluconeogenesis                                                    | Searle, Iain R., et al. "Long-distance signaling in nodulation directed by a CLAVATA1-like receptor kinase." <i>Science</i> 299.5603 (2003): 109-112.                                                                                                                   |
| Solyc07g005210.3 | -2.33          | temperature-induced lipocalin-1                                              | TIL          | Involved in basal and acquired thermotolerance; Lipocalin that confers protection against oxidative stress caused by heat, hypersalinity, freezing, paraquat, and light | Impaired thermotolerance; Impaired tolerance to salt stress, freezing, paraquat, and light | Abo-Ogiala, Atef, et al. "Temperature-induced lipocalin (TIL) is translocated under salt stress and protects chloroplasts from ion toxicity." <i>Journal of plant physiology</i> 171.3-4 (2014): 250-259.                                                               |
| Solyc11g005290.1 | -2.40          | RING-H2 finger protein ATL78-like                                            | ATL78        | Involved in the pathway protein ubiquitination, which is part of protein modification                                                                                   | Impaired protein ubiquitination                                                            | Thieme, Christoph J., et al. "Endogenous Arabidopsis messenger RNAs transported to distant tissues." <i>Nature Plants</i> 1.4 (2015): 1-9.                                                                                                                              |
| Solyc07g006600.1 | -2.42          | protein GLUTAMINE DUMPER 2                                                   | GDU2         | Subunit of an amino acid transporter involved in the regulation of the amino acid metabolism                                                                            | Impaired regulation of amino acid metabolism                                               | Pratelli, Réjane, et al. "Stimulation of nonselective amino acid export by glutamine dumper proteins." <i>Plant Physiology</i> 152.2 (2010): 762-773.                                                                                                                   |
| Solyc12g099200.2 | -2.47          | cell wall invertase inhibitor precursor                                      | LOC107808322 | Enzyme inhibitor activity                                                                                                                                               | Decreased enzyme inhibition                                                                | Hothorn, Michael, and Klaus Scheffzek. "Multiple crystal forms of the cell-wall invertase inhibitor from tobacco support high conformational rigidity over a broad pH range." <i>Acta Crystallographica Section D: Biological Crystallography</i> 62.6 (2006): 665-670. |

| TomatoID         | DE in Infected | NCBI Protein Name                           | Gene ID | Uniprot Description                                                                                                                                                  | Putative Consequences for Infection                                                            | Citation                                                                                                                                                                                                                              |
|------------------|----------------|---------------------------------------------|---------|----------------------------------------------------------------------------------------------------------------------------------------------------------------------|------------------------------------------------------------------------------------------------|---------------------------------------------------------------------------------------------------------------------------------------------------------------------------------------------------------------------------------------|
| Solyc02g065220.3 | -2.56          | geraniol 8-hydroxylase-like                 | CYP76B6 | Hydroxylase involved in the biosynthesis of hydroxygeraniol, a precursor of the                                                                                      | Decreased biosynthesis of hydroxygeraniol                                                      | Collu, Graziella, et al. "Activity of the cytochrome P450 enzyme geraniol 10-hydroxylase and alkaloid production in plant cell cultures." <i>Plant Science</i> 162.1 (2002): 165-                                                     |
| Solyc01g080460.3 | -2.61          | pyruvate, phosphate dikinase, chloroplastic | PPDK    | Formation of phosphoenolpyruvate, which is the primary acceptor of CO2 in C4 and Crassulacean plants                                                                 | Impaired primary metabolism                                                                    | Rosche, Elke, and Peter Westhoff. "Primary structure of pyruvate, orthophosphate dikinase in the dicotyledonous C4 plant <i>Flaveria trinervia</i> ." <i>FEBS letters</i> 273.1-2 (1990): 116-121.                                    |
| Solyc12g087870.2 | -2.62          | purine permease 3-like                      | PUP3    | Involved in transport of purine derivatives during pollen germination and tube elongation                                                                            | Impaired transport of purine derivatives during pollen germination and tube elongation         | Bürkle, Lukas, et al. "Transport of cytokinins mediated by purine transporters of the PUP family expressed in phloem, hydathodes, and pollen of <i>Arabidopsis</i> ." <i>The Plant Journal</i> 34.1 (2003): 13-26.                    |
| Solyc03g115920.3 | -2.77          | probable E3 ubiquitin-protein ligase RNF217 | RNF217  | E3 ubiquitin-protein ligase which accepts ubiquitin from E2 ubiquitin-conjugating enzymes in the form of a thioester                                                 | Impaired primary metabolism                                                                    | Ohmura-Hoshino, Mari, et al. "A novel family of membrane-bound E3 ubiquitin ligases." <i>Journal of biochemistry</i> 140.2 (2006): 147-154.                                                                                           |
| Solyc09g010530.3 | -3.57          | cation/H(+) antiporter 20                   | CHX20   | Operates as a K+/H+ antiporter that maintains K+ homeostasis in guard cells; Helps regulate pH; Plays a critical role in osmoregulation through via stomatal opening | Impaired K+ homeostasis and pH homeostasis; Impaired osmoregulation                            | Padmanaban, Senthilkumar, et al. "Participation of endomembrane cation/H+ exchanger AtCHX20 in osmoregulation of guard cells." <i>Plant Physiology</i> 144.1 (2007): 82-93.                                                           |
| Solyc09g065790.1 | -5.14          | clp protease proteolytic subunit            | CLPR2   | Required for chloroplast development and integrity; Involved in the regulation of plastoglobules formation                                                           | Impaired chloroplast development and integrity; Impaired regulation of plastoglobule formation | Rudella, Andrea, et al. "Downregulation of ClpR2 leads to reduced accumulation of the ClpPRS protease complex and defects in chloroplast biogenesis in <i>Arabidopsis</i> ." <i>The Plant Cell</i> 18.7 (2006): 1704-1721.            |
| Solyc09g064580.2 | -5.99          | photosystem II protein M                    | psbM    | Component of the core complex of photosystem II; Light-driven water:plastoquinone oxidoreductase that uses light energy to abstract electrons from H2O               | Impaired light capture and photosynthesis                                                      | Kawakami, Keisuke, et al. "Location of chloride and its possible functions in oxygen-evolving photosystem II revealed by X-ray crystallography." <i>Proceedings of the National Academy of Sciences</i> 106.21 (2009): 8567-8572.     |
| Solyc01g017220.1 | -6.05          | ATP synthase CF1 epsilon subunit            | atpE    | Produces ATP from ADP in the presence of a proton gradient across the membrane                                                                                       | Impaired ATP production                                                                        | Goulas, Estelle, et al. "The chloroplast lumen and stromal proteomes of <i>Arabidopsis thaliana</i> show differential sensitivity to short-and long-term exposure to low temperature." <i>The Plant Journal</i> 47.5 (2006): 720-734. |
| Solyc04g039850.1 | -6.40          | ATP synthase beta subunit                   | atpB    | Produces ATP from ADP in the presence of a proton gradient across the membrane                                                                                       | Impaired ATP production                                                                        | Goulas, Estelle, et al. "The chloroplast lumen and stromal proteomes of <i>Arabidopsis thaliana</i> show differential sensitivity to short-and long-term exposure to low temperature." <i>The Plant Journal</i> 47.5 (2006): 720-734. |
