# Supplementary material for: Effects of ‘Candidatus Liberibacter solanacearum’ haplotypes A and B on tomato gene expression and geotropism
Source: PubMed Central journal article supplement (PMC8966271; doi:10.1186/s12870-022-03505-z), 2022-03-30
Supplement: 12870_2022_3505_MOESM8_ESM.pdf [file 12870_2022_3505_MOESM8_ESM.pdf]

| TomatoID         | DE in Infected | NCBI Protein Name                            | Gene ID | Uniprot Description                                                                                                                                                                                                                                                                                      | Putative Consequences for Infection                                                                                                                                                                                    | Citation                                                                                                                                                                                                     |
|------------------|----------------|----------------------------------------------|---------|----------------------------------------------------------------------------------------------------------------------------------------------------------------------------------------------------------------------------------------------------------------------------------------------------------|------------------------------------------------------------------------------------------------------------------------------------------------------------------------------------------------------------------------|--------------------------------------------------------------------------------------------------------------------------------------------------------------------------------------------------------------|
| Solyc07g008570.3 | 6.14           | probable inactive purple acid phosphatase 27 | PAP27   | Acid phosphatase activity; Metal ion binding                                                                                                                                                                                                                                                             | N/A                                                                                                                                                                                                                    | Cheng, Chia-Yi, et al. "Araport11: a complete reannotation of the Arabidopsis thaliana reference genome." The Plant Journal 89.4 (2017): 789-804.                                                            |
| Solyc12g009220.2 | 4.88           | jasmonate ZIM-domain protein 2               | NtJAZ2  | Involved in regulation of defense response; Involved in regulation of JA-mediated signaling pathway; Involved in response to wounding                                                                                                                                                                    | Increased regulation of defense response; Increased regulation of JA-mediated signaling; Increased response to wounding                                                                                                | Shoji, Tsubasa, Takayuki Ogawa, and Takashi Hashimoto. "Jasmonate-induced nicotine formation in tobacco is mediated by tobacco COI1 and JAZ genes." Plant and cell physiology 49.7 (2008): 1003-1012.        |
| Solyc06g076020.3 | 4.79           | heat shock cognate 70 kDa protein 1          | HSP70-1 | Facilitates folding of de novo proteins, assists translocation of precursor proteins into organelles; Degrades damaged protein under stress conditions; Involved in defense response; Involved in protein transport to chloroplasts; Modulates stomatal aperture in response to environmental conditions | Increased protein folding; Increased translocation of precursor proteins into organelles; Increased degradation of damaged proteins; Promoted defense response; Increased response to abiotic stress and ABA signaling | Sung, Dong Yul, and Charles L. Guy. "Physiological and molecular assessment of altered expression of Hsc70-1 in Arabidopsis. Evidence for pleiotropic consequences." Plant Physiology 132.2 (2003): 979-987. |
| Solyc11g071740.2 | 4.64           | putative calcium-binding protein CML19       | CML19   | Calcium sensor                                                                                                                                                                                                                                                                                           | Promoted calcium sensing                                                                                                                                                                                               | Boonburapong, Bongkoj, and Teerapong Buaboocha. "Genome-wide identification and analyses of the rice calmodulin and related potential calcium sensor proteins." BMC plant biology 7.1 (2007): 4.             |
| Solyc06g051940.3 | 4.04           | protein phosphatase 2C                       | PP2CA   | Major negative regulator of ABA responses during seed germination and cold acclimation; Prevents stomata closure                                                                                                                                                                                         | <i>Impaired ABA responses; Promoted stomatal opening</i>                                                                                                                                                               | Chérel, Isabelle, et al. "Physical and functional interaction of the Arabidopsis K <sup>+</sup> channel AKT2 and phosphatase AtPP2CA." The Plant Cell 14.5 (2002): 1133-1146.                                |
| Solyc01g007030.3 | 3.99           | E3 ubiquitin-protein ligase PUB22-like       | PUB22   | Negatively regulates water stress response; Mediates drought signaling pathway; Negative regulator of immune response triggered by PAMPs                                                                                                                                                                 | <i>Impaired response to drought; Impaired response to PAMPs; Impaired attenuation to PAMP-induced signaling</i>                                                                                                        | Trujillo, Marco, et al. "Negative regulation of PAMP-triggered immunity by an E3 ubiquitin ligase triplet in Arabidopsis." Current Biology 18.18 (2008): 1396-1401.                                          |
| Solyc03g013160.3 | 3.99           | amino acid transporter AVT1I                 | AVT1I   | Amino acid transporter                                                                                                                                                                                                                                                                                   | Increased amino acid transport                                                                                                                                                                                         | Fujiki, Yuki, et al. "Functional identification of AtAVT3, a family of vacuolar amino acid transporters, in Arabidopsis." FEBS letters 591.1 (2017): 5-15.                                                   |
| Solyc06g073830.1 | 3.69           | putative calcium-binding protein CML19       | CML19   | Calcium sensor                                                                                                                                                                                                                                                                                           | Promoted calcium sensing                                                                                                                                                                                               | Boonburapong, Bongkoj, and Teerapong Buaboocha. "Genome-wide identification and analyses of the rice calmodulin and related potential calcium sensor proteins." BMC plant biology 7.1 (2007): 4.             |
| Solyc01g096670.3 | 3.64           | cytochrome P450 98A2                         | CYP98A2 | Heme binding, iron ion binding, oxidoreductase activity, acting on paired donors                                                                                                                                                                                                                         | N/A                                                                                                                                                                                                                    | N/A                                                                                                                                                                                                          |
| Solyc01g007040.3 | 3.63           | E3 ubiquitin-protein ligase PUB22-like       | PUB22   | Negatively regulates water stress response; Mediates drought signaling pathway; Negative regulator of immune response triggered by PAMPs                                                                                                                                                                 | <i>Impaired response to drought; Impaired response to PAMPs; Impaired attenuation to PAMP-induced signaling</i>                                                                                                        | Trujillo, Marco, et al. "Negative regulation of PAMP-triggered immunity by an E3 ubiquitin ligase triplet in Arabidopsis." Current Biology 18.18 (2008): 1396-1401.                                          |

| TomatoID         | DE in Infected | NCBI Protein Name                                  | Gene ID | Uniprot Description                                                                                                                                | Putative Consequences for Infection                                                                             | Citation                                                                                                                                                                                                                                       |
|------------------|----------------|----------------------------------------------------|---------|----------------------------------------------------------------------------------------------------------------------------------------------------|-----------------------------------------------------------------------------------------------------------------|------------------------------------------------------------------------------------------------------------------------------------------------------------------------------------------------------------------------------------------------|
| Solyc11g010170.2 | 3.58           | lanC-like protein GCL1                             | GCL1    | Plays a role in signaling                                                                                                                          | N/A                                                                                                             | Gao, Yajun, et al. "Genetic characterization reveals no role for the reported ABA receptor, GCR2, in ABA control of seed germination and early seedling development in Arabidopsis." <i>The Plant Journal</i> 52.6 (2007): 1001-1013.          |
| Solyc04g082140.3 | 3.52           | multicopper oxidase-like protein precursor         | LPR1    | Multicopper oxidase involved in Cu homeostasis and oxidative stress response; Necessary for root growth inhibition                                 | Promoted copper homeostasis; Increased response to oxidative stress; Root growth inhibition                     | Svistoonoff, Sergio, et al. "Root tip contact with low-phosphate media reprograms plant root architecture." <i>Nature genetics</i> 39.6 (2007): 792-796.                                                                                       |
| Solyc00g095860.1 | 3.51           | 1-aminocyclopropane-1-carboxylate synthase-like    | ACS1    | Involved in ethylene biosynthesis                                                                                                                  | Increased ethylene biosynthesis; Increased ethylene-related signaling                                           | Tsuchisaka, Atsunari, et al. "A combinatorial interplay among the 1-aminocyclopropane-1-carboxylate isoforms regulates ethylene biosynthesis in Arabidopsis thaliana." <i>Genetics</i> 183.3 (2009): 979-1003.                                 |
| Solyc08g081550.3 | 3.14           | 1-aminocyclopropane-1-carboxylate synthase         | ACS1    | Involved in ethylene biosynthesis                                                                                                                  | Increased ethylene biosynthesis                                                                                 | Tsuchisaka, Atsunari, et al. "A combinatorial interplay among the 1-aminocyclopropane-1-carboxylate isoforms regulates ethylene biosynthesis in Arabidopsis thaliana." <i>Genetics</i> 183.3 (2009): 979-1003.                                 |
| Solyc08g077020.1 | 3.04           | auxin-responsive protein SAUR76                    | SAUR76  | Involved in the regulation of ethylene receptor signaling; Promotes cell expansion and plant growth; Involved in the regulation of cell elongation | Increased ethylene receptor signaling; Promoted cell expansion and plant growth/development; Leaf curl          | Markakis, Marios Nektarios, et al. "Characterization of a small auxin-up RNA (SAUR)-like gene involved in Arabidopsis thaliana development." <i>PLoS one</i> 8.11 (2013): e82596.                                                              |
| Solyc01g097520.3 | 3.03           | annexin D4-like                                    | ANN4    | Involved in osmotic stress response and ABA signaling                                                                                              | Increased osmotic stress and ABA signaling                                                                      | Lee, Sumin, et al. "Proteomic identification of annexins, calcium-dependent membrane binding proteins that mediate osmotic stress and abscisic acid signal transduction in Arabidopsis." <i>The Plant Cell</i> 16.6 (2004): 1378-1391.         |
| Solyc03g096290.3 | 2.99           | aquaporin PIP1-7                                   | PIP1-1  | Water channel required to facilitate the transport of water across cell membrane                                                                   | Increased water transport                                                                                       | Marmagne, Anne, et al. "Identification of new intrinsic proteins in Arabidopsis plasma membrane proteome." <i>Molecular &amp; Cellular Proteomics</i> 3.7 (2004): 675-691.                                                                     |
| Solyc01g007020.3 | 2.92           | E3 ubiquitin-protein ligase PUB22-like             | PUB22   | Negatively regulates water stress response; Mediates drought signaling pathway; Negative regulator of immune response triggered by PAMPs           | <i>Impaired response to drought; Impaired response to PAMPs; Impaired attenuation to PAMP-induced signaling</i> | Trujillo, Marco, et al. "Negative regulation of PAMP-triggered immunity by an E3 ubiquitin ligase triplet in Arabidopsis." <i>Current Biology</i> 18.18 (2008): 1396-1401.                                                                     |
| Solyc04g071770.3 | 2.79           | ethylene-responsive transcription factor ABR1-like | ABR1    | Negative regulator of the ABA signaling pathway involved in seed germination and in response to stressors                                          | Increased ABA signaling; Increased response to stress and pathogenesis                                          | Pandey, Girdhar K., et al. "ABR1, an APETALA2-domain transcription factor that functions as a repressor of ABA response in Arabidopsis." <i>Plant Physiology</i> 139.3 (2005): 1185-1193.                                                      |
| Solyc03g093610.1 | 2.77           | ethylene response factor A.2                       | ERF2    | Involved in defense response; Involved in intracellular signal transduction; Involved in lipid metabolism                                          | Increased defense response; Increased intracellular signal transduction; Increased lipid metabolism             | Zhang, Zhijian, et al. "Transcriptional regulation of the ethylene response factor LeERF2 in the expression of ethylene biosynthesis genes controls ethylene production in tomato and tobacco." <i>Plant Physiology</i> 150.1 (2009): 365-377. |

| TomatoID         | DE in Infected | NCBI Protein Name                                        | Gene ID   | Uniprot Description                                                                                                                                       | Putative Consequences for Infection                                                                                                   | Citation                                                                                                                                                                                                                    |
|------------------|----------------|----------------------------------------------------------|-----------|-----------------------------------------------------------------------------------------------------------------------------------------------------------|---------------------------------------------------------------------------------------------------------------------------------------|-----------------------------------------------------------------------------------------------------------------------------------------------------------------------------------------------------------------------------|
| Solyc04g079360.1 | 2.77           | transcription factor MYB44-like                          | MYB44     | Represses the expression of protein phosphatases 2C in response to ABA; Auxin-responsive; Promotes SA-mediated defense, but represses JA-mediated defense | Increases response to ABA; Increased response to auxin signaling; Increases SA-mediated defense; Decreased JA-mediated defense        | Riechmann, José Luis, et al. "Arabidopsis transcription factors: genome-wide comparative analysis among eukaryotes." <i>Science</i> 290.5499 (2000): 2105-2110.                                                             |
| Solyc07g008560.3 | 2.72           | probable inactive purple acid phosphatase 27             | PAP27     | Acid phosphatase activity; Metal ion binding                                                                                                              | N/A                                                                                                                                   | Cheng, Chia-Yi, et al. "Araport11: a complete reannotation of the Arabidopsis thaliana reference genome." <i>The Plant Journal</i> 89.4 (2017): 789-804.                                                                    |
| Solyc04g009440.3 | 2.68           | NAC domain protein                                       | NAC002    | Involved in cellular response to hypoxia; Involved in regulation of ABA-activated signaling pathway; Involved in response to wounding                     | Increased cellular response to hypoxia; Increased in regulation of ABA-activated signaling pathway; Increased in response to wounding | "Molecular characterization of Brassica napus NAC domain transcriptional activators induced in response to biotic and abiotic stress."                                                                                      |
| Solyc02g064680.3 | 2.67           | calcium-transporting ATPase 2, plasma membrane-type-like | ACA2      | Catalyzes the hydrolysis of ATP coupled with the translocation of calcium from the cytosol into the endoplasmic reticulum                                 | Increased ATP-dependent translocation of calcium into the endoplasmic reticulum                                                       | Harper, Jeffrey F., et al. "A novel calmodulin-regulated Ca <sup>2+</sup> -ATPase (ACA2) from Arabidopsis with an N-terminal autoinhibitory domain." <i>Journal of Biological Chemistry</i> 273.2 (1998): 1099-1106.        |
| Solyc03g122190.3 | 2.66           | salt responsive protein 1                                | SISR1     | Involved in regulation of defense; Involved in regulation of JA-mediated signaling pathway                                                                | Promoted regulation of defense; Promoted regulation of JA-mediated signaling pathway                                                  | Ouyang, Bo, et al. "Identification of early salt stress response genes in tomato root by suppression subtractive hybridization and microarray analysis." <i>Journal of experimental botany</i> 58.3 (2007): 507-520.        |
| Solyc02g080190.3 | 2.63           | nuclear transport factor 2B                              | NTF2B     | Part of a multicomponent system of cytosolic factors that assemble at the pore complex during nuclear import                                              | Increased protein transport into the nucleus                                                                                          | Zhao, Qiao, et al. "Identification and characterization of the Arabidopsis orthologs of nuclear transport factor 2, the nuclear import factor of ran." <i>Plant physiology</i> 140.3 (2006): 869-878.                       |
| Solyc03g007230.3 | 2.56           | protein phosphatase 2C 51-like                           | AT3G63340 | Metal ion binding; Protein serine/threonine phosphatase activity                                                                                          | N/A                                                                                                                                   | Cheng, Chia-Yi, et al. "Araport11: a complete reannotation of the Arabidopsis thaliana reference genome." <i>The Plant Journal</i> 89.4 (2017): 789-804.                                                                    |
| Solyc02g083850.3 | 2.54           | calcium-dependent protein kinase 18-like                 | CPK18     | Plays a role in signal transduction pathways that involve calcium as a second messenger                                                                   | Promoted calcium-dependent signaling                                                                                                  | Cheng, Shu-Hua, et al. "Calcium signaling through protein kinases. The Arabidopsis calcium-dependent protein kinase gene family." <i>Plant physiology</i> 129.2 (2002): 469-485.                                            |
| Solyc07g008550.3 | 2.51           | probable inactive purple acid phosphatase 27             | PAP27     | Acid phosphatase activity; Metal ion binding                                                                                                              | N/A                                                                                                                                   | Cheng, Chia-Yi, et al. "Araport11: a complete reannotation of the Arabidopsis thaliana reference genome." <i>The Plant Journal</i> 89.4 (2017): 789-804.                                                                    |
| Solyc06g082440.1 | 2.45           | CBL-interacting protein kinase 11                        | CIPK11    | Acts as a negative regulator of the plasma membrane proton pump AHA2 by preventing its interaction with 14-3-3 protein                                    | Increased activity of plasma membrane proton pump                                                                                     | Fuglsang, Anja T., et al. "Arabidopsis protein kinase PK55 inhibits the plasma membrane H <sup>+</sup> -ATPase by preventing interaction with 14-3-3 protein." <i>The Plant Cell</i> 19.5 (2007): 1617-1634.                |
| Solyc10g006700.1 | 2.39           | calcium-binding protein PBP1                             | PBP1      | Potential calcium sensor                                                                                                                                  | Promoted calcium sensing; Promoted regulation of trichome morphogenesis                                                               | Reddy, Vaka S., et al. "KIC, a novel Ca <sup>2+</sup> binding protein with one EF-hand motif, interacts with a microtubule motor protein and regulates trichome morphogenesis." <i>The Plant Cell</i> 16.1 (2004): 185-200. |

| TomatoID         | DE in Infected | NCBI Protein Name                              | Gene ID   | Uniprot Description                                                                                                                                                                                                     | Putative Consequences for Infection                                                                                                                                                                          | Citation                                                                                                                                                                                                                                          |
|------------------|----------------|------------------------------------------------|-----------|-------------------------------------------------------------------------------------------------------------------------------------------------------------------------------------------------------------------------|--------------------------------------------------------------------------------------------------------------------------------------------------------------------------------------------------------------|---------------------------------------------------------------------------------------------------------------------------------------------------------------------------------------------------------------------------------------------------|
| Solyc12g088190.2 | 2.39           | amino acid permease 6                          | AAP6      | Involved in the uptake of amino acids diffusing out of the xylem tracheids into the xylem parenchyma                                                                                                                    | Increased amino acid uptake and mobilization                                                                                                                                                                 | Okumoto, Sakiko, et al. "High affinity amino acid transporters specifically expressed in xylem parenchyma and developing seeds of Arabidopsis." <i>Journal of Biological Chemistry</i> 277.47 (2002): 45338-45346.                                |
| Solyc03g115380.2 | 2.28           | UDP-glucose 6-dehydrogenase 1-like             | UGD1      | Involved in the biosynthesis of UDP-glucuronic acid, providing nucleotide sugars for cell-wall polymers                                                                                                                 | Increased nucleotide transport for cell-wall polymers                                                                                                                                                        | Oka, Takuji, and Yoshifumi Jigami. "Reconstruction of de novo pathway for synthesis of UDP-glucuronic acid and UDP-xylose from intrinsic UDP-glucose in <i>Saccharomyces cerevisiae</i> ." <i>The FEBS journal</i> 273.12 (2006): 2645-2657.      |
| Solyc09g064820.1 | 2.26           | EID1-like F-box protein 3                      | EDL3      | Involved in the following processes: ABA-activated signaling pathway, regulation of seed germination, response to osmotic stress, response to salt stress, response to water deprivation, and meristem phase transition | Increased ABA-activated signaling; Increased regulation of seed germination; Promoted response to osmotic, salt, and water stress; Promoted transition from vegetative to reproductive phase in the meristem | Friso, Giulia, et al. "In-depth analysis of the thylakoid membrane proteome of <i>Arabidopsis thaliana</i> chloroplasts: new proteins, new functions, and a plastid proteome database." <i>The Plant Cell</i> 16.2 (2004): 478-499.               |
| Solyc07g053230.3 | 2.22           | transcription factor MYB15-like                | MYB15     | Transcription factor involved in cold-regulation of CBF genes and in freezing tolerance; Involved in drought and salt tolerance; Enhances ABA biosynthesis and signaling                                                | Promoted freezing, drought, and salt tolerance; Enhanced ABA biosynthesis and signaling                                                                                                                      | Agarwal, Manu, et al. "A R2R3 type MYB transcription factor is involved in the cold regulation of CBF genes and in acquired freezing tolerance." <i>Journal of Biological Chemistry</i> 281.49 (2006): 37636-37645.                               |
| Solyc02g088090.1 | 2.16           | probable calcium-binding protein CML30         | CML30     | Calcium sensor                                                                                                                                                                                                          | Promoted calcium sensing                                                                                                                                                                                     | Boonburapong, Bongkoj, and Teerapong Buaboocha. "Genome-wide identification and analyses of the rice calmodulin and related potential calcium sensor proteins." <i>BMC plant biology</i> 7.1 (2007): 4.                                           |
| Solyc03g082660.3 | 2.14           | molybdate-anion transporter                    | MFSD5     | Mediates high-affinity intracellular uptake of the rare oligo-element molybdenum                                                                                                                                        | Increased intracellular uptake of molybdenum                                                                                                                                                                 | Tejada-Jiménez, Manuel, Aurora Galván, and Emilio Fernández. "Algae and humans share a molybdate transporter." <i>Proceedings of the National Academy of Sciences</i> 108.16 (2011): 6420-6425.                                                   |
| Solyc04g081530.1 | 2.14           | DNAJ-like protein                              | T5J17.130 | ATP binding, heat shock protein binding, metal ion binding, unfolding protein binding                                                                                                                                   | N/A                                                                                                                                                                                                          | Mayer, Klaus, et al. "Sequence and analysis of chromosome 4 of the plant <i>Arabidopsis thaliana</i> ." <i>Nature</i> 402.6763 (1999): 769-777.                                                                                                   |
| Solyc03g116070.1 | 2.12           | mini zinc finger protein 3                     | MIF3      | Involved in integrating signals from multiple hormones by regulating the expression of specific genes; Promotes the formation of ectopic shoot meristems                                                                | Increased hormonal signaling; Promoted formation of ectopic shoot meristems                                                                                                                                  | Hu, Wei, Baomin Feng, and Hong Ma. "Ectopic expression of the <i>Arabidopsis</i> MINI ZINC FINGER1 and MIF3 genes induces shoot meristems on leaf margins." <i>Plant molecular biology</i> 76.1-2 (2011): 57-68.                                  |
| Solyc04g071400.3 | 2.12           | WAT1-related protein At1g43650-like isoform X2 | AT1G43650 | Transmembrane transporter activity                                                                                                                                                                                      | Increased transmembrane transporter                                                                                                                                                                          | Busov, Victor B., et al. "An auxin-inducible gene from loblolly pine ( <i>Pinus taeda</i> L.) is differentially expressed in mature and juvenile-phase shoots and encodes a putative transmembrane protein." <i>Planta</i> 218.6 (2004): 916-927. |

| TomatoID                | DE in Infected | NCBI Protein Name                                  | Gene ID      | Uniprot Description                                                                                                                                                                       | Putative Consequences for Infection                                                    | Citation                                                                                                                                                                                                                                                            |
|-------------------------|----------------|----------------------------------------------------|--------------|-------------------------------------------------------------------------------------------------------------------------------------------------------------------------------------------|----------------------------------------------------------------------------------------|---------------------------------------------------------------------------------------------------------------------------------------------------------------------------------------------------------------------------------------------------------------------|
| Solyc04g051360.3        | 2.09           | ethylene-responsive transcription factor ABR1-like | ABR1         | Negative regulator of the ABA signaling pathway involved in seed germination and in responses to stress                                                                                   | Increased ABA signaling; Increased response to stress and pathogenesis                 | Pandey, Girdhar K., et al. "ABR1, an APETALA2-domain transcription factor that functions as a repressor of ABA response in Arabidopsis." <i>Plant Physiology</i> 139.3 (2005): 1185-1193.                                                                           |
| Solyc04g076570.3        | 2.08           | protein CLT2, chloroplastic isoform X3             | CLT2         | Involved in thiol transport from the plastid to the cytosol; Transports glutathione and its precursor                                                                                     | Increased thiol transport; Increased transport of glutathione and its precursor        | Maughan, Spencer C., et al. "Plant homologs of the Plasmodium falciparum chloroquine-resistance transporter, PfCRT, are required for glutathione homeostasis and stress responses." <i>Proceedings of the National Academy of Sciences</i> 107.5 (2010): 2331-2336. |
| Solyc07g007870.3        | 2.06           | 12-oxophytodienoate reductase 3                    | OPR3         | Involved in the biosynthesis of JA and other oxylipin signaling molecules; Required for the spatial and temporal regulation of JA levels during dehiscence of anthers                     | Increased biosynthesis of JA and other oxylipin signaling molecules                    | Sanders, Paul M., et al. "The Arabidopsis DELAYED DEHISCENCE1 gene encodes an enzyme in the jasmonic acid synthesis pathway." <i>The Plant Cell</i> 12.7 (2000): 1041-1061.                                                                                         |
| Solyc10g006660.3        | 2.06           | calcium-binding protein KRP1                       | KRP1         | Potential calcium sensor                                                                                                                                                                  | Promoted calcium sensing; Promoted regulation of trichome morphogenesis                | Reddy, Vaka S., et al. "KIC, a novel Ca <sup>2+</sup> binding protein with one EF-hand motif, interacts with a microtubule motor protein and regulates trichome morphogenesis." <i>The Plant Cell</i> 16.1 (2004): 185-200.                                         |
| Solyc09g089930.2        | 2.04           | ethylene responsive element binding protein        | EREBP1       | Involved in defense response; Involved in ethylene-activated signaling pathway                                                                                                            | Increased defense response; Increased ethylene-responsive signaling                    | Horvath, Diana M., Dorothy J. Huang, and Nam-Hai Chua. "Four classes of salicylate-induced tobacco genes." <i>Molecular plant-microbe interactions</i> 11.9 (1998): 895-905.                                                                                        |
| Solyc12g036470.2        | 2.01           | transcription factor BEE 1-like                    | BEE1         | Positive regulator of brassinosteroid signaling                                                                                                                                           | Promoted brassinosteroid signaling                                                     | Friedrichsen, Danielle M., et al. "Three redundant brassinosteroid early response genes encode putative bHLH transcription factors required for normal growth." <i>Genetics</i> 162.3 (2002): 1445-1456.                                                            |
| <i>Solyc01g102640.2</i> | -2.00          | nuclear pore complex protein NUP98A-like           | NUP98A       | Structural constituent of nuclear pore; Necessary for mRNA transport from the nucleus and protein import into the nucleus; Required for photoperiodism; Required for constitutive defense | <i>Impaired mRNA transport; Impaired photoperiodism; Impaired constitutive defense</i> | "A putative nucleoporin 96 is required for both basal defense and constitutive resistance responses mediated by suppressor of npr1-1, constitutive 1."                                                                                                              |
| <i>Solyc03g097930.3</i> | -2.03          | potassium channel SKOR like                        | SKOR         | Involved in potassium release into the xylem sap toward the shoots; Interacts with the cytoskeleton or with regulatory proteins                                                           | <i>Impaired potassium transport</i>                                                    | Gaymard, Frédéric, et al. "Identification and disruption of a plant shaker-like outward channel involved in K <sup>+</sup> release into the xylem sap." <i>Cell</i> 94.5 (1998): 647-655.                                                                           |
| Solyc10g051020.2        | -2.04          | cytochrome P450 CYP72A219                          | LOC104242999 | Heme binding, iron ion binding, monooxygenase activity, acting on paired donors                                                                                                           | N/A                                                                                    | Sierro, Nicolas, et al. "Reference genomes and transcriptomes of <i>Nicotiana sylvestris</i> and <i>Nicotiana tomentosiformis</i> ." <i>Genome biology</i> 14.6 (2013): R60.                                                                                        |
| <i>Solyc11g010270.2</i> | -2.05          | homeobox-leucine zipper protein ATHB-6             | ATHB-6       | Acts as a growth regulator in response to water deficit; Involved in the negative regulation of the ABA signaling pathway                                                                 | <i>Impaired response to drought; Impaired regulation of ABA signaling</i>              | Himmelbach, Axel, et al. "Homeodomain protein ATHB6 is a target of the protein phosphatase ABI1 and regulates hormone responses in Arabidopsis." <i>The EMBO journal</i> 21.12 (2002): 3029-3038.                                                                   |

| TomatoID                | DE in Infected | NCBI Protein Name                                          | Gene ID  | Uniprot Description                                                                                                                   | Putative Consequences for Infection                                                                                                    | Citation                                                                                                                                                                                                                                                                                       |
|-------------------------|----------------|------------------------------------------------------------|----------|---------------------------------------------------------------------------------------------------------------------------------------|----------------------------------------------------------------------------------------------------------------------------------------|------------------------------------------------------------------------------------------------------------------------------------------------------------------------------------------------------------------------------------------------------------------------------------------------|
| <i>Solyc12g096490.1</i> | -2.05          | protein GLUTAMINE DUMPER 5-like                            | GDU5     | Involved in the regulation of the amino acid metabolism                                                                               | <i>Impaired amino acid transport; Impaired regulation of amino acid metabolism</i>                                                     | Pratelli, Réjane, et al. "Stimulation of nonselective amino acid export by glutamine dumper proteins." <i>Plant Physiology</i> 152.2 (2010): 762-773.                                                                                                                                          |
| <i>Solyc07g014620.1</i> | -2.11          | auxin-responsive protein SAUR50                            | SAUR50   | Effector of hormonal and environmental signals in plant growth                                                                        | <i>Impaired response to hormonal and environmental signaling; Impaired growth/development</i>                                          | Ren, Hong, and William M. Gray. "SAUR proteins as effectors of hormonal and environmental signals in plant growth." <i>Molecular plant</i> 8.8 (2015): 1153-1164.                                                                                                                              |
| <i>Solyc07g056280.3</i> | -2.11          | WRKY transcription factor 30                               | WRKY30   | Transcription factor involved in leaf senescence, response to hydrogen peroxide, response to ozone, and SA signaling pathway          | <i>Impaired leaf senescence; Impaired response to hydrogen peroxide; Impaired response to ozone; Impaired response to SA signaling</i> | El-Esawi, Mohamed A., et al. "Overexpression of AtWRKY30 transcription factor enhances heat and drought stress tolerance in wheat ( <i>Triticum aestivum</i> L.)." <i>Genes</i> 10.2 (2019): 163.                                                                                              |
| <i>Solyc02g084930.3</i> | -2.12          | abscisic acid 8'-hydroxylase 3-like                        | CYP707A3 | Involved in the oxidative degradation of ABA; Involved in the control of postgermination growth                                       | <i>Impaired degradation of ABA; Impaired postgermination growth</i>                                                                    | Umezawa, Taishi, et al. "CYP707A3, a major ABA 8'-hydroxylase involved in dehydration and rehydration response in <i>Arabidopsis thaliana</i> ." <i>The Plant Journal</i> 46.2 (2006): 171-182.                                                                                                |
| <i>Solyc12g036550.2</i> | -2.12          | Ycf1                                                       | Ycf1     | Part of an intermediate translocation complex acting as a protein-conducting channel at the inner chloroplast envelope                | <i>Decreased protein precursor import into chloroplasts</i>                                                                            | Kikuchi, Shingo, et al. "Uncovering the protein translocon at the chloroplast inner envelope membrane." <i>Science</i> 339.6119 (2013): 571-574.                                                                                                                                               |
| <i>Solyc01g100490.3</i> | -2.15          | nicotianamine synthase                                     | NAS1     | Synthesizes nicotianamine, a sensor for the physiological iron status within the plant; Involved in the transport of iron             | <i>Impaired iron transport</i>                                                                                                         | Weber, Michael, et al. "Comparative microarray analysis of <i>Arabidopsis thaliana</i> and <i>Arabidopsis halleri</i> roots identifies nicotianamine synthase, a ZIP transporter and other genes as potential metal hyperaccumulation factors." <i>The Plant Journal</i> 37.2 (2004): 269-281. |
| <i>Solyc10g054820.2</i> | -2.17          | aquaporin-5 isoform X2                                     | PIP2-5   | Water channel required to facilitate the transport of water across cell membrane                                                      | <i>Decreased water transport</i>                                                                                                       | Marmagne, Anne, et al. "Identification of new intrinsic proteins in <i>Arabidopsis</i> plasma membrane proteome." <i>Molecular &amp; Cellular Proteomics</i> 3.7 (2004): 675-691.                                                                                                              |
| <i>Solyc09g090360.3</i> | -2.22          | phosphate transporter PHO1                                 | PHO1     | Regulates Pi starvation responses; Involved in the transfer of Pi from roots to shoots; Involved in ABA induction of stomatal closure | <i>Impaired Pi starvation response; Impaired transfer of Pi from roots to shoots; Impaired ABA induction of stomatal closure</i>       | Stefanovic, Aleksandra, et al. "Members of the PHO1 gene family show limited functional redundancy in phosphate transfer to the shoot, and are regulated by phosphate deficiency via distinct pathways." <i>The Plant Journal</i> 50.6 (2007): 982-994.                                        |
| <i>Solyc02g011830.1</i> | -2.24          | Ycf1                                                       | Ycf1     | Part of an intermediate translocation complex acting as a protein-conducting channel at the inner chloroplast envelope                | <i>Decreased protein precursor import into chloroplasts</i>                                                                            | Kikuchi, Shingo, et al. "Uncovering the protein translocon at the chloroplast inner envelope membrane." <i>Science</i> 339.6119 (2013): 571-574.                                                                                                                                               |
| <i>Solyc11g021310.1</i> | -2.27          | Ycf1                                                       | Ycf1     | Part of an intermediate translocation complex acting as a protein-conducting channel at the inner chloroplast envelope                | <i>Decreased protein precursor import into chloroplasts</i>                                                                            | Kikuchi, Shingo, et al. "Uncovering the protein translocon at the chloroplast inner envelope membrane." <i>Science</i> 339.6119 (2013): 571-574.                                                                                                                                               |
| <i>Solyc05g049990.3</i> | -2.29          | heavy metal-associated isoprenylated plant protein 39-like | HIPP39   | Heavy metal-binding protein involved in metal ion transport                                                                           | <i>Impaired metal ion transport</i>                                                                                                    | Hanada, Kousuke, et al. "Functional compensation of primary and secondary metabolites by duplicate genes in <i>Arabidopsis thaliana</i> ." <i>Molecular biology and evolution</i> 28.1 (2011): 377-382.                                                                                        |

| TomatoID                | DE in Infected | NCBI Protein Name                                                    | Gene ID   | Uniprot Description                                                                                                                                                  | Putative Consequences for Infection                                                           | Citation                                                                                                                                                                                                                               |
|-------------------------|----------------|----------------------------------------------------------------------|-----------|----------------------------------------------------------------------------------------------------------------------------------------------------------------------|-----------------------------------------------------------------------------------------------|----------------------------------------------------------------------------------------------------------------------------------------------------------------------------------------------------------------------------------------|
| <i>Solyc04g058150.3</i> | -2.31          | metallothionein-like protein type 2 A                                | MT2A      | Functions as metal chelator of copper and Zn; Plays a role in Cu homeostasis                                                                                         | <i>Impaired copper homeostasis</i>                                                            | Guo, Woei-Jiun, Metha Meetam, and Peter B. Goldsbrough. "Examining the specific contributions of individual Arabidopsis metallothioneins to copper distribution and metal tolerance." <i>Plant physiology</i> 146.4 (2008): 1697-1706. |
| <i>Solyc08g075880.3</i> | -2.32          | heavy metal-associated isoprenylated plant protein 30-like           | HIPP30    | Involved in metal ion transport; Involved in response to drought stress                                                                                              | <i>Impaired metal ion transport; Impaired response to drought stress</i>                      | "Stress induced and nuclear localized HIPP26 from Arabidopsis thaliana interacts via its heavy metal associated domain with the drought stress related zinc finger transcription factor ATHB29."                                       |
| <i>Solyc11g006290.2</i> | -2.33          | 3-oxo-5-alpha-steroid 4-dehydrogenase 1                              | SRD5A1    | Involved in phytohormone signaling                                                                                                                                   | <i>Impaired phytohormone signaling</i>                                                        | Thieme, Christoph J., et al. "Endogenous Arabidopsis messenger RNAs transported to distant tissues." <i>Nature Plants</i> 1.4 (2015): 1-9.                                                                                             |
| <i>Solyc03g045070.1</i> | -2.44          | ammonium transporter 1 member 3                                      | AMT1-3    | Transporter involved in ammonium uptake from the soil; Contributes with AMT1-1 to the overall ammonium uptake capacity in roots under nitrogen-deficiency conditions | <i>Impaired ammonium uptake and transport; Impaired response to nitrogen-deficiency</i>       | Loqué, Dominique, et al. "Additive contribution of AMT1; 1 and AMT1; 3 to high-affinity ammonium uptake across the plasma membrane of nitrogen-deficient Arabidopsis roots." <i>The Plant Journal</i> 48.4 (2006): 522-534.            |
| <i>Solyc01g080870.3</i> | -2.51          | protein NRT1/ PTR FAMILY 7.3                                         | NPF7.3    | Low-affinity proton-dependent bidirectional nitrate transporter; Involved in nitrate loading into xylem                                                              | <i>Impaired nitrate transport</i>                                                             | Lin, Shan-Hua, et al. "Mutation of the Arabidopsis NRT1. 5 nitrate transporter causes defective root-to-shoot nitrate transport." <i>The Plant Cell</i> 20.9 (2008): 2514-2528.                                                        |
| <i>Solyc01g110580.2</i> | -2.55          | auxin-responsive protein SAUR50                                      | SAUR50    | Effector of hormonal and environmental signals in plant growth                                                                                                       | <i>Impaired response to hormonal and environmental signaling; Impaired growth/development</i> | Ren, Hong, and William M. Gray. "SAUR proteins as effectors of hormonal and environmental signals in plant growth." <i>Molecular plant</i> 8.8 (2015): 1153-1164.                                                                      |
| <i>Solyc11g012690.2</i> | -2.56          | heavy metal-associated isoprenylated plant protein 7-like isoform X2 | HIPP07    | Heavy metal-binding protein involved in metal ion transport                                                                                                          | <i>Impaired metal ion transport</i>                                                           | Dykema, Philip E., et al. "A new class of proteins capable of binding transition metals." <i>Plant molecular biology</i> 41.1 (1999): 139-150.                                                                                         |
| <i>Solyc12g087870.2</i> | -2.62          | purine permease 3-like                                               | PUP3      | Involved in transport of purine derivatives during pollen germination and tube elongation                                                                            | <i>Impaired transport of purine derivatives during pollen germination and tube elongation</i> | Bürkle, Lukas, et al. "Transport of cytokinins mediated by purine transporters of the PUP family expressed in phloem, hydathodes, and pollen of Arabidopsis." <i>The Plant Journal</i> 34.1 (2003): 13-26.                             |
| <i>Solyc05g012030.1</i> | -2.63          | protein BIG GRAIN 1-like E                                           | AT1G69160 | Involved in auxin transport; Regulator of the auxin signaling pathway                                                                                                | <i>Impaired auxin transport; Impaired regulation of auxin signaling</i>                       | Culligan, Kevin M., et al. "ATR and ATM play both distinct and additive roles in response to ionizing radiation." <i>The Plant Journal</i> 48.6 (2006): 947-961.                                                                       |
| <i>Solyc08g075570.3</i> | -2.72          | urea-proton symporter DUR3                                           | DUR3      | High-affinity urea-proton symporter involved in the active transport of urea across the plasma membrane into root cells                                              | <i>Impaired urea uptake and transport</i>                                                     | Liu, Lai-Hua, et al. "AtDUR3 encodes a new type of high-affinity urea/H <sup>+</sup> symporter in Arabidopsis." <i>The Plant Cell</i> 15.3 (2003): 790-800.                                                                            |

| TomatoID                | DE in Infected | NCBI Protein Name                                    | Gene ID | Uniprot Description                                                                                                                            | Putative Consequences for Infection                                                                              | Citation                                                                                                                                                                                                                                                                          |
|-------------------------|----------------|------------------------------------------------------|---------|------------------------------------------------------------------------------------------------------------------------------------------------|------------------------------------------------------------------------------------------------------------------|-----------------------------------------------------------------------------------------------------------------------------------------------------------------------------------------------------------------------------------------------------------------------------------|
| <i>Solyc05g047440.1</i> | -2.75          | Ycf1                                                 | Ycf1    | Part of an intermediate translocation complex acting as a protein-conducting channel at the inner chloroplastic envelope                       | <i>Decreased protein precursor import into chloroplasts</i>                                                      | Kikuchi, Shingo, et al. "Uncovering the protein translocon at the chloroplast inner envelope membrane." <i>Science</i> 339.6119 (2013): 571-574.                                                                                                                                  |
| <i>Solyc10g047390.1</i> | -2.92          | Ycf1                                                 | Ycf1    | Part of an intermediate translocation complex acting as a protein-conducting channel at the inner chloroplastic envelope                       | <i>Decreased protein precursor import into chloroplasts</i>                                                      | Kikuchi, Shingo, et al. "Uncovering the protein translocon at the chloroplast inner envelope membrane." <i>Science</i> 339.6119 (2013): 571-574.                                                                                                                                  |
| <i>Solyc09g008200.3</i> | -2.95          | heavy metal-associated isoprenylated plant protein 5 | HIPP05  | Heavy-metal-binding protein involved in metal ion transport; Involved in disease resistance                                                    | <i>Impaired metal ion transport; Impaired disease resistance</i>                                                 | Cooper, Bret, et al. "A network of rice genes associated with stress response and seed development." <i>Proceedings of the National Academy of Sciences</i> 100.8 (2003): 4945-4950.                                                                                              |
| <i>Solyc12g035550.1</i> | -3.21          | Ycf1                                                 | Ycf1    | Part of an intermediate translocation complex acting as a protein-conducting channel at the inner chloroplastic envelope                       | <i>Decreased protein precursor import into chloroplasts</i>                                                      | Kikuchi, Shingo, et al. "Uncovering the protein translocon at the chloroplast inner envelope membrane." <i>Science</i> 339.6119 (2013): 571-574.                                                                                                                                  |
| <i>Solyc08g079230.1</i> | -3.32          | 14 kDa proline-rich protein DC2.15-like              | N/A     | Involved with the initiation of embryogenesis or with the metabolic changes produced by the removal of auxins                                  | <i>Impaired embryogenesis; Impaired response to auxin signaling</i>                                              | Aleith, F., and G. Richter. "Gene expression during induction of somatic embryogenesis in carrot cell suspensions." <i>Planta</i> 183.1 (1991): 17-24.                                                                                                                            |
| <i>Solyc08g016000.1</i> | -3.35          | Ycf1                                                 | Ycf1    | Part of an intermediate translocation complex acting as a protein-conducting channel at the inner chloroplastic envelope                       | <i>Decreased protein precursor import into chloroplasts</i>                                                      | Kikuchi, Shingo, et al. "Uncovering the protein translocon at the chloroplast inner envelope membrane." <i>Science</i> 339.6119 (2013): 571-574.                                                                                                                                  |
| <i>Solyc07g006310.1</i> | -3.43          | transcription factor IBH1-like 1                     | IBL1    | Acts as transcriptional repressor that negatively regulates cell and organ elongation in response to gibberellin and brassinosteroid signaling | <i>Impaired regulation of cell and organ elongation in response to gibberellin and brassinosteroid signaling</i> | Zhiponova, Miroslava K., et al. "Helix-loop-helix/basic helix-loop-helix transcription factor network represses cell elongation in Arabidopsis through an apparent incoherent feed-forward loop." <i>Proceedings of the National Academy of Sciences</i> 111.7 (2014): 2824-2829. |
| <i>Solyc11g021300.1</i> | -3.62          | Ycf1                                                 | Ycf1    | Part of an intermediate translocation complex acting as a protein-conducting channel at the inner chloroplastic envelope                       | <i>Decreased protein precursor import into chloroplasts</i>                                                      | Kikuchi, Shingo, et al. "Uncovering the protein translocon at the chloroplast inner envelope membrane." <i>Science</i> 339.6119 (2013): 571-574.                                                                                                                                  |
| <i>Solyc11g021260.1</i> | -3.66          | Ycf1                                                 | Ycf1    | Part of an intermediate translocation complex acting as a protein-conducting channel at the inner chloroplastic envelope                       | <i>Decreased protein precursor import into chloroplasts</i>                                                      | Kikuchi, Shingo, et al. "Uncovering the protein translocon at the chloroplast inner envelope membrane." <i>Science</i> 339.6119 (2013): 571-574.                                                                                                                                  |
| <i>Solyc11g021290.2</i> | -3.91          | Ycf1                                                 | Ycf1    | Part of an intermediate translocation complex acting as a protein-conducting channel at the inner chloroplastic envelope                       | <i>Decreased protein precursor import into chloroplasts</i>                                                      | Kikuchi, Shingo, et al. "Uncovering the protein translocon at the chloroplast inner envelope membrane." <i>Science</i> 339.6119 (2013): 571-574.                                                                                                                                  |



| TomatoID                | DE in Infected | NCBI Protein Name | Gene ID | Uniprot Description                                                                                                      | Putative Consequences for Infection                         | Citation                                                                                                                                         |
|-------------------------|----------------|-------------------|---------|--------------------------------------------------------------------------------------------------------------------------|-------------------------------------------------------------|--------------------------------------------------------------------------------------------------------------------------------------------------|
| <i>Solyc10g049470.1</i> | -4.08          | Ycf1              | Ycf1    | Part of an intermediate translocation complex acting as a protein-conducting channel at the inner chloroplastic envelope | <i>Decreased protein precursor import into chloroplasts</i> | Kikuchi, Shingo, et al. "Uncovering the protein translocon at the chloroplast inner envelope membrane." <i>Science</i> 339.6119 (2013): 571-574. |
| <i>Solyc11g021280.1</i> | -4.23          | Ycf1              | Ycf1    | Part of an intermediate translocation complex acting as a protein-conducting channel at the inner chloroplastic envelope | <i>Decreased protein precursor import into chloroplasts</i> | Kikuchi, Shingo, et al. "Uncovering the protein translocon at the chloroplast inner envelope membrane." <i>Science</i> 339.6119 (2013): 571-574. |
| <i>Solyc11g021270.1</i> | -4.71          | Ycf1              | Ycf1    | Part of an intermediate translocation complex acting as a protein-conducting channel at the inner chloroplastic envelope | <i>Decreased protein precursor import into chloroplasts</i> | Kikuchi, Shingo, et al. "Uncovering the protein translocon at the chloroplast inner envelope membrane." <i>Science</i> 339.6119 (2013): 571-574. |
