# Supplementary material for: Effects of ‘Candidatus Liberibacter solanacearum’ haplotypes A and B on tomato gene expression and geotropism
Source: PubMed Central journal article supplement (PMC8966271; doi:10.1186/s12870-022-03505-z), 2022-03-30
Supplement: 12870_2022_3505_MOESM9_ESM.pdf [file 12870_2022_3505_MOESM9_ESM.pdf]

| TomatoID         | DE in Infected | NCBI Protein Name                                   | Gene ID   | Uniprot Description                                                                                                                                                                                                                                                                                      | Putative Consequences for Infection                                                                                                                                                                                           | Citation                                                                                                                                                                                                                                            |
|------------------|----------------|-----------------------------------------------------|-----------|----------------------------------------------------------------------------------------------------------------------------------------------------------------------------------------------------------------------------------------------------------------------------------------------------------|-------------------------------------------------------------------------------------------------------------------------------------------------------------------------------------------------------------------------------|-----------------------------------------------------------------------------------------------------------------------------------------------------------------------------------------------------------------------------------------------------|
| Solyc09g084450.3 | 6.67           | transcription factor bHLH92 isoform X1              | BHLH92    | Involved in regulation of transcription                                                                                                                                                                                                                                                                  | N/A                                                                                                                                                                                                                           | Jiang, Yuanqing, Bo Yang, and Michael K. Deyholos. "Functional characterization of the Arabidopsis bHLH92 transcription factor in abiotic stress." <i>Molecular Genetics and Genomics</i> 282.5 (2009): 503-516.                                    |
| Solyc01g006400.3 | 4.94           | Hop-interacting protein TH1101 precursor            | N/A       | Transcriptional activator                                                                                                                                                                                                                                                                                | N/A                                                                                                                                                                                                                           | N/A                                                                                                                                                                                                                                                 |
| Solyc06g076020.3 | 4.79           | heat shock cognate 70 kDa protein 1                 | HSP70-1   | Facilitates folding of de novo proteins, assists translocation of precursor proteins into organelles; Degrades damaged protein under stress conditions; Involved in defense response; Involved in protein transport to chloroplasts; Modulates stomatal aperture in response to environmental conditions | <i>Increased protein folding; Increased translocation of precursor proteins into organelles; Increased degradation of damaged proteins; Promoted defense response; Increased response to abiotic stress and ABA signaling</i> | Sung, Dong Yul, and Charles L. Guy. "Physiological and molecular assessment of altered expression of Hsc70-1 in Arabidopsis. Evidence for pleiotropic consequences." <i>Plant Physiology</i> 132.2 (2003): 979-987.                                 |
| Solyc04g077980.1 | 4.66           | C2H2-type zinc finger protein                       | At4g35610 | Transcription factor activity                                                                                                                                                                                                                                                                            | <i>Promoted transcription regulation</i>                                                                                                                                                                                      | Cheng, Chia-Yi, et al. "Araport11: a complete reannotation of the Arabidopsis thaliana reference genome." <i>The Plant Journal</i> 89.4 (2017): 789-804.                                                                                            |
| Solyc03g116890.3 | 4.56           | probable WRKY transcription factor 40 isoform X1    | WRKY40    | Transcription factor                                                                                                                                                                                                                                                                                     | N/A                                                                                                                                                                                                                           | Eulgem, Thomas, et al. "The WRKY superfamily of plant transcription factors." <i>Trends in plant science</i> 5.5 (2000): 199-206.                                                                                                                   |
| Solyc03g026280.3 | 3.80           | C-repeat-binding factor-1                           | CBF1      | Transcription factor                                                                                                                                                                                                                                                                                     | N/A                                                                                                                                                                                                                           | Zhen, Ying, and Mark C. Ungerer. "Relaxed selection on the CBF/DREB1 regulatory genes and reduced freezing tolerance in the southern range of Arabidopsis thaliana." <i>Molecular Biology and Evolution</i> 25.12 (2008): 2547-2555.                |
| Solyc02g087540.2 | 3.72           | AAA-ATPase At3g28510-like                           | AT3G28510 | Involved in inter-tissue RNA transport                                                                                                                                                                                                                                                                   | <i>Increased inter-tissue RNA transport</i>                                                                                                                                                                                   | Thieme, Christoph J., et al. "Endogenous Arabidopsis messenger RNAs transported to distant tissues." <i>Nature Plants</i> 1.4 (2015): 1-9.                                                                                                          |
| Solyc02g079590.3 | 3.62           | receptor-like serine/threonine-protein kinase SD1-8 | SD18      | Involved in the regulation of cellular expansion and differentiation                                                                                                                                                                                                                                     | <i>Increased regulation of cellular expansion and differentiation</i>                                                                                                                                                         | Ascencio-Ibáñez, José Trinidad, et al. "Global analysis of Arabidopsis gene expression uncovers a complex array of changes impacting pathogen response and cell cycle during geminivirus infection." <i>Plant physiology</i> 148.1 (2008): 436-454. |
| Solyc04g082140.3 | 3.52           | multicopper oxidase-like protein precursor          | LPR1      | Multicopper oxidase involved in Cu homeostasis and oxidative stress response; Necessary for root growth inhibition                                                                                                                                                                                       | <i>Promoted Cu homeostasis; Increased response to oxidative stress; Root growth inhibition</i>                                                                                                                                | Svistoonoff, Sergio, et al. "Root tip contact with low-phosphate media reprograms plant root architecture." <i>Nature genetics</i> 39.6 (2007): 792-796.                                                                                            |

| TomatoID                | DE in Infected | NCBI Protein Name                                                  | Gene ID   | Uniprot Description                                                                                                                                                                                                                      | Putative Consequences for Infection                                                                                                                                      | Citation                                                                                                                                                                                                                                            |
|-------------------------|----------------|--------------------------------------------------------------------|-----------|------------------------------------------------------------------------------------------------------------------------------------------------------------------------------------------------------------------------------------------|--------------------------------------------------------------------------------------------------------------------------------------------------------------------------|-----------------------------------------------------------------------------------------------------------------------------------------------------------------------------------------------------------------------------------------------------|
| <i>Solyc10g009270.3</i> | 3.50           | transcription factor MYC2-like                                     | MYC2      | Involved in the regulation of ABA-inducible genes under drought stress; Negative regulator of light-regulated gene expression and growth; Positive regulator of lateral root formation; Regulates sesquiterpene biosynthesis             | <i>Promoted response to drought; Impaired response to light-mediated expression; Promoted lateral root formation; Increased regulation of sesquiterpene biosynthesis</i> | Abe, Hiroshi, et al. "Role of Arabidopsis MYC and MYB homologs in drought- and abscisic acid-regulated gene expression." <i>The Plant Cell</i> 9.10 (1997): 1859-1868.                                                                              |
| <i>Solyc06g074030.1</i> | 3.26           | probable CCR4-associated factor 1 homolog 9                        | CAF1-9    | Ubiquitous transcription factor required for a diverse set of processes; Component of the CCR4 complex involved in the control of gene expression                                                                                        | <i>Promoted gene expression</i>                                                                                                                                          | Chang, Shuang, and Craig S. Pikaard. "Transcript profiling in Arabidopsis reveals complex responses to global inhibition of DNA methylation and histone deacetylation." <i>Journal of Biological Chemistry</i> 280.1 (2005): 796-804.               |
| <i>Solyc12g005450.1</i> | 3.07           | probable receptor-like protein kinase At4g10390                    | AT4G10390 | Involved in protein phosphorylation; Involved in response to wounding                                                                                                                                                                    | <i>Increased protein phosphorylation; Promoted response to wounding</i>                                                                                                  | Peng, Mingsheng, et al. "Genome-wide analysis of Arabidopsis responsive transcriptome to nitrogen limitation and its regulation by the ubiquitin ligase gene NLA." <i>Plant molecular biology</i> 65.6 (2007): 775-797.                             |
| <i>Solyc07g006570.3</i> | 2.99           | ribonuclease 3-like                                                | RTL1      | Involved in production of siRNA involved in RNA interference                                                                                                                                                                             | <i>Increased gene silencing</i>                                                                                                                                          | Charbonnel, Cyril, et al. "The siRNA suppressor RTL1 is redox-regulated through glutathionylation of a conserved cysteine in the double-stranded-RNA-binding domain." <i>Nucleic acids research</i> 45.20 (2017): 11891-11907.                      |
| <i>Solyc01g057770.3</i> | 2.80           | boron transporter 1 isoform X1                                     | BOR1      | Efflux-type boron transporter for xylem loading Boron is essential for maintaining the integrity of plants cell walls                                                                                                                    | <i>Promoted boron homeostasis; Promoted plant cell wall development and integrity</i>                                                                                    | Noguchi, Kyotaro, et al. "bor1-1, an Arabidopsis thaliana mutant that requires a high level of boron." <i>Plant Physiology</i> 115.3 (1997): 901-906.                                                                                               |
| <i>Solyc08g008280.3</i> | 2.73           | probable WRKY transcription factor 53                              | WRKY53    | Transcription factor regulating the early events of leaf senescence; Negatively regulates the expression of ESR/ESP; Promotes resistance to certain pathogens by enhancing SA- dependent genes; Contributes to the suppression of PDF1.2 | <i>Down regulation of ESR/ESP; Promoted resistance to certain pathogens by enhancing SA- dependent genes; Suppression of PDF1.2</i>                                      | Miao, Ying, and Ulrike Zentgraf. "The antagonist function of Arabidopsis WRKY53 and ESR/ESP in leaf senescence is modulated by the jasmonic and salicylic acid equilibrium." <i>The Plant Cell</i> 19.3 (2007): 819-830.                            |
| <i>Solyc09g018250.2</i> | 2.63           | GBF-interacting protein 1-like isoform X1                          | GIP1      | Contributes to bZIP-mediated gene regulation; Acts as negative co-regulator in red and blue light-mediated hypocotyl elongation                                                                                                          | <i>Promoted gene regulation; Increased seed germination</i>                                                                                                              | Sehnke, Paul C., et al. "Identification and characterization of GIP1, an Arabidopsis thaliana protein that enhances the DNA binding affinity and reduces the oligomeric state of G-box binding factors." <i>Cell research</i> 15.8 (2005): 567-575. |
| <i>Solyc06g075010.3</i> | 2.53           | ruBisCO large subunit-binding protein subunit alpha, chloroplastic | N/A       | Involved in protein refolding                                                                                                                                                                                                            | N/A                                                                                                                                                                      | N/A                                                                                                                                                                                                                                                 |
| <i>Solyc07g018010.3</i> | 2.43           | transcription factor bHLH35                                        | BHLH35    | Involved in regulation of transcription                                                                                                                                                                                                  | N/A                                                                                                                                                                      | Heim, Marc A., et al. "The basic helix-loop-helix transcription factor family in plants: a genome-wide study of protein structure and functional diversity." <i>Molecular biology and evolution</i> 20.5 (2003): 735-747.                           |

| TomatoID         | DE in Infected | NCBI Protein Name                                | Gene ID   | Uniprot Description                                                                                                                                                                       | Putative Consequences for Infection                                                                                        | Citation                                                                                                                                                                                                                                                 |
|------------------|----------------|--------------------------------------------------|-----------|-------------------------------------------------------------------------------------------------------------------------------------------------------------------------------------------|----------------------------------------------------------------------------------------------------------------------------|----------------------------------------------------------------------------------------------------------------------------------------------------------------------------------------------------------------------------------------------------------|
| Solyc07g062700.3 | 2.43           | sodium/calcium exchanger NCL                     | NCL       | Participates in the maintenance of calcium homeostasis; Plays a role in auxin response, diurnal rhythm, and flowering time; Involved in salt stress response                              | <i>Promoted calcium homeostasis; Increased response to auxin; Promoted circadian rhythm; Promoted salt stress response</i> | Wang, Peng, et al. "A Na <sup>+</sup> /Ca <sup>2+</sup> exchanger-like protein (ATNCL) involved in salt stress in Arabidopsis." <i>Journal of Biological Chemistry</i> 287.53 (2012): 44062-44070.                                                       |
| Solyc01g086800.3 | 2.36           | histone H3.2                                     | HTR2      | Core component of the nucleosome; Plays central roles in transcription regulation, DNA repair, DNA replication and chromosomal stability                                                  | <i>Increased transcription regulation and DNA repair</i>                                                                   | Seki, Motoaki, et al. "Functional annotation of a full-length Arabidopsis cDNA collection." <i>Science</i> 296.5565 (2002): 141-145.                                                                                                                     |
| Solyc05g007490.3 | 2.11           | probable methyltransferase PMT2                  | AT1G26850 | Involved in methylation                                                                                                                                                                   | N/A                                                                                                                        | Ascencio-Ibáñez, José Trinidad, et al. "Global analysis of Arabidopsis gene expression uncovers a complex array of changes impacting pathogen response and cell cycle during geminivirus infection." <i>Plant physiology</i> 148.1 (2008): 436-454.      |
| Solyc01g079600.3 | 2.09           | phospholipase A1 PLIP2, chloroplastic isoform X1 | PLIP2     | Catalyzes the initial step of oxylipins and jasmonate biosynthesis; Links ABA-mediated abiotic stress responses and oxylipin and jasmonate signaling pathways                             | <i>Increased jasmonate biosynthesis; Increased jasmonate signaling crosstalk</i>                                           | Wang, Kun, et al. "Two abscisic acid-responsive plastid lipase genes involved in jasmonic acid biosynthesis in Arabidopsis thaliana." <i>The Plant Cell</i> 30.5 (2018): 1006-1022.                                                                      |
| Solyc01g080600.3 | 2.06           | histone H3.2                                     | HTR2      | Core component of the nucleosome; Plays central roles in transcription regulation, DNA repair/replication, and chromosomal stability                                                      | <i>Increased transcription regulation and DNA repair</i>                                                                   | Seki, Motoaki, et al. "Functional annotation of a full-length Arabidopsis cDNA collection." <i>Science</i> 296.5565 (2002): 141-145.                                                                                                                     |
| Solyc08g075870.3 | 2.05           | probable methyltransferase PMT21                 | ERD3      | Involved in methylation                                                                                                                                                                   | N/A                                                                                                                        | Ascencio-Ibáñez, José Trinidad, et al. "Global analysis of Arabidopsis gene expression uncovers a complex array of changes impacting pathogen response and cell cycle during geminivirus infection." <i>Plant physiology</i> 148.1 (2008): 436-454.      |
| Solyc05g050560.1 | 2.04           | transcription factor bHLH13-like                 | BHLH13    | Involved in negative regulation of gene expression                                                                                                                                        | N/A                                                                                                                        | Borsics, Tamás, et al. "The cyclic nucleotide-gated calmodulin-binding channel AtCNGC10 localizes to the plasma membrane and influences numerous growth responses and starch accumulation in Arabidopsis thaliana." <i>Planta</i> 225.3 (2007): 563-573. |
| Solyc01g107390.3 | 2.02           | indole-3-acetic acid-amido synthetase GH3.2      | GH3.2     | Catalyzes the synthesis of indole-3-acetic acid-amino acid conjugates, providing a mechanism for the plant to cope with the presence of excess auxin                                      | <i>Promoted auxin homeostasis</i>                                                                                          | Hilson, Pierre, et al. "Versatile gene-specific sequence tags for Arabidopsis functional genomics: transcript profiling and reverse genetics applications." <i>Genome research</i> 14.10b (2004): 2176-2189.                                             |
| Solyc01g102640.2 | -2.00          | nuclear pore complex protein NUP98A-like         | NUP98A    | Structural constituent of nuclear pore; Necessary for mRNA transport from the nucleus and protein import into the nucleus; Required for photoperiodism; Required for constitutive defense | Impaired mRNA transport; Impaired photoperiodism; Impaired constitutive defense                                            | "A putative nucleoporin 96 is required for both basal defense and constitutive resistance responses mediated by suppressor of npr1-1, constitutive 1."                                                                                                   |

| TomatoID         | DE in Infected | NCBI Protein Name                                 | Gene ID      | Uniprot Description                                                                                                                                                                        | Putative Consequences for Infection                                                                                                  | Citation                                                                                                                                                                                            |
|------------------|----------------|---------------------------------------------------|--------------|--------------------------------------------------------------------------------------------------------------------------------------------------------------------------------------------|--------------------------------------------------------------------------------------------------------------------------------------|-----------------------------------------------------------------------------------------------------------------------------------------------------------------------------------------------------|
| Solyc08g068490.3 | -2.09          | indole-3-acetic acid-amido synthetase GH3.10-like | GH3.10       | Catalyzes the synthesis of indole-3-acetic acid-amino acid conjugates, providing a mechanism for the plant to cope with the presence of excess auxin                                       | Impaired auxin homeostasis                                                                                                           | Takase, Tomoyuki, et al. "DFL2, a new member of the Arabidopsis GH3 gene family, is involved in red light-specific hypocotyl elongation." <i>Plant and Cell Physiology</i> 44.10 (2003): 1071-1080. |
| Solyc04g007210.3 | -2.13          | zinc finger protein CONSTANS-LIKE 16              | COL16        | Involved in regulation of transcription                                                                                                                                                    | N/A                                                                                                                                  | Khanna, Rajnish, et al. "The Arabidopsis B-box zinc finger family." <i>The Plant Cell</i> 21.11 (2009): 3416-3420.                                                                                  |
| Solyc11g069700.2 | -2.14          | elongation factor 1-alpha                         | A1           | Promotes the GTP-dependent binding of aminoacyl-tRNA to the A-site of ribosomes during protein biosynthesis                                                                                | Impaired binding of aminoacyl-tRNA to the A-site of ribosomes during protein biosynthesis                                            | Lahmy, Sylvie, et al. "DOMINO1, a member of a small plant-specific gene family, encodes a protein essential for nuclear and nucleolar functions." <i>The Plant Journal</i> 39.6 (2004): 809-820.    |
| Solyc06g060830.3 | -2.17          | homeobox-leucine zipper protein HAT4              | HAT4         | Involved in the negative regulation of cell elongation and specific cell proliferation processes; Mediator of the red/far-red light effects on leaf cell expansion in the shading response | Impaired regulation of cell elongation; Impaired regulation of lateral root formation and vascular system; Impaired shading response | Schena, Mark, Alan M. Lloyd, and Ronald W. Davis. "The HAT4 gene of Arabidopsis encodes a developmental regulator." <i>Genes &amp; development</i> 7.3 (1993): 367-379.                             |
| Solyc10g080920.2 | -2.19          | protein RADIALIS-like 1                           | RL1          | Transcription factor                                                                                                                                                                       | N/A                                                                                                                                  | Cheng, Chia-Yi, et al. "Araport11: a complete reannotation of the Arabidopsis thaliana reference genome." <i>The Plant Journal</i> 89.4 (2017): 789-804.                                            |
| Solyc07g066330.3 | -2.20          | NAC domain-containing protein 21/22 isoform X2    | LOC107784013 | Involved in regulation of transcription                                                                                                                                                    | Impaired regulation of transcription                                                                                                 | Sierro, Nicolas, et al. "The tobacco genome sequence and its comparison with those of tomato and potato." <i>Nature communications</i> 5.1 (2014): 1-9.                                             |
| Solyc01g007810.1 | -2.37          | transcription repressor OFP15                     | OFP15        | Transcriptional repressor that regulates multiple aspects of plant growth and development                                                                                                  | Promoted plant growth and development; Impaired regulation of plant growth and development                                           | Wang, Shucui, et al. "Arabidopsis ovate family proteins, a novel transcriptional repressor family, control multiple aspects of plant growth and development." <i>PLoS One</i> 6.8 (2011): e23896.   |
| Solyc01g112190.3 | -2.41          | protein NLP2                                      | NLP2         | Transcription factor                                                                                                                                                                       | N/A                                                                                                                                  | Konishi, Mineko, and Shuichi Yanagisawa. "Arabidopsis NIN-like transcription factors have a central role in nitrate signalling." <i>Nature communications</i> 4.1 (2013): 1-9.                      |
| Solyc05g007880.3 | -2.46          | cyclic dof factor 1 isoform X1                    | CDF1         | Regulates a photoperiodic flowering response; Transcriptional repressor of 'CONSTANS' expression                                                                                           | Impaired photoperiodic flowering response; Decreased repression of CONSTANS expression                                               | Imaizumi, Takato, et al. "FKF1 F-box protein mediates cyclic degradation of a repressor of CONSTANS in Arabidopsis." <i>Science</i> 309.5732 (2005): 293-297.                                       |
| Solyc11g008530.2 | -2.48          | endoribonuclease Dicer 2d isoform X1              | AT3G03300    | Plays an essential role in transitive silencing of transgenes by processing secondary siRNAs; Plays a role in antiviral RNA silencing                                                      | Impaired post-transcriptional gene silencing; Impaired defense against viral pathogens                                               | "DICER-LIKE2 plays a primary role in transitive silencing of transgenes in Arabidopsis."                                                                                                            |
| Solyc01g049690.3 | -2.51          | transcription factor Pur-alpha 1 isoform X2       | PURA1        | Transcription factor that specifically binds the purine-rich double-stranded telomeric repeated sequence                                                                                   | Impaired gene expression                                                                                                             | Tremousaygue, Dominique, et al. "Plant interstitial telomere motifs participate in the control of gene expression in root meristems." <i>The Plant Journal</i> 20.5 (1999): 553-561.                |
| Solyc05g041360.2 | -2.65          | maturase K                                        | matK         | Assists in splicing its own and other chloroplast group II introns                                                                                                                         | Impaired chloroplastic gene splicing                                                                                                 | Sato, Shusei, et al. "Complete structure of the chloroplast genome of Arabidopsis thaliana." <i>DNA research</i> 6.5 (1999): 283-290.                                                               |

| TomatoID         | DE in Infected | NCBI Protein Name               | Gene ID | Uniprot Description                                                | Putative Consequences for Infection  | Citation                                                                                                                                                 |
|------------------|----------------|---------------------------------|---------|--------------------------------------------------------------------|--------------------------------------|----------------------------------------------------------------------------------------------------------------------------------------------------------|
| Solyc11g073120.2 | -2.66          | transcription factor            | MYB48   | Transcriptional regulator                                          | N/A                                  | Riechmann, José Luis, et al. "Arabidopsis transcription factors: genome-wide comparative analysis among                                                  |
| Solyc09g061390.1 | -2.66          | maturase K                      | matK    | Assists in splicing its own and other chloroplast group II introns | Impaired chloroplastic gene splicing | Sato, Shusei, et al. "Complete structure of the chloroplast genome of Arabidopsis thaliana." DNA research 6.5 (1999): 283-290.                           |
| Solyc06g005330.3 | -2.71          | transcription factor MYB48-like | MYB48   | Transcriptional regulator                                          | N/A                                  | Riechmann, José Luis, et al. "Arabidopsis transcription factors: genome-wide comparative analysis among eukaryotes." Science 290.5499 (2000): 2105-2110. |
| Solyc06g005320.1 | -3.02          | transcription factor MYB48-like | MYB48   | Transcriptional regulator                                          | N/A                                  | Riechmann, José Luis, et al. "Arabidopsis transcription factors: genome-wide comparative analysis among eukaryotes." Science 290.5499 (2000): 2105-2110. |
| Solyc06g005310.3 | -3.70          | transcription factor MYB48-like | MYB48   | Transcriptional regulator                                          | N/A                                  | Riechmann, José Luis, et al. "Arabidopsis transcription factors: genome-wide comparative analysis among eukaryotes." Science 290.5499 (2000): 2105-2110. |
