# Supplementary material for: Effects of ‘Candidatus Liberibacter solanacearum’ haplotypes A and B on tomato gene expression and geotropism
Source: PubMed Central journal article supplement (PMC8966271; doi:10.1186/s12870-022-03505-z), 2022-03-30
Supplement: 12870_2022_3505_MOESM10_ESM.pdf [file 12870_2022_3505_MOESM10_ESM.pdf]

| TomatoID         | DE    | NCBI Protein Name                                          | Gene ID      | Uniprot Description                                                                                       | Putative Consequences for Infection                                                           | Citation                                                                                                                                                                                                                                                                                      |
|------------------|-------|------------------------------------------------------------|--------------|-----------------------------------------------------------------------------------------------------------|-----------------------------------------------------------------------------------------------|-----------------------------------------------------------------------------------------------------------------------------------------------------------------------------------------------------------------------------------------------------------------------------------------------|
| Solyc11g027710.1 | -6.40 | N/A                                                        | N/A          | N/A                                                                                                       | N/A                                                                                           | N/A                                                                                                                                                                                                                                                                                           |
| Solyc09g089530.3 | -5.65 | proteinase inhibitor 1-like                                | N/A          | N/A                                                                                                       | N/A                                                                                           | N/A                                                                                                                                                                                                                                                                                           |
| Solyc12g096780.2 | -4.69 | enoyl-[acyl-carrier-protein] reductase, mitochondrial-like | AT3G45770    | Catalyzes the NADPH-dependent reduction of trans-2-enoyl thioesters in mitochondrial fatty acid synthesis | Decreased fatty acid synthesis and metabolism                                                 | Li-Beisson, Yonghua, et al. "Acyl-lipid metabolism." The Arabidopsis book/American Society of Plant Biologists 11 (2013).                                                                                                                                                                     |
| Solyc09g089520.3 | -4.23 | proteinase inhibitor I-B-like                              | LOC107794480 | Involved in response to wounding                                                                          | <i>Impaired response to wounding</i>                                                          | Sierra, Nicolas, et al. "The tobacco genome sequence and its comparison with those of tomato and potato." Nature communications 5.1 (2014): 1-9.                                                                                                                                              |
| Solyc11g071480.1 | -3.83 | agmatine hydroxycinnamoyltransferase 1-like                | AHT1         | Promotes the synthesis of hydroxycinnamic acid amides, which play a role in defense against pathogens     | <i>Impaired defense against pathogens</i>                                                     | Chen, Wei, et al. "Genome-wide association analyses provide genetic and biochemical insights into natural variation in rice metabolism." Nature genetics 46.7 (2014): 714-721.                                                                                                                |
| Solyc09g008670.3 | -3.65 | threonine deaminase                                        | N/A          | Involved in cellular amino acid biosynthetic process                                                      | N/A                                                                                           | Tieman, Denise M., and Avtar K. Handa. "Molecular cloning and characterization of genes expressed during early tomato ( <i>Lycopersicon esculentum</i> Mill.) fruit development by mRNA differential display." Journal of the American Society for Horticultural Science 121.1 (1996): 52-56. |
| Solyc09g084450.3 | -3.42 | transcription factor bHLH92 isoform X1                     | BHLH92       | Involved in regulation of transcription                                                                   | N/A                                                                                           | Jiang, Yuanqing, Bo Yang, and Michael K. Deyholos. "Functional characterization of the Arabidopsis bHLH92 transcription factor in abiotic stress." Molecular Genetics and Genomics 282.5 (2009): 503-516.                                                                                     |
| Solyc08g074620.3 | -3.40 | phenol oxidase E, chloroplastic                            | N/A          | Involved in pigment biosynthesis process                                                                  | <i>Impaired pigment biosynthesis</i>                                                          | Shahar, Tamar, Nava Hennig, Tamar Gutfinger, Dana Hareven, and Eliezer Lifschitz. "The tomato 66.3-kD polyphenoloxidase gene: molecular identification and developmental expression." The Plant Cell 4, no. 2 (1992): 135-147.                                                                |
| Solyc01g006400.3 | -3.08 | Hop-interacting protein THI101 precursor                   | N/A          | Transcriptional activator                                                                                 | N/A                                                                                           | N/A                                                                                                                                                                                                                                                                                           |
| Solyc03g083770.1 | -2.89 | 21 kDa protein                                             | HSP21        | N/A                                                                                                       | N/A                                                                                           | N/A                                                                                                                                                                                                                                                                                           |
| Solyc09g089540.3 | -2.82 | wound-induced proteinase inhibitor 1-like                  | N/A          | Inhibits both chymotrypsin and trypsin                                                                    | Impaired serine protease activity                                                             | Richardson, M., and L. Cossins. "Chymotryptic inhibitor I from potatoes: the amino acid sequences of subunits B, C and D." FEBS letters 45, no. 1-2 (1974): 11-13.                                                                                                                            |
| Solyc01g073695.1 | -2.82 | N/A                                                        | N/A          | N/A                                                                                                       | N/A                                                                                           | N/A                                                                                                                                                                                                                                                                                           |
| Solyc12g010030.2 | -2.80 | leucine aminopeptidase 2, chloroplastic isoform X1         | LAP2         | Involved in the processing and regular turnover of intracellular proteins; Heat shock protein             | <i>Impaired turnover of intracellular proteins; Impaired response to heat-induced damaged</i> | Waditee-Sirisattha, Rungaroon, et al. "The Arabidopsis aminopeptidase LAP2 regulates plant growth, leaf longevity and stress response." New Phytologist 191.4 (2011): 958-969.                                                                                                                |

| TomatoID                | DE    | NCBI Protein Name                               | Gene ID | Uniprot Description                                                                                                                                                        | Putative Consequences for Infection                                                                      | Citation                                                                                                                                                                                                                                                                                        |
|-------------------------|-------|-------------------------------------------------|---------|----------------------------------------------------------------------------------------------------------------------------------------------------------------------------|----------------------------------------------------------------------------------------------------------|-------------------------------------------------------------------------------------------------------------------------------------------------------------------------------------------------------------------------------------------------------------------------------------------------|
| Solyc07g008570.3        | -2.75 | probable inactive purple acid phosphatase 27    | PAP27   | Acid phosphatase activity; Metal ion binding                                                                                                                               | N/A                                                                                                      | Cheng, Chia-Yi, et al. "Araport11: a complete reannotation of the Arabidopsis thaliana reference genome." <i>The Plant Journal</i> 89.4 (2017): 789-804.                                                                                                                                        |
| Solyc12g010020.2        | -2.71 | leucine aminopeptidase 1, chloroplastic         | LAPA1   | Involved in the processing and regular turnover of intracellular proteins                                                                                                  | Impaired intracellular protein turnover                                                                  | Pautot, Veronique, et al. "Leucine aminopeptidase: an inducible component of the defense response in <i>Lycopersicon esculentum</i> (tomato)." <i>Proceedings of the National Academy of Sciences</i> 90.21 (1993): 9906-9910.                                                                  |
| Solyc12g010025.1        | -2.70 | N/A                                             | N/A     | N/A                                                                                                                                                                        | N/A                                                                                                      | N/A                                                                                                                                                                                                                                                                                             |
| Solyc07g055720.3        | -2.69 | uncharacterized protein LOC101259555 isoform X2 | N/A     | N/A                                                                                                                                                                        | N/A                                                                                                      | N/A                                                                                                                                                                                                                                                                                             |
| Solyc00g187050.3        | -2.68 | leucine aminopeptidase 1, chloroplastic         | LAPA1   | Involved in the processing and regular turnover of intracellular proteins                                                                                                  | Impaired intracellular protein turnover                                                                  | Pautot, Veronique, et al. "Leucine aminopeptidase: an inducible component of the defense response in <i>Lycopersicon esculentum</i> (tomato)." <i>Proceedings of the National Academy of Sciences</i> 90.21 (1993): 9906-9910.                                                                  |
| <i>Solyc01g090180.3</i> | -2.64 | 4,5-DOPA dioxygenase extradiol                  | DODA    | Opens the cyclic ring of dihydroxy-phenylalanine, producing betalamic acid                                                                                                 | <i>Impaired betalamic acid production; Impaired pigment production</i>                                   | Christinet, Laurent, et al. "Characterization and functional identification of a novel plant 4, 5-extradiol dioxygenase involved in betalain pigment biosynthesis in <i>Portulaca grandiflora</i> ." <i>Plant Physiology</i> 134.1 (2004): 265-274.                                             |
| <i>Solyc06g009190.3</i> | -2.60 | pectinesterase                                  | PME1    | Acts in the modification of cell walls via demethylesterification of cell wall pectin; Acts as negative regulators of genes involved in salt stress response               | <i>Impaired cell wall modification; Impaired response to salt stress</i>                                 | Creighton, Maria T., Anna Kolton, Amr RA Kataya, Jodi Maple-Grødem, Irina O. Averkina, Behzad Heidari, and Cathrine Lillo. "Methylation of protein phosphatase 2A—Influence of regulators and environmental stress factors." <i>Plant, cell &amp; environment</i> 40, no. 10 (2017): 2347-2358. |
| <i>Solyc06g083130.3</i> | -2.55 | dCTP pyrophosphatase 1                          | DCTPP1  | Hydrolyzes dNTPs to the corresponding nucleoside monophosphates; Protects DNA/RNA against the incorporation of these genotoxic nucleotide analogs through their catabolism | <i>Impaired DNA/RNA protection against genotoxic nucleotide analogs</i>                                  | Cheng, Chia-Yi, et al. "Araport11: a complete reannotation of the Arabidopsis thaliana reference genome." <i>The Plant Journal</i> 89.4 (2017): 789-804.                                                                                                                                        |
| <i>Solyc01g091170.3</i> | -2.54 | Arginase 2, chloroplastic/mitochondrial         | ARGAH2  | Utilized in the urea cycle; Precursor for the synthesis of both polyamines and proline; Catalyzes the formation of putrescine from agmatine                                | <i>Impaired jasmonate-related functions; Impaired urea waste management; Impaired freezing tolerance</i> | Dombrecht, Bruno, et al. "MYC2 differentially modulates diverse jasmonate-dependent functions in Arabidopsis." <i>The Plant Cell</i> 19.7 (2007): 2225-2245.                                                                                                                                    |
| Solyc05g005535.1        | -2.53 | N/A                                             | N/A     | N/A                                                                                                                                                                        | N/A                                                                                                      | N/A                                                                                                                                                                                                                                                                                             |
| <i>Solyc10g079350.2</i> | -2.52 | zeatin O-glucosyltransferase-like               | ZOG1    | Regulates cytokinin activity and storage; Impacts seed growth                                                                                                              | <i>Impaired cellular division and plant growth in roots and shoots; Impaired reproductive investment</i> | Hou, Bingkai, et al. "N-glucosylation of cytokinins by glycosyltransferases of Arabidopsis thaliana." <i>Journal of Biological Chemistry</i> 279.46 (2004): 47822-47832.                                                                                                                        |

| TomatoID         | DE    | NCBI Protein Name                          | Gene ID   | Uniprot Description                                                                                            | Putative Consequences for Infection                                   | Citation                                                                                                                                                                                                                                                                                                                                                                                     |
|------------------|-------|--------------------------------------------|-----------|----------------------------------------------------------------------------------------------------------------|-----------------------------------------------------------------------|----------------------------------------------------------------------------------------------------------------------------------------------------------------------------------------------------------------------------------------------------------------------------------------------------------------------------------------------------------------------------------------------|
| Solyc00g145170.2 | -2.49 | proteinase inhibitor type-2 precursor      | N/A       | N/A                                                                                                            | N/A                                                                   | Balandin, Teresa, et al. "Structure and induction pattern of a novel proteinase inhibitor class II gene of tobacco." <i>Plant molecular biology</i> 27.6 (1995): 1197-1204.                                                                                                                                                                                                                  |
| Solyc07g008380.2 | -2.48 | salutaridinol 7-O-acetyltransferase-like   | SALAT     | Involved in biosynthesis of morphinan-type benzyloisoquinoline alkaloids                                       | Impaired biosynthesis of morphinan-type benzyloisoquinoline alkaloids | Lenz, Rainer, and Meinhart H. Zenk. "Acetyl coenzyme A: salutaridinol-7-O-acetyltransferase from <i>Papaver somniferum</i> plant cell cultures: The enzyme catalyzing the formation of thebaine in morphine biosynthesis." <i>Journal of Biological Chemistry</i> 270.52 (1995): 31091-31096.                                                                                                |
| Solyc07g064600.3 | -2.36 | inducible plastid-lipid associated protein | CHRD      | Involved in organonitrogen compound catabolic process                                                          | N/A                                                                   | N/A                                                                                                                                                                                                                                                                                                                                                                                          |
| Solyc06g083470.3 | -2.32 | tropinone reductase homolog At5g06060      | At5g06060 | Has oxidoreductase activity                                                                                    | <i>Decreased oxidoreductase activity</i>                              | Ciftci-Yilmaz, Sultan, Mustafa R. Morsy, Luhua Song, Alicia Coutu, Beth A. Krizek, Michael W. Lewis, Daniel Warren, John Cushman, Erin L. Connolly, and Ron Mittler. "The EAR-motif of the Cys2/His2-type zinc finger protein Zat7 plays a key role in the defense response of <i>Arabidopsis</i> to salinity stress." <i>Journal of Biological Chemistry</i> 282, no. 12 (2007): 9260-9268. |
| Solyc06g083480.3 | -2.32 | tropinone reductase homolog At5g06060      | At5g06060 | Has oxidoreductase activity                                                                                    | <i>Decreased oxidoreductase activity</i>                              | Ciftci-Yilmaz, Sultan, Mustafa R. Morsy, Luhua Song, Alicia Coutu, Beth A. Krizek, Michael W. Lewis, Daniel Warren, John Cushman, Erin L. Connolly, and Ron Mittler. "The EAR-motif of the Cys2/His2-type zinc finger protein Zat7 plays a key role in the defense response of <i>Arabidopsis</i> to salinity stress." <i>Journal of Biological Chemistry</i> 282, no. 12 (2007): 9260-9268. |
| Solyc06g006000.3 | -2.28 | uncharacterized protein LOC101264428       | N/A       | N/A                                                                                                            | N/A                                                                   | N/A                                                                                                                                                                                                                                                                                                                                                                                          |
| Solyc02g089350.3 | -2.26 | protein GAST1 precursor                    | GAST1     | Involved in root-specific abscisic acid-signaling regulation                                                   | <i>Impaired abscisic acid-signaling regulation</i>                    | Shi, Lifang, Robert T. Gast, Manjula Gopalraj, and Neil E. Olszewski. "Characterization of a shoot-specific, GA3-and ABA-regulated gene from tomato." <i>The Plant Journal</i> 2, no. 2 (1992): 153-159.                                                                                                                                                                                     |
| Solyc01g005300.3 | -2.25 | adagio protein 3                           | ADO3      | Component of an E3 ubiquitin ligase complex that plays a central role in blue light-dependent circadian cycles | <i>Impaired E3 ubiquitination; Accumulation of misfolded proteins</i> | Fornara, Fabio, Kishore CS Panigrahi, Lionel Gissot, Nicolas Sauerbrunn, Mark Rühl, José A. Jarillo, and George Coupland. "Arabidopsis DOF transcription factors act redundantly to reduce CONSTANS expression and are essential for a photoperiodic flowering response." <i>Developmental cell</i> 17, no. 1 (2009): 75-86.                                                                 |
| Solyc03g123410.1 | -2.24 | auxin-binding protein ABP19a               | ABP19A    | Receptor for the plant growth-promoting hormone auxin                                                          | <i>Impaired auxin signaling</i>                                       | Ohmiya, Akemi, Yoshiyuki Tanaka, Koh-ichi Kadowaki, and Tateki Hayashi. "Cloning of genes encoding auxin-binding proteins (ABP19/20) from peach: significant peptide sequence similarity with germin-like proteins." <i>Plant and cell physiology</i> 39, no. 5 (1998): 492-499.                                                                                                             |

| TomatoID                | DE    | NCBI Protein Name                                                             | Gene ID   | Uniprot Description                                                                                                                            | Putative Consequences for Infection                                      | Citation                                                                                                                                                                                                                                                                                                                                                                         |
|-------------------------|-------|-------------------------------------------------------------------------------|-----------|------------------------------------------------------------------------------------------------------------------------------------------------|--------------------------------------------------------------------------|----------------------------------------------------------------------------------------------------------------------------------------------------------------------------------------------------------------------------------------------------------------------------------------------------------------------------------------------------------------------------------|
| <i>Solyc11g066390.2</i> | -2.23 | superoxide dismutase [Cu-Zn], chloroplastic                                   | CSD2      | Processes reactive oxygen species which are normally produced within the cells; Mediates tolerance to stress, including photo-oxidative stress | <i>Impaired photo-oxidative stress response</i>                          | Abarca, Dolores, Marta Roldán, Mercedes Martín, and Bartolomé Sabater. "Arabidopsis thaliana ecotype Cvi shows an increased tolerance to photo-oxidative stress and contains a new chloroplastic copper/zinc superoxide dismutase isoenzyme." <i>Journal of experimental botany</i> 52, no. 360 (2001): 1417-1425.                                                               |
| <i>Solyc10g009150.3</i> | -2.22 | organ-specific protein S2                                                     | N/A       | N/A                                                                                                                                            | N/A                                                                      | Williams, Mary E., John Mundy, Steven A. Kay, and Nam-Hai Chua. "Differential expression of two related organ-specific genes in pea." <i>Plant molecular biology</i> 14, no. 5 (1990): 765-774.                                                                                                                                                                                  |
| <i>Solyc03g098300.1</i> | -2.22 | ornithine decarboxylase-like                                                  | ODC       | Catalyzes the first and rate-limiting step of polyamine biosynthesis; Polyamines are essential for cell proliferation                          | <i>Impaired polyamine biosynthesis; Impaired cell proliferation</i>      | Alabadi, David, and Juan Carbonell. "Expression of ornithine decarboxylase is transiently increased by pollination, 2, 4-dichlorophenoxyacetic acid, and gibberellic acid in tomato ovaries." <i>Plant physiology</i> 118, no. 1 (1998): 323-328.                                                                                                                                |
| <i>Solyc05g007830.3</i> | -2.19 | expansin-A1                                                                   | EXPA1     | Causes loosening and extension of plant cell walls by disrupting non-covalent bonding between cellulose microfibrils and matrix glucans        | <i>Impaired plant cell wall extension</i>                                | Zhang, Xiu-Qing, Peng-Cheng Wei, Yan-Mei Xiong, Yi Yang, Jia Chen, and Xue-Chen Wang. "Overexpression of the Arabidopsis $\alpha$ -expansin gene AtEXPA1 accelerates stomatal opening by decreasing the volumetric elastic modulus." <i>Plant cell reports</i> 30, no. 1 (2011): 27-36.                                                                                          |
| <i>Solyc07g042390.2</i> | -2.17 | plant invertase/pectin methylesterase inhibitor superfamily protein precursor | At3g17140 | Has enzyme inhibitor activity                                                                                                                  | <i>Impaired enzyme inhibition</i>                                        | Johnston, Amal J., Patrick Meier, Jacqueline Gheyselinck, Samuel EJ Wuest, Michael Federer, Edith Schlagenhauf, Jörg D. Becker, and Ueli Grossniklaus. "Genetic subtraction profiling identifies genes essential for Arabidopsis reproduction and reveals interaction between the female gametophyte and the maternal sporophyte." <i>Genome biology</i> 8, no. 10 (2007): 1-21. |
| <i>Solyc08g067530.1</i> | -2.16 | non-specific lipid-transfer protein 1-like                                    | LTP1      | Plays a role in wax or cutin deposition in the cell walls of expanding epidermal cells and certain secretory tissues                           | <i>Impaired wax/cutin deposition; Impaired plant cell wall expansion</i> | Skriver, Karen, Robert Leah, Frieder Müller-Uri, Finn-Lok Olsen, and John Mundy. "Structure and expression of the barley lipid transfer protein gene <i>Ltp1</i> ." <i>Plant molecular biology</i> 18, no. 3 (1992): 585-589.                                                                                                                                                    |
| <i>Solyc12g015690.2</i> | -2.14 | fasciclin-like arabinogalactan protein 1                                      | FLA1      | Cell surface adhesion protein; Involved in root and shoot development                                                                          | <i>Impaired root/shoot development</i>                                   | Sultana, Nighat, Hannah V. Florance, Alex Johns, and Nicholas Smirnoff. "Ascorbate deficiency influences the leaf cell wall glycoproteome in <i>A. thaliana</i> ." <i>Plant, cell &amp; environment</i> 38, no. 2 (2015): 375-384.                                                                                                                                               |
| <i>Solyc01g005290.3</i> | -2.13 | fasciclin-like arabinogalactan protein 1                                      | FLA1      | Cell surface adhesion protein; Involved in root and shoot development                                                                          | <i>Impaired root/shoot development</i>                                   | Sultana, Nighat, Hannah V. Florance, Alex Johns, and Nicholas Smirnoff. "Ascorbate deficiency influences the leaf cell wall glycoproteome in <i>A. thaliana</i> ." <i>Plant, cell &amp; environment</i> 38, no. 2 (2015): 375-384.                                                                                                                                               |
| <i>Solyc01g017490.1</i> | -2.12 | N/A                                                                           | N/A       | N/A                                                                                                                                            | N/A                                                                      | N/A                                                                                                                                                                                                                                                                                                                                                                              |

| TomatoID                | DE    | NCBI Protein Name                                | Gene ID | Uniprot Description                                                                                                                                                         | Putative Consequences for Infection                     | Citation                                                                                                                                                                                                                                                                                                                                                           |
|-------------------------|-------|--------------------------------------------------|---------|-----------------------------------------------------------------------------------------------------------------------------------------------------------------------------|---------------------------------------------------------|--------------------------------------------------------------------------------------------------------------------------------------------------------------------------------------------------------------------------------------------------------------------------------------------------------------------------------------------------------------------|
| <i>Solyc03g120990.3</i> | -2.09 | NADP-dependent malic enzyme, chloroplastic       | ME6     | Cecarboxylates malate shuttled from neighboring mesophyll cells; CO2 released is refixed by RuBisCo; Eliminates the photorespiratory loss of CO2 that occurs in most plants | <i>Impaired photorespiratory efficiency of CO2 loss</i> | Cheng, Yuxiang, et al. "Expression, purification, and characterization of two NADP-malic enzymes of rice ( <i>Oryza sativa</i> L.) in <i>Escherichia coli</i> ." Protein expression and purification 45.1 (2006): 200-205.                                                                                                                                         |
| <i>Solyc11g027645.1</i> | -2.09 | N/A                                              | N/A     | N/A                                                                                                                                                                         | N/A                                                     | N/A                                                                                                                                                                                                                                                                                                                                                                |
| <i>Solyc03g118780.3</i> | -2.04 | thaumatin-like protein                           | TLP1    | Involved in local responses of roots to colonization by non-pathogenic plant growth-promoting rhizobacteria fluorescent <i>Pseudomonas</i> spp.                             | <i>Impaired rhizobacterial integration</i>              | Leon-Kloosterziel, Karen M., Bas WM Verhagen, Joost JB Keurentjes, Johan A. Van Pelt, Martijn Rep, L. C. Van Loon, and Corne MJ Pieterse. "Colonization of the Arabidopsis rhizosphere by fluorescent <i>Pseudomonas</i> spp. activates a root-specific, ethylene-responsive PR-5 gene in the vascular bundle." Plant molecular biology 57, no. 5 (2005): 731-748. |
| <i>Solyc00g068980.2</i> | -2.04 | N/A                                              | N/A     | N/A                                                                                                                                                                         | N/A                                                     | N/A                                                                                                                                                                                                                                                                                                                                                                |
| <i>Solyc07g008410.3</i> | -2.01 | protein DETOXIFICATION 29-like                   | DTX29   | Xenobiotic transmembrane transporter activity                                                                                                                               | <i>Impaired detoxification</i>                          | Hanada, Kousuke, et al. "Functional compensation of primary and secondary metabolites by duplicate genes in <i>Arabidopsis thaliana</i> ." Molecular biology and evolution 28.1 (2011): 377-382.                                                                                                                                                                   |
| <i>Solyc02g076730.2</i> | -1.98 | low-temperature-induced cysteine proteinase-like | N/A     | Proteolysis involved in cellular protein catabolic process                                                                                                                  | Impaired protein catabolism                             | Bar-Ziv, Amalia, Yael Levy, Hagit Hak, Anahit Mett, Eduard Belausov, Vitaly Citovsky, and Yedidya Gafni. "The Tomato yellow leaf curl virus (TYLCV) V2 protein interacts with the host papain-like cysteine protease CYP1." Plant signaling & behavior 7, no. 8 (2012): 983-989.                                                                                   |
| <i>Solyc01g096220.3</i> | -1.98 | ras-related protein RABA3                        | RABA3   | Involved in intracellular vesicle trafficking and protein transport                                                                                                         | <i>Impaired intracellular vesicle trafficking</i>       | Lunn, Daniel, Sanyasi R. Gaddipati, Gregory A. Tucker, and Grantley W. Lycett. "Null mutants of individual RABA genes impact the proportion of different cell wall components in stem tissue of <i>Arabidopsis thaliana</i> ." PLoS One 8, no. 10 (2013): e75724.                                                                                                  |
| <i>Solyc12g039030.1</i> | -1.97 | photosystem II protein D1                        | psbA    | Photosynthetic electron transporter in photosystem II                                                                                                                       | <i>Impaired photosynthesis</i>                          | Tsunoyama, Yuichi, Yoko Ishizaki, Kazuya Morikawa, Maki Kobori, Yoichi Nakahira, Go Takeba, Yoshinori Toyoshima, and Takashi Shiina. "Blue light-induced transcription of plastid-encoded psbD gene is mediated by a nuclear-encoded transcription initiation factor, AtSig5." Proceedings of the National Academy of Sciences 101, no. 9 (2004): 3304-3309.       |
| <i>Solyc01g060085.1</i> | -1.96 | N/A                                              | N/A     | N/A                                                                                                                                                                         | N/A                                                     | N/A                                                                                                                                                                                                                                                                                                                                                                |
| <i>Solyc01g017050.1</i> | -1.95 | N/A                                              | N/A     | N/A                                                                                                                                                                         | N/A                                                     | N/A                                                                                                                                                                                                                                                                                                                                                                |

| TomatoID         | DE    | NCBI Protein Name                                             | Gene ID | Uniprot Description                                                                                                                                                          | Putative Consequences for Infection                                  | Citation                                                                                                                                                                                                                                                                                                                                                     |
|------------------|-------|---------------------------------------------------------------|---------|------------------------------------------------------------------------------------------------------------------------------------------------------------------------------|----------------------------------------------------------------------|--------------------------------------------------------------------------------------------------------------------------------------------------------------------------------------------------------------------------------------------------------------------------------------------------------------------------------------------------------------|
| Solyc05g016120.2 | -1.95 | photosystem II protein D1                                     | psbA    | Photosynthetic electron transporter in photosystem II                                                                                                                        | <b>Impaired photosynthesis</b>                                       | Tsunoyama, Yuichi, Yoko Ishizaki, Kazuya Morikawa, Maki Kobori, Yoichi Nakahira, Go Takeba, Yoshinori Toyoshima, and Takashi Shiina. "Blue light-induced transcription of plastid-encoded psbD gene is mediated by a nuclear-encoded transcription initiation factor, AtSig5." Proceedings of the National Academy of Sciences 101, no. 9 (2004): 3304-3309. |
| Solyc11g039860.2 | -1.95 | N/A                                                           | N/A     | N/A                                                                                                                                                                          | N/A                                                                  | N/A                                                                                                                                                                                                                                                                                                                                                          |
| Solyc00g011150.1 | -1.94 | N/A                                                           | N/A     | N/A                                                                                                                                                                          | N/A                                                                  | N/A                                                                                                                                                                                                                                                                                                                                                          |
| Solyc01g048590.2 | -1.93 | photosystem II protein D1                                     | psbA    | Photosynthetic electron transporter in photosystem II                                                                                                                        | <i>Impaired photosynthesis</i>                                       | Tsunoyama, Yuichi, Yoko Ishizaki, Kazuya Morikawa, Maki Kobori, Yoichi Nakahira, Go Takeba, Yoshinori Toyoshima, and Takashi Shiina. "Blue light-induced transcription of plastid-encoded psbD gene is mediated by a nuclear-encoded transcription initiation factor, AtSig5." Proceedings of the National Academy of Sciences 101, no. 9 (2004): 3304-3309. |
| Solyc09g008320.3 | -1.92 | probable xyloglucan endotransglucosylase/hydrolase protein 32 | XTH32   | Cleaves and religates xyloglucan polymers, an essential constituent of the primary cell wall, and thereby participates in cell wall construction of growing tissues          | <i>Impaired plant cell wall construction</i>                         | Bischoff, Volker, Sarah Jane Cookson, Shuang Wu, and Wolf-Rüdiger Scheible. "Thaxtomin A affects CESA-complex density, expression of cell wall genes, cell wall composition, and causes ectopic lignification in Arabidopsis thaliana seedlings." Journal of experimental botany 60, no. 3 (2009): 955-965.                                                  |
| Solyc03g081240.3 | -1.92 | two-component response regulator-like APRR5                   | APRR5   | Transcriptional repressor of CCA1 and LHY, thereby controlling photoperiodic flowering response; Involved in the positive and negative feedback loops of the circadian clock | Impaired photoperiodic flowering response; Disrupted circadian clock | Matsushika, Akinori, Seiya Makino, Masaya Kojima, and Takeshi Mizuno. "Circadian waves of expression of the APRR1/TOC1 family of pseudo-response regulators in Arabidopsis thaliana: insight into the plant circadian clock." Plant and Cell Physiology 41, no. 9 (2000): 1002-1012.                                                                         |
| Solyc05g005550.3 | -1.92 | polygalacturonase non-catalytic subunit AroGP2 precursor      | GP2     | Non-catalytic subunit of polygalacturonase involved in cell wall organization                                                                                                | <i>Impaired plant cell wall organization</i>                         | N/A                                                                                                                                                                                                                                                                                                                                                          |
| Solyc07g048090.2 | -1.90 | fasciclin-like arabinogalactan protein 2                      | FLA2    | Cell surface adhesion protein                                                                                                                                                | N/A                                                                  | Sibout, Richard, Aymeric Eudes, Gregory Mouille, Brigitte Pollet, Catherine Lapiere, Lise Jouanin, and Armand Séguin. "CINNAMYL ALCOHOL DEHYDROGENASE-C and-D are the primary genes involved in lignin biosynthesis in the floral stem of Arabidopsis." The Plant Cell 17, no. 7 (2005): 2059-2076.                                                          |
| Solyc07g048085.1 | -1.90 | N/A                                                           | N/A     | N/A                                                                                                                                                                          | N/A                                                                  | N/A                                                                                                                                                                                                                                                                                                                                                          |
| Solyc01g097000.3 | -1.89 | uncharacterized protein LOC101254239                          | N/A     | N/A                                                                                                                                                                          | N/A                                                                  | N/A                                                                                                                                                                                                                                                                                                                                                          |

| TomatoID         | DE    | NCBI Protein Name                                              | Gene ID   | Uniprot Description                                                                                                                                                             | Putative Consequences for Infection                                                                        | Citation                                                                                                                                                                                                                                                                                    |
|------------------|-------|----------------------------------------------------------------|-----------|---------------------------------------------------------------------------------------------------------------------------------------------------------------------------------|------------------------------------------------------------------------------------------------------------|---------------------------------------------------------------------------------------------------------------------------------------------------------------------------------------------------------------------------------------------------------------------------------------------|
| Solyc08g063090.2 | -1.89 | acyl-lipid (9-3)-desaturase                                    | DES6      | Required for the biosynthesis of arachidonic acid                                                                                                                               | Impaired arachidonic acid biosynthesis                                                                     | Girke, Thomas, Hermann Schmidt, Ulrich Zähringer, Ralf Reski, and Ernst Heinz. "Identification of a novel D6-acyl-group desaturase by targeted gene disruption in <i>Physcomitrella patens</i> ." <i>The Plant Journal</i> 15, no. 1 (1998): 39-48.                                         |
| Solyc04g054990.3 | -1.88 | PLAT domain-containing protein 2                               | PLAT2     | Involved in response to abiotic stress                                                                                                                                          | <i>Impaired response to abiotic stress</i>                                                                 | Giacomelli, Lisa, Andrea Rudella, and Klaas Jan van Wijk. "High light response of the thylakoid proteome in <i>Arabidopsis</i> wild type and the ascorbate-deficient mutant <i>vtc2-2</i> . A comparative proteomics study." <i>Plant Physiology</i> 141.2 (2006): 685-701.                 |
| Solyc02g076740.2 | -1.88 | N/A                                                            | N/A       | N/A                                                                                                                                                                             | N/A                                                                                                        | N/A                                                                                                                                                                                                                                                                                         |
| Solyc04g063210.3 | -1.88 | probable caffeoyl-CoA O-methyltransferase At4g26220 isoform X2 | AT4G26220 | Plays a role in the synthesis of feruloylated polysaccharides; Involved in the reinforcement of the plant cell wall; Involved in response to wounding and/or pathogen challenge | <i>Impaired reinforcement of plant cell walls; Impaired response to wounding and/or pathogen challenge</i> | Meyermans, Hugo, et al. "Modifications in lignin and accumulation of phenolic glucosides in poplar xylem upon down-regulation of caffeoyl-coenzyme A O-methyltransferase, an enzyme involved in lignin biosynthesis." <i>Journal of Biological Chemistry</i> 275.47 (2000): 36899-36909.    |
| Solyc01g058500.3 | -1.87 | uncharacterized protein LOC101254183                           | N/A       | N/A                                                                                                                                                                             | N/A                                                                                                        | N/A                                                                                                                                                                                                                                                                                         |
| Solyc00g009760.2 | -1.87 | uncharacterized protein LOC101246232                           | N/A       | N/A                                                                                                                                                                             | N/A                                                                                                        | N/A                                                                                                                                                                                                                                                                                         |
| Solyc02g076750.2 | -1.86 | low-temperature-induced cysteine proteinase-like               | N/A       | Proteolysis involved in cellular protein catabolic process                                                                                                                      | Impaired protein catabolism                                                                                | Bar-Ziv, Amalia, Yael Levy, Hagit Hak, Anahit Mett, Eduard Belausov, Vitaly Citovsky, and Yedidya Gafni. "The Tomato yellow leaf curl virus (TYLCV) V2 protein interacts with the host papain-like cysteine protease CYP1." <i>Plant signaling &amp; behavior</i> 7, no. 8 (2012): 983-989. |
| Solyc00g012430.1 | -1.86 | N/A                                                            | N/A       | N/A                                                                                                                                                                             | N/A                                                                                                        | N/A                                                                                                                                                                                                                                                                                         |
| Solyc00g012440.1 | -1.86 | uncharacterized protein LOC101246232                           | N/A       | N/A                                                                                                                                                                             | N/A                                                                                                        | N/A                                                                                                                                                                                                                                                                                         |
| Solyc06g024210.2 | -1.86 | uncharacterized protein LOC101254183                           | N/A       | N/A                                                                                                                                                                             | N/A                                                                                                        | N/A                                                                                                                                                                                                                                                                                         |
| Solyc00g068970.2 | -1.85 | uncharacterized protein LOC101246232                           | N/A       | N/A                                                                                                                                                                             | N/A                                                                                                        | N/A                                                                                                                                                                                                                                                                                         |
| Solyc11g027760.1 | -1.85 | uncharacterized protein LOC104645327                           | N/A       | N/A                                                                                                                                                                             | N/A                                                                                                        | N/A                                                                                                                                                                                                                                                                                         |
| Solyc00g011160.2 | -1.85 | N/A                                                            | N/A       | N/A                                                                                                                                                                             | N/A                                                                                                        | N/A                                                                                                                                                                                                                                                                                         |

| TomatoID         | DE    | NCBI Protein Name                                        | Gene ID   | Uniprot Description                                                                                                                                     | Putative Consequences for Infection                                          | Citation                                                                                                                                                                                                                                                                                                                                                            |
|------------------|-------|----------------------------------------------------------|-----------|---------------------------------------------------------------------------------------------------------------------------------------------------------|------------------------------------------------------------------------------|---------------------------------------------------------------------------------------------------------------------------------------------------------------------------------------------------------------------------------------------------------------------------------------------------------------------------------------------------------------------|
| Solyc10g052470.1 | -1.85 | SANT/MYB domain protein                                  | At4g02210 | Has DNA binding activity                                                                                                                                | N/A                                                                          | Jen, Chih-Hung, Ioannis Michalopoulos, David R. Westhead, and Peter Meyer. "Natural antisense transcripts with coding capacity in Arabidopsis may have a regulatory role that is not linked to double-stranded RNA degradation." <i>Genome biology</i> 6, no. 6 (2005): 1-10.                                                                                       |
| Solyc06g051940.3 | -1.85 | protein phosphatase 2C                                   | PP2CA     | Major negative regulator of abscisic acid responses during seed germination and cold acclimation; Prevents stomata closure                              | <i>Impaired abscisic acid signaling responses; Promoted stomatal opening</i> | Chérel, Isabelle, et al. "Physical and functional interaction of the Arabidopsis K <sup>+</sup> channel AKT2 and phosphatase AtPP2CA." <i>The Plant Cell</i> 14.5 (2002): 1133-1146.                                                                                                                                                                                |
| Solyc11g019910.1 | -1.84 | pectinesterase inhibitor 4                               | PMEI4     | Pectin methylesterase inhibitor that can target the root-expressed PME17; Regulates de-methylesterification of pectins in roots and affects root growth | <i>Impaired root growth</i>                                                  | Sénéchal, Fabien, Alain Mareck, Paulo Marcelo, Patrice Lerouge, and Jérôme Pelloux. "Arabidopsis PME17 activity can be controlled by pectin methylesterase inhibitor4." <i>Plant signaling &amp; behavior</i> 10, no. 2 (2015): e983351.                                                                                                                            |
| Solyc02g070540.3 | -1.84 | carbohydrate binding domain-containing protein precursor | N/A       | N/A                                                                                                                                                     | N/A                                                                          | N/A                                                                                                                                                                                                                                                                                                                                                                 |
| Solyc00g008580.1 | -1.84 | N/A                                                      | N/A       | N/A                                                                                                                                                     | N/A                                                                          | N/A                                                                                                                                                                                                                                                                                                                                                                 |
| Solyc11g051200.1 | -1.82 | N/A                                                      | N/A       | N/A                                                                                                                                                     | N/A                                                                          | N/A                                                                                                                                                                                                                                                                                                                                                                 |
| Solyc03g118120.3 | -1.81 | uncharacterized protein At4g14100                        | N/A       | N/A                                                                                                                                                     | N/A                                                                          | N/A                                                                                                                                                                                                                                                                                                                                                                 |
| Solyc11g027770.1 | -1.81 | N/A                                                      | N/A       | N/A                                                                                                                                                     | N/A                                                                          | N/A                                                                                                                                                                                                                                                                                                                                                                 |
| Solyc06g050315.1 | -1.81 | N/A                                                      | N/A       | N/A                                                                                                                                                     | N/A                                                                          | N/A                                                                                                                                                                                                                                                                                                                                                                 |
| Solyc06g050320.3 | -1.81 | high mobility group B protein 7 isoform X1               | HMGB7     | Required for karyogamy during female gametophyte development, when the two polar nuclei fuse to form the diploid central cell nucleus                   | <i>Impaired female gametophyte development</i>                               | Grasser, Klaus D., Simon Grill, Meg Duroux, Dorte Launholt, Malene S. Thomsen, Birthe V. Nielsen, Hanne K. Nielsen, and Thomas Merkle. "HMGB6 from Arabidopsis thaliana specifies a novel type of plant chromosomal HMGB protein." <i>Biochemistry</i> 43, no. 5 (2004): 1309-1314.                                                                                 |
| Solyc10g048060.1 | -1.80 | N/A                                                      | N/A       | N/A                                                                                                                                                     | N/A                                                                          | N/A                                                                                                                                                                                                                                                                                                                                                                 |
| Solyc11g044620.1 | -1.80 | N/A                                                      | N/A       | N/A                                                                                                                                                     | N/A                                                                          | N/A                                                                                                                                                                                                                                                                                                                                                                 |
| Solyc11g056340.1 | -1.80 | photosystem II protein D1                                | psbA      | Photosynthetic electron transporter in photosystem II                                                                                                   | <i>Impaired photosynthesis</i>                                               | Tsunoyama, Yuichi, Yoko Ishizaki, Kazuya Morikawa, Maki Kobori, Yoichi Nakahira, Go Takeba, Yoshinori Toyoshima, and Takashi Shiina. "Blue light-induced transcription of plastid-encoded psbD gene is mediated by a nuclear-encoded transcription initiation factor, AtSig5." <i>Proceedings of the National Academy of Sciences</i> 101, no. 9 (2004): 3304-3309. |
| Solyc07g063733.1 | -1.79 | N/A                                                      | N/A       | N/A                                                                                                                                                     | N/A                                                                          | N/A                                                                                                                                                                                                                                                                                                                                                                 |



| TomatoID         | DE    | NCBI Protein Name                                                | Gene ID   | Uniprot Description                                                                                          | Putative Consequences for Infection                                   | Citation                                                                                                                                                                                                                                                                                                                                                                  |
|------------------|-------|------------------------------------------------------------------|-----------|--------------------------------------------------------------------------------------------------------------|-----------------------------------------------------------------------|---------------------------------------------------------------------------------------------------------------------------------------------------------------------------------------------------------------------------------------------------------------------------------------------------------------------------------------------------------------------------|
| Solyc12g005430.1 | -1.79 | acetyl-CoA-benzylalcohol acetyltransferase                       | At3g30280 | Has transferase activity                                                                                     | N/A                                                                   | Cheng, Chia-Yi, Vivek Krishnakumar, Agnes P. Chan, Françoise Thibaud-Nissen, Seth Schobel, and Christopher D. Town. "Araport11: a complete reannotation of the Arabidopsis thaliana reference genome." The Plant Journal 89, no. 4 (2017): 789-804.                                                                                                                       |
| Solyc10g078920.2 | -1.77 | thioredoxin-like 3-1, chloroplastic                              | WCRKC1    | Thiol-disulfide oxidoreductase that participates in various redox reactions                                  | N/A                                                                   | Cain, Peter, Michael Hall, Wolfgang P. Schröder, Thomas Kieselbach, and Colin Robinson. "A novel extended family of stromal thioredoxins." Plant molecular biology 70, no. 3 (2009): 273-281.                                                                                                                                                                             |
| Solyc07g045440.1 | -1.76 | fasciclin-like arabinogalactan protein 2                         | FLA2      | Cell surface adhesion protein                                                                                | N/A                                                                   | Sibout, Richard, Aymerick Eudes, Gregory Mouille, Brigitte Pollet, Catherine Lapierre, Lise Jouanin, and Armand Séguin. "CINNAMYL ALCOHOL DEHYDROGENASE-C and-D are the primary genes involved in lignin biosynthesis in the floral stem of Arabidopsis." The Plant Cell 17, no. 7 (2005): 2059-2076.                                                                     |
| Solyc00g010525.1 | -1.75 | N/A                                                              | N/A       | N/A                                                                                                          | N/A                                                                   | N/A                                                                                                                                                                                                                                                                                                                                                                       |
| Solyc02g082260.3 | -1.75 | 3-hydroxy-3-methylglutaryl-coenzyme A reductase 1                | HMG1      | Catalyzes the synthesis of mevalonate, the specific precursor of all isoprenoid compounds present in plants  | <i>Impaired synthesis of isoprenoids</i>                              | Dale, Susan, et al. "Bacterial expression of the catalytic domain of 3-hydroxy-3-methylglutaryl-coa reductase (isoform HMGR1) from Arabidopsis thaliana, and its inactivation by phosphorylation at Ser577 by Brassica oleracea 3-hydroxy-3-methylglutaryl-CoA reductase kinase." European Journal of Biochemistry 233.2 (1995): 506-513.                                 |
| Solyc04g081890.1 | -1.75 | E3 ubiquitin-protein ligase ATL23                                | ATL23     | E3 ubiquitin-protein ligase able to catalyze polyubiquitination with ubiquitin-conjugating enzymes           | <i>Impaired E3 ubiquitination; Accumulation of misfolded proteins</i> | Kraft, E., Stone, S.L., Ma, L., Su, N., Gao, Y., Lau, O.S., Deng, X.W. and Callis, J., 2005. Genome analysis and functional characterization of the E2 and RING-type E3 ligase ubiquitination enzymes of Arabidopsis. Plant physiology, 139(4), pp.1597-1611.                                                                                                             |
| Solyc01g111570.3 | -1.75 | probable receptor-like serine/threonine-protein kinase At5g57670 | At5g57670 | Has protein serine and threonine kinase activity                                                             | Impaired serine and threonine kinase activities                       | Dal Bosco, Cristina, Lina Lezhneva, Alexander Biehl, Dario Leister, Heinrich Strotmann, Gerd Wanner, and Jörg Meurer. "Inactivation of the chloroplast ATP synthase $\gamma$ subunit results in high non-photochemical fluorescence quenching and altered nuclear gene expression in Arabidopsis thaliana." Journal of Biological Chemistry 279, no. 2 (2004): 1060-1069. |
| Solyc12g057060.2 | -1.75 | 7-deoxyloganetin glucosyltransferase-like                        | N/A       | Iridoid glucosyltransferase acting exclusively on 7-deoxyloganetin; Involved in the synthesis of secologanin | Increased synthesis of secologanin                                    | Asada, Keisuke, et al. "A 7-deoxyloganic acid glucosyltransferase contributes a key step in secologanin biosynthesis in Madagascar periwinkle." The Plant Cell 25.10 (2013): 4123-4134.                                                                                                                                                                                   |
| Solyc05g014000.3 | -1.73 | probable pectate lyase 5                                         | At1g67750 | Part of the pathway pectin degradation, which is itself part of Glycan metabolism                            | <i>Impaired pectin degradation</i>                                    | Pischke, Melissa S., Edward L. Huttlin, Adrian D. Hegeman, and Michael R. Sussman. "A transcriptome-based characterization of habituation in plant tissue culture." Plant Physiology 140, no. 4 (2006): 1255-1278.                                                                                                                                                        |

| TomatoID                | DE    | NCBI Protein Name                             | Gene ID   | Uniprot Description                                                                                                                                                                                   | Putative Consequences for Infection                                          | Citation                                                                                                                                                                                                                                                                                                                                                              |
|-------------------------|-------|-----------------------------------------------|-----------|-------------------------------------------------------------------------------------------------------------------------------------------------------------------------------------------------------|------------------------------------------------------------------------------|-----------------------------------------------------------------------------------------------------------------------------------------------------------------------------------------------------------------------------------------------------------------------------------------------------------------------------------------------------------------------|
| <i>Solyc02g066970.1</i> | -1.72 | transcription factor PAR1                     | PAR1      | Negative regulator of a variety of shade avoidance syndrome responses, including seedling elongation and photosynthetic pigment accumulation; Transcriptional repressor of two auxin-responsive genes | <i>Impaired shade avoidance; Impaired repression of auxin signaling</i>      | Roig-Villanova, Irma, Jordi Bou-Torrent, Anahit Galstyan, Lorenzo Carretero-Paulet, Sergi Portolés, Manuel Rodríguez-Concepción, and Jaime F. Martínez-García. "Interaction of shade avoidance and auxin responses: a role for two novel atypical bHLH proteins." <i>The EMBO journal</i> 26, no. 22 (2007): 4756-4767.                                               |
| <i>Solyc10g074540.1</i> | -1.72 | protein EXORDIUM-like 5                       | EXL5      | Plays a role in a brassinosteroid-dependent regulation of growth and development                                                                                                                      | <i>Impaired growth and development</i>                                       | Krinke, Ondrej, Eric Ruelland, Olga Valentová, Chantal Vergnolle, Jean-Pierre Renou, Ludivine Taconnat, Matyás Flemr, Lenka Burketová, and Alain Zachowski. "Phosphatidylinositol 4-kinase activation is an early response to salicylic acid in Arabidopsis suspension cells." <i>Plant Physiology</i> 144, no. 3 (2007): 1347-1359.                                  |
| <i>Solyc01g098740.3</i> | -1.71 | probable serine/threonine-protein kinase PBL7 | PBL7      | Serine/threonine-protein kinase involved in the positive regulation of brassinosteroid signaling and plant growth                                                                                     | <i>Impaired brassinosteroid signaling; Impaired growth</i>                   | Kim, Tae-Wuk, Shenheng Guan, Alma L. Burlingame, and Zhi-Yong Wang. "The CDG1 kinase mediates brassinosteroid signal transduction from BRI1 receptor kinase to BSU1 phosphatase and GSK3-like kinase BIN2." <i>Molecular cell</i> 43, no. 4 (2011): 561-571.                                                                                                          |
| <i>Solyc01g096450.3</i> | -1.71 | aspartyl protease AED3                        | AED3      | Involved in regulation of programmed cell death; Involved in systemic acquired resistance                                                                                                             | <i>Impaired programmed cell death; Impaired systemic acquired resistance</i> | Dinneny, Jose R., Terri A. Long, Jean Y. Wang, Jee W. Jung, Daniel Mace, Solomon Pointer, Christa Barron, Siobhan M. Brady, John Schiefelbein, and Philip N. Benfey. "Cell identity mediates the response of Arabidopsis roots to abiotic stress." <i>Science</i> 320, no. 5878 (2008): 942-945.                                                                      |
| <i>Solyc05g009470.3</i> | -1.70 | alpha-xylosidase 1                            | XYL1      | Glycoside hydrolase releasing xylosyl residues from xyloglucan oligosaccharides; Essential for growth/development                                                                                     | <i>Impaired growth/development</i>                                           | Sampedro, Javier, et al. "Cloning and expression pattern of a gene encoding an $\alpha$ -xylosidase active against xyloglucan oligosaccharides from Arabidopsis." <i>Plant Physiology</i> 126.2 (2001): 910-920.                                                                                                                                                      |
| <i>Solyc09g007940.3</i> | -1.70 | adenosine kinase 2                            | ADK2      | Essential to sustain methyl recycling                                                                                                                                                                 | <i>Impaired methyl recycling</i>                                             | Pereira, L. A. R., M. Todorova, X. Cai, C. A. Makaroff, R. J. N. Emery, and B. A. Moffatt. "Methyl recycling activities are co-ordinately regulated during plant development." <i>Journal of experimental botany</i> 58, no. 5 (2007): 1083-1098.                                                                                                                     |
| <i>Solyc04g081300.3</i> | -1.70 | endoglucanase 2                               | At1g19940 | Involved in cellulose catabolism; Involved in cell wall organization                                                                                                                                  | <i>Impaired cellulose catabolism; Impaired cell wall organization</i>        | Brown, David M., Leo AH Zeef, Joanne Ellis, Royston Goodacre, and Simon R. Turner. "Identification of novel genes in Arabidopsis involved in secondary cell wall formation using expression profiling and reverse genetics." <i>The Plant Cell</i> 17, no. 8 (2005): 2281-2295.                                                                                       |
| <i>Solyc07g045080.3</i> | -1.69 | 2-alkenal reductase (NADP(+)-dependent)-like  | DBR       | Reduces the C=C double bonds of alpha, beta unsaturated enones                                                                                                                                        | N/A                                                                          | Hirata, Toshifumi, Akihito Matsushima, Yuya Sato, Toshihiko Iwasaki, Hidetaka Nomura, Takayoshi Watanabe, Saki Toyoda, and Shunsuke Izumi. "Stereospecific hydrogenation of the CC double bond of enones by Escherichia coli overexpressing an enone reductase of Nicotiana tabacum." <i>Journal of Molecular Catalysis B: Enzymatic</i> 59, no. 1-3 (2009): 158-162. |

| TomatoID                | DE    | NCBI Protein Name                                       | Gene ID   | Uniprot Description                                                                                                                          | Putative Consequences for Infection                                                                                       | Citation                                                                                                                                                                                                                                                                                                                                             |
|-------------------------|-------|---------------------------------------------------------|-----------|----------------------------------------------------------------------------------------------------------------------------------------------|---------------------------------------------------------------------------------------------------------------------------|------------------------------------------------------------------------------------------------------------------------------------------------------------------------------------------------------------------------------------------------------------------------------------------------------------------------------------------------------|
| Solyc04g055250.3        | -1.68 | uncharacterized protein LOC101258942                    | N/A       | N/A                                                                                                                                          | N/A                                                                                                                       | N/A                                                                                                                                                                                                                                                                                                                                                  |
| Solyc01g005295.1        | -1.67 | N/A                                                     | N/A       | N/A                                                                                                                                          | N/A                                                                                                                       | N/A                                                                                                                                                                                                                                                                                                                                                  |
| Solyc08g079680.3        | -1.67 | uncharacterized protein LOC101259562                    | N/A       | N/A                                                                                                                                          | N/A                                                                                                                       | N/A                                                                                                                                                                                                                                                                                                                                                  |
| Solyc04g082030.1        | -1.66 | ornithine decarboxylase                                 | ODC       | Catalyzes the first and rate-limiting step of polyamine biosynthesis that converts ornithine into putrescine                                 | Impaired production of polyamines, spermidine, and spermine                                                               | Alabadi, David, and Juan Carbonell. "Expression of ornithine decarboxylase is transiently increased by pollination, 2, 4-dichlorophenoxyacetic acid, and gibberellic acid in tomato ovaries." <i>Plant physiology</i> 118.1 (1998): 323-328.                                                                                                         |
| <i>Solyc01g096040.3</i> | -1.65 | aspartyl protease family protein 2                      | APF2      | Involved in response to karrikin, a positive plant growth regulator                                                                          | <i>Impaired plant growth</i>                                                                                              | Li, Yurong, Mehdi Kabbage, Wende Liu, and Martin B. Dickman. "Aspartyl protease-mediated cleavage of BAG6 is necessary for autophagy and fungal resistance in plants." <i>The Plant Cell</i> 28, no. 1 (2016): 233-247.                                                                                                                              |
| <i>Solyc04g078520.3</i> | -1.64 | protein RICE SALT SENSITIVE 3-like                      | RSS3      | Represses jasmonate-induced genes; Involved in transcriptional regulation in the root tip; Regulates root cell elongation during salt stress | <i>Impaired repression of jasmonate-induced genes; Increased jasmonate-related defense; Impaired root cell elongation</i> | Toda, Yosuke, Maiko Tanaka, Daisuke Ogawa, Kyo Kurata, Ken-ichi Kurotani, Yoshiki Habu, Tsuyu Ando et al. "RICE SALT SENSITIVE3 forms a ternary complex with JAZ and class-C bHLH factors and regulates jasmonate-induced gene expression and root cell elongation." <i>The Plant Cell</i> 25, no. 5 (2013): 1709-1725.                              |
| <i>Solyc03g096050.3</i> | -1.63 | probable 2-oxoglutarate-dependent dioxygenase At5g05600 | AT5G05600 | Involved in anthocyanin and protoanthocyanidin biosynthesis                                                                                  | <i>Impaired anthocyanin and protoanthocyanidin biosynthesis</i>                                                           | Wang, Yi, et al. "Transcriptome analyses show changes in gene expression to accompany pollen germination and tube growth in Arabidopsis." <i>Plant physiology</i> 148.3 (2008): 1201-1211.                                                                                                                                                           |
| <i>Solyc03g113060.3</i> | -1.61 | ABC transporter A family member 7 isoform X1            | ABCA7     | Involved in lipid transport                                                                                                                  | <i>Impaired lipid transport</i>                                                                                           | Badri, D.V., Loyola-Vargas, V.M., Broeckling, C.D., De-la-Peña, C., Jasinski, M., Santelia, D., Martinoia, E., Sumner, L.W., Banta, L.M., Stermitz, F. and Vivanco, J.M., 2008. Altered profile of secondary metabolites in the root exudates of Arabidopsis ATP-binding cassette transporter mutants. <i>Plant Physiology</i> , 146(2), pp.323-324. |
| Solyc03g005900.3        | -1.61 | GDSL esterase/lipase At5g45670-like                     | At5g45670 | Involved in lipid catabolic process                                                                                                          | Impaired lipid catabolism                                                                                                 | Rouhier, Nicolas, Arsenio Villarejo, Manoj Srivastava, Eric Gelhaye, Olivier Keech, Michel Droux, Iris Finkemeier et al. "Identification of plant glutaredoxin targets." <i>Antioxidants &amp; redox signaling</i> 7, no. 7-8 (2005): 919-929.                                                                                                       |
| <i>Solyc01g104400.3</i> | -1.61 | basic blue protein                                      | ARPN      | Forms a concentration gradient along the pollen tube growth path                                                                             | <i>Impaired pollen tube growth</i>                                                                                        | Dong, Juan, Sun Tae Kim, and Elizabeth M. Lord. "Plantacyanin plays a role in reproduction in Arabidopsis." <i>Plant Physiology</i> 138, no. 2 (2005): 778-789.                                                                                                                                                                                      |
| <i>Solyc10g047430.1</i> | -1.61 | ribulose 1,5-bisphosphate carboxylase, partial          | RBCMT     | Methylates 'Lys-14' of the large subunit of RuBisCO                                                                                          | <i>Impaired RuBisCO activity</i>                                                                                          | N/A                                                                                                                                                                                                                                                                                                                                                  |

| TomatoID                | DE    | NCBI Protein Name                                     | Gene ID      | Uniprot Description                                                                                                                                                 | Putative Consequences for Infection                                                   | Citation                                                                                                                                                                                                                                                                                                                             |
|-------------------------|-------|-------------------------------------------------------|--------------|---------------------------------------------------------------------------------------------------------------------------------------------------------------------|---------------------------------------------------------------------------------------|--------------------------------------------------------------------------------------------------------------------------------------------------------------------------------------------------------------------------------------------------------------------------------------------------------------------------------------|
| <i>Solyc12g005020.2</i> | -1.60 | NEP1-interacting protein-like 1 isoform X1            | ATL27        | Involved in the early steps of the plant defense signaling pathway                                                                                                  | <i>Impaired plant defense</i>                                                         | Libault, Marc, Jinrong Wan, Tomasz Czechowski, Michael Udvardi, and Gary Stacey. "Identification of 118 Arabidopsis transcription factor and 30 ubiquitin-ligase genes responding to chitin, a plant-defense elicitor." <i>Molecular plant-microbe interactions</i> 20, no. 8 (2007): 900-911.                                       |
| <i>Solyc03g117560.3</i> | -1.59 | lamin-like protein                                    | At5g15350    | Has electron transfer activity; Involved in early response to salicylic acid                                                                                        | <i>Impaired salicylic acid-induced defense</i>                                        | Krinke, Ondrej, Eric Ruelland, Olga Valentová, Chantal Vergnolle, Jean-Pierre Renou, Ludivine Tacconat, Matyás Flemr, Lenka Burketová, and Alain Zachowski. "Phosphatidylinositol 4-kinase activation is an early response to salicylic acid in Arabidopsis suspension cells." <i>Plant Physiology</i> 144, no. 3 (2007): 1347-1359. |
| <i>Solyc07g008390.2</i> | -1.58 | salutaridinol 7-O-acetyltransferase-like              | LOC103494518 | Has transferase activity                                                                                                                                            | N/A                                                                                   | Garcia-Mas, Jordi, Andrej Benjak, Walter Sanseverino, Michael Bourgeois, Gisela Mir, Víctor M. González, Elizabeth Hénaff et al. "The genome of melon ( <i>Cucumis melo</i> L.)." <i>Proceedings of the National Academy of Sciences</i> 109, no. 29 (2012): 11872-11877.                                                            |
| <i>Solyc05g005760.3</i> | -1.58 | uncharacterized protein LOC101255990 isoform X1       | N/A          | N/A                                                                                                                                                                 | N/A                                                                                   | N/A                                                                                                                                                                                                                                                                                                                                  |
| <i>Solyc12g044310.2</i> | -1.57 | protein NRT1/ PTR FAMILY 1.2                          | NPF1.2       | Low-affinity nitrate transporter involved in xylem-to-phloem transfer for redistributing nitrate into developing leaves                                             | <i>Impaired nitrate transport; Impaired growth/development</i>                        | Hsu, Po-Kai, and Yi-Fang Tsay. "Two phloem nitrate transporters, NRT1. 11 and NRT1. 12, are important for redistributing xylem-borne nitrate to enhance plant growth." <i>Plant Physiology</i> 163, no. 2 (2013): 844-856.                                                                                                           |
| <i>Solyc09g008860.3</i> | -1.56 | leucine-rich repeat receptor-like protein kinase PXC1 | PXC1         | Involved in secondary cell wall formation in xylem fibers; Regulates interfascicular fiber cell maturation; Promotes secondary wall formation during cell expansion | <i>Impaired xylem growth; Impaired fiber cell maturation; Impaired cell expansion</i> | Wang, Jiehua, Melis Kucukoglu, Linbin Zhang, Peng Chen, Daniel Decker, Ove Nilsson, Brian Jones, Göran Sandberg, and Bo Zheng. "The Arabidopsis LRR-RLK, PXC1, is a regulator of secondary wall formation correlated with the TDIF-PXY/TDR-WOX4 signaling pathway." <i>BMC plant biology</i> 13, no. 1 (2013): 1-11.                 |
| <i>Solyc06g083050.3</i> | -1.56 | serine carboxypeptidase-like 20                       | SCPL20       | Carboxypeptidase                                                                                                                                                    | N/A                                                                                   | N/A                                                                                                                                                                                                                                                                                                                                  |
| <i>Solyc03g025730.3</i> | -1.54 | tubulin beta-1 chain                                  | TUBB1        | Tubulin is the major constituent of microtubules                                                                                                                    | <i>Impaired microtubule development</i>                                               | Cao, Dongni, Hui Cheng, Wei Wu, Hui Meng Soo, and Jinrong Peng. "Gibberellin mobilizes distinct DELLA-dependent transcriptomes to regulate seed germination and floral development in Arabidopsis." <i>Plant physiology</i> 142, no. 2 (2006): 509-525.                                                                              |
| <i>Solyc02g090990.1</i> | -1.54 | mitogen-activated protein kinase kinase 17-like       | MAPKKK17     | Component of the abscisic acid signaling pathway that acts as a signal transducer under abiotic stress                                                              | <i>Impaired response to abiotic stress</i>                                            | Danquah, Agyemang, Axel de Zélicourt, Marie Boudsocq, Jorinde Neubauer, Nicolas Frei dit Frey, Nathalie Leonhardt, Stephanie Pateyron et al. "Identification and characterization of an ABA-activated MAP kinase cascade in Arabidopsis thaliana." <i>The Plant Journal</i> 82, no. 2 (2015): 232-244.                               |

| TomatoID                | DE    | NCBI Protein Name                                                                | Gene ID   | Uniprot Description                                                                                                                                                 | Putative Consequences for Infection                                                                                          | Citation                                                                                                                                                                                                                                                                                                           |
|-------------------------|-------|----------------------------------------------------------------------------------|-----------|---------------------------------------------------------------------------------------------------------------------------------------------------------------------|------------------------------------------------------------------------------------------------------------------------------|--------------------------------------------------------------------------------------------------------------------------------------------------------------------------------------------------------------------------------------------------------------------------------------------------------------------|
| <i>Solyc08g007240.3</i> | -1.53 | nudix hydrolase 8 isoform X2                                                     | NUDT8     | Mediates the hydrolysis of some nucleoside diphosphate derivatives; Positive regulator of defense response through salicylic acid signaling                         | <i>Impaired salicylic acid-induced defense</i>                                                                               | Fonseca, Jose Pedro, and Xinnian Dong. "Functional characterization of a Nudix hydrolase AtNUDX8 upon pathogen attack indicates a positive role in plant immune responses." <i>PLoS one</i> 9, no. 12 (2014): e114119.                                                                                             |
| <i>Solyc11g063520.1</i> | -1.52 | dof zinc finger protein DOF2.1-like                                              | DOF2.1    | Transcription regulator                                                                                                                                             | N/A                                                                                                                          | Riechmann, Jose Luis, J. Heard, G. Martin, L. Reuber, C-Z. Jiang, J. Keddie, L. Adam et al. "Arabidopsis transcription factors: genome-wide comparative analysis among eukaryotes." <i>science</i> 290, no. 5499 (2000): 2105-2110.                                                                                |
| <i>Solyc08g067890.3</i> | -1.52 | eukaryotic translation initiation factor 5B                                      | At1g76720 | Has translation initiation factor activity                                                                                                                          | N/A                                                                                                                          | Cheng, Chia-Yi, Vivek Krishnakumar, Agnes P. Chan, Françoise Thibaud-Nissen, Seth Schobel, and Christopher D. Town. "Araport11: a complete reannotation of the Arabidopsis thaliana reference genome." <i>The Plant Journal</i> 89, no. 4 (2017): 789-804.                                                         |
| <i>Solyc02g080160.3</i> | -1.51 | probable xyloglucan endotransglucosylase/hydrolase protein 8 isoform X2          | XTH8      | Cleaves and religates xyloglucan polymers, an essential constituent of the primary cell wall, and thereby participates in cell wall construction of growing tissues | <i>Impaired plant cell wall growth/development</i>                                                                           | Bischoff, Volker, Sarah Jane Cookson, Shuang Wu, and Wolf-Rüdiger Scheible. "Thaxtomin A affects CESA-complex density, expression of cell wall genes, cell wall composition, and causes ectopic lignification in Arabidopsis thaliana seedlings." <i>Journal of experimental botany</i> 60, no. 3 (2009): 955-965. |
| <i>Solyc06g065820.3</i> | -1.51 | ethylene response factor H.1                                                     | ERF1A     | Acts as a transcriptional activator; Involved in the regulation of gene expression by stress factors and by components of stress signal transduction pathways       | <i>Impaired stress response</i>                                                                                              | Fujimoto, Susan Y., Masaru Ohta, Akemi Usui, Hideaki Shinshi, and Masaru Ohme-Takagi. "Arabidopsis ethylene-responsive element binding factors act as transcriptional activators or repressors of GCC box-mediated gene expression." <i>The Plant Cell</i> 12, no. 3 (2000): 393-404.                              |
| <i>Solyc06g061200.1</i> | -1.51 | glycine-rich protein TomR2                                                       | TomR2     | N/A                                                                                                                                                                 | N/A                                                                                                                          | Lin, Wan-Chi, et al. "A glycine-rich protein gene family predominantly expressed in tomato roots, but not in leaves and ripe fruit." <i>Plant science</i> 168.2 (2005): 283-295.                                                                                                                                   |
| <i>Solyc05g054090.3</i> | -1.50 | induced stolen tip protein TUB8-like                                             | N/A       | N/A                                                                                                                                                                 | N/A                                                                                                                          | N/A                                                                                                                                                                                                                                                                                                                |
| <i>Solyc08g042100.3</i> | -1.50 | U-box domain-containing protein 3-like                                           | PUB3      | Functions as an E3 ubiquitin ligase                                                                                                                                 | <i>Impaired E3 ubiquitination; Accumulation of misfolded proteins</i>                                                        | Benschop, Joris J., Shabaz Mohammed, Martina O'Flaherty, Albert JR Heck, Monique Slijper, and Frank LH Menke. "Quantitative phosphoproteomics of early elicitor signaling in Arabidopsis." <i>Molecular &amp; Cellular Proteomics</i> 6, no. 7 (2007): 1198-1214.                                                  |
| <i>Solyc04g055207.1</i> | -1.49 | N/A                                                                              | N/A       | N/A                                                                                                                                                                 | N/A                                                                                                                          | N/A                                                                                                                                                                                                                                                                                                                |
| <i>Solyc06g084460.3</i> | -1.49 | bifunctional 3-dehydroquinate dehydratase/shikimate dehydrogenase, chloroplastic | EMB3004   | Involved in aromatic amino acid and chorismate biosynthesis; Involved in embryo development; Necessary for shikimate metabolism                                     | <i>Impaired aromatic aminod acid and chorismate biosynthesis; Impaired embryo development; Impaired shikimate metabolism</i> | Singh, Sasha Anna, and Dinesh Christendat. "Structure of Arabidopsis dehydroquinate dehydratase-shikimate dehydrogenase and implications for metabolic channeling in the shikimate pathway." <i>Biochemistry</i> 45, no. 25 (2006): 7787-7796.                                                                     |
| <i>Solyc06g008990.1</i> | -1.49 | protein FANTASTIC FOUR 1-like                                                    | FAF1      | Represses WUS, a gene related to plant organ development, when constitutively overexpressed                                                                         | <i>Impaired growth and development</i>                                                                                       | Wahl, Vanessa, Luise H. Brand, Ya-Long Guo, and Markus Schmid. "The FANTASTIC FOUR proteins influence shoot meristem size in Arabidopsis thaliana." <i>BMC Plant Biology</i> 10, no. 1 (2010): 1-12.                                                                                                               |

| TomatoID                | DE    | NCBI Protein Name                                           | Gene ID   | Uniprot Description                                    | Putative Consequences for Infection                            | Citation                                                                                                                                                                                                                                                                                                                                                                                    |
|-------------------------|-------|-------------------------------------------------------------|-----------|--------------------------------------------------------|----------------------------------------------------------------|---------------------------------------------------------------------------------------------------------------------------------------------------------------------------------------------------------------------------------------------------------------------------------------------------------------------------------------------------------------------------------------------|
| Solyc11g027690.1        | -1.48 | N/A                                                         | N/A       | N/A                                                    | N/A                                                            | N/A                                                                                                                                                                                                                                                                                                                                                                                         |
| Solyc10g085550.2        | -1.48 | enolase                                                     | At1g56230 | Has enolase activity                                   | N/A                                                            | Ortega-Amaro, María A., Aída A. Rodríguez-Hernández, Margarita Rodríguez-Kessler, Eloísa Hernández-Lucero, Sergio Rosales-Mendoza, Alejandro Ibáñez-Salazar, Pablo Delgado-Sánchez, and Juan F. Jiménez-Bremont. "Overexpression of AtGRDP2, a novel glycine-rich domain protein, accelerates plant growth and improves stress tolerance." <i>Frontiers in plant science</i> 5 (2015): 782. |
| Solyc01g067510.3        | -1.47 | proline-rich receptor-like protein kinase PERK15 isoform X1 | PERK15    | Has protein serine/threonine kinase activity           | Impaired serine and threonine kinase activities                | Nakhmchik, Alina, Zhiying Zhao, Nicholas J. Provart, Shin-Han Shiu, Sarah K. Keatley, Robin K. Cameron, and Daphne R. Goring. "A comprehensive expression analysis of the Arabidopsis proline-rich extensin-like receptor kinase gene family using bioinformatic and experimental approaches." <i>Plant and Cell Physiology</i> 45, no. 12 (2004): 1875-1881.                               |
| Solyc03g080100.3        | -1.47 | heavy metal-associated isoprenylated plant protein 9-like   | HIPP09    | Heavy-metal-binding protein                            | N/A                                                            | Zhang, Ping, Ruling Wang, Qiong Ju, Weiqiang Li, Lam-Son Phan Tran, and Jin Xu. "The R2R3-MYB transcription factor MYB49 regulates cadmium accumulation." <i>Plant physiology</i> 180, no. 1 (2019): 529-542.                                                                                                                                                                               |
| <i>Solyc07g062260.3</i> | -1.47 | BES1/BZR1 homolog protein 4                                 | BEH4      | Involved in brassinosteroid mediated signaling pathway | <i>Impaired plant development and physiological regulation</i> | Wang, Zhi-Yong, Takeshi Nakano, Joshua Gendron, Junxian He, Meng Chen, Dionne Vafeados, Yanli Yang et al. "Nuclear-localized BZR1 mediates brassinosteroid-induced growth and feedback suppression of brassinosteroid biosynthesis." <i>Developmental cell</i> 2, no. 4 (2002): 505-513.                                                                                                    |
| Solyc02g079790.3        | -1.46 | uncharacterized protein LOC101268247 isoform X2             | N/A       | N/A                                                    | N/A                                                            | N/A                                                                                                                                                                                                                                                                                                                                                                                         |
| <i>Solyc04g016200.1</i> | -1.46 | zeatin O-glucosyltransferase                                | ZOG1      | Regulates active vs storage forms of cytokinins        | <i>Impaired seed development</i>                               | Hou, Bingkai, Eng-Kiat Lim, Gillian S. Higgins, and Dianna J. Bowles. "N-glucosylation of cytokinins by glucosyltransferases of Arabidopsis thaliana." <i>Journal of Biological Chemistry</i> 279, no. 46 (2004): 47822-47832.                                                                                                                                                              |
| <i>Solyc10g080940.2</i> | -1.46 | tubulin beta-5 chain                                        | TUBB5     | Tubulin is the major constituent of microtubules       | <i>Impaired microtubule development</i>                        | Cao, Dongni, Hui Cheng, Wei Wu, Hui Meng Soo, and Jinrong Peng. "Gibberellin mobilizes distinct DELLA-dependent transcriptomes to regulate seed germination and floral development in Arabidopsis." <i>Plant physiology</i> 142, no. 2 (2006): 509-525.                                                                                                                                     |
| <i>Solyc12g027550.1</i> | -1.45 | photosystem II CP43 chlorophyll apoprotein                  | psbC      | Photosynthetic electron transporter in photosystem II  | <i>Impaired photosynthesis</i>                                 | Xu, Hong, Dmitrii Vavilin, and Wim Vermaas. "Chlorophyll b can serve as the major pigment in functional photosystem II complexes of cyanobacteria." <i>Proceedings of the National Academy of Sciences</i> 98, no. 24 (2001): 14168-14173.                                                                                                                                                  |
| Solyc11g045150.1        | -1.45 | N/A                                                         | N/A       | N/A                                                    | N/A                                                            | N/A                                                                                                                                                                                                                                                                                                                                                                                         |

| TomatoID                | DE    | NCBI Protein Name                                        | Gene ID   | Uniprot Description                                                                                                     | Putative Consequences for Infection                                | Citation                                                                                                                                                                                                                                                                                                                                    |
|-------------------------|-------|----------------------------------------------------------|-----------|-------------------------------------------------------------------------------------------------------------------------|--------------------------------------------------------------------|---------------------------------------------------------------------------------------------------------------------------------------------------------------------------------------------------------------------------------------------------------------------------------------------------------------------------------------------|
| <i>Solyc06g051680.1</i> | -1.45 | protein EARLY FLOWERING 4                                | ELF4      | Component of the central CCA1/LHY-TOC1 feedback loop in the circadian clock; Controls flowering time                    | <i>Impaired circadian rhythm; Impaired flowering time</i>          | Doyle, Mark R., Seth J. Davis, Ruth M. Bastow, Harriet G. McWatters, László Kozma-Bognár, Ferenc Nagy, Andrew J. Millar, and Richard M. Amasino. "The ELF4 gene controls circadian rhythms and flowering time in <i>Arabidopsis thaliana</i> ." <i>Nature</i> 419, no. 6902 (2002): 74-77.                                                  |
| <i>Solyc11g056250.1</i> | -1.44 | N/A                                                      | N/A       | N/A                                                                                                                     | N/A                                                                | N/A                                                                                                                                                                                                                                                                                                                                         |
| <i>Solyc11g008080.2</i> | -1.44 | uncharacterized protein LOC101263962                     | N/A       | N/A                                                                                                                     | N/A                                                                | N/A                                                                                                                                                                                                                                                                                                                                         |
| <i>Solyc08g066610.3</i> | -1.43 | uncharacterized protein LOC101250825                     | N/A       | N/A                                                                                                                     | N/A                                                                | N/A                                                                                                                                                                                                                                                                                                                                         |
| <i>Solyc06g074463.1</i> | -1.42 | N/A                                                      | N/A       | N/A                                                                                                                     | N/A                                                                | N/A                                                                                                                                                                                                                                                                                                                                         |
| <i>Solyc04g008850.1</i> | -1.42 | protein ASPARTIC PROTEASE IN GUARD CELL 2-like           | ASPG2     | Aspartic protease involved in drought avoidance through abscisic acid signaling                                         | <i>Impaired drought response; Impaired abscisic acid signaling</i> | Yao, Xuan, Wei Xiong, Tiantian Ye, and Yan Wu. "Overexpression of the aspartic protease ASPG1 gene confers drought avoidance in <i>Arabidopsis</i> ." <i>Journal of experimental botany</i> 63, no. 7 (2012): 2579-2593.                                                                                                                    |
| <i>Solyc06g076570.3</i> | -1.41 | class I small heat shock protein                         | HSP17.8   | Cytosolic mediator for sorting and targeting of nascent chloroplast outer envelope membrane proteins to the chloroplast | <i>Impaired chloroplast transport</i>                              | Kim, Dae Heon, Zheng-Yi Xu, Yun Jeong Na, Yun-Joo Yoo, Junho Lee, Eun-Ju Sohn, and Inhwan Hwang. "Small heat shock protein Hsp17.8 functions as an AKR2A cofactor in the targeting of chloroplast outer membrane proteins in <i>Arabidopsis</i> ." <i>Plant physiology</i> 157, no. 1 (2011): 132-146.                                      |
| <i>Solyc04g050730.3</i> | -1.41 | GDSL-motif esterase/acyltransferase/lipase precursor     | At1g29670 | Involved in lipid catabolism                                                                                            | Impaired lipid catabolism                                          | Thieme, Christoph J., Monica Rojas-Triana, Ewelina Stecyk, Christian Schudoma, Wenna Zhang, Lei Yang, Miguel Miñambres et al. "Endogenous <i>Arabidopsis</i> messenger RNAs transported to distant tissues." <i>Nature Plants</i> 1, no. 4 (2015): 1-9.                                                                                     |
| <i>Solyc05g005560.4</i> | -1.41 | polygalacturonase-1 non-catalytic subunit beta precursor | GP2       | Non-catalytic subunit of polygalacturonase involved in cell wall organization                                           | <i>Impaired plant cell wall organization</i>                       | N/A                                                                                                                                                                                                                                                                                                                                         |
| <i>Solyc03g123630.3</i> | -1.41 | pectinesterase/pectinesterase inhibitor U1 precursor     | PMEU1     | Acts in the modification of cell walls via demethylesterification of cell wall pectin                                   | <i>Impaired plant cell wall modification/development</i>           | Phan, Thanh D., Wen Bo, Gill West, Grantley W. Lycett, and Gregory A. Tucker. "Silencing of the major salt-dependent isoform of pectinesterase in tomato alters fruit softening." <i>Plant physiology</i> 144, no. 4 (2007): 1960-1967.                                                                                                     |
| <i>Solyc01g110340.3</i> | -1.41 | endoglucanase 24-like                                    | At4g39010 | Involved in fruit dehiscence and fruit valve development; Involved in plant cell wall loosening                         | <i>Impaired fruit development</i>                                  | Urbanowicz, Breeanna R., Alan B. Bennett, Elena Del Campillo, Carmen Catalá, Takahisa Hayashi, Bernard Henrissat, Herman Höfte et al. "Structural organization and a standardized nomenclature for plant endo-1, 4- $\beta$ -glucanases (cellulases) of glycosyl hydrolase family 9." <i>Plant Physiology</i> 144, no. 4 (2007): 1693-1696. |

| TomatoID                | DE    | NCBI Protein Name                                             | Gene ID   | Uniprot Description                                                                                                                                                 | Putative Consequences for Infection                                                                                    | Citation                                                                                                                                                                                                                                                                                                                                                                      |
|-------------------------|-------|---------------------------------------------------------------|-----------|---------------------------------------------------------------------------------------------------------------------------------------------------------------------|------------------------------------------------------------------------------------------------------------------------|-------------------------------------------------------------------------------------------------------------------------------------------------------------------------------------------------------------------------------------------------------------------------------------------------------------------------------------------------------------------------------|
| <i>Solyc06g034390.1</i> | -1.40 | protein EXORDIUM-like 3                                       | EXL3      | Plays a role in a brassinosteroid-dependent regulation of growth and development                                                                                    | <i>Impaired growth and development</i>                                                                                 | Krinke, Ondrej, Eric Ruelland, Olga Valentová, Chantal Vergnolle, Jean-Pierre Renou, Ludvine Tacconat, Matyás Flemer, Lenka Burketová, and Alain Zachowski. "Phosphatidylinositol 4-kinase activation is an early response to salicylic acid in Arabidopsis suspension cells." <i>Plant Physiology</i> 144, no. 3 (2007): 1347-1359.                                          |
| <i>Solyc07g052980.3</i> | -1.39 | xyloglucan endotransglycosylase/hydrolase 16 precursor        | XTH16     | Cleaves and religates xyloglucan polymers, an essential constituent of the primary cell wall, and thereby participates in cell wall construction of growing tissues | <i>Impaired plant cell wall expansion</i>                                                                              | Sasidharan, Rashmi, C. C. Chinnappa, Marten Staal, J. Theo M. Elzenga, Ryusuke Yokoyama, Kazuhiko Nishitani, Laurentius ACJ Voesenek, and Ronald Pierik. "Light quality-mediated petiole elongation in Arabidopsis during shade avoidance involves cell wall modification by xyloglucan endotransglucosylase/hydrolases." <i>Plant physiology</i> 154, no. 2 (2010): 978-990. |
| <i>Solyc04g015620.3</i> | -1.39 | uncharacterized protein LOC101245049                          | N/A       | N/A                                                                                                                                                                 | N/A                                                                                                                    | N/A                                                                                                                                                                                                                                                                                                                                                                           |
| <i>Solyc12g006120.2</i> | -1.38 | nuclear transcription factor Y subunit B-3-like               | NFYB3     | Component of the NF-Y/HAP transcription factor complex, which stimulates transcription                                                                              | Impaired transcription                                                                                                 | Zhang, Zhong-Wei, Ling-Yang Feng, Jian Cheng, He Tang, Fei Xu, Feng Zhu, Zhong-Yi Zhao et al. "The roles of two transcription factors, ABI4 and CBFA, in ABA and plastid signalling and stress responses." <i>Plant molecular biology</i> 83, no. 4-5 (2013): 445-458.                                                                                                        |
| <i>Solyc09g097890.2</i> | -1.37 | cytochrome b561 and DOMON domain-containing protein At3g25290 | At3g25290 | Catecholamine-responsive transmembrane electron transporter                                                                                                         | <i>Impaired transmembrane transport</i>                                                                                | Verelst, Wim, and Han Asard. "Analysis of an Arabidopsis thaliana protein family, structurally related to cytochromes b 561 and potentially involved in catecholamine biochemistry in plants." <i>Journal of plant physiology</i> 161, no. 2 (2004): 175-181.                                                                                                                 |
| <i>Solyc05g010630.3</i> | -1.36 | uncharacterized protein LOC101255791                          | N/A       | N/A                                                                                                                                                                 | N/A                                                                                                                    | N/A                                                                                                                                                                                                                                                                                                                                                                           |
| <i>Solyc02g090960.1</i> | -1.36 | protein RALF-like 34                                          | RALFL34   | Cell signaling peptide that regulates plant stress, growth, and development                                                                                         | <i>Impaired response to plant stress, growth, and development</i>                                                      | Murphy, Evan, Lam Dai Vu, Lisa Van den Broeck, Zhefeng Lin, Priya Ramakrishna, Brigitte Van De Cotte, Allison Gaudinier et al. "RALFL34 regulates formative cell divisions in Arabidopsis pericycle during lateral root initiation." <i>Journal of Experimental Botany</i> 67, no. 16 (2016): 4863-4875.                                                                      |
| <i>Solyc06g062960.2</i> | -1.35 | protein RALF-like 34                                          | RALFL34   | Cell signaling peptide that may regulate plant stress, growth, and development                                                                                      | <i>Impaired response to plant stress, growth, and development</i>                                                      | Murphy, Evan, Lam Dai Vu, Lisa Van den Broeck, Zhefeng Lin, Priya Ramakrishna, Brigitte Van De Cotte, Allison Gaudinier et al. "RALFL34 regulates formative cell divisions in Arabidopsis pericycle during lateral root initiation." <i>Journal of Experimental Botany</i> 67, no. 16 (2016): 4863-4875.                                                                      |
| <i>Solyc09g009010.3</i> | -1.35 | glucomannan 4-beta-mannosyltransferase 9-like isoform X2      | CSLA9     | Required for lateral root development; Involved in cell wall organization; Involved in response to bacteria                                                         | <i>Impaired lateral root development; Impaired plant cell wall organization; Impaired defense response to bacteria</i> | Liepman, Aaron H., C. Joseph Nairn, William GT Willats, Iben Sørensen, Alison W. Roberts, and Kenneth Keegstra. "Functional genomic analysis supports conservation of function among cellulose synthase-like a gene family members and suggests diverse roles of mannans in plants." <i>Plant Physiology</i> 143, no. 4 (2007): 1881-1893.                                    |



| TomatoID                | DE    | NCBI Protein Name                                                  | Gene ID      | Uniprot Description                                                                                                                                                | Putative Consequences for Infection                                                                                    | Citation                                                                                                                                                                                                                                                                                                                                    |
|-------------------------|-------|--------------------------------------------------------------------|--------------|--------------------------------------------------------------------------------------------------------------------------------------------------------------------|------------------------------------------------------------------------------------------------------------------------|---------------------------------------------------------------------------------------------------------------------------------------------------------------------------------------------------------------------------------------------------------------------------------------------------------------------------------------------|
| <i>Solyc09g008990.3</i> | -1.35 | glucomannan 4-beta-mannosyltransferase 9-like isoform X2           | CSLA9        | Required for lateral root development; Involved in cell wall organization; Involved in response to bacteria                                                        | <i>Impaired lateral root development; Impaired plant cell wall organization; Impaired defense response to bacteria</i> | Liepmann, Aaron H., C. Joseph Nairn, William GT Willats, Iben Sørensen, Alison W. Roberts, and Kenneth Keegstra. "Functional genomic analysis supports conservation of function among cellulose synthase-like a gene family members and suggests diverse roles of mannans in plants." <i>Plant Physiology</i> 143, no. 4 (2007): 1881-1893. |
| <i>Solyc03g093410.3</i> | -1.35 | hexose carrier protein HEX6                                        | HEX6         | Involved in uptake of hexoses; Symporter activity                                                                                                                  | <i>Impaired hexose uptake</i>                                                                                          | Weig, Alfons, Juliane Franz, Norbert Sauer, and Ewald Komor. "Isolation of a family of cDNA clones from <i>Ricinus communis</i> L. with close homology to the hexose carriers." <i>Journal of Plant Physiology</i> 143, no. 2 (1994): 178-183.                                                                                              |
| <i>Solyc02g078850.1</i> | -1.34 | glycine-rich cell wall structural protein 1.8                      | At3g17050    | Responsible for plasticity of plant cell wall                                                                                                                      | <i>Impaired plant cell wall modification/development</i>                                                               | Quigley, Françoise, Marie-Louise Villiot, and Régis Mache. "Nucleotide sequence and expression of a novel glycine-rich protein gene from <i>Arabidopsis thaliana</i> ." <i>Plant molecular biology</i> 17, no. 4 (1991): 949-952.                                                                                                           |
| <i>Solyc12g099260.2</i> | -1.34 | ATP-citrate synthase beta chain protein 2-like                     | ACLA-2       | Used for the elongation of fatty acids and biosynthesis of isoprenoids, flavonoids, and malonated derivatives; Required for normal growth and development in seeds | <i>Impaired seed development; Impaired production of primary metabolites</i>                                           | Fatland, Beth L., Basil J. Nikolau, and Eve Syrkin Wurtele. "Reverse genetic characterization of cytosolic acetyl-CoA generation by ATP-citrate lyase in <i>Arabidopsis</i> ." <i>The Plant Cell</i> 17.1 (2005): 182-203.                                                                                                                  |
| <i>Solyc09g014610.3</i> | -1.34 | S-type anion channel SLAH2-like                                    | LOC107824438 | Involved in transmembrane transport                                                                                                                                | <i>Impaired transmembrane transport</i>                                                                                | Sierro, Nicolas, James ND Battey, Sonia Ouadi, Nicolas Bakaher, Lucien Bovet, Adrian Willig, Simon Goepfert, Manuel C. Peitsch, and Nikolai V. Ivanov. "The tobacco genome sequence and its comparison with those of tomato and potato." <i>Nature communications</i> 5, no. 1 (2014): 1-9.                                                 |
| <i>Solyc06g075010.3</i> | -1.34 | ruBisCO large subunit-binding protein subunit alpha, chloroplastic | N/A          | Involved in protein refolding                                                                                                                                      | N/A                                                                                                                    | N/A                                                                                                                                                                                                                                                                                                                                         |
| <i>Solyc08g014130.3</i> | -1.33 | isopropylmalate synthase                                           | N/A          | N/A                                                                                                                                                                | N/A                                                                                                                    | N/A                                                                                                                                                                                                                                                                                                                                         |
| <i>Solyc11g066720.2</i> | -1.33 | UDP-D-apiose/UDP-D-xylose synthase 2                               | AXS2         | Catalyzes the conversion of UDP-D-glucuronate to a mixture of UDP-D-apiose and UDP-D-xylose, a plant cell wall monosaccharide with a unique role                   | <i>Impaired plant cell wall modification/development</i>                                                               | Møhlhøj, Michael, Rajeev Verma, and Wolf-Dieter Reiter. "The biosynthesis of the branched-chain sugar d-apiose in plants: functional cloning and characterization of a UDP-d-apiose/UDP-d-xylose synthase from <i>Arabidopsis</i> ." <i>The Plant Journal</i> 35, no. 6 (2003): 693-703.                                                    |
| <i>Solyc02g081060.3</i> | -1.32 | chaperonin-like RBCX protein 1, chloroplastic                      | RBCX1        | Chaperone involved in RuBisCO assembly process                                                                                                                     | <i>Impaired RuBisCO activity</i>                                                                                       | Kolesiński, Piotr, Janusz Piechota, and Andrzej Szczepaniak. "Initial characteristics of RbcX proteins from <i>Arabidopsis thaliana</i> ." <i>Plant molecular biology</i> 77, no. 4 (2011): 447-459.                                                                                                                                        |

| TomatoID                | DE    | NCBI Protein Name                               | Gene ID   | Uniprot Description                                                                                                                                                                                                                                     | Putative Consequences for Infection                                  | Citation                                                                                                                                                                                                                                                                                                                                                                           |
|-------------------------|-------|-------------------------------------------------|-----------|---------------------------------------------------------------------------------------------------------------------------------------------------------------------------------------------------------------------------------------------------------|----------------------------------------------------------------------|------------------------------------------------------------------------------------------------------------------------------------------------------------------------------------------------------------------------------------------------------------------------------------------------------------------------------------------------------------------------------------|
| <i>Solyc10g061830.2</i> | -1.32 | photosystem II 44 kDa protein                   | psbC      | Photosynthetic electron transporter in photosystem II                                                                                                                                                                                                   | <i>Impaired photosynthesis</i>                                       | Ahmed, Ibrar, Peter J. Matthews, Patrick J. Biggs, Muhammad Naeem, Patricia A. McLenachan, and Peter J. Lockhart. "Identification of chloroplast genome loci suitable for high-resolution phylogeographic studies of <i>C. olocasia esculenta</i> (L.) S chott (A raceae) and closely related taxa." <i>Molecular Ecology Resources</i> 13, no. 5 (2013): 929-937.                 |
| Solyc02g080635.1        | -1.32 | N/A                                             | N/A       | N/A                                                                                                                                                                                                                                                     | N/A                                                                  | N/A                                                                                                                                                                                                                                                                                                                                                                                |
| <i>Solyc03g113720.3</i> | -1.32 | two-component response regulator ARR15          | ARR15     | Functions as response regulator involved in His-to-Asp phosphorelay signal transduction system; Negative regulator of the cytokinin signaling                                                                                                           | <i>Impaired regulation of cytokinin signaling</i>                    | Kiba, Takatoshi, Hisami Yamada, and Takeshi Mizuno. "Characterization of the ARR15 and ARR16 response regulators with special reference to the cytokinin signaling pathway mediated by the AHK4 histidine kinase in roots of <i>Arabidopsis thaliana</i> ." <i>Plant and Cell Physiology</i> 43, no. 9 (2002): 1059-1066.                                                          |
| Solyc02g083040.1        | -1.31 | uncharacterized protein LOC104645768            | N/A       | N/A                                                                                                                                                                                                                                                     | N/A                                                                  | N/A                                                                                                                                                                                                                                                                                                                                                                                |
| <i>Solyc12g089330.2</i> | -1.30 | synaptotagmin-1                                 | SYT1      | Maintains plasma membrane integrity during freezing and osmotic stresses; Functions in membrane resealing during calcium-dependent freezing tolerance; Regulates endocytosis and endosome recycling at the plasma membrane and cell-to-cell trafficking | <i>Impaired freezing response; Impaired cell-to-cell trafficking</i> | Yamazaki, Tomokazu, Naoki Takata, Matsuo Uemura, and Yukio Kawamura. "Arabidopsis synaptotagmin SYT1, a type I signal-anchor protein, requires tandem C2 domains for delivery to the plasma membrane." <i>Journal of Biological Chemistry</i> 285, no. 30 (2010): 23165-23176.                                                                                                     |
| Solyc11g063500.1        | -1.30 | N/A                                             | N/A       | N/A                                                                                                                                                                                                                                                     | N/A                                                                  | N/A                                                                                                                                                                                                                                                                                                                                                                                |
| <i>Solyc08g082250.3</i> | -1.29 | endo-beta-1,4-D-glucanase precursor             | At3g13560 | Involved in carbohydrate metabolism; Involved in defense response                                                                                                                                                                                       | <i>Impaired carbohydrate metabolism; Impaired defense response</i>   | Jakoby, Marc J., Doris Falkenhan, Michael T. Mader, Ginger Brininstool, Elisabeth Wischnitzki, Nicole Platz, Andrew Hudson, Martin Hulskamp, John Larkin, and Arp Schnittger. "Transcriptional profiling of mature <i>Arabidopsis</i> trichomes reveals that NOECK encodes the MIXTA-like transcriptional regulator MYB106." <i>Plant Physiology</i> 148, no. 3 (2008): 1583-1602. |
| Solyc11g071640.2        | -1.28 | uncharacterized protein LOC101256554 isoform X2 | N/A       | N/A                                                                                                                                                                                                                                                     | N/A                                                                  | N/A                                                                                                                                                                                                                                                                                                                                                                                |
| <i>Solyc04g077020.3</i> | -1.28 | tubulin alpha chain                             | TUBA1     | Tubulin is the major constituent of microtubules                                                                                                                                                                                                        | <i>Impaired microtubule development</i>                              | Saito, Yuka, Kouichi Soga, Kazuyuki Wakabayashi, and Takayuki Hoson. "Increase in expression level of alpha-tubulin gene in <i>Arabidopsis</i> seedlings under hypergravity conditions." <i>Uchu Seibutsu Kagaku</i> 17, no. 3 (2003): 177-178.                                                                                                                                    |

| TomatoID                | DE    | NCBI Protein Name                                 | Gene ID | Uniprot Description                                                                                                                                        | Putative Consequences for Infection                                                      | Citation                                                                                                                                                                                                                                                                                                                                         |
|-------------------------|-------|---------------------------------------------------|---------|------------------------------------------------------------------------------------------------------------------------------------------------------------|------------------------------------------------------------------------------------------|--------------------------------------------------------------------------------------------------------------------------------------------------------------------------------------------------------------------------------------------------------------------------------------------------------------------------------------------------|
| <i>Solyc02g030480.3</i> | -1.28 | probable cinnamyl alcohol dehydrogenase 6         | CAD6    | Involved in lignin biosynthesis                                                                                                                            | <i>Impaired lignin biosynthesis; Impaired plant cell wall growth/development</i>         | Costa, Michael A., R. Eric Collins, Aldwin M. Anterola, Fiona C. Cochrane, Laurence B. Davin, and Norman G. Lewis. "An in silico assessment of gene function and organization of the phenylpropanoid pathway metabolic networks in Arabidopsis thaliana and limitations thereof." <i>Phytochemistry</i> 64, no. 6 (2003): 1097-1112.             |
| <i>Solyc01g111350.3</i> | -1.28 | protein NUCLEAR FUSION DEFECTIVE 4                | NFD4    | Required for karyogamy during female gametophyte development                                                                                               | <i>Impaired female gametophyte development</i>                                           | Portereiko, Michael F., Linda Sandaklie-Nikolova, Alan Lloyd, Chad A. Dever, Denichiro Otsuga, and Gary N. Drews. "NUCLEAR FUSION DEFECTIVE1 encodes the Arabidopsis RPL21M protein and is required for karyogamy during female gametophyte development and fertilization." <i>Plant physiology</i> 141, no. 3 (2006): 957-965.                  |
| <i>Solyc02g065170.3</i> | -1.27 | L-ascorbate oxidase homolog                       | AAO     | Represses responses to high salinity and oxidative stress conditions such as vegetative growth and seed production reductions                              | <i>Impaired regulation of stress responses; Impaired growth/development under stress</i> | Yamamoto, Atsuko, Md Nazmul H. Bhuiyan, Rungaroon Waditee, Yoshito Tanaka, Muneharu Esaka, Kazuko Oba, André T. Jagendorf, and Teruhiro Takabe. "Suppressed expression of the apoplatic ascorbate oxidase gene increases salt tolerance in tobacco and Arabidopsis plants." <i>Journal of Experimental Botany</i> 56, no. 417 (2005): 1785-1796. |
| <i>Solyc11g071460.2</i> | -1.27 | short-chain dehydrogenase/reductase 2b isoform X3 | SDR2b   | Aldehyde reductase that catalyzes the reduction of the aldehyde carbonyl groups on saturated and alpha,beta-unsaturated aldehydes with more than 5 carbons | N/A                                                                                      | Yamauchi, Yasuo, Ayaka Hasegawa, Ai Tanimaka, Masaharu Mizutani, and Yukihiro Sugimoto. "NADPH-dependent reductases involved in the detoxification of reactive carbonyls in plants." <i>Journal of biological chemistry</i> 286, no. 9 (2011): 6999-7009.                                                                                        |
| <i>Solyc04g053000.1</i> | -1.27 | auxin-responsive protein SAUR21-like              | SAUR21  | Positive effectors of cell expansion through modulation of auxin transport                                                                                 | <i>Impaired plant cell wall expansion; Impaired auxin transport</i>                      | Osakabe, Yuriko, Kyonoshin Maruyama, Motoaki Seki, Masakazu Satou, Kazuo Shinozaki, and Kazuko Yamaguchi-Shinozaki. "Leucine-rich repeat receptor-like kinase1 is a key membrane-bound regulator of abscisic acid early signaling in Arabidopsis." <i>The Plant Cell</i> 17, no. 4 (2005): 1105-1119.                                            |
| <i>Solyc03g112880.1</i> | -1.27 | fasciclin-like arabinogalactan protein 4          | FLA4    | Cell surface adhesion protein required for normal cell expansion                                                                                           | <i>Impaired cell expansion</i>                                                           | Xu, Shou-Ling, et al. "Two leucine-rich repeat receptor kinases mediate signaling, linking cell wall biosynthesis and ACC synthase in Arabidopsis." <i>The Plant Cell</i> 20.11 (2008): 3065-3079.                                                                                                                                               |
| <i>Solyc05g005710.3</i> | -1.26 | spermidine synthase                               | SPDS1   | Involved in polyamine biosynthetic process                                                                                                                 | <i>Impaired polyamine biosynthesis; Impaired cell proliferation</i>                      | Cheng, Chia-Yi, Vivek Krishnakumar, Agnes P. Chan, Françoise Thibaud-Nissen, Seth Schobel, and Christopher D. Town. "Araport11: a complete reannotation of the Arabidopsis thaliana reference genome." <i>The Plant Journal</i> 89, no. 4 (2017): 789-804.                                                                                       |
| <i>Solyc04g078810.3</i> | -1.25 | uncharacterized protein LOC101252176 isoform X1   | N/A     | N/A                                                                                                                                                        | N/A                                                                                      | N/A                                                                                                                                                                                                                                                                                                                                              |

| TomatoID         | DE    | NCBI Protein Name                        | Gene ID   | Uniprot Description                                                                                                                          | Putative Consequences for Infection                                                  | Citation                                                                                                                                                                                                                                                                                                                                                                                                                                |
|------------------|-------|------------------------------------------|-----------|----------------------------------------------------------------------------------------------------------------------------------------------|--------------------------------------------------------------------------------------|-----------------------------------------------------------------------------------------------------------------------------------------------------------------------------------------------------------------------------------------------------------------------------------------------------------------------------------------------------------------------------------------------------------------------------------------|
| Solyc01g087785.1 | -1.25 | N/A                                      | N/A       | N/A                                                                                                                                          | N/A                                                                                  | N/A                                                                                                                                                                                                                                                                                                                                                                                                                                     |
| Solyc01g102330.3 | -1.24 | probable carbohydrate esterase At4g34215 | At4g34215 | Involved in secondary plant cell wall biosynthesis                                                                                           | <i>Impaired secondary plant cell wall biosynthesis</i>                               | Andersson-Gunnerås, Sara, Ewa J. Mellerowicz, Jonathan Love, Bo Segerman, Yasunori Ohmiya, Pedro M. Coutinho, Peter Nilsson, Bernard Henrissat, Thomas Moritz, and Björn Sundberg. "Biosynthesis of cellulose-enriched tension wood in Populus: global analysis of transcripts and metabolites identifies biochemical and developmental regulators in secondary wall biosynthesis." <i>The Plant Journal</i> 45, no. 2 (2006): 144-165. |
| Solyc02g063030.3 | -1.24 | uncharacterized protein LOC101260301     | N/A       | N/A                                                                                                                                          | N/A                                                                                  | N/A                                                                                                                                                                                                                                                                                                                                                                                                                                     |
| Solyc00g028960.1 | -1.23 | monothiol glutaredoxin-S1-like           | GRXS1     | Reduces GSH-thiol disulfides                                                                                                                 | Impaired reduction of GSH-thiol disulfides                                           | Patterson, Kurt, et al. "Nitrate-regulated glutaredoxins control Arabidopsis primary root growth." <i>Plant Physiology</i> 170.2 (2016): 989-999.                                                                                                                                                                                                                                                                                       |
| Solyc11g021360.2 | -1.22 | uncharacterized protein LOC101250021     | N/A       | N/A                                                                                                                                          | N/A                                                                                  | N/A                                                                                                                                                                                                                                                                                                                                                                                                                                     |
| Solyc02g087190.1 | -1.22 | peroxidase 63                            | PER63     | Involved in oxidation of toxic reductants, lignin metabolism, suberization, auxin catabolism; Involved in response to environmental stresses | <i>Impaired plant defense; Impaired lignin metabolism; Impaired auxin catabolism</i> | Valério, Luisa, Mireille De Meyer, Claude Penel, and Christophe Dunand. "Expression analysis of the Arabidopsis peroxidase multigenic family." <i>Phytochemistry</i> 65, no. 10 (2004): 1331-1342.                                                                                                                                                                                                                                      |
| Solyc09g014490.3 | -1.22 | endochitinase A                          | At2g43590 | Involved in plant cell wall macromolecule catabolism and chitin catabolism; Involved in defense response                                     | <i>Impaired plant cell wall development; Impaired defense response</i>               | Krysan, Patrick J., Peter J. Jester, Jennifer R. Gottwald, and Michael R. Sussman. "An Arabidopsis mitogen-activated protein kinase kinase gene family encodes essential positive regulators of cytokinesis." <i>The Plant Cell</i> 14, no. 5 (2002): 1109-1120.                                                                                                                                                                        |
| Solyc03g063480.2 | -1.20 | N/A                                      | N/A       | N/A                                                                                                                                          | N/A                                                                                  | N/A                                                                                                                                                                                                                                                                                                                                                                                                                                     |
| Solyc03g044150.3 | -1.20 | subtilisin-like protease SBT1.7          | SBT1.7    | Serine protease essential for mucilage release from seed coats                                                                               | <i>Impaired seed coat development</i>                                                | Rautengarten, Carsten, Björn Usadel, Lutz Neumetzler, Jürgen Hartmann, Dirk Büssis, and Thomas Altmann. "A subtilisin-like serine protease essential for mucilage release from Arabidopsis seed coats." <i>The Plant Journal</i> 54, no. 3 (2008): 466-480.                                                                                                                                                                             |
| Solyc12g009110.2 | -1.20 | acetylserotonin O-methyltransferase      | ASMT      | Methyltransferase which catalyzes the production of melatonin; Involved in response to light stress                                          | <i>Impaired development under light stress</i>                                       | Shi, Haitao, Yunxie Wei, and Chaozu He. "Melatonin-induced CBF/DREB1s are essential for diurnal change of disease resistance and CCA1 expression in Arabidopsis." <i>Plant Physiology and Biochemistry</i> 100 (2016): 150-155.                                                                                                                                                                                                         |
| Solyc07g008900.3 | -1.20 | subtilisin-like protease SBT2.5          | SBT2.5    | Has serine-type endopeptidase activity                                                                                                       | N/A                                                                                  | Ascencio-Ibáñez, José Trinidad, Rosangela Sozzani, Tae-Jin Lee, Tzu-Ming Chu, Russell D. Wolfinger, Rino Cella, and Linda Hanley-Bowdoin. "Global analysis of Arabidopsis gene expression uncovers a complex array of changes impacting pathogen response and cell cycle during geminivirus infection." <i>Plant physiology</i> 148, no. 1 (2008): 436-454.                                                                             |

| TomatoID         | DE    | NCBI Protein Name                                          | Gene ID | Uniprot Description                                                                                                                  | Putative Consequences for Infection                 | Citation                                                                                                                                                                                                                                                                                                                                                    |
|------------------|-------|------------------------------------------------------------|---------|--------------------------------------------------------------------------------------------------------------------------------------|-----------------------------------------------------|-------------------------------------------------------------------------------------------------------------------------------------------------------------------------------------------------------------------------------------------------------------------------------------------------------------------------------------------------------------|
| Solyc08g067840.3 | -1.19 | uncharacterized protein LOC101245936                       | N/A     | N/A                                                                                                                                  | N/A                                                 | N/A                                                                                                                                                                                                                                                                                                                                                         |
| Solyc05g054320.3 | -1.19 | uncharacterized protein LOC101268576                       | N/A     | N/A                                                                                                                                  | N/A                                                 | N/A                                                                                                                                                                                                                                                                                                                                                         |
| Solyc10g011960.2 | -1.19 | heavy metal-associated isoprenylated plant protein 39-like | HIPP39  | Heavy-metal-binding protein                                                                                                          | N/A                                                 | Hanada, Kousuke, Yuji Sawada, Takashi Kurumori, Romy Klausnitzer, Kazuki Saito, Tetsuro Toyoda, Kazuo Shinozaki, Wen-Hsiung Li, and Masami Yokota Hirai. "Functional compensation of primary and secondary metabolites by duplicate genes in Arabidopsis thaliana." Molecular biology and evolution 28, no. 1 (2011): 377-382.                              |
| Solyc04g017720.3 | -1.18 | protein GAST1-like                                         | N/A     | Involved in the gibberellic acid mediated signaling pathway                                                                          | <i>Impaired gibberellic acid mediated signaling</i> | Haas, Brian J., Natalia Volfovsky, Christopher D. Town, Maxim Troukhan, Nikolai Alexandrov, Kenneth A. Feldmann, Richard B. Flavell, Owen White, and Steven L. Salzberg. "Full-length messenger RNA sequences greatly improve genome annotation." Genome biology 3, no. 6 (2002): 1-12.                                                                     |
| Solyc10g017940.1 | -1.18 | photosystem II 44 kDa protein                              | psbC    | Photosynthetic electron transporter in photosystem II                                                                                | <i>Impaired photosynthesis</i>                      | Ahmed, Ibrar, Peter J. Matthews, Patrick J. Biggs, Muhammad Naeem, Patricia A. McLenachan, and Peter J. Lockhart. "Identification of chloroplast genome loci suitable for high-resolution phylogeographic studies of <i>C. olocasia esculenta</i> (L.) S chott (A raceae) and closely related taxa." Molecular Ecology Resources 13, no. 5 (2013): 929-937. |
| Solyc08g065420.3 | -1.18 | homeobox protein ATH1                                      | ATH1    | Transcription factor; Controls floral competency as a specific activator of FLC expression; Responds to import of SHOOT MERISTEMLESS | Impaired floral competency                          | Gómez-Mena, Concepción, and Robert Sablowski. "ARABIDOPSIS THALIANA HOMEBOX GENE1 establishes the basal boundaries of shoot organs and controls stem growth." The Plant Cell 20, no. 8 (2008): 2059-2072.                                                                                                                                                   |
| Solyc06g075000.3 | -1.17 | uncharacterized protein LOC101265549                       | N/A     | N/A                                                                                                                                  | N/A                                                 | N/A                                                                                                                                                                                                                                                                                                                                                         |
| Solyc10g055770.2 | -1.15 | N/A                                                        | N/A     | N/A                                                                                                                                  | N/A                                                 | N/A                                                                                                                                                                                                                                                                                                                                                         |
| Solyc11g066820.2 | -1.14 | glucomannan 4-beta-mannosyltransferase 2                   | CSLA2   | Possesses glucomannan synthase and mannan synthase activities; Galactomannan is a noncellulosic polysaccharides of plant cell wall   | <i>Impaired plant cell wall growth/development</i>  | Liepmann, Aaron H., Curtis G. Wilkerson, and Kenneth Keegstra. "Expression of cellulose synthase-like (Csl) genes in insect cells reveals that CslA family members encode mannan synthases." Proceedings of the National Academy of Sciences 102, no. 6 (2005): 2221-2226.                                                                                  |
| Solyc03g043620.1 | -1.14 | N/A                                                        | N/A     | N/A                                                                                                                                  | N/A                                                 | N/A                                                                                                                                                                                                                                                                                                                                                         |
| Solyc12g038080.1 | -1.14 | photosystem II CP43 chlorophyll apoprotein                 | psbC    | Photosynthetic electron transporter in photosystem II                                                                                | <i>Impaired photosynthesis</i>                      | Xu, Hong, Dmitrii Vavilin, and Wim Vermaas. "Chlorophyll b can serve as the major pigment in functional photosystem II complexes of cyanobacteria." Proceedings of the National Academy of Sciences 98, no. 24 (2001): 14168-14173.                                                                                                                         |

| TomatoID                | DE    | NCBI Protein Name                                                                | Gene ID      | Uniprot Description                                                                                                      | Putative Consequences for Infection                            | Citation                                                                                                                                                                                                                                                                                                                              |
|-------------------------|-------|----------------------------------------------------------------------------------|--------------|--------------------------------------------------------------------------------------------------------------------------|----------------------------------------------------------------|---------------------------------------------------------------------------------------------------------------------------------------------------------------------------------------------------------------------------------------------------------------------------------------------------------------------------------------|
| <i>Solyc10g081810.2</i> | -1.14 | putative phosphatidylglycerol/phosphatidylinositol transfer protein DDB_G0278295 | DDB_G0278295 | Involved in sterol transport                                                                                             | <i>Impaired sterol transport</i>                               | Sillo, Alessio, Gareth Bloomfield, Alessandra Balest, Alessandra Balbo, Barbara Pergolizzi, Barbara Peracino, Jason Skelton, Alasdair Ivens, and Salvatore Bozzaro. "Genome-wide transcriptional changes induced by phagocytosis or growth on bacteria in <i>Dictyostelium</i> ." <i>BMC genomics</i> 9, no. 1 (2008): 1-22.          |
| <i>Solyc01g006370.3</i> | -1.14 | callose synthase 3-like                                                          | CALS3        | Involved in callose synthesis at the forming cell plate during cytokinesis                                               | <i>Impaired callose synthesis; Impaired cell proliferation</i> | Chen, Xiong-Yan, Lin Liu, EunKyoung Lee, Xiao Han, Yeonggil Rim, Hyosub Chu, Seon-Won Kim, Fred Sack, and Jae-Yean Kim. "The Arabidopsis callose synthase gene <i>GSL8</i> is required for cytokinesis and cell patterning." <i>Plant Physiology</i> 150, no. 1 (2009): 105-113.                                                      |
| <i>Solyc11g011020.2</i> | -1.14 | probable inactive receptor kinase At1g48480                                      | RKL1         | Has protein kinase activity                                                                                              | N/A                                                            | Colette, A., Zoltán Bozdanovits, Vera MA Jansweijer, Fenne G. Koning, Lidija Berke, Gabino F. Sanchez-Perez, Ben Scheres, and Renze Heidstra. "Probing the roles of LRR RLK genes in Arabidopsis thaliana roots using a custom T-DNA insertion set." <i>Plant molecular biology</i> 76, no. 1-2 (2011): 69-83.                        |
| <i>Solyc12g010590.2</i> | -1.12 | O-acyltransferase WSD1-like                                                      | At2g38995    | Diacylglycerol O-acyltransferase activity                                                                                | N/A                                                            | Li-Beisson, Yonghua, Basil Shorrosh, Fred Beisson, Mats X. Andersson, Vincent Arondel, Philip D. Bates, Sébastien Baud et al. "Acyl-lipid metabolism." <i>The Arabidopsis book/American Society of Plant Biologists</i> 11 (2013).                                                                                                    |
| <i>Solyc10g086650.1</i> | -1.12 | aldehyde oxidase GLOX                                                            | GLOX1        | Regulated by the transcription factor MYB80 during anther development and plays a role in tapetum and pollen development | <i>Impaired pollen development</i>                             | Phan, Huy Anh, Sylvana Iacuone, Song F. Li, and Roger W. Parish. "The MYB80 transcription factor is required for pollen development and the regulation of tapetal programmed cell death in Arabidopsis thaliana." <i>The Plant Cell</i> 23, no. 6 (2011): 2209-2224.                                                                  |
| <i>Solyc07g055950.3</i> | -1.12 | protodermal factor 1                                                             | PDF1         | Involved in the regulation of meristem growth                                                                            | <i>Impaired growth and development</i>                         | Pholo, Motlalepula, Beatrix Coetzee, Hans J. Maree, Philip R. Young, James R. Lloyd, Jens Kossmann, and Paul N. Hills. "Cell division and turgor mediate enhanced plant growth in Arabidopsis plants treated with the bacterial signalling molecule lumichrome." <i>Planta</i> 248, no. 2 (2018): 477-488.                            |
| <i>Solyc09g055940.3</i> | -1.12 | probable sodium/metabolite cotransporter BASS3, chloroplastic                    | BASS3        | Functions as sodium-coupled metabolite transporter across the chloroplast envelope                                       | <i>Impaired chloroplast transport</i>                          | Hanada, Kousuke, Yuji Sawada, Takashi Kurumori, Romy Klausnitzer, Kazuki Saito, Tetsuro Toyoda, Kazuo Shinozaki, Wen-Hsiung Li, and Masami Yokota Hirai. "Functional compensation of primary and secondary metabolites by duplicate genes in Arabidopsis thaliana." <i>Molecular biology and evolution</i> 28, no. 1 (2011): 377-382. |
| <i>Solyc03g115380.2</i> | -1.12 | UDP-glucose 6-dehydrogenase 1-like                                               | UGD1         | Involved in the biosynthesis of UDP-glucuronic acid, providing nucleotide sugars for cell-wall polymers                  | <i>Impaired nucleotide transport for cell-wall polymers</i>    | Oka, Takuji, and Yoshifumi Jigami. "Reconstruction of de novo pathway for synthesis of UDP-glucuronic acid and UDP-xylose from intrinsic UDP-glucose in <i>Saccharomyces cerevisiae</i> ." <i>The FEBS journal</i> 273.12 (2006): 2645-2657.                                                                                          |

| TomatoID                | DE    | NCBI Protein Name                          | Gene ID | Uniprot Description                                                                                                                                                | Putative Consequences for Infection                                                              | Citation                                                                                                                                                                                                                                                                                                                                                                                              |
|-------------------------|-------|--------------------------------------------|---------|--------------------------------------------------------------------------------------------------------------------------------------------------------------------|--------------------------------------------------------------------------------------------------|-------------------------------------------------------------------------------------------------------------------------------------------------------------------------------------------------------------------------------------------------------------------------------------------------------------------------------------------------------------------------------------------------------|
| <i>Solyc11g013270.2</i> | -1.12 | O-fucosyltransferase 10-like               | FUT10   | Involved in cell wall biosynthesis                                                                                                                                 | <i>Impaired plant cell wall growth/development</i>                                               | Sarria, Rodrigo, Tanya A. Wagner, Malcolm A. O'Neill, Ahmed Faik, Curtis G. Wilkerson, Kenneth Keegstra, and Natasha V. Raikhel. "Characterization of a family of Arabidopsis genes related to xyloglucan fucosyltransferase1." <i>Plant Physiology</i> 127, no. 4 (2001): 1595-1606.                                                                                                                 |
| <i>Solyc09g091050.3</i> | -1.11 | uncharacterized protein LOC101247860       | N/A     | N/A                                                                                                                                                                | N/A                                                                                              | N/A                                                                                                                                                                                                                                                                                                                                                                                                   |
| <i>Solyc04g009790.3</i> | -1.11 | uncharacterized protein LOC101251972       | N/A     | N/A                                                                                                                                                                | N/A                                                                                              | N/A                                                                                                                                                                                                                                                                                                                                                                                                   |
| <i>Solyc11g045260.1</i> | -1.11 | photosystem II 44 kDa protein              | psbC    | Photosynthetic electron transporter in photosystem II                                                                                                              | <i>Impaired photosynthesis</i>                                                                   | Ahmed, Ibrar, Peter J. Matthews, Patrick J. Biggs, Muhammad Naeem, Patricia A. McLenahan, and Peter J. Lockhart. "Identification of chloroplast genome loci suitable for high-resolution phylogeographic studies of <i>C. olocasia esculenta</i> (L.) S chott (A raceae) and closely related taxa." <i>Molecular Ecology Resources</i> 13, no. 5 (2013): 929-937.                                     |
| <i>Solyc06g009940.1</i> | -1.11 | photosystem I P700 apoprotein A1           | psaA    | saA and PsaB bind P700, the primary electron donor of photosystem I; Necessary for photosynthesis                                                                  | <i>Impaired photosynthesis</i>                                                                   | Cournac, Laurent, Kevin Redding, Jacques Ravenel, Dominique Rumeau, Eve-Marie Josse, Marcel Kuntz, and Gilles Peltier. "Electron flow between photosystem II and oxygen in chloroplasts of photosystem I-deficient algae is mediated by a quinol oxidase involved in chlororespiration." <i>Journal of Biological Chemistry</i> 275, no. 23 (2000): 17256-17262.                                      |
| <i>Solyc04g014510.3</i> | -1.10 | glutamine synthetase cytosolic isozyme 1-1 | GLN1-1  | High-affinity glutamine synthetase; Contributes to the homeostatic control of glutamine synthesis in roots                                                         | <i>Impaired glutamine homeostasis in the roots</i>                                               | Ishiyama, Keiki, Eri Inoue, Akiko Watanabe-Takahashi, Mitsuhiro Obara, Tomoyuki Yamaya, and Hideki Takahashi. "Kinetic properties and ammonium-dependent regulation of cytosolic isoenzymes of glutamine synthetase in Arabidopsis." <i>Journal of Biological Chemistry</i> 279, no. 16 (2004): 16598-16605.                                                                                          |
| <i>Solyc04g016480.3</i> | -1.10 | protein IQ-DOMAIN 14                       | IQD14   | Involved in cooperative interactions with calmodulins or calmodulin-like proteins; Scaffold in cellular signaling and trafficking; Regulates cell and organ shapes | <i>Impaired cell-to-cell signaling and trafficking; Impaired regulation of plant organ shape</i> | Bürstenbinder, Katharina, Birgit Möller, Romina Plötner, Gina Stamm, Gerd Hause, Dipannita Mitra, and Steffen Abel. "The IQD family of calmodulin-binding proteins links calcium signaling to microtubules, membrane subdomains, and the nucleus." <i>Plant physiology</i> 173, no. 3 (2017): 1692-1708.                                                                                              |
| <i>Solyc06g062580.3</i> | -1.10 | beta-galactosidase-like                    | BGAL1   | Involved in carbohydrate metabolic process                                                                                                                         | <i>Impaired carbohydrate metabolism</i>                                                          | Cartieaux, Fabienne, Céline Contesto, Adrien Gallou, Guilhem Desbrosses, Joachim Kopka, Ludivine Tacconnat, Jean-Pierre Renou, and Bruno Touraine. "Simultaneous interaction of Arabidopsis thaliana with Bradyrhizobium sp. strain ORS278 and Pseudomonas syringae pv. tomato DC3000 leads to complex transcriptome changes." <i>Molecular plant-microbe interactions</i> 21, no. 2 (2008): 244-259. |

| TomatoID                | DE    | NCBI Protein Name                               | Gene ID   | Uniprot Description                                                                                                                                                                           | Putative Consequences for Infection                                                 | Citation                                                                                                                                                                                                                                                                                                                                                  |
|-------------------------|-------|-------------------------------------------------|-----------|-----------------------------------------------------------------------------------------------------------------------------------------------------------------------------------------------|-------------------------------------------------------------------------------------|-----------------------------------------------------------------------------------------------------------------------------------------------------------------------------------------------------------------------------------------------------------------------------------------------------------------------------------------------------------|
| Solyc03g120790.1        | -1.10 | uncharacterized protein LOC104646538            | N/A       | N/A                                                                                                                                                                                           | N/A                                                                                 | N/A                                                                                                                                                                                                                                                                                                                                                       |
| Solyc12g036650.2        | -1.10 | uncharacterized protein LOC101258832            | N/A       | N/A                                                                                                                                                                                           | N/A                                                                                 | N/A                                                                                                                                                                                                                                                                                                                                                       |
| <i>Solyc12g009300.3</i> | -1.10 | sucrose synthase                                | SUS1      | Sucrose-cleaving enzyme that provides UDP-glucose and fructose for various metabolic pathways                                                                                                 | <i>Impaired sugar metabolism</i>                                                    | Bieniawska, Zuzanna, D. H. Paul Barratt, Andrew P. Garlick, Vera Thole, Nicholas J. Kruger, Cathie Martin, Rita Zrenner, and Alison M. Smith. "Analysis of the sucrose synthase gene family in Arabidopsis." <i>The Plant Journal</i> 49, no. 5 (2007): 810-828.                                                                                          |
| Solyc08g075080.3        | -1.10 | uncharacterized protein LOC101258477 isoform X2 | N/A       | N/A                                                                                                                                                                                           | N/A                                                                                 | N/A                                                                                                                                                                                                                                                                                                                                                       |
| <i>Solyc10g076790.2</i> | -1.09 | auxin transporter-like protein 4                | LAX4      | Carrier protein involved in proton-driven auxin influx                                                                                                                                        | <i>Impaired auxin signaling</i>                                                     | de Billy, Françoise, Cathy Grosjean, Sean May, Malcolm Bennett, and Julie V. Cullimore. "Expression studies on AUX1-like genes in Medicago truncatula suggest that auxin is required at two steps in early nodule development." <i>Molecular Plant-Microbe Interactions</i> 14, no. 3 (2001): 267-277.                                                    |
| Solyc01g020285.1        | -1.09 | N/A                                             | N/A       | N/A                                                                                                                                                                                           | N/A                                                                                 | N/A                                                                                                                                                                                                                                                                                                                                                       |
| <i>Solyc06g071500.3</i> | -1.09 | probable boron transporter 2                    | BOR2      | Boron transporter essential for maintaining the integrity of plants cell walls                                                                                                                | <i>Impaired plant cell wall growth/development</i>                                  | Takano, Junpei, Kyotaro Noguchi, Miho Yasumori, Masaharu Kobayashi, Zofia Gajdos, Kyoko Miwa, Hiroaki Hayashi, Tadakatsu Yoneyama, and Toru Fujiwara. "Arabidopsis boron transporter for xylem loading." <i>Nature</i> 420, no. 6913 (2002): 337-340.                                                                                                     |
| <i>Solyc01g106580.2</i> | -1.08 | probable pectin methylesterase CGR3             | CGR3      | Together with CGR2, required for homogalacturonan pectins (HG) methylesterification in the Golgi apparatus prior to integration into cell walls, essential for general growth and development | <i>Impaired growth and development; Impaired plant cell wall growth/development</i> | M. Weraduwege, Sarathi, Sang-Jin Kim, Luciana Renna, Fransisca C. Anozie, Thomas D. Sharkey, and Federica Brandizzi. "Pectin methylesterification impacts the relationship between photosynthesis and plant growth." <i>Plant Physiology</i> 171, no. 2 (2016): 833-848.                                                                                  |
| Solyc06g083650.3        | -1.08 | GDSL esterase/lipase At5g33370                  | AT5G33370 | Involved in cuticle development; Involved in lipid catabolism                                                                                                                                 | Impaired cuticle development; Impaired lipid catabolism                             | Li-Beisson, Yonghua, et al. "Acyl-lipid metabolism." <i>The Arabidopsis book/American Society of Plant Biologists</i> 11 (2013).                                                                                                                                                                                                                          |
| <i>Solyc08g061930.3</i> | -1.07 | cytokinin oxidase/dehydrogenase-like isoform X2 | CKX2      | Involved in cytokinin catabolism                                                                                                                                                              | <i>Impaired cytokinin catabolism; Impaired plant root/shoot development</i>         | Werner, Tomáš, Václav Motyka, Valérie Laucou, Rafaél Smets, Harry Van Onckelen, and Thomas Schmülling. "Cytokinin-deficient transgenic Arabidopsis plants show multiple developmental alterations indicating opposite functions of cytokinins in the regulation of shoot and root meristem activity." <i>The Plant Cell</i> 15, no. 11 (2003): 2532-2550. |



| TomatoID                | DE    | NCBI Protein Name                                     | Gene ID | Uniprot Description                                                                                                 | Putative Consequences for Infection                    | Citation                                                                                                                                                                                                                                                                                                                                                                                                           |
|-------------------------|-------|-------------------------------------------------------|---------|---------------------------------------------------------------------------------------------------------------------|--------------------------------------------------------|--------------------------------------------------------------------------------------------------------------------------------------------------------------------------------------------------------------------------------------------------------------------------------------------------------------------------------------------------------------------------------------------------------------------|
| <i>Solyc01g017740.1</i> | -1.07 | cytochrome b6                                         | petB    | Component of the cytochrome b6-f complex, which mediates electron transfer between photosystem II and photosystem I | <i>Impaired photosynthesis</i>                         | Felder, Susanne, Karin Meierhoff, Aniruddha P. Sane, Jörg Meurer, Christiane Driemel, Henning Plücker, Petra Klaff, Bernhard Stein, Nicole Bechtold, and Peter Westhoff. "The nucleus-encoded HCF107 gene of Arabidopsis provides a link between intercistronic RNA processing and the accumulation of translation-competent psbH transcripts in chloroplasts." <i>The Plant Cell</i> 13, no. 9 (2001): 2127-2141. |
| <i>Solyc04g081490.3</i> | -1.07 | beta-tubulin                                          | TUBB1   | Tubulin is the major constituent of microtubules                                                                    | <i>Impaired microtubule development</i>                | Cao, Dongni, Hui Cheng, Wei Wu, Hui Meng Soo, and Jinrong Peng. "Gibberellin mobilizes distinct DELLA-dependent transcriptomes to regulate seed germination and floral development in Arabidopsis." <i>Plant physiology</i> 142, no. 2 (2006): 509-525.                                                                                                                                                            |
| <i>Solyc01g080070.3</i> | -1.06 | heavy metal-associated isoprenylated plant protein 33 | HIPP33  | Heavy-metal-binding protein                                                                                         | N/A                                                    | Ascencio-Ibáñez, José Trinidad, Rosangela Sozzani, Tae-Jin Lee, Tzu-Ming Chu, Russell D. Wolfinger, Rino Cella, and Linda Hanley-Bowdoin. "Global analysis of Arabidopsis gene expression uncovers a complex array of changes impacting pathogen response and cell cycle during geminivirus infection." <i>Plant physiology</i> 148, no. 1 (2008): 436-454.                                                        |
| <i>Solyc06g068770.3</i> | -1.06 | probable beta-1,4-xylosyltransferase                  | IRX9H   | Involved in the synthesis of the hemicellulose glucuronoxylan, a major component of secondary cell walls            | <i>Impaired secondary plant cell wall biosynthesis</i> | Lee, Chanhui, Quincy Teng, Wenlin Huang, Ruiqin Zhong, and Zheng-Hua Ye. "The Arabidopsis family GT43 glycosyltransferases form two functionally nonredundant groups essential for the elongation of glucuronoxylan backbone." <i>Plant Physiology</i> 153, no. 2 (2010): 526-541.                                                                                                                                 |
| <i>Solyc04g071990.3</i> | -1.06 | protein GIGANTEA                                      | GI      | Involved in regulation of circadian rhythm and photoperiodic flowering                                              | <i>Impaired circadian clock</i>                        | Huq, Enamul, James M. Tepperman, and Peter H. Quail. "GIGANTEA is a nuclear protein involved in phytochrome signaling in Arabidopsis." <i>Proceedings of the National Academy of Sciences</i> 97, no. 17 (2000): 9789-9794.                                                                                                                                                                                        |
| <i>Solyc04g011850.1</i> | -1.05 | monothiol glutaredoxin-S1-like                        | N/A     | Has protein disulfide oxidoreductase activity                                                                       | N/A                                                    | Sierro, Nicolas, James ND Battey, Sonia Ouadi, Nicolas Bakaher, Lucien Bovet, Adrian Willig, Simon Goepfert, Manuel C. Peitsch, and Nikolai V. Ivanov. "The tobacco genome sequence and its comparison with those of tomato and potato." <i>Nature communications</i> 5, no. 1 (2014): 1-9.                                                                                                                        |
| <i>Solyc03g032040.3</i> | -1.05 | monosaccharide-sensing protein 2-like                 | MSSP2   | Involved in carbohydrate transport                                                                                  | <i>Impaired carbohydrate transport</i>                 | Wormit, Alexandra, Oliver Trentmann, Ingmar Feifer, Christian Lohr, Joachim Tjaden, Stefan Meyer, Ulrike Schmidt, Enrico Martinoia, and H. Ekkehard Neuhaus. "Molecular identification and physiological characterization of a novel monosaccharide transporter from Arabidopsis involved in vacuolar sugar transport." <i>The Plant Cell</i> 18, no. 12 (2006): 3476-3490.                                        |

| TomatoID                | DE    | NCBI Protein Name                                                      | Gene ID | Uniprot Description                                                                                                                                                        | Putative Consequences for Infection                                                                                      | Citation                                                                                                                                                                                                                                                                              |
|-------------------------|-------|------------------------------------------------------------------------|---------|----------------------------------------------------------------------------------------------------------------------------------------------------------------------------|--------------------------------------------------------------------------------------------------------------------------|---------------------------------------------------------------------------------------------------------------------------------------------------------------------------------------------------------------------------------------------------------------------------------------|
| <i>Solyc09g015080.3</i> | -1.05 | patellin-6                                                             | PATL6   | Carrier protein involved in membrane-trafficking associated with cell-plate formation during cytokinesis; Involved in cellular division; Involved in auxin polar transport | <i>Impaired cellular division; Impaired auxin transport</i>                                                              | Zhou, Huapeng, Hongqin Duan, Yunhong Liu, Xia Sun, Jinfeng Zhao, and Honghui Lin. "Patellin protein family functions in plant development and stress response." <i>Journal of plant physiology</i> 234 (2019): 94-97.                                                                 |
| <i>Solyc04g053010.1</i> | -1.04 | auxin-responsive protein SAUR68-like                                   | SAUR68  | Promote auxin-stimulated organ elongation, such as hypocotyls, stamen filaments and petals                                                                                 | <i>Impaired organ elongation; Impaired growth and development; Impaired auxin signaling; Impaired flower development</i> | Zhao, Yunde, Xinhua Dai, Helen E. Blackwell, Stuart L. Schreiber, and Joanne Chory. "SIR1, an upstream component in auxin signaling identified by chemical genetics." <i>Science</i> 301, no. 5636 (2003): 1107-1110.                                                                 |
| <i>Solyc03g095500.3</i> | -1.04 | thioredoxin H4-1                                                       | TRX4    | Thiol-disulfide oxidoreductase involved in the redox regulation of a number of cytosolic enzymes                                                                           | N/A                                                                                                                      | Yamazaki, Daisuke, Ken Motohashi, Takeshi Kasama, Yukichi Hara, and Toru Hisabori. "Target proteins of the cytosolic thioredoxins in Arabidopsis thaliana." <i>Plant and Cell Physiology</i> 45, no. 1 (2004): 18-27.                                                                 |
| <i>Solyc05g012790.3</i> | -1.03 | probable protein S-acyltransferase 22                                  | PAT22   | Palmitoyl acyltransferase                                                                                                                                                  | <i>Impaired signaling and transport</i>                                                                                  | Hemsley, Piers, and Claire Grierson. "S-acylation: dynamic control of plant development and signalling by lipid modification of proteins." In 18th International Conference on Arabidopsis Research (第十八届国际拟南芥大会), pp. 38-38. 中国科学院, 2007.                                            |
| <i>Solyc06g071330.3</i> | -1.03 | xanthine/uracil permease family protein                                | EF_2430 | Has transmembrane transporter activity                                                                                                                                     | N/A                                                                                                                      | Paulsen, Ian T., L. Banerjee, G. S. A. Myers, K. E. Nelson, Rekha Seshadri, Timothy D. Read, Derrick E. Fouts et al. "Role of mobile DNA in the evolution of vancomycin-resistant Enterococcus faecalis." <i>Science</i> 299, no. 5615 (2003): 2071-2074.                             |
| <i>Solyc11g051170.2</i> | -1.02 | ATP synthase CF1 alpha subunit                                         | atpA    | Produces ATP from ADP in the presence of a proton gradient across the membrane; Necessary for defense response to bacteria and cold                                        | <i>Impaired defense against pathogens; Impaired cold tolerance</i>                                                       | Kubis, Sybille, Ramesh Patel, Jonathan Combe, Jocelyn Beédard, Sabina Kovacheva, Kathryn Lilley, Alexander Biehl et al. "Functional specialization amongst the Arabidopsis Toc159 family of chloroplast protein import receptors." <i>The Plant Cell</i> 16, no. 8 (2004): 2059-2077. |
| <i>Solyc11g069270.2</i> | -1.02 | beta-galactosidase 5                                                   | BGAL5   | Involved in carbohydrate metabolic process                                                                                                                                 | <i>Impaired carbohydrate metabolism</i>                                                                                  | Gantulga, Dashzeveg, Yusuf Turan, David R. Bevan, and Asim Esen. "The Arabidopsis At1g45130 and At3g52840 genes encode $\beta$ -galactosidases with activity toward cell wall polysaccharides." <i>Phytochemistry</i> 69, no. 8 (2008): 1661-1670.                                    |
| <i>Solyc02g067360.3</i> | -1.02 | protease Do-like 8, chloroplastic                                      | DEGP8   | Serine protease involved in photosystem II repair                                                                                                                          | <i>Impaired photosynthesis</i>                                                                                           | Giacomelli, Lisa, Andrea Rudella, and Klaas Jan van Wijk. "High light response of the thylakoid proteome in Arabidopsis wild type and the ascorbate-deficient mutant vtc2-2. A comparative proteomics study." <i>Plant Physiology</i> 141, no. 2 (2006): 685-701.                     |
| <i>Solyc05g012510.3</i> | -1.01 | alpha-1,4 glucan phosphorylase L-2 isozyme, chloroplastic/amyloplastic | N/A     | Important allosteric enzyme in carbohydrate metabolism                                                                                                                     | <i>Impaired carbohydrate metabolism</i>                                                                                  | Lin, Chi-Tsai, Kai-Wun Yeh, Ping-Du Lee, and Jong-Ching Su. "Primary structure of sweet potato starch phosphorylase deduced from its cDNA sequence." <i>Plant physiology</i> 95, no. 4 (1991): 1250-1253.                                                                             |

| TomatoID                | DE    | NCBI Protein Name                                                                  | Gene ID | Uniprot Description                                                                                                               | Putative Consequences for Infection                                    | Citation                                                                                                                                                                                                                                                                                                                                                                   |
|-------------------------|-------|------------------------------------------------------------------------------------|---------|-----------------------------------------------------------------------------------------------------------------------------------|------------------------------------------------------------------------|----------------------------------------------------------------------------------------------------------------------------------------------------------------------------------------------------------------------------------------------------------------------------------------------------------------------------------------------------------------------------|
| <i>Solyc04g012030.3</i> | -1.01 | DHHC-type zinc finger family protein                                               | dhhc-4  | Involved in peptidyl-L-cysteine S-palmitoylation                                                                                  | <i>Impaired signaling and transport</i>                                | McKay, S. J., R. Johnsen, J. Khattra, J. Asano, D. L. Baillie, S. Chan, N. Dube et al. "Gene expression profiling of cells, tissues, and developmental stages of the nematode <i>C. elegans</i> ." In Cold Spring Harbor symposia on quantitative biology, vol. 68, pp. 159-170. Cold Spring Harbor Laboratory Press, 2003.                                                |
| <i>Solyc12g037930.2</i> | -1.01 | N/A                                                                                | N/A     | N/A                                                                                                                               | N/A                                                                    | N/A                                                                                                                                                                                                                                                                                                                                                                        |
| <i>Solyc12g008490.2</i> | -1.01 | uncharacterized protein LOC101259712 isoform X2                                    | N/A     | N/A                                                                                                                               | N/A                                                                    | N/A                                                                                                                                                                                                                                                                                                                                                                        |
| <i>Solyc09g015170.3</i> | -1.00 | probably inactive leucine-rich repeat receptor-like protein kinase IMK2 isoform X2 | IMK2    | Protein kinase activity                                                                                                           | N/A                                                                    | Shahollari, Bationa, Ajit Varma, and Ralf Oelmüller. "Expression of a receptor kinase in <i>Arabidopsis</i> roots is stimulated by the basidiomycete <i>Piriformospora indica</i> and the protein accumulates in Triton X-100 insoluble plasma membrane microdomains." <i>Journal of plant physiology</i> 162, no. 8 (2005): 945-958.                                      |
| <i>Solyc02g085870.3</i> | 1.00  | 3-ketoacyl-CoA synthase 6                                                          | CUT1    | Major condensing enzyme for stem wax and pollen coat lipid biosynthesis                                                           | <i>Increased wax and pollen coat biosynthesis; Cell wall expansion</i> | Kunst, Ljerka, and A. Lacey Samuels. "Biosynthesis and secretion of plant cuticular wax." <i>Progress in lipid research</i> 42, no. 1 (2003): 51-80.                                                                                                                                                                                                                       |
| <i>Solyc05g007900.2</i> | 1.01  | E3 ubiquitin-protein ligase MPSR1                                                  | MPSR1   | E3 ubiquitin-protein ligase involved in protein quality control under proteotoxic stress                                          | <i>Increased E3 ubiquitination during proteotoxic stress</i>           | Kim, Jong Hum, Seok Keun Cho, Tae Rin Oh, Moon Young Ryu, Seong Wook Yang, and Woo Taek Kim. "MPSR1 is a cytoplasmic PQC E3 ligase for eliminating emergent misfolded proteins in <i>Arabidopsis thaliana</i> ." <i>Proceedings of the National Academy of Sciences</i> 114, no. 46 (2017): E10009-E10017.                                                                 |
| <i>Solyc06g075310.3</i> | 1.02  | adenylate kinase isoenzyme 6 homolog isoform X1                                    | AAK6    | Kinase that catalyzes the reversible transfer of the terminal phosphate group between nucleoside triphosphates and monophosphates | <i>Promoted stem growth</i>                                            | Feng, Xue, Ruonan Yang, Xiaofeng Zheng, and FeiYun Zhang. "Identification of a novel nuclear-localized adenylate kinase 6 from <i>Arabidopsis thaliana</i> as an essential stem growth factor." <i>Plant physiology and biochemistry</i> 61 (2012): 180-186.                                                                                                               |
| <i>Solyc06g061240.3</i> | 1.04  | uncharacterized protein LOC101268004                                               | N/A     | N/A                                                                                                                               | N/A                                                                    | N/A                                                                                                                                                                                                                                                                                                                                                                        |
| <i>Solyc01g007190.3</i> | 1.04  | uncharacterized protein LOC101262645                                               | N/A     | N/A                                                                                                                               | N/A                                                                    | N/A                                                                                                                                                                                                                                                                                                                                                                        |
| <i>Solyc03g082550.3</i> | 1.04  | N/A                                                                                | N/A     | N/A                                                                                                                               | N/A                                                                    | N/A                                                                                                                                                                                                                                                                                                                                                                        |
| <i>Solyc12g099900.1</i> | 1.05  | scarecrow-like protein 3                                                           | SCL3    | Transcription factor involved in plant development                                                                                | <i>Promoted plant growth and development</i>                           | Zhang, Zhong-Lin, Mikihiro Ogawa, Christine M. Fleet, Rodolfo Zentella, Jianhong Hu, Jung-Ok Heo, Jun Lim, Yuji Kamiya, Shinjiro Yamaguchi, and Tai-ping Sun. "Scarecrow-like 3 promotes gibberellin signaling by antagonizing master growth repressor DELLA in <i>Arabidopsis</i> ." <i>Proceedings of the National Academy of Sciences</i> 108, no. 5 (2011): 2160-2165. |

| TomatoID                | DE   | NCBI Protein Name                                                       | Gene ID   | Uniprot Description                                                                                                            | Putative Consequences for Infection                                             | Citation                                                                                                                                                                                                                                                                                                                         |
|-------------------------|------|-------------------------------------------------------------------------|-----------|--------------------------------------------------------------------------------------------------------------------------------|---------------------------------------------------------------------------------|----------------------------------------------------------------------------------------------------------------------------------------------------------------------------------------------------------------------------------------------------------------------------------------------------------------------------------|
| Solyc07g043550.3        | 1.05 | UDP-arabinose 4-epimerase 1                                             | MUR4      | Acts as a UDP-D-xylose 4-epimerase                                                                                             | N/A                                                                             | Mølholm, Michael, Rajeev Verma, and Wolf-Dieter Reiter. "The biosynthesis of D-Galacturonate in plants. functional cloning and characterization of a membrane-anchored UDP-D-Glucuronate 4-epimerase from Arabidopsis." <i>Plant Physiology</i> 135, no. 3 (2004): 1221-1230.                                                    |
| <i>Solyc07g032480.3</i> | 1.06 | cyclin-T1-3                                                             | CYCT1-3   | Involved in cellular division; Positive regulator of DNA-templated transcription; Regulates transcription of RNA polymerase II | <i>Promoted cellular division; Increased DNA-templated transcription</i>        | Cui, Xiaofeng, Baofang Fan, James Scholz, and Zhixiang Chen. "Roles of Arabidopsis cyclin-dependent kinase C complexes in cauliflower mosaic virus infection, plant growth, and development." <i>The Plant Cell</i> 19, no. 4 (2007): 1388-1402.                                                                                 |
| Solyc02g078380.3        | 1.07 | stem-specific protein TSJT1                                             | TSJT1     | N/A                                                                                                                            | N/A                                                                             | N/A                                                                                                                                                                                                                                                                                                                              |
| Solyc07g053130.3        | 1.07 | G-type lectin S-receptor-like serine/threonine-protein kinase At4g03230 | At4g03230 | Involved in protein phosphorylation; Involved in pollen recognition                                                            | Promoted pollen recognition                                                     | Cheng, Chia-Yi, Vivek Krishnakumar, Agnes P. Chan, Françoise Thibaud-Nissen, Seth Schobel, and Christopher D. Town. "Araport11: a complete reannotation of the Arabidopsis thaliana reference genome." <i>The Plant Journal</i> 89, no. 4 (2017): 789-804.                                                                       |
| <i>Solyc02g077080.3</i> | 1.07 | protein trichome birefringence-like 38                                  | TBL38     | Bridging protein that binds pectin and other cell wall polysaccharides                                                         | <i>Promoted pectin-binding; Promoted plant cell wall growth and development</i> | Bischoff, Volker, Joachim Selbig, and Wolf-Rüdiger Scheible. "Involvement of TBL/DUF231 proteins into cell wall biology." <i>Plant signaling &amp; behavior</i> 5, no. 8 (2010): 1057-1059.                                                                                                                                      |
| Solyc07g044980.3        | 1.07 | NIM1-like protein 2 isoform X2                                          | N/A       | N/A                                                                                                                            | N/A                                                                             | N/A                                                                                                                                                                                                                                                                                                                              |
| Solyc12g011230.1        | 1.08 | N/A                                                                     | N/A       | N/A                                                                                                                            | N/A                                                                             | N/A                                                                                                                                                                                                                                                                                                                              |
| <i>Solyc07g006130.2</i> | 1.08 | eukaryotic peptide chain release factor subunit 1-3-like                | ERF1-3    | Directs the termination of nascent peptide synthesis; Modulates plant growth and development                                   | <i>Promoted plant growth and development</i>                                    | Chapman, Bernice, and Chris Brown. "Translation termination in Arabidopsis thaliana: characterisation of three versions of release factor 1." <i>Gene</i> 341 (2004): 219-225.                                                                                                                                                   |
| Solyc04g074850.3        | 1.09 | putative polyprotein                                                    | T8L23.26  | Involved in DNA integration                                                                                                    | Increased DNA integration                                                       | Theologis, Athanasios, Joseph R. Ecker, Curtis J. Palm, Nancy A. Federspiel, Samir Kaul, Owen White, Jose Alonso et al. "Sequence and analysis of chromosome 1 of the plant Arabidopsis thaliana." <i>Nature</i> 408, no. 6814 (2000): 816-820.                                                                                  |
| <i>Solyc01g086870.3</i> | 1.09 | transcription factor bHLH130                                            | BHLH130   | Involved in photoperiodism, flowering; Transcription regulator                                                                 | <i>Promoted photoperiodism</i>                                                  | Takahashi, Yohei, Yuta Ebisu, Toshinori Kinoshita, Michio Doi, Eiji Okuma, Yoshiyuki Murata, and Ken-ichiro Shimazaki. "bHLH transcription factors that facilitate K <sup>+</sup> uptake during stomatal opening are repressed by abscisic acid through phosphorylation." <i>Science Signaling</i> 6, no. 280 (2013): ra48-ra48. |
| Solyc07g017610.3        | 1.10 | alpha-aminoadipic semialdehyde synthase                                 | LKR/SDH   | Bifunctional enzyme that catalyzes the first two steps in lysine degradation                                                   | Promoted lysine degradation                                                     | Tang, Guiliang, Daphna Miron, Judith X. Zhu-Shimoni, and Gad Galili. "Regulation of lysine catabolism through lysine-ketoglutarate reductase and saccharopine dehydrogenase in Arabidopsis." <i>The Plant Cell</i> 9, no. 8 (1997): 1305-1316.                                                                                   |

| TomatoID                | DE   | NCBI Protein Name                                | Gene ID | Uniprot Description                                                                                                                                                                            | Putative Consequences for Infection                                                                                                        | Citation                                                                                                                                                                                                                                                                                                                                               |
|-------------------------|------|--------------------------------------------------|---------|------------------------------------------------------------------------------------------------------------------------------------------------------------------------------------------------|--------------------------------------------------------------------------------------------------------------------------------------------|--------------------------------------------------------------------------------------------------------------------------------------------------------------------------------------------------------------------------------------------------------------------------------------------------------------------------------------------------------|
| <i>Solyc05g052050.1</i> | 1.10 | DNA-binding protein Pti4                         | Pti4    | Transcription factor involved in defense                                                                                                                                                       | <i>Promoted defense</i>                                                                                                                    | Gu, Yong-Qiang, Mary C. Wildermuth, Suma Chakravarthy, Ying-Tsu Loh, Caimei Yang, Xiaohua He, Yu Han, and Gregory B. Martin. "Tomato transcription factors Pti4, Pti5, and Pti6 activate defense responses when expressed in Arabidopsis." <i>The Plant Cell</i> 14, no. 4 (2002): 817-831.                                                            |
| <i>Solyc02g084950.3</i> | 1.11 | jasmonate O-methyltransferase isoform X2         | JMT     | Catalyzes the methylation of jasmonate into methyljasmonate, a plant volatile that acts as an important cellular regulator mediating diverse developmental processes and defense responses     | <i>Promoted methyljasmonate-regulated signaling; Promoted defense</i>                                                                      | Seo, Hak Soo, Jong Tae Song, Jong-woo Cheong, Yong-Hwan Lee, Yin-Won Lee, Ingyu Hwang, Jong Seob Lee, and Yang Do Choi. "Jasmonic acid carboxyl methyltransferase: a key enzyme for jasmonate-regulated plant responses." <i>Proceedings of the National Academy of Sciences</i> 98, no. 8 (2001): 4788-4793.                                          |
| <i>Solyc04g071600.3</i> | 1.11 | abscisic stress-ripening protein 3-like          | ASR3    | N/A                                                                                                                                                                                            | N/A                                                                                                                                        | Gilad, A., Amitai-Zeigerson, H., Bar-Zvi, D. and Scolnik, P.A., 1996, June. ASR1, a tomato water-stress regulated gene: genomic organization, developmental regulation and DNA-binding activity. In III International Symposium on In Vitro Culture and Horticultural Breeding 447 (pp. 447-454).                                                      |
| <i>Solyc05g007880.3</i> | 1.12 | cyclic dof factor 1 isoform X1                   | CDF1    | Regulates a photoperiodic flowering response; Transcriptional repressor of 'CONSTANS' expression                                                                                               | <i>Promoted photoperiodic flowering response; Increased repression of CONSTANS expression</i>                                              | Imazumi, Takato, et al. "FKF1 F-box protein mediates cyclic degradation of a repressor of CONSTANS in Arabidopsis." <i>Science</i> 309.5732 (2005): 293-297.                                                                                                                                                                                           |
| <i>Solyc01g099910.3</i> | 1.12 | uncharacterized protein LOC101259675             | N/A     | N/A                                                                                                                                                                                            | N/A                                                                                                                                        | N/A                                                                                                                                                                                                                                                                                                                                                    |
| <i>Solyc02g084430.3</i> | 1.12 | B-box zinc finger protein 19                     | BBX19   | Negative regulator of seedling photomorphogenesis                                                                                                                                              | <i>Promoted seedling photomorphogenesis</i>                                                                                                | Kumagai, Takeshi, Shogo Ito, Norihito Nakamichi, Yusuke Niwa, Masaya Murakami, Takafumi Yamashino, and Takeshi Mizuno. "The common function of a novel subfamily of B-Box zinc finger proteins with reference to circadian-associated events in Arabidopsis thaliana." <i>Bioscience, biotechnology, and biochemistry</i> 72, no. 6 (2008): 1539-1549. |
| <i>Solyc10g080670.2</i> | 1.13 | uncharacterized protein LOC101267365             | N/A     | N/A                                                                                                                                                                                            | N/A                                                                                                                                        | N/A                                                                                                                                                                                                                                                                                                                                                    |
| <i>Solyc11g066060.2</i> | 1.14 | heat shock cognate 70 kDa protein 2-like         | HSP70-2 | Facilitate folding of de novo synthesized proteins, assist translocation of precursor proteins into organelles, and are responsible for degradation of damaged protein under stress conditions | <i>Promoted folding of de novo synthesized proteins; Promoted protein transport; Promoted degradation of damaged proteins under stress</i> | Hilson, Pierre, Joke Allemeersch, Thomas Altmann, Sébastien Aubourg, Alexandra Avon, Jim Beynon, Rishikesh P. Bhalerao et al. "Versatile gene-specific sequence tags for Arabidopsis functional genomics: transcript profiling and reverse genetics applications." <i>Genome research</i> 14, no. 10b (2004): 2176-2189.                               |
| <i>Solyc05g008110.3</i> | 1.14 | wiskott-Aldrich syndrome protein family member 2 | N/A     | N/A                                                                                                                                                                                            | N/A                                                                                                                                        | N/A                                                                                                                                                                                                                                                                                                                                                    |

| TomatoID                | DE   | NCBI Protein Name                                             | Gene ID | Uniprot Description                                                                                                                                                                                                                                                                       | Putative Consequences for Infection                                                                                                                                    | Citation                                                                                                                                                                                                                                                                                                                                                                                                 |
|-------------------------|------|---------------------------------------------------------------|---------|-------------------------------------------------------------------------------------------------------------------------------------------------------------------------------------------------------------------------------------------------------------------------------------------|------------------------------------------------------------------------------------------------------------------------------------------------------------------------|----------------------------------------------------------------------------------------------------------------------------------------------------------------------------------------------------------------------------------------------------------------------------------------------------------------------------------------------------------------------------------------------------------|
| <i>Solyc05g046290.3</i> | 1.14 | probable xyloglucan endotransglucosylase/hydrolase protein 23 | XTH23   | Cleaves and religates xyloglucan polymers, an essential constituent of the primary cell wall, and thereby participates in cell wall construction of growing tissues                                                                                                                       | <i>Promoted plant growth and development</i>                                                                                                                           | Bischoff, Volker, Sarah Jane Cookson, Shuang Wu, and Wolf-Rüdiger Scheible. "Thaxtomin A affects CESA-complex density, expression of cell wall genes, cell wall composition, and causes ectopic lignification in <i>Arabidopsis thaliana</i> seedlings." <i>Journal of experimental botany</i> 60, no. 3 (2009): 955-965.                                                                                |
| <i>Solyc01g111640.3</i> | 1.14 | SKP1-like protein 1A                                          | SKP1A   | Involved in proteinubiquitination; Required for vegetative and floral organ development as well as for male gametogenesis; Involved in auxin signaling pathway; Regulates responses to jasmonates; Involved in light-signaling and the circadian clock; Plays a role during embryogenesis | <i>Promoted protein ubiquitination; Promoted floral development and male gametogenesis; Promoted auxin signaling; Promoted circadian clock; Promoted embryogenesis</i> | Zhao, Dazhong, Weimin Ni, Baomin Feng, Tianfu Han, Megan G. Petrasek, and Hong Ma. "Members of the <i>Arabidopsis</i> -SKP1-like gene family exhibit a variety of expression patterns and may play diverse roles in <i>Arabidopsis</i> ." <i>Plant physiology</i> 133, no. 1 (2003): 203-217.                                                                                                            |
| <i>Solyc11g045465.1</i> | 1.14 | N/A                                                           | N/A     | N/A                                                                                                                                                                                                                                                                                       | N/A                                                                                                                                                                    | N/A                                                                                                                                                                                                                                                                                                                                                                                                      |
| <i>Solyc11g007510.2</i> | 1.16 | uncharacterized protein LOC101251943                          | N/A     | N/A                                                                                                                                                                                                                                                                                       | N/A                                                                                                                                                                    | N/A                                                                                                                                                                                                                                                                                                                                                                                                      |
| <i>Solyc02g063360.3</i> | 1.16 | protein C2-DOMAIN ABA-RELATED 1                               | CAR1    | Mediates the transient calcium-dependent interaction of PYR/PYL/RCAR abscisic acid receptors with the plasma membrane                                                                                                                                                                     | <i>Promoted abscisic acid signaling</i>                                                                                                                                | Rodriguez, Lesia, Miguel Gonzalez-Guzman, Maira Diaz, Americo Rodriguez, Ana C. Izquierdo-Garcia, Marta Peirats-Llobet, Maria A. Fernandez et al. "C2-domain abscisic acid-related proteins mediate the interaction of PYR/PYL/RCAR abscisic acid receptors with the plasma membrane and regulate abscisic acid sensitivity in <i>Arabidopsis</i> ." <i>The Plant Cell</i> 26, no. 12 (2014): 4802-4820. |
| <i>Solyc12g009560.2</i> | 1.18 | EIN3-binding F-box protein 1                                  | EBF1    | Component of ubiquitin ligase complexes, which mediate the ubiquitination and subsequent proteasomal degradation of target proteins; Regulates ethylene signaling cascade                                                                                                                 | <i>Promoted protein ubiquitination</i>                                                                                                                                 | Gagne, Jennifer M., Jan Smalle, Derek J. Gingerich, Joseph M. Walker, Sang-Dong Yoo, Shuichi Yanagisawa, and Richard D. Vierstra. "Arabidopsis EIN3-binding F-box 1 and 2 form ubiquitin-protein ligases that repress ethylene action and promote growth by directing EIN3 degradation." <i>Proceedings of the National Academy of Sciences</i> 101, no. 17 (2004): 6803-6808.                           |
| <i>Solyc12g088370.2</i> | 1.18 | N/A                                                           | N/A     | N/A                                                                                                                                                                                                                                                                                       | N/A                                                                                                                                                                    | N/A                                                                                                                                                                                                                                                                                                                                                                                                      |
| <i>Solyc07g042550.3</i> | 1.19 | sucrose synthase                                              | SUS1    | Sucrose-cleaving enzyme that provides UDP-glucose and fructose for various metabolic pathways                                                                                                                                                                                             | <i>Promoted sugar metabolism</i>                                                                                                                                       | Bieniawska, Zuzanna, D. H. Paul Barratt, Andrew P. Garlick, Vera Thole, Nicholas J. Kruger, Cathie Martin, Rita Zrenner, and Alison M. Smith. "Analysis of the sucrose synthase gene family in <i>Arabidopsis</i> ." <i>The Plant Journal</i> 49, no. 5 (2007): 810-828.                                                                                                                                 |
| <i>Solyc08g082740.3</i> | 1.19 | signal recognition particle 19 kDa protein                    | SRP19   | Part of the signal-recognition-particle assembly, binds directly to 7S RNA and mediates binding of the 54 kDa subunit of the SRP                                                                                                                                                          | <i>Promoted cell-to-cell signaling</i>                                                                                                                                 | Wang, Yi, Wen-Zheng Zhang, Lian-Fen Song, Jun-Jie Zou, Zhen Su, and Wei-Hua Wu. "Transcriptome analyses show changes in gene expression to accompany pollen germination and tube growth in <i>Arabidopsis</i> ." <i>Plant physiology</i> 148, no. 3 (2008): 1201-1211.                                                                                                                                   |

| TomatoID                | DE   | NCBI Protein Name                                 | Gene ID  | Uniprot Description                                                                                                                                                                  | Putative Consequences for Infection                               | Citation                                                                                                                                                                                                                                                                                                        |
|-------------------------|------|---------------------------------------------------|----------|--------------------------------------------------------------------------------------------------------------------------------------------------------------------------------------|-------------------------------------------------------------------|-----------------------------------------------------------------------------------------------------------------------------------------------------------------------------------------------------------------------------------------------------------------------------------------------------------------|
| <i>Solyc10g051230.1</i> | 1.19 | receptor-like protein Cf-9                        | CF-9     | Involved in plant defense against fungal pathogens                                                                                                                                   | <i>Promoted defense against fungi</i>                             | Jones, David A., Colwyn M. Thomas, Kim E. Hammond-Kosack, Peter J. Balint-Kurti, and J. D. Jones. "Isolation of the tomato Cf-9 gene for resistance to <i>Cladosporium fulvum</i> by transposon tagging." <i>Science</i> 266, no. 5186 (1994): 789-793.                                                         |
| <i>Solyc12g015880.2</i> | 1.19 | molecular chaperone Hsp90-1                       | N/A      | N/A                                                                                                                                                                                  | N/A                                                               | N/A                                                                                                                                                                                                                                                                                                             |
| <i>Solyc07g054470.1</i> | 1.20 | uncharacterized protein LOC101259953              | N/A      | N/A                                                                                                                                                                                  | N/A                                                               | N/A                                                                                                                                                                                                                                                                                                             |
| <i>Solyc07g006590.1</i> | 1.20 | uncharacterized protein LOC101265142              | N/A      | N/A                                                                                                                                                                                  | N/A                                                               | N/A                                                                                                                                                                                                                                                                                                             |
| <i>Solyc09g092480.1</i> | 1.20 | crocetin glucosyltransferase, chloroplastic       | UGT75L6  | UDP-glycosyltransferase activity                                                                                                                                                     | N/A                                                               | Nagatoshi, Mai, Kazuyoshi Terasaka, Miki Owaki, Makiko Sota, Tatsunori Inukai, Akito Nagatsu, and Hajime Mizukami. "UGT75L6 and UGT94E5 mediate sequential glucosylation of crocetin to crocin in <i>Gardenia jasminoides</i> ." <i>FEBS letters</i> 586, no. 7 (2012): 1055-1061.                              |
| <i>Solyc04g005610.3</i> | 1.21 | NAC domain-containing protein 2                   | N/A      | N/A                                                                                                                                                                                  | N/A                                                               | N/A                                                                                                                                                                                                                                                                                                             |
| <i>Solyc02g075625.1</i> | 1.21 | N/A                                               | N/A      | N/A                                                                                                                                                                                  | N/A                                                               | N/A                                                                                                                                                                                                                                                                                                             |
| <i>Solyc03g114960.3</i> | 1.22 | tip elongation aberrant protein 1 isoform X2      | tea1     | Acts as an end marker, directing the growth machinery to the cell poles; Involved in the regulation of microtubular organization, affecting the maintenance of a single central axis | <i>Promoted cell elongation; Promoted microtubule development</i> | Mata, Juan, and Paul Nurse. "tea1 and the microtubular cytoskeleton are important for generating global spatial order within the fission yeast cell." <i>Cell</i> 89, no. 6 (1997): 939-949.                                                                                                                    |
| <i>Solyc03g116900.3</i> | 1.23 | metal transporter Nramp6                          | NRAMP6   | Intracellular cadmium transporter that participates in the distribution or availability of Cd within the cell                                                                        | Promoted Cd homeostasis                                           | Cailliatte, Rémy, Bruno Lapeyre, Jean-François Briat, Stéphane Mari, and Catherine Curie. "The NRAMP6 metal transporter contributes to cadmium toxicity." <i>Biochemical Journal</i> 422, no. 2 (2009): 217-228.                                                                                                |
| <i>Solyc06g008870.2</i> | 1.26 | gibberellin receptor GID1b-2                      | GID1B    | Soluble gibberellin GA receptor; Regulates growth and development                                                                                                                    | <i>Promoted growth/development</i>                                | Griffiths, Jayne, Kohji Murase, Ivo Rieu, Rodolfo Zentella, Zhong-Lin Zhang, Stephen J. Powers, Fan Gong et al. "Genetic characterization and functional analysis of the GID1 gibberellin receptors in <i>Arabidopsis</i> ." <i>The Plant Cell</i> 18, no. 12 (2006): 3399-3414.                                |
| <i>Solyc07g043310.3</i> | 1.27 | gamma aminobutyrate transaminase 1, mitochondrial | GABA-TP1 | Transaminase that degrades GABA and uses pyruvate or glyoxylate as amino-group acceptor                                                                                              | <i>Promoted signaling turnover</i>                                | Clark, Shawn M., Rosa Di Leo, Owen R. Van Cauwenberghe, Robert T. Mullen, and Barry J. Shelp. "Subcellular localization and expression of multiple tomato $\gamma$ -aminobutyrate transaminases that utilize both pyruvate and glyoxylate." <i>Journal of experimental botany</i> 60, no. 11 (2009): 3255-3267. |
| <i>Solyc04g076010.3</i> | 1.28 | uncharacterized protein LOC101247909              | N/A      | N/A                                                                                                                                                                                  | N/A                                                               | N/A                                                                                                                                                                                                                                                                                                             |

| TomatoID                | DE   | NCBI Protein Name                                 | Gene ID      | Uniprot Description                                                                                                                                       | Putative Consequences for Infection                                                                                                   | Citation                                                                                                                                                                                                                                                                                                                                 |
|-------------------------|------|---------------------------------------------------|--------------|-----------------------------------------------------------------------------------------------------------------------------------------------------------|---------------------------------------------------------------------------------------------------------------------------------------|------------------------------------------------------------------------------------------------------------------------------------------------------------------------------------------------------------------------------------------------------------------------------------------------------------------------------------------|
| Solyc09g075020.3        | 1.29 | ABC transporter C family member 4                 | ABCC4        | Involved in the regulation of stomatal aperture; High-capacity pump for folates                                                                           | Promoted stomatal aperture regulation                                                                                                 | Klein, Markus, Markus Geisler, Su Jeoung Suh, H. Üner Kolukisaoglu, Louis Azevedo, Sonia Plaza, Mark D. Curtis et al. "Disruption of AtMRP4, a guard cell plasma membrane ABC-type ABC transporter, leads to deregulation of stomatal opening and increased drought susceptibility." <i>The Plant Journal</i> 39, no. 2 (2004): 219-236. |
| <i>Solyc01g105620.3</i> | 1.30 | RING-H2 finger protein ATL54-like                 | LOC109001200 | This protein is involved in the pathway protein ubiquitination, which is part of Protein modification                                                     | <i>Promoted protein ubiquitination</i>                                                                                                | Martínez-García, Pedro J., Marc W. Crepeau, Daniela Puiu, Daniel Gonzalez-Ibeas, Jeanne Whalen, Kristian A. Stevens, Robin Paul et al. "The walnut ( <i>Juglans regia</i> ) genome sequence reveals diversity in genes coding for the biosynthesis of non-structural polyphenols." <i>The Plant Journal</i> 87, no. 5 (2016): 507-532.   |
| Solyc03g116630.3        | 1.30 | uncharacterized protein LOC101253674              | N/A          | N/A                                                                                                                                                       | N/A                                                                                                                                   | N/A                                                                                                                                                                                                                                                                                                                                      |
| Solyc12g096130.2        | 1.31 | N/A                                               | N/A          | N/A                                                                                                                                                       | N/A                                                                                                                                   | N/A                                                                                                                                                                                                                                                                                                                                      |
| <i>Solyc12g096610.2</i> | 1.32 | poly(ADP-ribose) glycohydrolase 1-like isoform X3 | PARG1        | Involved in establishing period length of the circadian oscillator; Involved in defense against fungus; Involved in response to osmotic and water stress  | <i>Promoted circadian clock; Promoted defense against fungi; Promoted drought tolerance; Increased defense against osmotic stress</i> | Panda, Satchidananda, Guy G. Poirier, and Steve A. Kay. "tej defines a role for poly (ADP-ribosyl) ation in establishing period length of the Arabidopsis circadian oscillator." <i>Developmental cell</i> 3, no. 1 (2002): 51-61.                                                                                                       |
| <i>Solyc11g008530.2</i> | 1.33 | endoribonuclease Dicer 2d isoform X1              | AT3G03300    | Plays an essential role in transitive silencing of transgenes by processing secondary siRNAs; Plays a role in antiviral RNA silencing                     | <i>Promoted post-transcriptional gene silencing; Promoted defense against viral pathogens</i>                                         | "DICER-LIKE2 plays a primary role in transitive silencing of transgenes in Arabidopsis."                                                                                                                                                                                                                                                 |
| <i>Solyc12g096600.2</i> | 1.34 | poly(ADP-ribose) glycohydrolase 1-like isoform X4 | PARG1        | Involved in establishing period length of the circadian oscillator; Involved in deefense against fungus; Involved in response to osmotic and water stress | <i>Promoted circadian clock; Promoted defense against fungi; Promoted drought tolerance; Increased defense against osmotic stress</i> | Panda, Satchidananda, Guy G. Poirier, and Steve A. Kay. "tej defines a role for poly (ADP-ribosyl) ation in establishing period length of the Arabidopsis circadian oscillator." <i>Developmental cell</i> 3, no. 1 (2002): 51-61.                                                                                                       |
| Solyc05g013660.3        | 1.36 | uncharacterized protein LOC101244185 isoform X1   | N/A          | N/A                                                                                                                                                       | N/A                                                                                                                                   | N/A                                                                                                                                                                                                                                                                                                                                      |
| <i>Solyc09g059040.3</i> | 1.37 | fructose-bisphosphate aldolase                    | FBA1         | Plays a key role in glycolysis and gluconeogenesis                                                                                                        | <i>Promoted glycolysis and gluconeogenesis</i>                                                                                        | Searle, Iain R., Artem E. Men, Titeki S. Laniya, Diana M. Buzas, Inaki Iturbe-Ormaetxe, Bernard J. Carroll, and Peter M. Gresshoff. "Long-distance signaling in nodulation directed by a CLAVATA1-like receptor kinase." <i>Science</i> 299, no. 5603 (2003): 109-112.                                                                   |
| Solyc06g073990.2        | 1.37 | uncharacterized protein LOC101253518              | N/A          | N/A                                                                                                                                                       | N/A                                                                                                                                   | N/A                                                                                                                                                                                                                                                                                                                                      |



| TomatoID                | DE   | NCBI Protein Name                                   | Gene ID | Uniprot Description                                                                                                                                                                                   | Putative Consequences for Infection                                                                                                                                                                    | Citation                                                                                                                                                                                                                                                                                                                                                           |
|-------------------------|------|-----------------------------------------------------|---------|-------------------------------------------------------------------------------------------------------------------------------------------------------------------------------------------------------|--------------------------------------------------------------------------------------------------------------------------------------------------------------------------------------------------------|--------------------------------------------------------------------------------------------------------------------------------------------------------------------------------------------------------------------------------------------------------------------------------------------------------------------------------------------------------------------|
| <i>Solyc03g113430.3</i> | 1.37 | protein NRT1/ PTR FAMILY 2.11                       | NPF2.11 | High-affinity, proton-dependent glucosinolate-specific transporter; Involved in removal of glucosinolates from the xylem in roots                                                                     | <i>Promoted glucosinolate homeostasis</i>                                                                                                                                                              | Nour-Eldin, Hussam Hassan, Tonni Grube Andersen, Meike Burow, Svend Roesen Madsen, Morten Egevang Jørgensen, Carl Erik Olsen, Ingo Dreyer, Rainer Hedrich, Dietmar Geiger, and Barbara Ann Halkier. "NRT/PTR transporters are essential for translocation of glucosinolate defence compounds to seeds." <i>Nature</i> 488, no. 7412 (2012): 531-534.               |
| <i>Solyc07g065320.3</i> | 1.41 | ABC transporter C family member 3                   | ABCC3   | Pump for glutathione S-conjugates and chlorophyll catabolites; Heavy metal transporter                                                                                                                | Increased glutathione S-conjugate and chlorophyll catabolite transport; Increased heavy metal transport                                                                                                | Tommasini, Roberto, Esther Vogt, Myriam Fromenteau, Stefan Hörtensteiner, Philippe Matile, Nikolaus Amrhein, and Enrico Martinoia. "An ABC-transporter of <i>Arabidopsis thaliana</i> has both glutathione-conjugate and chlorophyll catabolite transport activity." <i>The Plant Journal</i> 13, no. 6 (1998): 773-780.                                           |
| <i>Solyc11g010380.2</i> | 1.41 | protein DETOXIFICATION 27                           | DTX27   | Has xenobiotic transmembrane transporter activity                                                                                                                                                     | <i>Promoted xenobiotic transport</i>                                                                                                                                                                   | Ascencio-Ibáñez, José Trinidad, Rosangela Sozzani, Tae-Jin Lee, Tzu-Ming Chu, Russell D. Wolfinger, Rino Cella, and Linda Hanley-Bowdoin. "Global analysis of <i>Arabidopsis</i> gene expression uncovers a complex array of changes impacting pathogen response and cell cycle during geminivirus infection." <i>Plant physiology</i> 148, no. 1 (2008): 436-454. |
| <i>Solyc02g077590.1</i> | 1.42 | homeobox-leucine zipper protein ATHB-52             | ATHB-52 | Transcription factor                                                                                                                                                                                  | N/A                                                                                                                                                                                                    | Fleury, Delphine, Kristiina Himanen, Gerda Cnops, Hilde Nelissen, Tommaso Matteo Boccardi, Steven Maere, Gerrit TS Beemster et al. "The <i>Arabidopsis thaliana</i> homolog of yeast BRE1 has a function in cell cycle regulation during early leaf and root growth." <i>The Plant Cell</i> 19, no. 2 (2007): 417-432.                                             |
| <i>Solyc08g067610.3</i> | 1.45 | pleiotropic drug resistance protein 1-like          | PDR1    | Excretes secondary metabolites such as terpenes; Involved in both constitutive and jasmonic acid-dependent induced defense                                                                            | <i>Increased secondary metabolite excretion; Promoted jasmonic-acid depended induced defense; Promoted constitutive defense</i>                                                                        | Jasiński, Michal, Yvan Stukkens, Hervé Degand, Bénédicte Purnelle, Jacqueline Marchand-Brynaert, and Marc Boutry. "A plant plasma membrane ATP binding cassette-type transporter is involved in antifungal terpenoid secretion." <i>The Plant Cell</i> 13, no. 5 (2001): 1095-1107.                                                                                |
| <i>Solyc04g007980.3</i> | 1.47 | 1-aminocyclopropane-1-carboxylate oxidase homolog 4 | ACO4    | Involved in ethylene biosynthesis; Promotes stem elongation by maximizing the extensibility cells                                                                                                     | <i>Promoted ethylene biosynthesis; Promotes stem elongation and cell extensibility</i>                                                                                                                 | Qin, Yong-Mei, Chun-Yang Hu, Yu Pang, Alexander J. Kastaniotis, J. Kalervo Hiltunen, and Yu-Xian Zhu. "Saturated very-long-chain fatty acids promote cotton fiber and <i>Arabidopsis</i> cell elongation by activating ethylene biosynthesis." <i>The Plant Cell</i> 19, no. 11 (2007): 3692-3704.                                                                 |
| <i>Solyc04g071890.3</i> | 1.47 | peroxidase 12 precursor                             | PER12   | Involved in removal of H <sub>2</sub> O <sub>2</sub> , oxidation of toxic reductants, biosynthesis and degradation of lignin, suberization, auxin catabolism, and response to environmental stressors | <i>Increased removal of H<sub>2</sub>O<sub>2</sub>, oxidation of toxic reductants, biosynthesis and degradation of lignin, suberization, auxin catabolism, and response to environmental stressors</i> | Paynel, Florence, et al. "Temporal regulation of cell-wall pectin methylesterase and peroxidase isoforms in cadmium-treated flax hypocotyl." <i>Annals of botany</i> 104.7 (2009): 1363-1372.                                                                                                                                                                      |
| <i>Solyc04g064870.3</i> | 1.48 | protein early flowering 2-like                      | ELF5    | Involved in the regulation of flowering time in both long and short days                                                                                                                              | <i>Promoted flowering time</i>                                                                                                                                                                         | Noh, Yoo-Sun, Colleen M. Bizzell, Bosl Noh, Fritz M. Schomburg, and Richard M. Amasino. "EARLY FLOWERING 5 acts as a floral repressor in <i>Arabidopsis</i> ." <i>The Plant Journal</i> 38, no. 4 (2004): 664-672.                                                                                                                                                 |

| TomatoID                | DE   | NCBI Protein Name                                        | Gene ID | Uniprot Description                                                                                                                                                                                      | Putative Consequences for Infection                                                                                                        | Citation                                                                                                                                                                                                                                                          |
|-------------------------|------|----------------------------------------------------------|---------|----------------------------------------------------------------------------------------------------------------------------------------------------------------------------------------------------------|--------------------------------------------------------------------------------------------------------------------------------------------|-------------------------------------------------------------------------------------------------------------------------------------------------------------------------------------------------------------------------------------------------------------------|
| <i>Solyc08g006470.3</i> | 1.49 | cytoplasmic 60S subunit biogenesis factor REI1 homolog 1 | REIL1   | Involved in the dissociation and recycling of other late pre-60S factors before newly synthesized large ribosomal subunits enter translation; Required for leaf growth under cold temperature conditions | <i>Impaired growth under cold stress</i>                                                                                                   | Schmidt, Stefanie, Frederik Dethloff, Olga Beine-Golovchuk, and Joachim Kopka. "The REIL1 and REIL2 proteins of Arabidopsis thaliana are required for leaf growth in the cold." <i>Plant physiology</i> 163, no. 4 (2013): 1623-1639.                             |
| <i>Solyc08g078870.2</i> | 1.49 | 14 kDa proline-rich protein DC2.15-like                  | N/A     | Involved in the initiation of embryogenesis and the metabolic changes related to the removal of auxins                                                                                                   | <i>Promoted embryogenesis; Promoted auxin removal</i>                                                                                      | Aleith, F., and G. Richter. "Gene expression during induction of somatic embryogenesis in carrot cell suspensions." <i>Planta</i> 183, no. 1 (1991): 17-24.                                                                                                       |
| <i>Solyc09g097960.3</i> | 1.49 | aldo-keto reductases superfamily protein isoform X1      | N/A     | N/A                                                                                                                                                                                                      | N/A                                                                                                                                        | N/A                                                                                                                                                                                                                                                               |
| <i>Solyc09g082810.3</i> | 1.50 | N/A                                                      | N/A     | N/A                                                                                                                                                                                                      | N/A                                                                                                                                        | N/A                                                                                                                                                                                                                                                               |
| <i>Solyc01g006560.3</i> | 1.52 | lipoygenase, partial                                     | N/A     | N/A                                                                                                                                                                                                      | N/A                                                                                                                                        | N/A                                                                                                                                                                                                                                                               |
| <i>Solyc08g062220.3</i> | 1.53 | UDP-glycosyltransferase 74F2                             | UGT74F2 | Glycosyltransferase that glucosylates benzoic acid and derivatives                                                                                                                                       | N/A                                                                                                                                        | Quiel, Juan A., and Judith Bender. "Glucose Conjugation of Anthranilate by the Arabidopsis UGT74F2 Glycosyltransferase Is Required for Tryptophan Mutant Blue Fluorescence." <i>Journal of Biological Chemistry</i> 278, no. 8 (2003): 6275-6281.                 |
| <i>Solyc03g025450.3</i> | 1.55 | U-box domain-containing protein 32 isoform X2            | PUB32   | Functions as an E3 ubiquitin ligase                                                                                                                                                                      | <i>Promoted E3 ubiquitination</i>                                                                                                          | Benschop, Joris J., Shabaz Mohammed, Martina O'Flaherty, Albert JR Heck, Monique Slijper, and Frank LH Menke. "Quantitative phosphoproteomics of early elicitor signaling in Arabidopsis." <i>Molecular &amp; Cellular Proteomics</i> 6, no. 7 (2007): 1198-1214. |
| <i>Solyc10g008620.3</i> | 1.56 | N/A                                                      | N/A     | N/A                                                                                                                                                                                                      | N/A                                                                                                                                        | N/A                                                                                                                                                                                                                                                               |
| <i>Solyc11g066100.2</i> | 1.56 | heat shock cognate 70 kDa protein                        | HSP70-1 | Facilitate folding of de novo synthesized proteins, assist translocation of precursor proteins into organelles, and are responsible for degradation of damaged protein under stress conditions           | <i>Promoted folding of de novo synthesized proteins; Promoted protein transport; Promoted degradation of damaged proteins under stress</i> | Sung, Dong Yul, and Charles L. Guy. "Physiological and molecular assessment of altered expression of Hsc70-1 in Arabidopsis. Evidence for pleiotropic consequences." <i>Plant Physiology</i> 132, no. 2 (2003): 979-987.                                          |
| <i>Solyc09g089930.2</i> | 1.57 | ethylene responsive element binding protein              | EREBP1  | Involved in defense response; Involved in ethylene-activated signaling pathway                                                                                                                           | <i>Increased defense response; Increased ethylene-responsive signaling</i>                                                                 | Horvath, Diana M., Dorothy J. Huang, and Nam-Hai Chua. "Four classes of salicylate-induced tobacco genes." <i>Molecular plant-microbe interactions</i> 11.9 (1998): 895-905.                                                                                      |
| <i>Solyc04g080540.2</i> | 1.57 | uncharacterized protein LOC101245159                     | N/A     | N/A                                                                                                                                                                                                      | N/A                                                                                                                                        | N/A                                                                                                                                                                                                                                                               |

| TomatoID                | DE   | NCBI Protein Name                                          | Gene ID  | Uniprot Description                                                                         | Putative Consequences for Infection                                                                             | Citation                                                                                                                                                                                                                                                                                                                       |
|-------------------------|------|------------------------------------------------------------|----------|---------------------------------------------------------------------------------------------|-----------------------------------------------------------------------------------------------------------------|--------------------------------------------------------------------------------------------------------------------------------------------------------------------------------------------------------------------------------------------------------------------------------------------------------------------------------|
| <i>Solyc12g045020.2</i> | 1.57 | cytochrome P450 CYP736A12                                  | CYP734A1 | Cytochrome P450 involved in brassinosteroids inactivation and regulation of BRs homeostasis | <i>Promoted brassinosteroid inactivation; Promoted brassinosteroid homeostasis; Impaired growth/development</i> | Neff, Michael M., Serena M. Nguyen, Elizabeth J. Malancharuvil, Shozo Fujioka, Takahiro Noguchi, Hideharu Seto, Masayoshi Tsubuki et al. "BAS1: A gene regulating brassinosteroid levels and light responsiveness in Arabidopsis." Proceedings of the National Academy of Sciences 96, no. 26 (1999): 15316-15323.             |
| Solyc08g067630.3        | 1.58 | uncharacterized protein LOC101248124                       | N/A      | N/A                                                                                         | N/A                                                                                                             | N/A                                                                                                                                                                                                                                                                                                                            |
| Solyc01g080800.3        | 1.62 | uncharacterized protein LOC101249488                       | N/A      | N/A                                                                                         | N/A                                                                                                             | N/A                                                                                                                                                                                                                                                                                                                            |
| <i>Solyc12g005720.1</i> | 1.63 | cysteine-rich repeat secretory protein 38                  | CRRSP38  | Involved in response to abscisic acid                                                       | <i>Promoted response to abscisic acid signaling</i>                                                             | Huang, Kai-Chau, Wei-Chih Lin, and Wan-Hsing Cheng. "Salt hypersensitive mutant 9, a nucleolar APUM23 protein, is essential for salt sensitivity in association with the ABA signaling pathway in Arabidopsis." BMC plant biology 18, no. 1 (2018): 1-21.                                                                      |
| Solyc07g054760.1        | 1.64 | uncharacterized protein LOC101254813                       | N/A      | N/A                                                                                         | N/A                                                                                                             | N/A                                                                                                                                                                                                                                                                                                                            |
| <i>Solyc10g005080.3</i> | 1.65 | protein LHY isoform X2                                     | LHY      | Transcription factor involved in the circadian clock; Represses CCA1                        | <i>Promoted circadian rhythm; Promoted regulation of CCA1</i>                                                   | Mizoguchi, Tsuyoshi, et al. "LHY and CCA1 are partially redundant genes required to maintain circadian rhythms in Arabidopsis." Developmental cell 2.5 (2002): 629-641.                                                                                                                                                        |
| Solyc12g006380.2        | 1.68 | 2-oxoglutarate-dependent dioxygenase                       | AOP3     | Involved in glucosinolates biosynthesis                                                     | Promoted glucosinolate biosynthesis                                                                             | Kliebenstein, Daniel J., Virginia M. Lambrix, Michael Reichelt, Jonathan Gershenzon, and Thomas Mitchell-Olds. "Gene duplication in the diversification of secondary metabolism: tandem 2-oxoglutarate-dependent dioxygenases control glucosinolate biosynthesis in Arabidopsis." The Plant Cell 13, no. 3 (2001): 681-693.    |
| Solyc11g072470.2        | 1.68 | LOB domain-containing protein 1                            | LBD1     | N/A                                                                                         | N/A                                                                                                             | Hanada, Kousuke, Yuji Sawada, Takashi Kuromori, Romy Klausnitzer, Kazuki Saito, Tetsuro Toyoda, Kazuo Shinozaki, Wen-Hsiung Li, and Masami Yokota Hirai. "Functional compensation of primary and secondary metabolites by duplicate genes in Arabidopsis thaliana." Molecular biology and evolution 28, no. 1 (2011): 377-382. |
| <i>Solyc04g007000.1</i> | 1.69 | AP2/ERF and B3 domain-containing transcription factor RAV1 | RAV1     | Negative regulator of plant growth and development                                          | <i>Impaired growth and development</i>                                                                          | Feng, C.Z., Chen, Y., Wang, C., Kong, Y.H., Wu, W.H. and Chen, Y.F., 2014. Arabidopsis RAV 1 transcription factor, phosphorylated by SnRK2 kinases, regulates the expression of ABI 3, ABI 4, and ABI 5 during seed germination and early seedling development. The Plant Journal, 80(4), pp.654-668.                          |

| TomatoID                | DE   | NCBI Protein Name                                | Gene ID      | Uniprot Description                                    | Putative Consequences for Infection                | Citation                                                                                                                                                                                                                                                                                                                                               |
|-------------------------|------|--------------------------------------------------|--------------|--------------------------------------------------------|----------------------------------------------------|--------------------------------------------------------------------------------------------------------------------------------------------------------------------------------------------------------------------------------------------------------------------------------------------------------------------------------------------------------|
| Solyc09g011550.2        | 1.70 | probable glutathione S-transferase               | DHAR4        | Involved in ascorbate glutathione cycle                | Promoted ascorbate glutathione cycle               | Cheng, Chia-Yi, Vivek Krishnakumar, Agnes P. Chan, Françoise Thibaud-Nissen, Seth Schobel, and Christopher D. Town. "Araport11: a complete reannotation of the Arabidopsis thaliana reference genome." The Plant Journal 89, no. 4 (2017): 789-804.                                                                                                    |
| Solyc09g097760.3        | 1.70 | glycine-rich protein DC9.1                       | N/A          | N/A                                                    | N/A                                                | N/A                                                                                                                                                                                                                                                                                                                                                    |
| Solyc11g007770.2        | 1.70 | glycosyltransferase family protein 64 protein C5 | At1g80290    | Has glycosyltransferase activity                       | N/A                                                | Rawat, Arun, Georg J. Seifert, and Youping Deng. "Novel implementation of conditional co-regulation by graph theory to derive co-expressed genes from microarray data." In BMC bioinformatics, vol. 9, no. 9, pp. 1-9. BioMed Central, 2008.                                                                                                           |
| Solyc02g081180.2        | 1.73 | uncharacterized protein LOC104645789             | N/A          | N/A                                                    | N/A                                                | N/A                                                                                                                                                                                                                                                                                                                                                    |
| <i>Solyc02g068470.1</i> | 1.75 | VQ motif-containing protein 22                   | VQ22         | Functions as a positive regulator of plant growth      | <i>Promoted plant growth</i>                       | Cheng, Yuan, Yuan Zhou, Yan Yang, Ying-Jun Chi, Jie Zhou, Jian-Ye Chen, Fei Wang et al. "Structural and functional analysis of VQ motif-containing proteins in Arabidopsis as interacting proteins of WRKY transcription factors." Plant physiology 159, no. 2 (2012): 810-825.                                                                        |
| <i>Solyc07g006370.1</i> | 1.75 | cation/calcium exchanger 1-like                  | CCX1         | Involved in potassium and sodium ion transport         | <i>Promoted potassium and sodium ion transport</i> | Shigaki, T., I. Rees, L. Nakhleh, and K. D. Hirschi. "Identification of three distinct phylogenetic groups of CAX cation/proton antiporters." Journal of Molecular Evolution 63, no. 6 (2006): 815-825.                                                                                                                                                |
| Solyc12g099780.2        | 1.75 | N/A                                              | N/A          | N/A                                                    | N/A                                                | N/A                                                                                                                                                                                                                                                                                                                                                    |
| Solyc04g011480.3        | 1.77 | CASP-like protein PIMP1                          | At2g38480    | Metal-binding                                          | N/A                                                | Vergnolle, Chantal, Marie-Noëlle Vaultier, Ludvine Taconnat, Jean-Pierre Renou, Jean-Claude Kader, Alain Zachowski, and Eric Ruelland. "The cold-induced early activation of phospholipase C and D pathways determines the response of two distinct clusters of genes in Arabidopsis cell suspensions." Plant physiology 139, no. 3 (2005): 1217-1233. |
| Solyc09g008750.1        | 1.78 | uncharacterized protein LOC104649135             | N/A          | N/A                                                    | N/A                                                | N/A                                                                                                                                                                                                                                                                                                                                                    |
| Solyc07g052790.2        | 1.79 | TMV resistance protein N                         | N/A          | N/A                                                    | N/A                                                | N/A                                                                                                                                                                                                                                                                                                                                                    |
| Solyc10g051020.2        | 1.81 | cytochrome P450 CYP72A219                        | LOC104242999 | Heme binding; Iron ion binding; Monooxygenase activity | N/A                                                | Sierro, Nicolas, et al. "Reference genomes and transcriptomes of Nicotiana sylvestris and Nicotiana tomentosiformis." Genome biology 14.6 (2013): R60.                                                                                                                                                                                                 |
| Solyc10g051030.2        | 1.81 | uncharacterized protein LOC101245596 isoform X3  | N/A          | N/A                                                    | N/A                                                | N/A                                                                                                                                                                                                                                                                                                                                                    |

| TomatoID                | DE   | NCBI Protein Name                          | Gene ID | Uniprot Description                                                                                                                                                                  | Putative Consequences for Infection                                                                                             | Citation                                                                                                                                                                                                                                                                        |
|-------------------------|------|--------------------------------------------|---------|--------------------------------------------------------------------------------------------------------------------------------------------------------------------------------------|---------------------------------------------------------------------------------------------------------------------------------|---------------------------------------------------------------------------------------------------------------------------------------------------------------------------------------------------------------------------------------------------------------------------------|
| <i>Solyc07g065380.4</i> | 1.82 | zinc transporter-like precursor            | ZIP1    | Mediates copper, cadmium, and zinc uptake from the rhizosphere                                                                                                                       | <i>Promoted copper, cadmium, and zinc uptake from the rhizosphere</i>                                                           | Grotz, Natasha, Tama Fox, Erin Connolly, Walter Park, Mary Lou Guerinot, and David Eide. "Identification of a family of zinc transporter genes from Arabidopsis that respond to zinc deficiency." Proceedings of the National Academy of Sciences 95, no. 12 (1998): 7220-7224. |
| <i>Solyc03g114890.3</i> | 1.84 | COBRA-like protein 4 isoform X2            | COBL4   | Involved in cellulose microfibril organization; Involved in plant cell wall cellulose biosynthesis; Involved in secondary cell wall biogenesis                                       | <i>Promoted plant cell wall cellulose biosynthesis; Promoted secondary cell wall biogenesis</i>                                 | Brown, David M., Leo AH Zeef, Joanne Ellis, Royston Goodacre, and Simon R. Turner. "Identification of novel genes in Arabidopsis involved in secondary cell wall formation using expression profiling and reverse genetics." The Plant Cell 17, no. 8 (2005): 2281-2295.        |
| <i>Solyc04g040130.1</i> | 1.86 | delta(12)-fatty-acid desaturase FAD2-like  | FAD2    | Required for desaturation of fatty acids present in extraplasmidial membranes, including mitochondria; Required for salt tolerance during seed germination and early seedling growth | <i>Promoted salt tolerance during seed germination and early growth</i>                                                         | Okuley, John, Jonathan Lightner, Kenneth Feldmann, Narendra Yadav, Ellen Lark, and John Browse. "Arabidopsis FAD2 gene encodes the enzyme that is essential for polyunsaturated lipid synthesis." The Plant Cell 6, no. 1 (1994): 147-158.                                      |
| <i>Solyc07g054780.1</i> | 1.87 | uncharacterized protein LOC544070          | N/A     | N/A                                                                                                                                                                                  | N/A                                                                                                                             | N/A                                                                                                                                                                                                                                                                             |
| <i>Solyc05g010040.2</i> | 1.89 | N/A                                        | N/A     | N/A                                                                                                                                                                                  | N/A                                                                                                                             | N/A                                                                                                                                                                                                                                                                             |
| <i>Solyc10g076550.1</i> | 1.90 | wall-associated receptor kinase 2-like     | WAK2    | Serine/threonine-protein kinase that functions as a signaling receptor of extracellular matrix component; Involved in the control of cell expansion, morphogenesis, and development  | <i>Promoted signaling turnover; Promoted cell expansion, morphogenesis, and development</i>                                     | Wagner, Tanya A., and Bruce D. Kohorn. "Wall-associated kinases are expressed throughout plant development and are required for cell expansion." The Plant Cell 13, no. 2 (2001): 303-318.                                                                                      |
| <i>Solyc11g005840.2</i> | 1.91 | uncharacterized protein LOC101247180       | N/A     | N/A                                                                                                                                                                                  | N/A                                                                                                                             | N/A                                                                                                                                                                                                                                                                             |
| <i>Solyc06g084370.1</i> | 1.93 | uncharacterized protein LOC101254903       | N/A     | N/A                                                                                                                                                                                  | N/A                                                                                                                             | N/A                                                                                                                                                                                                                                                                             |
| <i>Solyc10g076537.1</i> | 2.11 | N/A                                        | N/A     | N/A                                                                                                                                                                                  | N/A                                                                                                                             | N/A                                                                                                                                                                                                                                                                             |
| <i>Solyc04g014400.3</i> | 2.11 | receptor-like protein 13 isoform X1        | RLP13   | Receptor protein                                                                                                                                                                     | N/A                                                                                                                             | Theologis, Athanasios, Joseph R. Ecker, Curtis J. Palm, Nancy A. Federspiel, Samir Kaul, Owen White, Jose Alonso et al. "Sequence and analysis of chromosome 1 of the plant Arabidopsis thaliana." Nature 408, no. 6814 (2000): 816-820.                                        |
| <i>Solyc05g053610.2</i> | 2.22 | pleiotropic drug resistance protein 1-like | PDR1    | Excretes secondary metabolites such as terpenes; Involved in both constitutive and jasmonic acid-dependent induced defense                                                           | <i>Increased secondary metabolite excretion; Promoted jasmonic-acid depended induced defense; Promoted constitutive defense</i> | Jasiński, Michał, Yvan Stukens, Hervé Degand, Bénédicte Purnelle, Jacqueline Marchand-Brynaert, and Marc Boutry. "A plant plasma membrane ATP binding cassette-type transporter is involved in antifungal terpenoid secretion." The Plant Cell 13, no. 5 (2001): 1095-1107.     |

| TomatoID                | DE   | NCBI Protein Name                                   | Gene ID   | Uniprot Description                                                                                                                                                                                   | Putative Consequences for Infection                                                                                                                                                                    | Citation                                                                                                                                                                                                                                                                                                                                                                                                                                                                         |
|-------------------------|------|-----------------------------------------------------|-----------|-------------------------------------------------------------------------------------------------------------------------------------------------------------------------------------------------------|--------------------------------------------------------------------------------------------------------------------------------------------------------------------------------------------------------|----------------------------------------------------------------------------------------------------------------------------------------------------------------------------------------------------------------------------------------------------------------------------------------------------------------------------------------------------------------------------------------------------------------------------------------------------------------------------------|
| <i>Solyc09g007520.3</i> | 2.27 | peroxidase 21                                       | PER21     | Involved in removal of H <sub>2</sub> O <sub>2</sub> , oxidation of toxic reductants, biosynthesis and degradation of lignin, suberization, auxin catabolism, and response to environmental stressors | <i>Increased removal of H<sub>2</sub>O<sub>2</sub>, oxidation of toxic reductants, biosynthesis and degradation of lignin, suberization, auxin catabolism, and response to environmental stressors</i> | Mosher, Rebecca A., Wendy E. Durrant, Dong Wang, Junqi Song, and Xinnian Dong. "A comprehensive structure–function analysis of Arabidopsis SN1 defines essential regions and transcriptional repressor activity." <i>The Plant Cell</i> 18, no. 7 (2006): 1750-1765.                                                                                                                                                                                                             |
| <i>Solyc12g100270.2</i> | 2.31 | protein ECERIFERUM 1                                | N/A       | Involved in the lipid biosynthetic process                                                                                                                                                            | Promoted lipid biosynthesis                                                                                                                                                                            | Garcia-Mas, Jordi, Andrej Benjak, Walter Sanseverino, Michael Bourgeois, Gisela Mir, Victor M. González, Elizabeth Hénaff et al. "The genome of melon ( <i>Cucumis melo</i> L.)." <i>Proceedings of the National Academy of Sciences</i> 109, no. 29 (2012): 11872-11877.                                                                                                                                                                                                        |
| <i>Solyc06g005813.1</i> | 2.34 | N/A                                                 | N/A       | N/A                                                                                                                                                                                                   | N/A                                                                                                                                                                                                    | N/A                                                                                                                                                                                                                                                                                                                                                                                                                                                                              |
| <i>Solyc09g008760.1</i> | 2.39 | probable cytochrome P450 556A1                      | cyp516A1  | Involved in xenobiotic metabolic process                                                                                                                                                              | <i>Promoted xenobiotic metabolism</i>                                                                                                                                                                  | Eichinger, L., J. A. Pachebat, G. Glöckner, M-A. Rajandream, R. Suckgang, M. Berriman, J. Song et al. "The genome of the social amoeba <i>Dictyostelium discoideum</i> ." <i>Nature</i> 435, no. 7038 (2005): 43-57.                                                                                                                                                                                                                                                             |
| <i>Solyc08g080585.1</i> | 2.41 | N/A                                                 | N/A       | N/A                                                                                                                                                                                                   | N/A                                                                                                                                                                                                    | N/A                                                                                                                                                                                                                                                                                                                                                                                                                                                                              |
| <i>Solyc03g095650.3</i> | 2.50 | MLO-like protein 5                                  | MLO5      | Involved in modulation of pathogen defense and leaf cell death                                                                                                                                        | <i>Promoted defense against pathogens; Promoted leaf programmed cell death</i>                                                                                                                         | Moriyama, Etsuko N., Pooja K. Strope, Stephen O. Opiyo, Zhongying Chen, and Alan M. Jones. "Mining the <i>Arabidopsis thaliana</i> genome for highly-divergent seven transmembrane receptors." <i>Genome biology</i> 7, no. 10 (2006): 1-9.                                                                                                                                                                                                                                      |
| <i>Solyc12g096570.1</i> | 2.52 | protein AUXIN-REGULATED GENE INVOLVED IN ORGAN SIZE | ARGOS     | Promotes cell proliferation-dependent organ growth; Takes part in the AXR1-dependent auxin signaling pathway that requires ANT during organogenesis                                                   | <i>Promoted organ growth; Promoted auxin signaling</i>                                                                                                                                                 | Hu, Yuxin, Qi Xie, and Nam-Hai Chua. "The <i>Arabidopsis</i> auxin-inducible gene ARGOS controls lateral organ size." <i>The Plant Cell</i> 15, no. 9 (2003): 1951-1961.                                                                                                                                                                                                                                                                                                         |
| <i>Solyc03g033840.3</i> | 2.57 | AAA-ATPase At3g50940-like                           | At3g50940 | Involved in lignin biosynthesis and response to salt stress                                                                                                                                           | <i>Promoted lignin biosynthesis; Promoted response to salt stress</i>                                                                                                                                  | van de Mortel, Judith E., Laia Almar Villanueva, Henk Schat, Jeroen Kwekkeboom, Sean Coughlan, Perry D. Moerland, Emiel Ver Loren van Themaat, Maarten Koornneef, and Mark GM Aarts. "Large expression differences in genes for iron and zinc homeostasis, stress response, and lignin biosynthesis distinguish roots of <i>Arabidopsis thaliana</i> and the related metal hyperaccumulator <i>Thlaspi caerulescens</i> ." <i>Plant physiology</i> 142, no. 3 (2006): 1127-1147. |
| <i>Solyc08g068870.3</i> | 2.63 | aspartate protease family protein precursor         | APF1      | Aspartyl protease; Necessary for fungal resistance                                                                                                                                                    | <i>Increased fungal resistance</i>                                                                                                                                                                     | Li, Yurong, Mehdi Kabbage, Wende Liu, and Martin B. Dickman. "Aspartyl protease-mediated cleavage of BAG6 is necessary for autophagy and fungal resistance in plants." <i>The Plant Cell</i> 28, no. 1 (2016): 233-247.                                                                                                                                                                                                                                                          |

| TomatoID                | DE   | NCBI Protein Name                               | Gene ID | Uniprot Description                                                                                                                                                                  | Putative Consequences for Infection                                                        | Citation                                                                                                                                                                                                                                                                                                                  |
|-------------------------|------|-------------------------------------------------|---------|--------------------------------------------------------------------------------------------------------------------------------------------------------------------------------------|--------------------------------------------------------------------------------------------|---------------------------------------------------------------------------------------------------------------------------------------------------------------------------------------------------------------------------------------------------------------------------------------------------------------------------|
| <i>Solyc12g100250.2</i> | 2.78 | delta(12)-fatty-acid desaturase FAD2 isoform X1 | FAD2    | Required for desaturation of fatty acids present in extraplastidial membranes, including mitochondria; Required for salt tolerance during seed germination and early seedling growth | <i>Promoted salt tolerance during seed germination and early growth</i>                    | Okuley, John, Jonathan Lightner, Kenneth Feldmann, Narendra Yadav, Ellen Lark, and John Browse. "Arabidopsis FAD2 gene encodes the enzyme that is essential for polyunsaturated lipid synthesis." <i>The Plant Cell</i> 6, no. 1 (1994): 147-158.                                                                         |
| <i>Solyc12g100240.1</i> | 2.78 | delta(12)-fatty-acid desaturase FAD2-like       | FAD2    | Required for desaturation of fatty acids present in extraplastidial membranes, including mitochondria; Required for salt tolerance during seed germination and early seedling growth | <i>Promoted salt tolerance during seed germination and early growth</i>                    | Okuley, John, Jonathan Lightner, Kenneth Feldmann, Narendra Yadav, Ellen Lark, and John Browse. "Arabidopsis FAD2 gene encodes the enzyme that is essential for polyunsaturated lipid synthesis." <i>The Plant Cell</i> 6, no. 1 (1994): 147-158.                                                                         |
| <i>Solyc04g014770.1</i> | 3.12 | N/A                                             | N/A     | N/A                                                                                                                                                                                  | N/A                                                                                        | N/A                                                                                                                                                                                                                                                                                                                       |
| <i>Solyc07g056510.3</i> | 3.12 | probable glutathione S-transferase parA         | DHAR2   | As a soluble protein, exhibits glutathione-dependent thiol transferase and dehydroascorbate reductase activities; Key component of the ascorbate recycling system                    | Promoted ascorbate recycling                                                               | Dixon, David P., Benjamin G. Davis, and Robert Edwards. "Functional divergence in the glutathione transferase superfamily in plants: identification of two classes with putative functions in redox homeostasis in <i>Arabidopsis thaliana</i> ." <i>Journal of Biological Chemistry</i> 277, no. 34 (2002): 30859-30869. |
| <i>Solyc12g100260.1</i> | 3.19 | delta(12)-fatty-acid desaturase FAD2-like       | FAD2    | Required for desaturation of fatty acids present in extraplastidial membranes, including mitochondria; Required for salt tolerance during seed germination and early seedling growth | <i>Promoted salt tolerance during seed germination and early growth</i>                    | Okuley, John, Jonathan Lightner, Kenneth Feldmann, Narendra Yadav, Ellen Lark, and John Browse. "Arabidopsis FAD2 gene encodes the enzyme that is essential for polyunsaturated lipid synthesis." <i>The Plant Cell</i> 6, no. 1 (1994): 147-158.                                                                         |
| <i>Solyc05g015850.3</i> | 3.81 | WRKY DNA binding protein 1                      | WRKY1   | Transcription factor                                                                                                                                                                 | N/A                                                                                        | de Pater, Sylvia, Valentina Greco, Khanh Pham, Johan Memelink, and Jan Kijne. "Characterization of a zinc-dependent transcriptional activator from <i>Arabidopsis</i> ." <i>Nucleic Acids Research</i> 24, no. 23 (1996): 4624-4631.                                                                                      |
| <i>Solyc09g091000.3</i> | 4.16 | pathogenesis-related protein STH-2              | STH-2   | Regulates protein serein/threonine phosphate activity; Involved in abscisic acid-activated signaling pathway; Involved in defense response to biotic stimulus                        | <i>Promoted abscisic acid signaling;</i><br><i>Promoted defense against biotic stimuli</i> | Matton, Daniel P., Gary Prescott, Charles Bertrand, Anne Camirand, and Normand Brisson. "Identification of cis-acting elements involved in the regulation of the pathogenesis-related gene STH-2 in potato." <i>Plant molecular biology</i> 22, no. 2 (1993): 279-291.                                                    |
