# Supplementary material for: Effects of ‘Candidatus Liberibacter solanacearum’ haplotypes A and B on tomato gene expression and geotropism
Source: PubMed Central journal article supplement (PMC8966271; doi:10.1186/s12870-022-03505-z), 2022-03-30
Supplement: 12870_2022_3505_MOESM11_ESM.pdf [file 12870_2022_3505_MOESM11_ESM.pdf]

| KEGG Pathway | Pathway Name                          | KEGG Gene ID  | Gene Name                                                                      |
|--------------|---------------------------------------|---------------|--------------------------------------------------------------------------------|
| ath01100     | Metabolic pathways                    | ath:AT1G05010 | EFE; ethylene-forming enzyme                                                   |
| ath01100     | Metabolic pathways                    | ath:AT1G08200 | AXS2; UDP-D-apiose/UDP-D-xylose synthase 2                                     |
| ath01100     | Metabolic pathways                    | ath:AT1G23820 | SPDS1; spermidine synthase                                                     |
| ath01100     | Metabolic pathways                    | ath:AT1G26570 | UGD1; UDP-glucose dehydrogenase 1                                              |
| ath01100     | Metabolic pathways                    | ath:AT1G30620 | MUR4; NAD(P)-binding Rossmann-fold superfamily protein                         |
| ath01100     | Metabolic pathways                    | ath:AT1G60810 | ACL2; ATP-citrate lyase A-2                                                    |
| ath01100     | Metabolic pathways                    | ath:AT1G67750 | Pectate lyase family protein                                                   |
| ath01100     | Metabolic pathways                    | ath:AT1G68530 | KCS6; 3-ketoacyl-CoA synthase 6                                                |
| ath01100     | Metabolic pathways                    | ath:AT1G71695 | Peroxidase superfamily protein                                                 |
| ath01100     | Metabolic pathways                    | ath:AT1G75270 | DHAR2; dehydroascorbate reductase 2                                            |
| ath01100     | Metabolic pathways                    | ath:AT1G76490 | HMG1; hydroxy methylglutaryl CoA reductase 1                                   |
| ath01100     | Metabolic pathways                    | ath:AT2G21330 | FBA1; fructose-bisphosphate aldolase 1                                         |
| ath01100     | Metabolic pathways                    | ath:AT2G24200 | LAP1; Cytosol aminopeptidase family protein                                    |
| ath01100     | Metabolic pathways                    | ath:AT2G37130 | Peroxidase superfamily protein                                                 |
| ath01100     | Metabolic pathways                    | ath:AT2G43590 | Chitinase family protein                                                       |
| ath01100     | Metabolic pathways                    | ath:AT3G06350 | MEE32; dehydroquininate dehydratase, putative / shikimate dehydrogenase        |
| ath01100     | Metabolic pathways                    | ath:AT3G12120 | FAD2; fatty acid desaturase 2                                                  |
| ath01100     | Metabolic pathways                    | ath:AT3G13560 | O-Glycosyl hydrolases family 17 protein                                        |
| ath01100     | Metabolic pathways                    | ath:AT3G25400 | dCTP pyrophosphatase-like protein                                              |
| ath01100     | Metabolic pathways                    | ath:AT3G45770 | Polyketide synthase, enoylreductase family protein                             |
| ath01100     | Metabolic pathways                    | ath:AT4G08870 | ARGAH2; Arginase/deacetylase superfamily protein                               |
| ath01100     | Metabolic pathways                    | ath:AT4G26220 | S-adenosyl-L-methionine-dependent methyltransferases superfamily protein       |
| ath01100     | Metabolic pathways                    | ath:AT4G30920 | LAP2; Cytosol aminopeptidase family protein                                    |
| ath01100     | Metabolic pathways                    | ath:AT4G33150 | lysine-ketoglutarate reductase/saccharopine dehydrogenase bifunctional         |
| ath01100     | Metabolic pathways                    | ath:AT4G35160 | O-methyltransferase family protein                                             |
| ath01100     | Metabolic pathways                    | ath:AT4G37970 | CAD6; cinnamyl alcohol dehydrogenase 6                                         |
| ath01100     | Metabolic pathways                    | ath:AT4G39010 | GH9B18; glycosyl hydrolase 9B18                                                |
| ath01100     | Metabolic pathways                    | ath:AT5G03300 | ADK2; adenosine kinase 2                                                       |
| ath01100     | Metabolic pathways                    | ath:AT5G06060 | NAD(P)-binding Rossmann-fold superfamily protein                               |
| ath01100     | Metabolic pathways                    | ath:AT5G20830 | SUS1; sucrose synthase 1                                                       |
| ath01100     | Metabolic pathways                    | ath:AT5G21100 | Plant L-ascorbate oxidase                                                      |
| ath01100     | Metabolic pathways                    | ath:AT5G37600 | GSR_1; hypothetical protein                                                    |
| ath01100     | Metabolic pathways                    | ath:AT5G40150 | Peroxidase superfamily protein                                                 |
| ath01100     | Metabolic pathways                    | ath:AT5G60340 | AAK6; P-loop containing nucleoside triphosphate hydrolases superfamily protein |
| ath01100     | Metabolic pathways                    | ath:ArthCp002 | psbA; photosystem II protein D1                                                |
| ath01100     | Metabolic pathways                    | ath:ArthCp007 | atpA; ATP synthase CF1 alpha subunit                                           |
| ath01100     | Metabolic pathways                    | ath:ArthCp018 | psbC; photosystem II 44 kDa protein                                            |
| ath01100     | Metabolic pathways                    | ath:ArthCp022 | psaA; photosystem I P700 chlorophyll a apoprotein A1                           |
| ath01100     | Metabolic pathways                    | ath:ArthCp053 | petB; cytochrome b6                                                            |
| ath01110     | Biosynthesis of secondary metabolites | ath:AT1G05010 | EFE; ethylene-forming enzyme                                                   |
| ath01110     | Biosynthesis of secondary metabolites | ath:AT1G19640 | JMT; jasmonic acid carboxyl methyltransferase                                  |
| ath01110     | Biosynthesis of secondary metabolites | ath:AT1G60810 | ACL2; ATP-citrate lyase A-2                                                    |
| ath01110     | Biosynthesis of secondary metabolites | ath:AT1G68530 | KCS6; 3-ketoacyl-CoA synthase 6                                                |
| ath01110     | Biosynthesis of secondary metabolites | ath:AT1G71695 | Peroxidase superfamily protein                                                 |
| ath01110     | Biosynthesis of secondary metabolites | ath:AT1G76490 | HMG1; hydroxy methylglutaryl CoA reductase 1                                   |
| ath01110     | Biosynthesis of secondary metabolites | ath:AT2G19500 | CKX2; cytokinin oxidase 2                                                      |
| ath01110     | Biosynthesis of secondary metabolites | ath:AT2G21330 | FBA1; fructose-bisphosphate aldolase 1                                         |
| ath01110     | Biosynthesis of secondary metabolites | ath:AT2G24190 | SDR2; NAD(P)-binding Rossmann-fold superfamily protein                         |
| ath01110     | Biosynthesis of secondary metabolites | ath:AT2G26710 | BAS1; Cytochrome P450 superfamily protein                                      |
| ath01110     | Biosynthesis of secondary metabolites | ath:AT2G36750 | UGT73C1; UDP-glucosyl transferase 73C1                                         |
| ath01110     | Biosynthesis of secondary metabolites | ath:AT2G37130 | Peroxidase superfamily protein                                                 |
| ath01110     | Biosynthesis of secondary metabolites | ath:AT3G06350 | MEE32; dehydroquininate dehydratase, putative / shikimate dehydrogenase        |
| ath01110     | Biosynthesis of secondary metabolites | ath:AT4G08870 | ARGAH2; Arginase/deacetylase superfamily protein                               |
| ath01110     | Biosynthesis of secondary metabolites | ath:AT4G26220 | S-adenosyl-L-methionine-dependent methyltransferases superfamily protein       |
| ath01110     | Biosynthesis of secondary metabolites | ath:AT4G33150 | lysine-ketoglutarate reductase/saccharopine dehydrogenase bifunctional enzyme  |
| ath01110     | Biosynthesis of secondary metabolites | ath:AT4G35160 | O-methyltransferase family protein                                             |

| KEGG Pathway | Pathway Name                                | KEGG Gene ID  | Gene Name                                                                      |
|--------------|---------------------------------------------|---------------|--------------------------------------------------------------------------------|
| ath01110     | Biosynthesis of secondary metabolites       | ath:AT4G37970 | CAD6; cinnamyl alcohol dehydrogenase 6                                         |
| ath01110     | Biosynthesis of secondary metabolites       | ath:AT5G06060 | NAD(P)-binding Rossmann-fold superfamily protein                               |
| ath01110     | Biosynthesis of secondary metabolites       | ath:AT5G20830 | SUS1; sucrose synthase 1                                                       |
| ath01110     | Biosynthesis of secondary metabolites       | ath:AT5G40150 | Peroxidase superfamily protein                                                 |
| ath01110     | Biosynthesis of secondary metabolites       | ath:AT5G60340 | AAK6; P-loop containing nucleoside triphosphate hydrolases superfamily protein |
| ath04075     | Plant hormone signal transduction           | ath:AT1G74890 | ARR15; response regulator 15                                                   |
| ath04075     | Plant hormone signal transduction           | ath:AT2G25490 | EBF1; EIN3-binding F box protein 1                                             |
| ath04075     | Plant hormone signal transduction           | ath:AT3G11410 | PP2CA; protein phosphatase 2CA                                                 |
| ath04075     | Plant hormone signal transduction           | ath:AT3G63010 | GID1B; alpha/beta-Hydrolases superfamily protein                               |
| ath04075     | Plant hormone signal transduction           | ath:AT5G18030 | SAUR-like auxin-responsive protein family                                      |
| ath00195     | Photosynthesis                              | ath:ArthCp002 | psbA; photosystem II protein D1                                                |
| ath00195     | Photosynthesis                              | ath:ArthCp007 | atpA; ATP synthase CF1 alpha subunit                                           |
| ath00195     | Photosynthesis                              | ath:ArthCp018 | psbC; photosystem II 44 kDa protein                                            |
| ath00195     | Photosynthesis                              | ath:ArthCp022 | psaA; photosystem I P700 chlorophyll a apoprotein A1                           |
| ath00195     | Photosynthesis                              | ath:ArthCp053 | petB; cytochrome b6                                                            |
| ath04712     | Circadian rhythm                            | ath:AT1G01060 | LHY; Homeodomain-like superfamily protein                                      |
| ath04712     | Circadian rhythm                            | ath:AT1G22770 | Gl; gigantea protein (Gl)                                                      |
| ath04712     | Circadian rhythm                            | ath:AT1G68050 | FKF1; flavin-binding, kelch repeat, f box 1                                    |
| ath04712     | Circadian rhythm                            | ath:AT5G24470 | PRR5; two-component response regulator-like protein                            |
| ath04712     | Circadian rhythm                            | ath:AT5G62430 | CDF1; cycling DOF factor 1                                                     |
| ath00940     | Phenylpropanoid biosynthesis                | ath:AT1G71695 | Peroxidase superfamily protein                                                 |
| ath00940     | Phenylpropanoid biosynthesis                | ath:AT2G37130 | Peroxidase superfamily protein                                                 |
| ath00940     | Phenylpropanoid biosynthesis                | ath:AT4G26220 | S-adenosyl-L-methionine-dependent methyltransferases superfamily protein       |
| ath00940     | Phenylpropanoid biosynthesis                | ath:AT4G37970 | CAD6; cinnamyl alcohol dehydrogenase 6                                         |
| ath00940     | Phenylpropanoid biosynthesis                | ath:AT5G40150 | Peroxidase superfamily protein                                                 |
| ath00520     | Amino sugar and nucleotide sugar metabolism | ath:AT1G08200 | AXS2; UDP-D-apiose/UDP-D-xylose synthase 2                                     |
| ath00520     | Amino sugar and nucleotide sugar metabolism | ath:AT1G26570 | UGD1; UDP-glucose dehydrogenase 1                                              |
| ath00520     | Amino sugar and nucleotide sugar metabolism | ath:AT1G30620 | MUR4; NAD(P)-binding Rossmann-fold superfamily protein                         |
| ath00520     | Amino sugar and nucleotide sugar metabolism | ath:AT2G43590 | Chitinase family protein                                                       |
| ath00480     | Glutathione metabolism                      | ath:AT1G23820 | SPDS1; spermidine synthase                                                     |
| ath00480     | Glutathione metabolism                      | ath:AT1G75270 | DHAR2; dehydroascorbate reductase 2                                            |
| ath00480     | Glutathione metabolism                      | ath:AT2G24200 | LAP1; Cytosol aminopeptidase family protein                                    |
| ath00480     | Glutathione metabolism                      | ath:AT4G30920 | LAP2; Cytosol aminopeptidase family protein                                    |
| ath01230     | Biosynthesis of amino acids                 | ath:AT2G21330 | FBA1; fructose-bisphosphate aldolase 1                                         |
| ath01230     | Biosynthesis of amino acids                 | ath:AT3G06350 | MEE32; dehydroquininate dehydratase, putative / shikimate dehydrogenase        |
| ath01230     | Biosynthesis of amino acids                 | ath:AT4G08870 | ARGAH2; Arginase/deacetylase superfamily protein                               |
| ath01230     | Biosynthesis of amino acids                 | ath:AT5G37600 | GSR_1; hypothetical protein                                                    |
| ath04141     | Protein processing in endoplasmic reticulum | ath:AT1G07400 | HSP20-like chaperones superfamily protein                                      |
| ath04141     | Protein processing in endoplasmic reticulum | ath:AT1G75950 | SKP1; S phase kinase-associated protein 1                                      |
| ath04141     | Protein processing in endoplasmic reticulum | ath:AT5G02490 | Hsp70-2; Heat shock protein 70 (Hsp 70) family protein                         |
| ath04141     | Protein processing in endoplasmic reticulum | ath:AT5G02500 | HSC70-1; heat shock cognate protein 70-1                                       |
| ath04145     | Phagosome                                   | ath:AT1G20010 | TUB5; tubulin beta-5 chain                                                     |
| ath04145     | Phagosome                                   | ath:AT1G64740 | TUA1; alpha-1 tubulin                                                          |
| ath04145     | Phagosome                                   | ath:AT1G75780 | TUB1; tubulin beta-1 chain                                                     |
| ath04144     | Endocytosis                                 | ath:AT1G01200 | RABA3; RAB GTPase homolog A3                                                   |
| ath04144     | Endocytosis                                 | ath:AT5G02490 | Hsp70-2; Heat shock protein 70 (Hsp 70) family protein                         |
| ath04144     | Endocytosis                                 | ath:AT5G02500 | HSC70-1; heat shock cognate protein 70-1                                       |
| ath00500     | Starch and sucrose metabolism               | ath:AT3G13560 | O-Glycosyl hydrolases family 17 protein                                        |
| ath00500     | Starch and sucrose metabolism               | ath:AT4G39010 | GH9B18; glycosyl hydrolase 9B18                                                |
| ath00500     | Starch and sucrose metabolism               | ath:AT5G20830 | SUS1; sucrose synthase 1                                                       |
| ath00053     | Ascorbate and aldarate metabolism           | ath:AT1G26570 | UGD1; UDP-glucose dehydrogenase 1                                              |

| KEGG Pathway | Pathway Name                                           | KEGG Gene ID  | Gene Name                                                                       |
|--------------|--------------------------------------------------------|---------------|---------------------------------------------------------------------------------|
| ath00053     | Ascorbate and aldarate metabolism                      | ath:AT1G75270 | DHAR2; dehydroascorbate reductase 2                                             |
| ath00053     | Ascorbate and aldarate metabolism                      | ath:AT5G21100 | Plant L-ascorbate oxidase                                                       |
| ath04016     | MAPK signaling pathway                                 | ath:AT2G25490 | EBF1; EIN3-binding F box protein 1                                              |
| ath04016     | MAPK signaling pathway                                 | ath:AT2G32510 | MAPKKK17; mitogen-activated protein kinase kinase kinase 17                     |
| ath04016     | MAPK signaling pathway                                 | ath:AT3G11410 | PP2CA; protein phosphatase 2CA                                                  |
| ath01250     | Biosynthesis of nucleotide sugars                      | ath:AT1G08200 | AXS2; UDP-D-apiose/UDP-D-xylose synthase 2                                      |
| ath01250     | Biosynthesis of nucleotide sugars                      | ath:AT1G26570 | UGD1; UDP-glucose dehydrogenase 1                                               |
| ath01250     | Biosynthesis of nucleotide sugars                      | ath:AT1G30620 | MUR4; NAD(P)-binding Rossmann-fold superfamily protein                          |
| ath04626     | Plant-pathogen interaction                             | ath:AT1G68530 | KCS6; 3-ketoacyl-CoA synthase 6                                                 |
| ath04626     | Plant-pathogen interaction                             | ath:AT2G04880 | ZAP1; zinc-dependent activator protein-1                                        |
| ath00330     | Arginine and proline metabolism                        | ath:AT1G23820 | SPDS1; spermidine synthase                                                      |
| ath00330     | Arginine and proline metabolism                        | ath:AT4G08870 | ARGAH2; Arginase/deacetylase superfamily protein                                |
| ath00062     | Fatty acid elongation                                  | ath:AT1G68530 | KCS6; 3-ketoacyl-CoA synthase 6                                                 |
| ath00062     | Fatty acid elongation                                  | ath:AT3G45770 | Polyketide synthase, enoylreductase family protein                              |
| ath01240     | Biosynthesis of cofactors                              | ath:AT1G26570 | UGD1; UDP-glucose dehydrogenase 1                                               |
| ath01240     | Biosynthesis of cofactors                              | ath:AT5G60340 | AAK6; P-loop containing nucleoside triphosphate hydrolases superfamily protein  |
| ath01212     | Fatty acid metabolism                                  | ath:AT3G12120 | FAD2; fatty acid desaturase 2                                                   |
| ath01212     | Fatty acid metabolism                                  | ath:AT3G45770 | Polyketide synthase, enoylreductase family protein                              |
| ath00908     | Zeatin biosynthesis                                    | ath:AT2G19500 | CKX2; cytokinin oxidase 2                                                       |
| ath00908     | Zeatin biosynthesis                                    | ath:AT2G36750 | UGT73C1; UDP-glucosyl transferase 73C1                                          |
| ath00270     | Cysteine and methionine metabolism                     | ath:AT1G05010 | EFE; ethylene-forming enzyme                                                    |
| ath00270     | Cysteine and methionine metabolism                     | ath:AT1G23820 | SPDS1; spermidine synthase                                                      |
| ath03040     | Spliceosome                                            | ath:AT5G02490 | Hsp70-2; Heat shock protein 70 (Hsp 70) family pr                               |
| ath03040     | Spliceosome                                            | ath:AT5G02500 | HSC70-1; heat shock cognate protein 70-1                                        |
| ath00220     | Arginine biosynthesis                                  | ath:AT4G08870 | ARGAH2; Arginase/deacetylase superfamily protein                                |
| ath00220     | Arginine biosynthesis                                  | ath:AT5G37600 | GSR_1; hypothetical protein                                                     |
| ath00040     | Pentose and glucuronate interconversions               | ath:AT1G26570 | UGD1; UDP-glucose dehydrogenase 1                                               |
| ath00040     | Pentose and glucuronate interconversions               | ath:AT1G67750 | Pectate lyase family protein                                                    |
| ath00230     | Purine metabolism                                      | ath:AT5G03300 | ADK2; adenosine kinase 2                                                        |
| ath00230     | Purine metabolism                                      | ath:AT5G60340 | AAK6; P-loop containing nucleoside triphosphate hydrolases super family protein |
| ath00945     | Stilbenoid, diarylheptanoid and gingerol biosynthesis  | ath:AT4G26220 | S-adenosyl-L-methionine-dependent methyltransferases superfamily protein        |
| ath00592     | alpha-Linolenic acid metabolism                        | ath:AT1G19640 | JMT; jasmonic acid carboxyl methyltransferase                                   |
| ath00941     | Flavonoid biosynthesis                                 | ath:AT4G26220 | S-adenosyl-L-methionine-dependent methyltransferases superfamily protein        |
| ath01200     | Carbon metabolism                                      | ath:AT2G21330 | FBA1; fructose-bisphosphate aldolase 1                                          |
| ath00902     | Monoterpenoid biosynthesis                             | ath:AT2G24190 | SDR2; NAD(P)-binding Rossmann-fold superfamily protein                          |
| ath00960     | Tropane, piperidine and pyridine alkaloid biosynthesis | ath:AT5G06060 | NAD(P)-binding Rossmann-fold superfamily protein                                |
| ath00905     | Brassinosteroid biosynthesis                           | ath:AT2G26710 | BAS1; Cytochrome P450 superfamily protein                                       |
| ath04146     | Peroxisome                                             | ath:AT2G28190 | CSD2; copper/zinc superoxide dismutase 2                                        |
| ath03060     | Protein export                                         | ath:AT1G48160 | signal recognition particle 19 kDa protein, putative / SRP19                    |
| ath00310     | Lysine degradation                                     | ath:AT4G33150 | lysine-ketoglutarate reductase/saccharopine dehydrogenase bifunctional enzyme   |
| ath00190     | Oxidative phosphorylation                              | ath:ArthCp007 | atpA; ATP synthase CF1 alpha subunit                                            |
| ath00051     | Fructose and mannose metabolism                        | ath:AT2G21330 | FBA1; fructose-bisphosphate aldolase 1                                          |
| ath00400     | Phenylalanine, tyrosine and tryptophan biosynthesis    | ath:AT3G06350 | MEE32; dehydroquininate dehydratase, putative / shikimate dehydrogenase         |
| ath00020     | Citrate cycle (TCA cycle)                              | ath:AT1G60810 | ACLA-2; ATP-citrate lyase A-2                                                   |
| ath00010     | Glycolysis / Gluconeogenesis                           | ath:AT2G21330 | FBA1; fructose-bisphosphate aldolase 1                                          |
| ath00380     | Tryptophan metabolism                                  | ath:AT4G35160 | O-methyltransferase family protein                                              |
| ath00030     | Pentose phosphate pathway                              | ath:AT2G21330 | FBA1; fructose-bisphosphate aldolase 1                                          |
| ath01040     | Biosynthesis of unsaturated fatty acids                | ath:AT3G12120 | FAD2; fatty acid desaturase 2                                                   |
| ath00630     | Glyoxylate and dicarboxylate metabolism                | ath:AT5G37600 | GSR_1; hypothetical protein                                                     |
| ath03015     | mRNA surveillance pathway                              | ath:AT3G26618 | ERF1-3; eukaryotic release factor 1-3                                           |
| ath00900     | Terpenoid backbone biosynthesis                        | ath:AT1G76490 | HMG1; hydroxy methylglutaryl CoA reductase 1                                    |

| KEGG Pathway | Pathway Name                                        | KEGG Gene ID  | Gene Name                                                                      |
|--------------|-----------------------------------------------------|---------------|--------------------------------------------------------------------------------|
| ath00250     | Alanine, aspartate and glutamate metabolism         | ath:AT5G37600 | GSR_1; hypothetical protein                                                    |
| ath03008     | Ribosome biogenesis in eukaryotes                   | ath:AT5G60340 | AAK6; P-loop containing nucleoside triphosphate hydrolases superfamily protein |
| ath00910     | Nitrogen metabolism                                 | ath:AT5G37600 | GSR_1; hypothetical protein                                                    |
| ath00240     | Pyrimidine metabolism                               | ath:AT3G25400 | dCTP pyrophosphatase-like protein                                              |
| ath00999     | Biosynthesis of various plant secondary metabolites | ath:AT3G06350 | MEE32; dehydroquininate dehydratase, putative / shikimate dehydrogenase        |
| ath04120     | Ubiquitin mediated proteolysis                      | ath:AT1G75950 | SKP1; S phase kinase-associated protein 1                                      |
| ath00061     | Fatty acid biosynthesis                             | ath:AT3G45770 | Polyketide synthase, enoylreductase family protein                             |
| ath00710     | Carbon fixation in photosynthetic organisms         | ath:AT2G21330 | FBA1; fructose-bisphosphate aldolase 1                                         |
