# Supplementary material for: Effects of ‘Candidatus Liberibacter solanacearum’ haplotypes A and B on tomato gene expression and geotropism
Source: PubMed Central journal article supplement (PMC8966271; doi:10.1186/s12870-022-03505-z), 2022-03-30
Supplement: 12870_2022_3505_MOESM12_ESM.pdf [file 12870_2022_3505_MOESM12_ESM.pdf]

| TomatoID                | DE in LsoB | NCBI Protein Name                                             | Gene ID | Uniprot Description                                                                                                                                                 | Putative Consequences for Infection                                                                      | Citation                                                                                                                                                                                                                                                                                                                                                                         |
|-------------------------|------------|---------------------------------------------------------------|---------|---------------------------------------------------------------------------------------------------------------------------------------------------------------------|----------------------------------------------------------------------------------------------------------|----------------------------------------------------------------------------------------------------------------------------------------------------------------------------------------------------------------------------------------------------------------------------------------------------------------------------------------------------------------------------------|
| <i>Solyc06g009190.3</i> | 2.60       | pectinesterase                                                | PME1    | Acts in the modification of cell walls via demethylesterification of cell wall pectin; Acts as negative regulators of genes involved in salt stress response        | <i>Impaired cell wall modification; Impaired response to salt stress</i>                                 | Creighton, Maria T., Anna Kolton, Amr RA Kataya, Jodi Maple-Grødem, Irina O. Averkina, Behzad Heidari, and Cathrine Lillo. "Methylation of protein phosphatase 2A—Influence of regulators and environmental stress factors." <i>Plant, cell &amp; environment</i> 40, no. 10 (2017): 2347-2358.                                                                                  |
| <i>Solyc10g079350.2</i> | 2.52       | zeatin O-glucosyltransferase-like                             | ZOG1    | Regulates cytokinin activity and storage; Impacts seed growth                                                                                                       | <i>Impaired cellular division and plant growth in roots and shoots; Impaired reproductive investment</i> | Hou, Bingkai, et al. "N-glucosylation of cytokinins by glycosyltransferases of <i>Arabidopsis thaliana</i> ." <i>Journal of Biological Chemistry</i> 279.46 (2004): 47822-47832.                                                                                                                                                                                                 |
| <i>Solyc03g098300.1</i> | 2.22       | ornithine decarboxylase-like                                  | ODC     | Catalyzes the first and rate-limiting step of polyamine biosynthesis; Polyamines are essential for cell proliferation                                               | <i>Impaired polyamine biosynthesis; Impaired cell proliferation</i>                                      | Alabadi, David, and Juan Carbonell. "Expression of ornithine decarboxylase is transiently increased by pollination, 2, 4-dichlorophenoxyacetic acid, and gibberellic acid in tomato ovaries." <i>Plant physiology</i> 118, no. 1 (1998): 323-328.                                                                                                                                |
| <i>Solyc05g007830.3</i> | 2.19       | expansin-A1                                                   | EXPA1   | Causes loosening and extension of plant cell walls by disrupting non-covalent bonding between cellulose microfibrils and matrix glucans                             | <i>Impaired plant cell wall extension</i>                                                                | Zhang, Xiu-Qing, Peng-Cheng Wei, Yan-Mei Xiong, Yi Yang, Jia Chen, and Xue-Chen Wang. "Overexpression of the <i>Arabidopsis</i> $\alpha$ -expansin gene AtEXPA1 accelerates stomatal opening by decreasing the volumetric elastic modulus." <i>Plant cell reports</i> 30, no. 1 (2011): 27-36.                                                                                   |
| <i>Solyc08g067530.1</i> | 2.16       | non-specific lipid-transfer protein 1-like                    | LTP1    | Plays a role in wax or cutin deposition in the cell walls of expanding epidermal cells and certain secretory tissues                                                | <i>Impaired wax/cutin deposition; Impaired plant cell wall expansion</i>                                 | Skriver, Karen, Robert Leah, Frieder Müller-Urli, Finn-Lok Olsen, and John Mundy. "Structure and expression of the barley lipid transfer protein gene <i>Ltp1</i> ." <i>Plant molecular biology</i> 18, no. 3 (1992): 585-589.                                                                                                                                                   |
| <i>Solyc12g015690.2</i> | 2.14       | fasciclin-like arabinogalactan protein 1                      | FLA1    | Cell surface adhesion protein; Involved in root and shoot development                                                                                               | <i>Impaired root/shoot development</i>                                                                   | Sultana, Nighat, Hannah V. Florance, Alex Johns, and Nicholas Smirnov. "Ascorbate deficiency influences the leaf cell wall glycoproteome in <i>Arabidopsis thaliana</i> ." <i>Plant, cell &amp; environment</i> 38, no. 2 (2015): 375-384.                                                                                                                                       |
| <i>Solyc01g005290.3</i> | 2.13       | fasciclin-like arabinogalactan protein 1                      | FLA1    | Cell surface adhesion protein; Involved in root and shoot development                                                                                               | <i>Impaired root/shoot development</i>                                                                   | Sultana, Nighat, Hannah V. Florance, Alex Johns, and Nicholas Smirnov. "Ascorbate deficiency influences the leaf cell wall glycoproteome in <i>Arabidopsis thaliana</i> ." <i>Plant, cell &amp; environment</i> 38, no. 2 (2015): 375-384.                                                                                                                                       |
| <i>Solyc03g118780.3</i> | 2.04       | thaumatin-like protein                                        | TLP1    | Involved in local responses of roots to colonization by non-pathogenic plant growth-promoting rhizobacteria fluorescent <i>Pseudomonas</i> spp.                     | <i>Impaired rhizobacterial integration; Impaired growth/development</i>                                  | Leon-Kloosterziel, Karen M., Bas WM Verhagen, Joost JB Keurentjes, Johan A. Van Pelt, Martijn Rep, L. C. Van Loon, and Corne MJ Pieterse. "Colonization of the <i>Arabidopsis</i> rhizosphere by fluorescent <i>Pseudomonas</i> spp. activates a root-specific, ethylene-responsive PR-5 gene in the vascular bundle." <i>Plant molecular biology</i> 57, no. 5 (2005): 731-748. |
| <i>Solyc09g008320.3</i> | 0.92       | probable xyloglucan endotransglucosylase/hydrolase protein 32 | XTH32   | Cleaves and religates xyloglucan polymers, an essential constituent of the primary cell wall, and thereby participates in cell wall construction of growing tissues | <i>Impaired plant cell wall construction; Impaired growth</i>                                            | Bischoff, Volker, Sarah Jane Cookson, Shuang Wu, and Wolf-Rüdiger Scheible. "Thaxtomin A affects CESA-complex density, expression of cell wall genes, cell wall composition, and causes ectopic lignification in <i>Arabidopsis thaliana</i> seedlings." <i>Journal of experimental botany</i> 60, no. 3 (2009): 955-965.                                                        |

| TomatoID                | DE in LsoB | NCBI Protein Name                                              | Gene ID   | Uniprot Description                                                                                                                                                             | Putative Consequences for Infection                                                                                         | Citation                                                                                                                                                                                                                                                                                                                            |
|-------------------------|------------|----------------------------------------------------------------|-----------|---------------------------------------------------------------------------------------------------------------------------------------------------------------------------------|-----------------------------------------------------------------------------------------------------------------------------|-------------------------------------------------------------------------------------------------------------------------------------------------------------------------------------------------------------------------------------------------------------------------------------------------------------------------------------|
| <i>Solyc05g005550.3</i> | 0.92       | polygalacturonase non-catalytic subunit AroGP2 precursor       | GP2       | Non-catalytic subunit of polygalacturonase involved in cell wall organization                                                                                                   | <i>Impaired plant cell wall organization; Impaired growth/development</i>                                                   | N/A                                                                                                                                                                                                                                                                                                                                 |
| <i>Solyc04g063210.3</i> | 0.88       | probable caffeoyl-CoA O-methyltransferase At4g26220 isoform X2 | AT4G26220 | Plays a role in the synthesis of feruloylated polysaccharides; Involved in the reinforcement of the plant cell wall; Involved in response to wounding and/or pathogen challenge | <i>Impaired reinforcement of plant cell walls; Impaired growth; Impaired response to wounding and/or pathogen challenge</i> | Meyermans, Hugo, et al. "Modifications in lignin and accumulation of phenolic glucosides in poplar xylem upon down-regulation of caffeoyl-coenzyme A O-methyltransferase, an enzyme involved in lignin biosynthesis." <i>Journal of Biological Chemistry</i> 275.47 (2000): 36899-36909.                                            |
| <i>Solyc11g019910.1</i> | 0.84       | pectinesterase inhibitor 4                                     | PMEI4     | Pectin methylesterase inhibitor that can target the root-expressed PME17; Regulates de-methylesterification of pectins in roots and affects root growth                         | <i>Impaired root growth/development</i>                                                                                     | Sénéchal, Fabien, Alain Mareck, Paulo Marcelo, Patrice Lerouge, and Jérôme Pelloux. "Arabidopsis PME17 activity can be controlled by pectin methylesterase inhibitor4." <i>Plant signaling &amp; behavior</i> 10, no. 2 (2015): e983351.                                                                                            |
| <i>Solyc05g014000.3</i> | 0.73       | probable pectate lyase 5                                       | At1g67750 | Part of the pathway pectin degradation, which is itself part of Glycan metabolism                                                                                               | <i>Impaired pectin degradation; Impaired cell wall growth/development</i>                                                   | Pischke, Melissa S., Edward L. Huttlin, Adrian D. Hegeman, and Michael R. Sussman. "A transcriptome-based characterization of habituation in plant tissue culture." <i>Plant Physiology</i> 140, no. 4 (2006): 1255-1278.                                                                                                           |
| <i>Solyc10g074540.1</i> | 0.72       | protein EXORDIUM-like 5                                        | EXL5      | Plays a role in a brassinosteroid-dependent regulation of growth and development                                                                                                | <i>Impaired growth and development</i>                                                                                      | Krinke, Ondrej, Eric Ruelland, Olga Valentová, Chantal Vergnolle, Jean-Pierre Renou, Ludvine Taconnat, Matyás Flemr, Lenka Burketová, and Alain Zachowski. "Phosphatidylinositol 4-kinase activation is an early response to salicylic acid in Arabidopsis suspension cells." <i>Plant Physiology</i> 144, no. 3 (2007): 1347-1359. |
| <i>Solyc01g098740.3</i> | 0.71       | probable serine/threonine-protein kinase PBL7                  | PBL7      | Serine/threonine-protein kinase involved in the positive regulation of brassinosteroid signaling and plant growth                                                               | <i>Impaired brassinosteroid signaling; Impaired growth</i>                                                                  | Kim, Tae-Wuk, Shenheng Guan, Alma L. Burlingame, and Zhi-Yong Wang. "The CDG1 kinase mediates brassinosteroid signal transduction from BRI1 receptor kinase to BSU1 phosphatase and GSK3-like kinase BIN2." <i>Molecular cell</i> 43, no. 4 (2011): 561-571.                                                                        |
| <i>Solyc05g009470.3</i> | 0.70       | alpha-xylosidase 1                                             | XYL1      | Glycoside hydrolase releasing xylosyl residues from xyloglucan oligosaccharides; Essential for growth/development                                                               | <i>Impaired growth/development</i>                                                                                          | Sampedro, Javier, et al. "Cloning and expression pattern of a gene encoding an $\alpha$ -xylosidase active against xyloglucan oligosaccharides from Arabidopsis." <i>Plant Physiology</i> 126.2 (2001): 910-920.                                                                                                                    |
| <i>Solyc04g081300.3</i> | 0.70       | endoglucanase 2                                                | At1g19940 | Involved in cellulose catabolism; Involved in cell wall organization                                                                                                            | <i>Impaired cellulose catabolism; Impaired cell wall organization</i>                                                       | Brown, David M., Leo AH Zeef, Joanne Ellis, Royston Goodacre, and Simon R. Turner. "Identification of novel genes in Arabidopsis involved in secondary cell wall formation using expression profiling and reverse genetics." <i>The Plant Cell</i> 17, no. 8 (2005): 2281-2295.                                                     |
| <i>Solyc01g096040.3</i> | 0.65       | aspartyl protease family protein 2                             | APF2      | Involved in response to karrikin, a positive plant growth regulator                                                                                                             | <i>Impaired plant growth</i>                                                                                                | Li, Yurong, Mehdi Kabbage, Wende Liu, and Martin B. Dickman. "Aspartyl protease-mediated cleavage of BAG6 is necessary for autophagy and fungal resistance in plants." <i>The Plant Cell</i> 28, no. 1 (2016): 233-247.                                                                                                             |

| TomatoID                | DE in LsoB | NCBI Protein Name                                                       | Gene ID | Uniprot Description                                                                                                                                                 | Putative Consequences for Infection                                                                                       | Citation                                                                                                                                                                                                                                                                                                                |
|-------------------------|------------|-------------------------------------------------------------------------|---------|---------------------------------------------------------------------------------------------------------------------------------------------------------------------|---------------------------------------------------------------------------------------------------------------------------|-------------------------------------------------------------------------------------------------------------------------------------------------------------------------------------------------------------------------------------------------------------------------------------------------------------------------|
| <i>Solyc04g078520.3</i> | 0.64       | protein RICE SALT SENSITIVE 3-like                                      | RSS3    | Represses jasmonate-induced genes; Involved in transcriptional regulation in the root tip; Regulates root cell elongation during salt stress                        | <i>Impaired repression of jasmonate-induced genes; Increased jasmonate-related defense; Impaired root cell elongation</i> | Toda, Yosuke, Maiko Tanaka, Daisuke Ogawa, Kyo Kurata, Ken-ichi Kurotani, Yoshiki Habu, Tsuyu Ando et al. "RICE SALT SENSITIVE3 forms a ternary complex with JAZ and class-C bHLH factors and regulates jasmonate-induced gene expression and root cell elongation." <i>The Plant Cell</i> 25, no. 5 (2013): 1709-1725. |
| <i>Solyc01g104400.3</i> | 0.61       | basic blue protein                                                      | ARPN    | Forms a concentration gradient along the pollen tube growth path                                                                                                    | <i>Impaired pollen tube growth</i>                                                                                        | Dong, Juan, Sun Tae Kim, and Elizabeth M. Lord. "Plantacyanin plays a role in reproduction in Arabidopsis." <i>Plant Physiology</i> 138, no. 2 (2005): 778-789.                                                                                                                                                         |
| <i>Solyc12g005020.2</i> | 0.60       | NEP1-interacting protein-like 1 isoform X1                              | ATL27   | Involved in the early steps of the plant defense signaling pathway                                                                                                  | <i>Impaired plant defense</i>                                                                                             | Libault, Marc, Jinrong Wan, Tomasz Czechowski, Michael Udvardi, and Gary Stacey. "Identification of 118 Arabidopsis transcription factor and 30 ubiquitin-ligase genes responding to chitin, a plant-defense elicitor." <i>Molecular plant-microbe interactions</i> 20, no. 8 (2007): 900-911.                          |
| <i>Solyc12g044310.2</i> | 0.57       | protein NRT1/ PTR FAMILY 1.2                                            | NPF1.2  | Low-affinity nitrate transporter involved in xylem-to-phloem transfer for redistributing nitrate into developing leaves                                             | <i>Impaired nitrate transport; Impaired growth/development</i>                                                            | Hsu, Po-Kai, and Yi-Fang Tsay. "Two phloem nitrate transporters, NRT1. 11 and NRT1. 12, are important for redistributing xylem-borne nitrate to enhance plant growth." <i>Plant Physiology</i> 163, no. 2 (2013): 844-856.                                                                                              |
| <i>Solyc09g008860.3</i> | 0.56       | leucine-rich repeat receptor-like protein kinase PXC1                   | PXC1    | Involved in secondary cell wall formation in xylem fibers; Regulates interfascicular fiber cell maturation; Promotes secondary wall formation during cell expansion | <i>Impaired xylem growth; Impaired fiber cell maturation; Impaired cell expansion</i>                                     | Wang, Jiehua, Melis Kucukoglu, Linbin Zhang, Peng Chen, Daniel Decker, Ove Nilsson, Brian Jones, Göran Sandberg, and Bo Zheng. "The Arabidopsis LRR-RLK, PXC1, is a regulator of secondary wall formation correlated with the TDIF-PXY/TDR-WOX4 signaling pathway." <i>BMC plant biology</i> 13, no. 1 (2013): 1-11.    |
| <i>Solyc02g080160.3</i> | 0.51       | probable xyloglucan endotransglucosylase/hydrolase protein 8 isoform X2 | XTH8    | Cleaves and religates xyloglucan polymers, an essential constituent of the primary cell wall, and thereby participates in cell wall construction of growing tissues | <i>Impaired plant cell wall growth/development</i>                                                                        | Bischoff, Volker, Sarah Jane Cookson, Shuang Wu, and Wolf-Rüdiger Scheible. "Thaxtomin A affects CESA-complex density, expression of cell wall genes, cell wall composition, and causes ectopic lignification in Arabidopsis thaliana seedlings." <i>Journal of experimental botany</i> 60, no. 3 (2009): 955-965.      |
| <i>Solyc06g008990.1</i> | 0.49       | protein FANTASTIC FOUR 1-like                                           | FAF1    | Represses WUS, a gene related to plant organ development, when constitutively overexpressed                                                                         | <i>Impaired growth and development</i>                                                                                    | Wahl, Vanessa, Luise H. Brand, Ya-Long Guo, and Markus Schmid. "The FANTASTIC FOUR proteins influence shoot meristem size in Arabidopsis thaliana." <i>BMC Plant Biology</i> 10, no. 1 (2010): 1-12.                                                                                                                    |
| <i>Solyc07g062260.3</i> | 0.47       | BES1/BZR1 homolog protein 4                                             | BEH4    | Involved in brassinosteroid mediated signaling pathway                                                                                                              | <i>Impaired plant development and physiological regulation</i>                                                            | Wang, Zhi-Yong, Takeshi Nakano, Joshua Gendron, Junxian He, Meng Chen, Dionne Vafeados, Yanli Yang et al. "Nuclear-localized BZR1 mediates brassinosteroid-induced growth and feedback suppression of brassinosteroid biosynthesis." <i>Developmental cell</i> 2, no. 4 (2002): 505-513.                                |
| <i>Solyc04g016200.1</i> | 0.46       | zeatin O-glucosyltransferase                                            | ZOG1    | Regulates active vs storage forms of cytokinins                                                                                                                     | <i>Impaired seed development</i>                                                                                          | Hou, Bingkai, Eng-Kiat Lim, Gillian S. Higgins, and Dianna J. Bowles. "N-glycosylation of cytokinins by glucosyltransferases of Arabidopsis thaliana." <i>Journal of Biological Chemistry</i> 279, no. 46 (2004): 47822-47832.                                                                                          |

| TomatoID                | DE in LsoB | NCBI Protein Name                                        | Gene ID   | Uniprot Description                                                                                                                                                 | Putative Consequences for Infection                                                   | Citation                                                                                                                                                                                                                                                                                                                                                                       |
|-------------------------|------------|----------------------------------------------------------|-----------|---------------------------------------------------------------------------------------------------------------------------------------------------------------------|---------------------------------------------------------------------------------------|--------------------------------------------------------------------------------------------------------------------------------------------------------------------------------------------------------------------------------------------------------------------------------------------------------------------------------------------------------------------------------|
| <i>Solyc10g080940.2</i> | 0.46       | tubulin beta-5 chain                                     | TUBB5     | Tubulin is the major constituent of microtubules                                                                                                                    | <i>Impaired microtubule development</i>                                               | Cao, Dongni, Hui Cheng, Wei Wu, Hui Meng Soo, and Jinrong Peng. "Gibberellin mobilizes distinct DELLA-dependent transcriptomes to regulate seed germination and floral development in Arabidopsis." <i>Plant physiology</i> 142, no. 2 (2006): 509-525.                                                                                                                        |
| <i>Solyc12g027550.1</i> | 0.45       | photosystem II CP43 chlorophyll apoprotein               | psbC      | Photosynthetic electron transporter in photosystem II                                                                                                               | <i>Impaired photosynthesis</i>                                                        | Xu, Hong, Dmitrii Vavilin, and Wim Vermaas. "Chlorophyll b can serve as the major pigment in functional photosystem II complexes of cyanobacteria." <i>Proceedings of the National Academy of Sciences</i> 98, no. 24 (2001): 14168-14173.                                                                                                                                     |
| <i>Solyc05g005560.4</i> | 0.41       | polygalacturonase-1 non-catalytic subunit beta precursor | GP2       | Non-catalytic subunit of polygalacturonase involved in cell wall organization                                                                                       | <i>Impaired plant cell wall organization; Impaired growth/development</i>             | N/A                                                                                                                                                                                                                                                                                                                                                                            |
| <i>Solyc03g123630.3</i> | 0.41       | pectinesterase/pectinesterase inhibitor U1 precursor     | PMEU1     | Acts in the modification of cell walls via demethylesterification of cell wall pectin                                                                               | <i>Impaired plant cell wall modification/development; Impaired growth/development</i> | Phan, Thanh D., Wen Bo, Gill West, Grantley W. Lycett, and Gregory A. Tucker. "Silencing of the major salt-dependent isoform of pectinesterase in tomato alters fruit softening." <i>Plant physiology</i> 144, no. 4 (2007): 1960-1967.                                                                                                                                        |
| <i>Solyc01g110340.3</i> | 0.41       | endoglucanase 24-like                                    | At4g39010 | Involved in fruit dehiscence and fruit valve development; Involved in plant cell wall loosening                                                                     | <i>Impaired fruit development</i>                                                     | Urbanowicz, Breeanna R., Alan B. Bennett, Elena Del Campillo, Carmen Catalá, Takahisa Hayashi, Bernard Henrissat, Herman Höfte et al. "Structural organization and a standardized nomenclature for plant endo-1, 4-β-glucanases (cellulases) of glycosyl hydrolase family 9." <i>Plant Physiology</i> 144, no. 4 (2007): 1693-1696.                                            |
| <i>Solyc06g034390.1</i> | 0.40       | protein EXORDIUM-like 3                                  | EXL3      | Plays a role in a brassinosteroid-dependent regulation of growth and development                                                                                    | <i>Impaired growth and development</i>                                                | Krinke, Ondrej, Eric Ruelland, Olga Valentová, Chantal Vergnolle, Jean-Pierre Renou, Ludivine Taconnat, Matyás Flemr, Lenka Burketová, and Alain Zachowski. "Phosphatidylinositol 4-kinase activation is an early response to salicylic acid in Arabidopsis suspension cells." <i>Plant Physiology</i> 144, no. 3 (2007): 1347-1359.                                           |
| <i>Solyc07g052980.3</i> | 0.39       | xyloglucan endotransglycosylase/hydrolase 16 precursor   | XTH16     | Cleaves and religates xyloglucan polymers, an essential constituent of the primary cell wall, and thereby participates in cell wall construction of growing tissues | <i>Impaired plant cell wall expansion; Impaired growth/development</i>                | Sasidharan, Rashmi, C. C. Chinnappa, Marten Staal, J. Theo M. Elzenga, Ryusuke Yokoyama, Kazuhiko Nishitani, Laurentius ACJ Voeseenek, and Ronald Pierik. "Light quality-mediated petiole elongation in Arabidopsis during shade avoidance involves cell wall modification by xyloglucan endotransglucosylase/hydrolases." <i>Plant physiology</i> 154, no. 2 (2010): 978-990. |
| <i>Solyc02g090960.1</i> | 0.36       | protein RALF-like 34                                     | RALFL34   | Cell signaling peptide that regulates plant stress, growth, and development                                                                                         | <i>Impaired response to plant stress, growth, and development</i>                     | Murphy, Evan, Lam Dai Vu, Lisa Van den Broeck, Zhefeng Lin, Priya Ramakrishna, Brigitte Van De Cotte, Allison Gaudinier et al. "RALFL34 regulates formative cell divisions in Arabidopsis pericycle during lateral root initiation." <i>Journal of Experimental Botany</i> 67, no. 16 (2016): 4863-4875.                                                                       |

| TomatoID                | DE in LsoB | NCBI Protein Name                                        | Gene ID   | Uniprot Description                                                                                                                                                | Putative Consequences for Infection                                                                                    | Citation                                                                                                                                                                                                                                                                                                                                                           |
|-------------------------|------------|----------------------------------------------------------|-----------|--------------------------------------------------------------------------------------------------------------------------------------------------------------------|------------------------------------------------------------------------------------------------------------------------|--------------------------------------------------------------------------------------------------------------------------------------------------------------------------------------------------------------------------------------------------------------------------------------------------------------------------------------------------------------------|
| <i>Solyc06g062960.2</i> | 0.35       | protein RALF-like 34                                     | RALFL34   | Cell signaling peptide that may regulate plant stress, growth, and development                                                                                     | <i>Impaired response to plant stress, growth, and development</i>                                                      | Murphy, Evan, Lam Dai Vu, Lisa Van den Broeck, Zhefeng Lin, Priya Ramakrishna, Brigitte Van De Cotte, Allison Gaudinier et al. "RALFL34 regulates formative cell divisions in Arabidopsis pericycle during lateral root initiation." <i>Journal of Experimental Botany</i> 67, no. 16 (2016): 4863-4875.                                                           |
| <i>Solyc09g009010.3</i> | 0.35       | glucomannan 4-beta-mannosyltransferase 9-like isoform X2 | CSLA9     | Required for lateral root development; Involved in cell wall organization; Involved in response to bacteria                                                        | <i>Impaired lateral root development; Impaired plant cell wall organization; Impaired defense response to bacteria</i> | Liepman, Aaron H., C. Joseph Nairn, William GT Willats, Iben Sørensen, Alison W. Roberts, and Kenneth Keegstra. "Functional genomic analysis supports conservation of function among cellulose synthase-like a gene family members and suggests diverse roles of mannans in plants." <i>Plant Physiology</i> 143, no. 4 (2007): 1881-1893.                         |
| <i>Solyc09g008990.3</i> | 0.35       | glucomannan 4-beta-mannosyltransferase 9-like isoform X2 | CSLA9     | Required for lateral root development; Involved in cell wall organization; Involved in response to bacteria                                                        | <i>Impaired lateral root development; Impaired plant cell wall organization; Impaired defense response to bacteria</i> | Liepman, Aaron H., C. Joseph Nairn, William GT Willats, Iben Sørensen, Alison W. Roberts, and Kenneth Keegstra. "Functional genomic analysis supports conservation of function among cellulose synthase-like a gene family members and suggests diverse roles of mannans in plants." <i>Plant Physiology</i> 143, no. 4 (2007): 1881-1893.                         |
| <i>Solyc02g078850.1</i> | 0.34       | glycine-rich cell wall structural protein 1.8            | At3g17050 | Responsible for plasticity of plant cell wall                                                                                                                      | <i>Impaired plant cell wall modification/development</i>                                                               | Quigley, Françoise, Marie-Louise Villiot, and Régis Mache. "Nucleotide sequence and expression of a novel glycine-rich protein gene from Arabidopsis thaliana." <i>Plant molecular biology</i> 17, no. 4 (1991): 949-952.                                                                                                                                          |
| <i>Solyc12g099260.2</i> | 0.34       | ATP-citrate synthase beta chain protein 2-like           | ACLA-2    | Used for the elongation of fatty acids and biosynthesis of isoprenoids, flavonoids, and malonated derivatives; Required for normal growth and development in seeds | <i>Impaired seed development; Impaired production of primary metabolites</i>                                           | Fatland, Beth L., Basil J. Nikolau, and Eve Syrkin Wurtele. "Reverse genetic characterization of cytosolic acetyl-CoA generation by ATP-citrate lyase in Arabidopsis." <i>The Plant Cell</i> 17.1 (2005): 182-203.                                                                                                                                                 |
| <i>Solyc11g066720.2</i> | 0.33       | UDP-D-apiose/UDP-D-xylose synthase 2                     | AXS2      | Catalyzes the conversion of UDP-D-glucuronate to a mixture of UDP-D-apiose and UDP-D-xylose, a plant cell wall monosaccharide with a unique role                   | <i>Impaired plant cell wall modification/development</i>                                                               | Møhlhøj, Michael, Rajeev Verma, and Wolf-Dieter Reiter. "The biosynthesis of the branched-chain sugar d-apiose in plants: functional cloning and characterization of a UDP-d-apiose/UDP-d-xylose synthase from Arabidopsis." <i>The Plant Journal</i> 35, no. 6 (2003): 693-703.                                                                                   |
| <i>Solyc10g061830.2</i> | 0.32       | photosystem II 44 kDa protein                            | psbC      | Photosynthetic electron transporter in photosystem II                                                                                                              | <i>Impaired photosynthesis</i>                                                                                         | Ahmed, Ibrar, Peter J. Matthews, Patrick J. Biggs, Muhammad Naeem, Patricia A. McLenachan, and Peter J. Lockhart. "Identification of chloroplast genome loci suitable for high-resolution phylogeographic studies of <i>C. olocasia esculenta</i> (L.) S chott (A raceae) and closely related taxa." <i>Molecular Ecology Resources</i> 13, no. 5 (2013): 929-937. |
| <i>Solyc04g077020.3</i> | 0.28       | tubulin alpha chain                                      | TUBA1     | Tubulin is the major constituent of microtubules                                                                                                                   | <i>Impaired microtubule development</i>                                                                                | Saito, Yuka, Kouichi Soga, Kazuyuki Wakabayashi, and Takayuki Hoson. "Increase in expression level of alpha-tubulin gene in Arabidopsis seedlings under hypergravity conditions." <i>Uchu Seibutsu Kagaku</i> 17, no. 3 (2003): 177-178.                                                                                                                           |

| TomatoID                | DE in LsoB | NCBI Protein Name                         | Gene ID   | Uniprot Description                                                                                                           | Putative Consequences for Infection                                                              | Citation                                                                                                                                                                                                                                                                                                                                                                                                                                        |
|-------------------------|------------|-------------------------------------------|-----------|-------------------------------------------------------------------------------------------------------------------------------|--------------------------------------------------------------------------------------------------|-------------------------------------------------------------------------------------------------------------------------------------------------------------------------------------------------------------------------------------------------------------------------------------------------------------------------------------------------------------------------------------------------------------------------------------------------|
| <i>Solyc02g030480.3</i> | 0.28       | probable cinnamyl alcohol dehydrogenase 6 | CAD6      | Involved in lignin biosynthesis                                                                                               | <i>Impaired lignin biosynthesis; Impaired plant cell wall growth/development</i>                 | Costa, Michael A., R. Eric Collins, Aldwin M. Anterola, Fiona C. Cochrane, Laurence B. Davin, and Norman G. Lewis. "An in silico assessment of gene function and organization of the phenylpropanoid pathway metabolic networks in <i>Arabidopsis thaliana</i> and limitations thereof." <i>Phytochemistry</i> 64, no. 6 (2003): 1097-1112.                                                                                                     |
| <i>Solyc01g111350.3</i> | 0.28       | protein NUCLEAR FUSION DEFECTIVE 4        | NFD4      | Required for karyogamy during female gametophyte development                                                                  | <i>Impaired female gametophyte development</i>                                                   | Portereiko, Michael F., Linda Sandaklie-Nikolova, Alan Lloyd, Chad A. Dever, Denichiro Otsuga, and Gary N. Drews. "NUCLEAR FUSION DEFECTIVE1 encodes the <i>Arabidopsis</i> RPL21M protein and is required for karyogamy during female gametophyte development and fertilization." <i>Plant physiology</i> 141, no. 3 (2006): 957-965.                                                                                                          |
| <i>Solyc02g065170.3</i> | 0.27       | L-ascorbate oxidase homolog               | AAO       | Represses responses to high salinity and oxidative stress conditions such as vegetative growth and seed production reductions | <i>Impaired regulation of stress responses; Impaired growth/development under stress</i>         | Yamamoto, Atsuko, Md Nazmul H. Bhuiyan, Rungaroon Waditee, Yoshito Tanaka, Muneharu Esaka, Kazuko Oba, André T. Jagendorf, and Teruhiro Takabe. "Suppressed expression of the apoplasmic ascorbate oxidase gene increases salt tolerance in tobacco and <i>Arabidopsis</i> plants." <i>Journal of Experimental Botany</i> 56, no. 417 (2005): 1785-1796.                                                                                        |
| <i>Solyc04g053000.1</i> | 0.27       | auxin-responsive protein SAUR21-like      | SAUR21    | Positive effectors of cell expansion through modulation of auxin transport                                                    | <i>Impaired plant cell wall expansion; Impaired growth/development; Impaired auxin transport</i> | Osakabe, Yuriko, Kyonoshin Maruyama, Motoaki Seki, Masakazu Satou, Kazuo Shinozaki, and Kazuko Yamaguchi-Shinozaki. "Leucine-rich repeat receptor-like kinase1 is a key membrane-bound regulator of abscisic acid early signaling in <i>Arabidopsis</i> ." <i>The Plant Cell</i> 17, no. 4 (2005): 1105-1119.                                                                                                                                   |
| <i>Solyc03g112880.1</i> | 0.27       | fasciclin-like arabinogalactan protein 4  | FLA4      | Cell surface adhesion protein required for normal cell expansion                                                              | <i>Impaired cell expansion; Impaired growth/development</i>                                      | Xu, Shou-Ling, et al. "Two leucine-rich repeat receptor kinases mediate signaling, linking cell wall biosynthesis and ACC synthase in <i>Arabidopsis</i> ." <i>The Plant Cell</i> 20.11 (2008): 3065-3079.                                                                                                                                                                                                                                      |
| <i>Solyc05g005710.3</i> | 0.26       | spermidine synthase                       | SPDS1     | Involved in polyamine biosynthetic process                                                                                    | <i>Impaired polyamine biosynthesis; Impaired cell proliferation</i>                              | Cheng, Chia-Yi, Vivek Krishnakumar, Agnes P. Chan, Françoise Thibaud-Nissen, Seth Schobel, and Christopher D. Town. "Araport11: a complete reannotation of the <i>Arabidopsis thaliana</i> reference genome." <i>The Plant Journal</i> 89, no. 4 (2017): 789-804.                                                                                                                                                                               |
| <i>Solyc01g102330.3</i> | 0.24       | probable carbohydrate esterase At4g34215  | At4g34215 | Involved in secondary plant cell wall biosynthesis                                                                            | <i>Impaired secondary plant cell wall biosynthesis; Impaired growth</i>                          | Andersson-Gunnerås, Sara, Ewa J. Mellerowicz, Jonathan Love, Bo Segerman, Yasunori Ohmiya, Pedro M. Coutinho, Peter Nilsson, Bernard Henrissat, Thomas Moritz, and Björn Sundberg. "Biosynthesis of cellulose-enriched tension wood in <i>Populus</i> : global analysis of transcripts and metabolites identifies biochemical and developmental regulators in secondary wall biosynthesis." <i>The Plant Journal</i> 45, no. 2 (2006): 144-165. |

| TomatoID                | DE in LsoB | NCBI Protein Name                        | Gene ID   | Uniprot Description                                                                                                                          | Putative Consequences for Infection                                                                                                             | Citation                                                                                                                                                                                                                                                                                                   |
|-------------------------|------------|------------------------------------------|-----------|----------------------------------------------------------------------------------------------------------------------------------------------|-------------------------------------------------------------------------------------------------------------------------------------------------|------------------------------------------------------------------------------------------------------------------------------------------------------------------------------------------------------------------------------------------------------------------------------------------------------------|
| <i>Solyc02g087190.1</i> | 0.22       | peroxidase 63                            | PER63     | Involved in oxidation of toxic reductants, lignin metabolism, suberization, auxin catabolism; Involved in response to environmental stresses | <i>Impaired plant defense; Impaired lignin metabolism; Impaired cell wall expansion; Impaired growth/development; Impaired auxin catabolism</i> | Valério, Luisa, Mireille De Meyer, Claude Penel, and Christophe Dunand. "Expression analysis of the Arabidopsis peroxidase multigenic family." <i>Phytochemistry</i> 65, no. 10 (2004): 1331-1342.                                                                                                         |
| <i>Solyc09g014490.3</i> | 0.22       | endochitinase A                          | At2g43590 | Involved in plant cell wall macromolecule catabolism and chitin catabolism; Involved in defense response                                     | <i>Impaired plant cell wall development; Impaired defense response</i>                                                                          | Krysan, Patrick J., Peter J. Jester, Jennifer R. Gottwald, and Michael R. Sussman. "An Arabidopsis mitogen-activated protein kinase kinase gene family encodes essential positive regulators of cytokinesis." <i>The Plant Cell</i> 14, no. 5 (2002): 1109-1120.                                           |
| <i>Solyc03g044150.3</i> | 0.20       | subtilisin-like protease SBT1.7          | SBT1.7    | Serine protease essential for mucilage release from seed coats                                                                               | <i>Impaired seed coat development</i>                                                                                                           | Rautengarten, Carsten, Björn Usadel, Lutz Neumetzler, Jürgen Hartmann, Dirk Büssis, and Thomas Altmann. "A subtilisin-like serine protease essential for mucilage release from Arabidopsis seed coats." <i>The Plant Journal</i> 54, no. 3 (2008): 466-480.                                                |
| <i>Solyc12g009110.2</i> | 0.20       | acetylserotonin O-methyltransferase      | ASMT      | Methyltransferase which catalyzes the production of melatonin; Involved in response to light stress                                          | <i>Impaired development under light stress</i>                                                                                                  | Shi, Haitao, Yunxie Wei, and Chaozuo He. "Melatonin-induced CBF/DREB1s are essential for diurnal change of disease resistance and CCA1 expression in Arabidopsis." <i>Plant Physiology and Biochemistry</i> 100 (2016): 150-155.                                                                           |
| <i>Solyc11g066820.2</i> | 0.14       | glucomannan 4-beta-mannosyltransferase 2 | CSLA2     | Possesses glucomannan synthase and mannan synthase activities; Galactomannan is a noncellulosic polysaccharides of plant cell wall           | <i>Impaired plant cell wall growth/development</i>                                                                                              | Liepmann, Aaron H., Curtis G. Wilkerson, and Kenneth Keegstra. "Expression of cellulose synthase-like (Csl) genes in insect cells reveals that CslA family members encode mannan synthases." <i>Proceedings of the National Academy of Sciences</i> 102, no. 6 (2005): 2221-2226.                          |
| <i>Solyc01g006370.3</i> | 0.14       | callose synthase 3-like                  | CALS3     | Involved in callose synthesis at the forming cell plate during cytokinesis                                                                   | <i>Impaired callose synthesis; Impaired cell proliferation; Impaired growth/development</i>                                                     | Chen, Xiong-Yan, Lin Liu, EunKyung Lee, Xiao Han, Yeonggil Rim, Hyosub Chu, Seon-Won Kim, Fred Sack, and Jae-Yean Kim. "The Arabidopsis callose synthase gene GSL8 is required for cytokinesis and cell patterning." <i>Plant Physiology</i> 150, no. 1 (2009): 105-113.                                   |
| <i>Solyc10g086650.1</i> | 0.12       | aldehyde oxidase GLOX                    | GLOX1     | Regulated by the transcription factor MYB80 during anther development and plays a role in tapetum and pollen development                     | <i>Impaired pollen development</i>                                                                                                              | Phan, Huy Anh, Sylvania Iaccone, Song F. Li, and Roger W. Parish. "The MYB80 transcription factor is required for pollen development and the regulation of tapetal programmed cell death in Arabidopsis thaliana." <i>The Plant Cell</i> 23, no. 6 (2011): 2209-2224.                                      |
| <i>Solyc07g055950.3</i> | 0.12       | protodermal factor 1                     | PDF1      | Involved in the regulation of meristem growth                                                                                                | <i>Impaired growth and development</i>                                                                                                          | Pholo, Motlalepula, Beatrix Coetzee, Hans J. Maree, Philip R. Young, James R. Lloyd, Jens Kossmann, and Paul N. Hills. "Cell division and turgor mediate enhanced plant growth in Arabidopsis plants treated with the bacterial signalling molecule lumichrome." <i>Planta</i> 248, no. 2 (2018): 477-488. |
| <i>Solyc11g013270.2</i> | 0.12       | O-fucosyltransferase 10-like             | FUT10     | Involved in cell wall biosynthesis                                                                                                           | <i>Impaired plant cell wall growth/development</i>                                                                                              | Sarria, Rodrigo, Tanya A. Wagner, Malcolm A. O'Neill, Ahmed Faik, Curtis G. Wilkerson, Kenneth Keegstra, and Natasha V. Raikhel. "Characterization of a family of Arabidopsis genes related to xyloglucan fucosyltransferase1." <i>Plant Physiology</i> 127, no. 4 (2001): 1595-1606.                      |

| TomatoID                | DE in LsoB | NCBI Protein Name                               | Gene ID | Uniprot Description                                                                                                                                                                           | Putative Consequences for Infection                                                                                      | Citation                                                                                                                                                                                                                                                                                                                                                  |
|-------------------------|------------|-------------------------------------------------|---------|-----------------------------------------------------------------------------------------------------------------------------------------------------------------------------------------------|--------------------------------------------------------------------------------------------------------------------------|-----------------------------------------------------------------------------------------------------------------------------------------------------------------------------------------------------------------------------------------------------------------------------------------------------------------------------------------------------------|
| <i>Solyc04g016480.3</i> | 0.10       | protein IQ-DOMAIN 14                            | IQD14   | Involved in cooperative interactions with calmodulins or calmodulin-like proteins; Scaffold in cellular signaling and trafficking; Regulates cell and organ shapes                            | <i>Impaired cell-to-cell signaling and trafficking; Impaired regulation of plant organ shape</i>                         | Bürstenbinder, Katharina, Birgit Möller, Romina Plötner, Gina Stamm, Gerd Hause, Dipannita Mitra, and Steffen Abel. "The IQD family of calmodulin-binding proteins links calcium signaling to microtubules, membrane subdomains, and the nucleus." <i>Plant physiology</i> 173, no. 3 (2017): 1692-1708.                                                  |
| <i>Solyc06g071500.3</i> | 0.09       | probable boron transporter 2                    | BOR2    | Boron transporter essential for maintaining the integrity of plants cell walls                                                                                                                | <i>Impaired plant cell wall growth/development</i>                                                                       | Takano, Junpei, Kyotaro Noguchi, Miho Yasumori, Masaharu Kobayashi, Zofia Gajdos, Kyoko Miwa, Hiroaki Hayashi, Tadakatsu Yoneyama, and Toru Fujiwara. "Arabidopsis boron transporter for xylem loading." <i>Nature</i> 420, no. 6913 (2002): 337-340.                                                                                                     |
| <i>Solyc01g106580.2</i> | 0.08       | probable pectin methylesterase CGR3             | CGR3    | Together with CGR2, required for homogalacturonan pectins (HG) methylesterification in the Golgi apparatus prior to integration into cell walls, essential for general growth and development | <i>Impaired growth and development; Impaired plant cell wall growth/development</i>                                      | M. Weraduwege, Sarathi, Sang-Jin Kim, Luciana Renna, Francisca C. Anozie, Thomas D. Sharkey, and Federica Brandizzi. "Pectin methylesterification impacts the relationship between photosynthesis and plant growth." <i>Plant Physiology</i> 171, no. 2 (2016): 833-848.                                                                                  |
| <i>Solyc08g061930.3</i> | 0.07       | cytokinin oxidase/dehydrogenase-like isoform X2 | CKX2    | Involved in cytokinin catabolism                                                                                                                                                              | <i>Impaired cytokinin catabolism; Impaired plant root/shoot development</i>                                              | Werner, Tomáš, Václav Motyka, Valérie Laucou, Rafaël Smets, Harry Van Onckelen, and Thomas Schmülling. "Cytokinin-deficient transgenic Arabidopsis plants show multiple developmental alterations indicating opposite functions of cytokinins in the regulation of shoot and root meristem activity." <i>The Plant Cell</i> 15, no. 11 (2003): 2532-2550. |
| <i>Solyc04g081490.3</i> | 0.07       | beta-tubulin                                    | TUBB1   | Tubulin is the major constituent of microtubules                                                                                                                                              | <i>Impaired microtubule development</i>                                                                                  | Cao, Dongni, Hui Cheng, Wei Wu, Hui Meng Soo, and Jinrong Peng. "Gibberellin mobilizes distinct DELLA-dependent transcriptomes to regulate seed germination and floral development in Arabidopsis." <i>Plant physiology</i> 142, no. 2 (2006): 509-525.                                                                                                   |
| <i>Solyc09g015080.3</i> | 0.05       | patellin-6                                      | PATL6   | Carrier protein involved in membrane-trafficking associated with cell-plate formation during cytokinesis; Involved in cellular division; Involved in auxin polar transport                    | <i>Impaired cellular division; Impaired growth/development; Impaired auxin transport</i>                                 | Zhou, Huapeng, Hongqin Duan, Yunhong Liu, Xia Sun, Jinfeng Zhao, and Honghui Lin. "Patellin protein family functions in plant development and stress response." <i>Journal of plant physiology</i> 234 (2019): 94-97.                                                                                                                                     |
| <i>Solyc04g053010.1</i> | 0.04       | auxin-responsive protein SAUR68-like            | SAUR68  | Promote auxin-stimulated organ elongation, such as hypocotyls, stamen filaments and petals                                                                                                    | <i>Impaired organ elongation; Impaired growth and development; Impaired auxin signaling; Impaired flower development</i> | Zhao, Yunde, Xinhua Dai, Helen E. Blackwell, Stuart L. Schreiber, and Joanne Chory. "SIR1, an upstream component in auxin signaling identified by chemical genetics." <i>Science</i> 301, no. 5636 (2003): 1107-1110.                                                                                                                                     |
| <i>Solyc02g085870.3</i> | -1.00      | 3-ketoacyl-CoA synthase 6                       | CUT1    | Major condensing enzyme for stem wax and pollen coat lipid biosynthesis                                                                                                                       | <i>Increased wax and pollen coat biosynthesis; Cell wall expansion; Impaired growth/development</i>                      | Kunst, Ljerka, and A. Lacey Samuels. "Biosynthesis and secretion of plant cuticular wax." <i>Progress in lipid research</i> 42, no. 1 (2003): 51-80.                                                                                                                                                                                                      |



| TomatoID         | DE in LsoB | NCBI Protein Name                                             | Gene ID | Uniprot Description                                                                                                                                                                                                                                                                                                                                                                                                              | Putative Consequences for Infection                                                                                                                             | Citation                                                                                                                                                                                                                                                                                                                                                                   |
|------------------|------------|---------------------------------------------------------------|---------|----------------------------------------------------------------------------------------------------------------------------------------------------------------------------------------------------------------------------------------------------------------------------------------------------------------------------------------------------------------------------------------------------------------------------------|-----------------------------------------------------------------------------------------------------------------------------------------------------------------|----------------------------------------------------------------------------------------------------------------------------------------------------------------------------------------------------------------------------------------------------------------------------------------------------------------------------------------------------------------------------|
| Solyc06g075310.3 | -1.02      | adenylate kinase isoenzyme 6 homolog isoform X1               | AAK6    | Kinase that catalyzes the reversible transfer of the terminal phosphate group between nucleoside triphosphates and monophosphates                                                                                                                                                                                                                                                                                                | Promoted stem growth                                                                                                                                            | Feng, Xue, Ruonan Yang, Xiaofeng Zheng, and FeiYun Zhang. "Identification of a novel nuclear-localized adenylate kinase 6 from <i>Arabidopsis thaliana</i> as an essential stem growth factor." <i>Plant physiology and biochemistry</i> 61 (2012): 180-186.                                                                                                               |
| Solyc12g099900.1 | -1.05      | scarecrow-like protein 3                                      | SCL3    | Transcription factor involved in plant development                                                                                                                                                                                                                                                                                                                                                                               | Promoted plant growth and development                                                                                                                           | Zhang, Zhong-Lin, Mikihiro Ogawa, Christine M. Fleet, Rodolfo Zentella, Jianhong Hu, Jung-Ok Heo, Jun Lim, Yuji Kamiya, Shinjiro Yamaguchi, and Tai-ping Sun. "Scarecrow-like 3 promotes gibberellin signaling by antagonizing master growth repressor DELLA in <i>Arabidopsis</i> ." <i>Proceedings of the National Academy of Sciences</i> 108, no. 5 (2011): 2160-2165. |
| Solyc07g032480.3 | -1.06      | cyclin-T1-3                                                   | CYCT1-3 | Involved in cellular division; Positive regulator of DNA-templated transcription; Regulates transcription of RNA polymerase II                                                                                                                                                                                                                                                                                                   | Promoted cellular division; Increased DNA-templated transcription                                                                                               | Cui, Xiaofeng, Baofang Fan, James Scholz, and Zhixiang Chen. "Roles of <i>Arabidopsis</i> cyclin-dependent kinase C complexes in cauliflower mosaic virus infection, plant growth, and development." <i>The Plant Cell</i> 19, no. 4 (2007): 1388-1402.                                                                                                                    |
| Solyc02g077080.3 | -1.07      | protein trichome birefringence-like 38                        | TBL38   | Bridging protein that binds pectin and other cell wall polysaccharides                                                                                                                                                                                                                                                                                                                                                           | Promoted pectin-binding; Promoted plant cell wall growth and development                                                                                        | Bischoff, Volker, Joachim Selbig, and Wolf-Rüdiger Scheible. "Involvement of TBL/DUF231 proteins into cell wall biology." <i>Plant signaling &amp; behavior</i> 5, no. 8 (2010): 1057-1059.                                                                                                                                                                                |
| Solyc07g006130.2 | -1.08      | eukaryotic peptide chain release factor subunit 1-3-like      | ERF1-3  | Directs the termination of nascent peptide synthesis; Modulates plant growth and development                                                                                                                                                                                                                                                                                                                                     | Promoted plant growth and development                                                                                                                           | Chapman, Bernice, and Chris Brown. "Translation termination in <i>Arabidopsis thaliana</i> : characterisation of three versions of release factor 1." <i>Gene</i> 341 (2004): 219-225.                                                                                                                                                                                     |
| Solyc05g046290.3 | -1.14      | probable xyloglucan endotransglucosylase/hydrolase protein 23 | XTH23   | Cleaves and religates xyloglucan polymers, an essential constituent of the primary cell wall, and thereby participates in cell wall construction of growing tissues                                                                                                                                                                                                                                                              | Promoted plant growth and development                                                                                                                           | Bischoff, Volker, Sarah Jane Cookson, Shuang Wu, and Wolf-Rüdiger Scheible. "Thaxtomin A affects CESA-complex density, expression of cell wall genes, cell wall composition, and causes ectopic lignification in <i>Arabidopsis thaliana</i> seedlings." <i>Journal of experimental botany</i> 60, no. 3 (2009): 955-965.                                                  |
| Solyc01g111640.3 | -1.14      | SKP1-like protein 1A                                          | SKP1A   | Involved in ubiquitination and subsequent proteasomal degradation of target proteins; Required for vegetative and floral organ development as well as for male gametogenesis; Involved in auxin signaling pathway; Regulates responses to jasmonates; Involved in light-signaling and the circadian clock; Plays a role during embryogenesis and early postembryonic development, especially during cell elongation and division | Promoted protein ubiquitination; Promoted floral development and male gametogenesis; Promoted auxin signaling; Promoted circadian clock; Promoted embryogenesis | Zhao, Dazhong, Weimin Ni, Baomin Feng, Tianfu Han, Megan G. Petrasek, and Hong Ma. "Members of the <i>Arabidopsis</i> -SKP1-like gene family exhibit a variety of expression patterns and may play diverse roles in <i>Arabidopsis</i> ." <i>Plant physiology</i> 133, no. 1 (2003): 203-217.                                                                              |

| TomatoID         | DE in LsoB | NCBI Protein Name                                          | Gene ID  | Uniprot Description                                                                                                                                                                  | Putative Consequences for Infection                                                                                                 | Citation                                                                                                                                                                                                                                                                                                           |
|------------------|------------|------------------------------------------------------------|----------|--------------------------------------------------------------------------------------------------------------------------------------------------------------------------------------|-------------------------------------------------------------------------------------------------------------------------------------|--------------------------------------------------------------------------------------------------------------------------------------------------------------------------------------------------------------------------------------------------------------------------------------------------------------------|
| Solyc03g114960.3 | -1.22      | tip elongation aberrant protein 1 isoform X2               | tea1     | Acts as an end marker, directing the growth machinery to the cell poles; Involved in the regulation of microtubular organization, affecting the maintenance of a single central axis | Promoted cell elongation; Promoted microtubule development                                                                          | Mata, Juan, and Paul Nurse. "tea1 and the microtubular cytoskeleton are important for generating global spatial order within the fission yeast cell." Cell 89, no. 6 (1997): 939-949.                                                                                                                              |
| Solyc06g008870.2 | -1.26      | gibberellin receptor GID1b-2                               | GID1B    | Soluble gibberellin GA receptor; Regulates growth and development                                                                                                                    | Promoted growth/development                                                                                                         | Griffiths, Jayne, Kohji Murase, Ivo Rieu, Rodolfo Zentella, Zhong-Lin Zhang, Stephen J. Powers, Fan Gong et al. "Genetic characterization and functional analysis of the GID1 gibberellin receptors in Arabidopsis." The Plant Cell 18, no. 12 (2006): 3399-3414.                                                  |
| Solyc04g007980.3 | -1.47      | 1-aminocyclopropane-1-carboxylate oxidase homolog 4        | ACO4     | Involved in ethylene biosynthesis; Promotes stem elongation by maximizing the extensibility cells                                                                                    | Promoted ethylene biosynthesis; Promotes stem elongation and cell extensibility                                                     | Qin, Yong-Mei, Chun-Yang Hu, Yu Pang, Alexander J. Kastaniotis, J. Kalervo Hiltunen, and Yu-Xian Zhu. "Saturated very-long-chain fatty acids promote cotton fiber and Arabidopsis cell elongation by activating ethylene biosynthesis." The Plant Cell 19, no. 11 (2007): 3692-3704.                               |
| Solyc12g045020.2 | -1.57      | cytochrome P450 CYP736A12                                  | CYP734A1 | Cytochrome P450 involved in brassinosteroids inactivation and regulation of BRs homeostasis                                                                                          | <i>Promoted brassinosteroid inactivation;</i><br><i>Promoted brassinosteroid homeostasis;</i><br><i>Impaired growth/development</i> | Neff, Michael M., Serena M. Nguyen, Elizabeth J. Malancharuvil, Shozo Fujioka, Takahiro Noguchi, Hideharu Seto, Masayoshi Tsubuki et al. "BAS1: A gene regulating brassinosteroid levels and light responsiveness in Arabidopsis." Proceedings of the National Academy of Sciences 96, no. 26 (1999): 15316-15323. |
| Solyc08g078870.2 | -1.49      | 14 kDa proline-rich protein DC2.15-like                    | N/A      | Involved in the initiation of embryogenesis and the metabolic changes related to the removal of auxins                                                                               | Promoted embryogenesis; Promoted auxin removal                                                                                      | Aleith, F., and G. Richter. "Gene expression during induction of somatic embryogenesis in carrot cell suspensions." Planta 183, no. 1 (1991): 17-24.                                                                                                                                                               |
| Solyc04g007000.1 | -1.69      | AP2/ERF and B3 domain-containing transcription factor RAV1 | RAV1     | Negative regulator of plant growth and development                                                                                                                                   | <i>Impaired growth and development</i>                                                                                              | Feng, C.Z., Chen, Y., Wang, C., Kong, Y.H., Wu, W.H. and Chen, Y.F., 2014. Arabidopsis RAV 1 transcription factor, phosphorylated by SnRK2 kinases, regulates the expression of ABI 3, ABI 4, and ABI 5 during seed germination and early seedling development. The Plant Journal, 80(4), pp.654-668.              |
| Solyc02g068470.1 | -1.75      | VQ motif-containing protein 22                             | VQ22     | Functions as a positive regulator of plant growth                                                                                                                                    | Promoted plant growth                                                                                                               | Cheng, Yuan, Yuan Zhou, Yan Yang, Ying-Jun Chi, Jie Zhou, Jian-Ye Chen, Fei Wang et al. "Structural and functional analysis of VQ motif-containing proteins in Arabidopsis as interacting proteins of WRKY transcription factors." Plant physiology 159, no. 2 (2012): 810-825.                                    |
| Solyc03g114890.3 | -1.84      | COBRA-like protein 4 isoform X2                            | COBL4    | Involved in cellulose microfibril organization; Involved in plant cell wall cellulose biosynthesis; Involved in secondary cell wall biogenesis                                       | Promoted plant cell wall cellulose biosynthesis; Promoted secondary cell wall biogenesis; Promoted growth/development               | Brown, David M., Leo AH Zeef, Joanne Ellis, Royston Goodacre, and Simon R. Turner. "Identification of novel genes in Arabidopsis involved in secondary cell wall formation using expression profiling and reverse genetics." The Plant Cell 17, no. 8 (2005): 2281-2295.                                           |

| TomatoID         | DE in LsoB | NCBI Protein Name                                   | Gene ID   | Uniprot Description                                                                                                                                                                  | Putative Consequences for Infection                                                                                      | Citation                                                                                                                                                                                                                                                                                                                                                                                                                                                   |
|------------------|------------|-----------------------------------------------------|-----------|--------------------------------------------------------------------------------------------------------------------------------------------------------------------------------------|--------------------------------------------------------------------------------------------------------------------------|------------------------------------------------------------------------------------------------------------------------------------------------------------------------------------------------------------------------------------------------------------------------------------------------------------------------------------------------------------------------------------------------------------------------------------------------------------|
| Solyc04g040130.1 | -1.86      | delta(12)-fatty-acid desaturase FAD2-like           | FAD2      | Required for desaturation of fatty acids present in extraplastidial membranes, including mitochondria; Required for salt tolerance during seed germination and early seedling growth | Promoted salt tolerance during seed germination and early growth                                                         | Okuley, John, Jonathan Lightner, Kenneth Feldmann, Narendra Yadav, Ellen Lark, and John Browse. "Arabidopsis FAD2 gene encodes the enzyme that is essential for polyunsaturated lipid synthesis." The Plant Cell 6, no. 1 (1994): 147-158.                                                                                                                                                                                                                 |
| Solyc10g076550.1 | -1.90      | wall-associated receptor kinase 2-like              | WAK2      | Serine/threonine-protein kinase that functions as a signaling receptor of extracellular matrix component; Involved in the control of cell expansion, morphogenesis, and development  | Promoted signaling turnover; Promoted cell expansion, morphogenesis, and development                                     | Wagner, Tanya A., and Bruce D. Kohorn. "Wall-associated kinases are expressed throughout plant development and are required for cell expansion." The Plant Cell 13, no. 2 (2001): 303-318.                                                                                                                                                                                                                                                                 |
| Solyc12g096570.1 | -2.52      | protein AUXIN-REGULATED GENE INVOLVED IN ORGAN SIZE | ARGOS     | Promotes cell proliferation-dependent organ growth; Takes part in the AXR1-dependent auxin signaling pathway that requires ANT during organogenesis                                  | Promoted organ growth; Promoted auxin signaling                                                                          | Hu, Yuxin, Qi Xie, and Nam-Hai Chua. "The Arabidopsis auxin-inducible gene ARGOS controls lateral organ size." The Plant Cell 15, no. 9 (2003): 1951-1961.                                                                                                                                                                                                                                                                                                 |
| Solyc03g033840.3 | -2.57      | AAA-ATPase At3g50940-like                           | At3g50940 | Involved in lignin biosynthesis and response to salt stress                                                                                                                          | Promoted lignin biosynthesis; Promoted cell wall expansion; Promoted growth/development Promoted response to salt stress | van de Mortel, Judith E., Laia Almar Villanueva, Henk Schat, Jeroen Kwekkeboom, Sean Coughlan, Perry D. Moerland, Emiel Ver Loren van Themaat, Maarten Koornneef, and Mark GM Aarts. "Large expression differences in genes for iron and zinc homeostasis, stress response, and lignin biosynthesis distinguish roots of Arabidopsis thaliana and the related metal hyperaccumulator Thlaspi caerulescens." Plant physiology 142, no. 3 (2006): 1127-1147. |
| Solyc12g100250.2 | -2.78      | delta(12)-fatty-acid desaturase FAD2 isoform X1     | FAD2      | Required for desaturation of fatty acids present in extraplastidial membranes, including mitochondria; Required for salt tolerance during seed germination and early seedling growth | Promoted salt tolerance during seed germination and early growth                                                         | Okuley, John, Jonathan Lightner, Kenneth Feldmann, Narendra Yadav, Ellen Lark, and John Browse. "Arabidopsis FAD2 gene encodes the enzyme that is essential for polyunsaturated lipid synthesis." The Plant Cell 6, no. 1 (1994): 147-158.                                                                                                                                                                                                                 |
| Solyc12g100240.1 | -2.78      | delta(12)-fatty-acid desaturase FAD2-like           | FAD2      | Required for desaturation of fatty acids present in extraplastidial membranes, including mitochondria; Required for salt tolerance during seed germination and early seedling growth | Promoted salt tolerance during seed germination and early growth                                                         | Okuley, John, Jonathan Lightner, Kenneth Feldmann, Narendra Yadav, Ellen Lark, and John Browse. "Arabidopsis FAD2 gene encodes the enzyme that is essential for polyunsaturated lipid synthesis." The Plant Cell 6, no. 1 (1994): 147-158.                                                                                                                                                                                                                 |
| Solyc12g100260.1 | -3.19      | delta(12)-fatty-acid desaturase FAD2-like           | FAD2      | Required for desaturation of fatty acids present in extraplastidial membranes, including mitochondria; Required for salt tolerance during seed germination and early seedling growth | Promoted salt tolerance during seed germination and early growth                                                         | Okuley, John, Jonathan Lightner, Kenneth Feldmann, Narendra Yadav, Ellen Lark, and John Browse. "Arabidopsis FAD2 gene encodes the enzyme that is essential for polyunsaturated lipid synthesis." The Plant Cell 6, no. 1 (1994): 147-158.                                                                                                                                                                                                                 |
