# Supplementary material for: Effects of ‘Candidatus Liberibacter solanacearum’ haplotypes A and B on tomato gene expression and geotropism
Source: PubMed Central journal article supplement (PMC8966271; doi:10.1186/s12870-022-03505-z), 2022-03-30
Supplement: 12870_2022_3505_MOESM13_ESM.pdf [file 12870_2022_3505_MOESM13_ESM.pdf]

| TomatoID                | DE in LsoB | NCBI Protein Name                                  | Gene ID      | Uniprot Description                                                                                                                                                        | Putative Consequences for Infection                                                                      | Citation                                                                                                                                                                                                                                                                                                                                                                              |
|-------------------------|------------|----------------------------------------------------|--------------|----------------------------------------------------------------------------------------------------------------------------------------------------------------------------|----------------------------------------------------------------------------------------------------------|---------------------------------------------------------------------------------------------------------------------------------------------------------------------------------------------------------------------------------------------------------------------------------------------------------------------------------------------------------------------------------------|
| <i>Solyc09g089520.3</i> | 4.23       | proteinase inhibitor I-B-like                      | LOC107794480 | Involved in response to wounding                                                                                                                                           | <i>Impaired response to wounding</i>                                                                     | Sierro, Nicolas, et al. "The tobacco genome sequence and its comparison with those of tomato and potato." <i>Nature communications</i> 5.1 (2014): 1-9.                                                                                                                                                                                                                               |
| <i>Solyc11g071480.1</i> | 3.83       | agmatine hydroxycinnamoyltransferase 1-like        | AHT1         | Promotes the synthesis of hydroxycinnamic acid amides, which play a role in defense against pathogens                                                                      | <i>Impaired defense against pathogens</i>                                                                | Chen, Wei, et al. "Genome-wide association analyses provide genetic and biochemical insights into natural variation in rice metabolism." <i>Nature genetics</i> 46.7 (2014): 714-721.                                                                                                                                                                                                 |
| <i>Solyc12g010030.2</i> | 2.80       | leucine aminopeptidase 2, chloroplastic isoform X1 | LAP2         | Involved in the processing and regular turnover of intracellular proteins; Heat shock protein                                                                              | <i>Impaired turnover of intracellular proteins; Impaired response to heat-induced damaged</i>            | Waditee-Sirisattha, Rungaroon, et al. "The Arabidopsis aminopeptidase LAP2 regulates plant growth, leaf longevity and stress response." <i>New Phytologist</i> 191.4 (2011): 958-969.                                                                                                                                                                                                 |
| <i>Solyc06g009190.3</i> | 2.60       | pectinesterase                                     | PME1         | Acts in the modification of cell walls via demethylesterification of cell wall pectin; Acts as negative regulators of genes involved in salt stress response               | <i>Impaired cell wall modification; Impaired response to salt stress</i>                                 | Creighton, Maria T., Anna Kolton, Amr RA Kataya, Jodi Maple-Grødem, Irina O. Averkina, Behzad Heidari, and Cathrine Lillo. "Methylation of protein phosphatase 2A—Influence of regulators and environmental stress factors." <i>Plant, cell &amp; environment</i> 40, no. 10 (2017): 2347-2358.                                                                                       |
| <i>Solyc06g083130.3</i> | 2.55       | dCTP pyrophosphatase 1                             | DCTPP1       | Hydrolyzes dNTPs to the corresponding nucleoside monophosphates; Protects DNA/RNA against the incorporation of these genotoxic nucleotide analogs through their catabolism | <i>Impaired DNA/RNA protection against genotoxic nucleotide analogs</i>                                  | Cheng, Chia-Yi, et al. "Araport11: a complete reannotation of the Arabidopsis thaliana reference genome." <i>The Plant Journal</i> 89.4 (2017): 789-804.                                                                                                                                                                                                                              |
| <i>Solyc01g091170.3</i> | 2.54       | Arginase 2, chloroplastic/mitochondrial            | ARGAH2       | Utilized in the urea cycle; Precursor for the synthesis of both polyamines and proline; Catalyzes the formation of putrescine from agmatine                                | <i>Impaired jasmonate-related functions; Impaired urea waste management; Impaired freezing tolerance</i> | Dombrecht, Bruno, et al. "MYC2 differentially modulates diverse jasmonate-dependent functions in Arabidopsis." <i>The Plant Cell</i> 19.7 (2007): 2225-2245.                                                                                                                                                                                                                          |
| <i>Solyc06g083470.3</i> | 2.32       | tropinone reductase homolog At5g06060              | At5g06060    | Has oxidoreductase activity                                                                                                                                                | <i>Decreased oxidoreductase activity</i>                                                                 | Ciftci-Yilmaz, Sultan, Mustafa R. Morsy, Luhua Song, Alicia Coutu, Beth A. Krizek, Michael W. Lewis, Daniel Warren, John Cushman, Erin L. Connolly, and Ron Mittler. "The EAR motif of the Cys2/His2-type zinc finger protein Zat7 plays a key role in the defense response of Arabidopsis to salinity stress." <i>Journal of Biological Chemistry</i> 282, no. 12 (2007): 9260-9268. |
| <i>Solyc06g083480.3</i> | 2.32       | tropinone reductase homolog At5g06060              | At5g06060    | Has oxidoreductase activity                                                                                                                                                | <i>Decreased oxidoreductase activity</i>                                                                 | Ciftci-Yilmaz, Sultan, Mustafa R. Morsy, Luhua Song, Alicia Coutu, Beth A. Krizek, Michael W. Lewis, Daniel Warren, John Cushman, Erin L. Connolly, and Ron Mittler. "The EAR motif of the Cys2/His2-type zinc finger protein Zat7 plays a key role in the defense response of Arabidopsis to salinity stress." <i>Journal of Biological Chemistry</i> 282, no. 12 (2007): 9260-9268. |

| TomatoID                | DE in LsoB | NCBI Protein Name                                              | Gene ID   | Uniprot Description                                                                                                                                                             | Putative Consequences for Infection                                                                                       | Citation                                                                                                                                                                                                                                                                                                                     |
|-------------------------|------------|----------------------------------------------------------------|-----------|---------------------------------------------------------------------------------------------------------------------------------------------------------------------------------|---------------------------------------------------------------------------------------------------------------------------|------------------------------------------------------------------------------------------------------------------------------------------------------------------------------------------------------------------------------------------------------------------------------------------------------------------------------|
| <i>Solyc01g005300.3</i> | 2.25       | adagio protein 3                                               | ADO3      | Component of an E3 ubiquitin ligase complex that plays a central role in blue light-dependent circadian cycles                                                                  | <i>Impaired E3 ubiquitination; Accumulation of misfolded proteins</i>                                                     | Fornara, Fabio, Kishore CS Panigrahi, Lionel Gissot, Nicolas Sauerbrunn, Mark Rühl, José A. Jarillo, and George Coupland. "Arabidopsis DOF transcription factors act redundantly to reduce CONSTANS expression and are essential for a photoperiodic flowering response." <i>Developmental cell</i> 17, no. 1 (2009): 75-86. |
| <i>Solyc11g066390.2</i> | 2.23       | superoxide dismutase [Cu-Zn], chloroplastic                    | CSD2      | Processes reactive oxygen species which are normally produced within the cells; Mediates tolerance to stress, including photo-oxidative stress                                  | <i>Impaired photo-oxidative stress response</i>                                                                           | Abarca, Dolores, Marta Roldán, Mercedes Martín, and Bartolomé Sabater. "Arabidopsis thaliana ecotype Cvi shows an increased tolerance to photo-oxidative stress and contains a new chloroplastic copper/zinc superoxide dismutase isoenzyme." <i>Journal of experimental botany</i> 52, no. 360 (2001): 1417-1425.           |
| <i>Solyc07g008410.3</i> | 2.01       | protein DETOXIFICATION 29-like                                 | DTX29     | Xenobiotic transmembrane transporter activity                                                                                                                                   | <i>Impaired detoxification</i>                                                                                            | Hanada, Kousuke, et al. "Functional compensation of primary and secondary metabolites by duplicate genes in Arabidopsis thaliana." <i>Molecular biology and evolution</i> 28.1 (2011): 377-382.                                                                                                                              |
| <i>Solyc04g063210.3</i> | 1.88       | probable caffeoyl-CoA O-methyltransferase At4g26220 isoform X2 | AT4G26220 | Plays a role in the synthesis of feruloylated polysaccharides; Involved in the reinforcement of the plant cell wall; Involved in response to wounding and/or pathogen challenge | <i>Impaired reinforcement of plant cell walls; Impaired response to wounding and/or pathogen challenge</i>                | Meyermans, Hugo, et al. "Modifications in lignin and accumulation of phenolic glucosides in poplar xylem upon down-regulation of caffeoyl-coenzyme A O-methyltransferase, an enzyme involved in lignin biosynthesis." <i>Journal of Biological Chemistry</i> 275.47 (2000): 36899-36909.                                     |
| <i>Solyc04g081890.1</i> | 1.75       | E3 ubiquitin-protein ligase ATL23                              | ATL23     | E3 ubiquitin-protein ligase able to catalyze polyubiquitination with ubiquitin-conjugating enzymes                                                                              | <i>Impaired E3 ubiquitination; Accumulation of misfolded proteins</i>                                                     | Kraft, E., Stone, S.L., Ma, L., Su, N., Gao, Y., Lau, O.S., Deng, X.W. and Callis, J., 2005. Genome analysis and functional characterization of the E2 and RING-type E3 ligase ubiquitination enzymes of Arabidopsis. <i>Plant physiology</i> , 139(4), pp.1597-1611.                                                        |
| <i>Solyc01g096450.3</i> | 1.71       | aspartyl protease AED3                                         | AED3      | Involved in regulation of programmed cell death; Involved in systemic acquired resistance                                                                                       | <i>Impaired programmed cell death; Impaired systemic acquired resistance</i>                                              | Dinneny, Jose R., Terri A. Long, Jean Y. Wang, Jee W. Jung, Daniel Mace, Solomon Pointer, Christa Barron, Siobhan M. Brady, John Schiefelbein, and Philip N. Benfey. "Cell identity mediates the response of Arabidopsis roots to abiotic stress." <i>Science</i> 320, no. 5878 (2008): 942-945.                             |
| <i>Solyc04g078520.3</i> | 1.64       | protein RICE SALT SENSITIVE 3-like                             | RSS3      | Represses jasmonate-induced genes; Involved in transcriptional regulation in the root tip; Regulates root cell elongation during salt stress                                    | <i>Impaired repression of jasmonate-induced genes; Increased jasmonate-related defense; Impaired root cell elongation</i> | Toda, Yosuke, Maiko Tanaka, Daisuke Ogawa, Kyo Kurata, Ken-ichi Kurotani, Yoshiki Habu, Tsuyu Ando et al. "RICE SALT SENSITIVE3 forms a ternary complex with JAZ and class-C bHLH factors and regulates jasmonate-induced gene expression and root cell elongation." <i>The Plant Cell</i> 25, no. 5 (2013): 1709-1725.      |
| <i>Solyc12g005020.2</i> | 1.60       | NEP1-interacting protein-like 1 isoform X1                     | ATL27     | Involved in the early steps of the plant defense signaling pathway                                                                                                              | <i>Impaired plant defense</i>                                                                                             | Libault, Marc, Jinrong Wan, Tomasz Czechowski, Michael Udvardi, and Gary Stacey. "Identification of 118 Arabidopsis transcription factor and 30 ubiquitin-ligase genes responding to chitin, a plant-defense elicitor." <i>Molecular plant-microbe interactions</i> 20, no. 8 (2007): 900-911.                               |

| TomatoID                | DE in LsoB | NCBI Protein Name                                        | Gene ID   | Uniprot Description                                                                                                                                           | Putative Consequences for Infection                                                                                    | Citation                                                                                                                                                                                                                                                                                                                                    |
|-------------------------|------------|----------------------------------------------------------|-----------|---------------------------------------------------------------------------------------------------------------------------------------------------------------|------------------------------------------------------------------------------------------------------------------------|---------------------------------------------------------------------------------------------------------------------------------------------------------------------------------------------------------------------------------------------------------------------------------------------------------------------------------------------|
| <i>Solyc03g117560.3</i> | 1.59       | lamin-like protein                                       | At5g15350 | Has electron transfer activity; Involved in early response to salicylic acid                                                                                  | <i>Impaired salicylic acid-induced defense</i>                                                                         | Krinke, Ondrej, Eric Ruelland, Olga Valentová, Chantal Vergnolle, Jean-Pierre Renou, Ludvine Tacconat, Matyás Flemer, Lenka Burketová, and Alain Zachowski. "Phosphatidylinositol 4-kinase activation is an early response to salicylic acid in Arabidopsis suspension cells." <i>Plant Physiology</i> 144, no. 3 (2007): 1347-1359.        |
| <i>Solyc08g007240.3</i> | 1.53       | nudix hydrolase 8 isoform X2                             | NUDT8     | Mediates the hydrolysis of some nucleoside diphosphate derivatives; Positive regulator of defense response through salicylic acid signaling                   | <i>Impaired salicylic acid-induced defense</i>                                                                         | Fonseca, Jose Pedro, and Xinnian Dong. "Functional characterization of a Nudix hydrolase AtNUDX8 upon pathogen attack indicates a positive role in plant immune responses." <i>PLoS one</i> 9, no. 12 (2014): e114119.                                                                                                                      |
| <i>Solyc06g065820.3</i> | 1.51       | ethylene response factor H.1                             | ERF1A     | Acts as a transcriptional activator; Involved in the regulation of gene expression by stress factors and by components of stress signal transduction pathways | <i>Impaired stress response</i>                                                                                        | Fujimoto, Susan Y., Masaru Ohta, Akemi Usui, Hideaki Shinshi, and Masaru Ohme-Takagi. "Arabidopsis ethylene-responsive element binding factors act as transcriptional activators or repressors of GCC box-mediated gene expression." <i>The Plant Cell</i> 12, no. 3 (2000): 393-404.                                                       |
| <i>Solyc08g042100.3</i> | 1.50       | U-box domain-containing protein 3-like                   | PUB3      | Functions as an E3 ubiquitin ligase                                                                                                                           | <i>Impaired E3 ubiquitination; Accumulation of misfolded proteins</i>                                                  | Benschop, Joris J., Shabaz Mohammed, Martina O'Flaherty, Albert JR Heck, Monique Slijper, and Frank LH Menke. "Quantitative phosphoproteomics of early elicitor signaling in Arabidopsis." <i>Molecular &amp; Cellular Proteomics</i> 6, no. 7 (2007): 1198-1214.                                                                           |
| <i>Solyc04g008850.1</i> | 1.42       | protein ASPARTIC PROTEASE IN GUARD CELL 2-like           | ASPG2     | Aspartic protease involved in drought avoidance through abscisic acid signaling                                                                               | <i>Impaired drought response; Impaired abscisic acid signaling</i>                                                     | Yao, Xuan, Wei Xiong, Tiantian Ye, and Yan Wu. "Overexpression of the aspartic protease ASPG1 gene confers drought avoidance in Arabidopsis." <i>Journal of experimental botany</i> 63, no. 7 (2012): 2579-2593.                                                                                                                            |
| <i>Solyc02g090960.1</i> | 1.36       | protein RALF-like 34                                     | RALFL34   | Cell signaling peptide that regulates plant stress, growth, and development                                                                                   | <i>Impaired response to plant stress, growth, and development</i>                                                      | Murphy, Evan, Lam Dai Vu, Lisa Van den Broeck, Zhefeng Lin, Priya Ramakrishna, Brigitte Van De Cotte, Allison Gaudinier et al. "RALFL34 regulates formative cell divisions in Arabidopsis pericycle during lateral root initiation." <i>Journal of Experimental Botany</i> 67, no. 16 (2016): 4863-4875.                                    |
| <i>Solyc06g062960.2</i> | 1.35       | protein RALF-like 34                                     | RALFL34   | Cell signaling peptide that may regulate plant stress, growth, and development                                                                                | <i>Impaired response to plant stress, growth, and development</i>                                                      | Murphy, Evan, Lam Dai Vu, Lisa Van den Broeck, Zhefeng Lin, Priya Ramakrishna, Brigitte Van De Cotte, Allison Gaudinier et al. "RALFL34 regulates formative cell divisions in Arabidopsis pericycle during lateral root initiation." <i>Journal of Experimental Botany</i> 67, no. 16 (2016): 4863-4875.                                    |
| <i>Solyc09g009010.3</i> | 1.35       | glucomannan 4-beta-mannosyltransferase 9-like isoform X2 | CSLA9     | Required for lateral root development; Involved in cell wall organization; Involved in response to bacteria                                                   | <i>Impaired lateral root development; Impaired plant cell wall organization; Impaired defense response to bacteria</i> | Liepmann, Aaron H., C. Joseph Nairn, William GT Willats, Iben Sørensen, Alison W. Roberts, and Kenneth Keegstra. "Functional genomic analysis supports conservation of function among cellulose synthase-like a gene family members and suggests diverse roles of mannans in plants." <i>Plant Physiology</i> 143, no. 4 (2007): 1881-1893. |

| TomatoID                | DE in LsoB | NCBI Protein Name                                        | Gene ID   | Uniprot Description                                                                                                                                                                                                                                     | Putative Consequences for Infection                                                                                    | Citation                                                                                                                                                                                                                                                                                                                                                                    |
|-------------------------|------------|----------------------------------------------------------|-----------|---------------------------------------------------------------------------------------------------------------------------------------------------------------------------------------------------------------------------------------------------------|------------------------------------------------------------------------------------------------------------------------|-----------------------------------------------------------------------------------------------------------------------------------------------------------------------------------------------------------------------------------------------------------------------------------------------------------------------------------------------------------------------------|
| <i>Solyc09g008990.3</i> | 1.35       | glucomannan 4-beta-mannosyltransferase 9-like isoform X2 | CSLA9     | Required for lateral root development; Involved in cell wall organization; Involved in response to bacteria                                                                                                                                             | <i>Impaired lateral root development; Impaired plant cell wall organization; Impaired defense response to bacteria</i> | Liepman, Aaron H., C. Joseph Nairn, William GT Willats, Iben Sørensen, Alison W. Roberts, and Kenneth Keegstra. "Functional genomic analysis supports conservation of function among cellulose synthase-like a gene family members and suggests diverse roles of mannans in plants." <i>Plant Physiology</i> 143, no. 4 (2007): 1881-1893.                                  |
| <i>Solyc12g089330.2</i> | 1.30       | synaptotagmin-1                                          | SYT1      | Maintains plasma membrane integrity during freezing and osmotic stresses; Functions in membrane resealing during calcium-dependent freezing tolerance; Regulates endocytosis and endosome recycling at the plasma membrane and cell-to-cell trafficking | <i>Impaired freezing response; Impaired cell-to-cell trafficking</i>                                                   | Yamazaki, Tomokazu, Naoki Takata, Matsuo Uemura, and Yukio Kawamura. "Arabidopsis synaptotagmin SYT1, a type I signal-anchor protein, requires tandem C2 domains for delivery to the plasma membrane." <i>Journal of Biological Chemistry</i> 285, no. 30 (2010): 23165-23176.                                                                                              |
| <i>Solyc08g082250.3</i> | 1.29       | endo-beta-1,4-D-glucanase precursor                      | At3g13560 | Involved in carbohydrate metabolism; Involved in defense response                                                                                                                                                                                       | <i>Impaired carbohydrate metabolism; Impaired defense response</i>                                                     | Jakoby, Marc J., Doris Falkenhan, Michael T. Mader, Ginger Brininstool, Elisabeth Wischnitzki, Nicole Platz, Andrew Hudson, Martin Hulskamp, John Larkin, and Arp Schnittger. "Transcriptional profiling of mature Arabidopsis trichomes reveals that NOECK encodes the MIXTA-like transcriptional regulator MYB106." <i>Plant Physiology</i> 148, no. 3 (2008): 1583-1602. |
| <i>Solyc02g065170.3</i> | 1.27       | L-ascorbate oxidase homolog                              | AAO       | Represses responses to high salinity and oxidative stress conditions such as vegetative growth and seed production reductions                                                                                                                           | <i>Impaired regulation of stress responses; Impaired growth/development under stress</i>                               | Yamamoto, Atsuko, Md Nazmul H. Bhuiyan, Rungaroon Waditee, Yoshito Tanaka, Muneharu Esaka, Kazuko Oba, André T. Jagendorf, and Teruhiro Takabe. "Suppressed expression of the apoplastic ascorbate oxidase gene increases salt tolerance in tobacco and Arabidopsis plants." <i>Journal of Experimental Botany</i> 56, no. 417 (2005): 1785-1796.                           |
| <i>Solyc02g087190.1</i> | 1.22       | peroxidase 63                                            | PER63     | Involved in oxidation of toxic reductants, lignin metabolism, suberization, auxin catabolism; Involved in response to environmental stresses                                                                                                            | <i>Impaired plant defense; Impaired lignin metabolism; Impaired auxin catabolism</i>                                   | Valério, Luisa, Mireille De Meyer, Claude Penel, and Christophe Dunand. "Expression analysis of the Arabidopsis peroxidase multigenic family." <i>Phytochemistry</i> 65, no. 10 (2004): 1331-1342.                                                                                                                                                                          |
| <i>Solyc09g014490.3</i> | 1.22       | endochitinase A                                          | At2g43590 | Involved in plant cell wall macromolecule catabolism and chitin catabolism; Involved in defense response                                                                                                                                                | <i>Impaired plant cell wall development; Impaired defense response</i>                                                 | Krysan, Patrick J., Peter J. Jester, Jennifer R. Gottwald, and Michael R. Sussman. "An Arabidopsis mitogen-activated protein kinase kinase kinase gene family encodes essential positive regulators of cytokinesis." <i>The Plant Cell</i> 14, no. 5 (2002): 1109-1120.                                                                                                     |
| <i>Solyc12g009110.2</i> | 1.20       | acetylserotonin O-methyltransferase                      | ASMT      | Methyltransferase which catalyzes the production of melatonin; Involved in response to light stress                                                                                                                                                     | <i>Impaired development under light stress</i>                                                                         | Shi, Haitao, Yunxie Wei, and Chaozu He. "Melatonin-induced CBF/DREB1s are essential for diurnal change of disease resistance and CCA1 expression in Arabidopsis." <i>Plant Physiology and Biochemistry</i> 100 (2016): 150-155.                                                                                                                                             |

| TomatoID         | DE in LsoB | NCBI Protein Name                        | Gene ID | Uniprot Description                                                                                                                                                                                                                      | Putative Consequences for Infection                                                                                                                             | Citation                                                                                                                                                                                                                                                                                                                                                                       |
|------------------|------------|------------------------------------------|---------|------------------------------------------------------------------------------------------------------------------------------------------------------------------------------------------------------------------------------------------|-----------------------------------------------------------------------------------------------------------------------------------------------------------------|--------------------------------------------------------------------------------------------------------------------------------------------------------------------------------------------------------------------------------------------------------------------------------------------------------------------------------------------------------------------------------|
| Solyc11g051170.2 | 1.02       | ATP synthase CF1 alpha subunit           | atpA    | Produces ATP from ADP in the presence of a proton gradient across the membrane; Necessary for defense response to bacteria and cold                                                                                                      | <i>Impaired defense against pathogens; Impaired cold tolerance</i>                                                                                              | Kubis, Sybille, Ramesh Patel, Jonathan Combe, Jocelyn Beédard, Sabina Kovacheva, Kathryn Lilley, Alexander Biehl et al. "Functional specialization amongst the Arabidopsis Toc159 family of chloroplast protein import receptors." <i>The Plant Cell</i> 16, no. 8 (2004): 2059-2077.                                                                                          |
| Solyc05g007900.2 | -1.01      | E3 ubiquitin-protein ligase MPSR1        | MPSR1   | E3 ubiquitin-protein ligase involved in protein quality control under proteotoxic stress                                                                                                                                                 | Increased E3 ubiquitination during proteotoxic stress                                                                                                           | Kim, Jong Hum, Seok Keun Cho, Tae Rin Oh, Moon Young Ryu, Seong Wook Yang, and Woo Taek Kim. "MPSR1 is a cytoplasmic PQC E3 ligase for eliminating emergent misfolded proteins in Arabidopsis thaliana." <i>Proceedings of the National Academy of Sciences</i> 114, no. 46 (2017): E10009-E10017.                                                                             |
| Solyc05g052050.1 | -1.10      | DNA-binding protein Pti4                 | Pti4    | Transcription factor involved in defense                                                                                                                                                                                                 | Promoted defense                                                                                                                                                | Gu, Yong-Qiang, Mary C. Wildermuth, Suma Chakravarthy, Ying-Tsu Loh, Cai mei Yang, Xiaohua He, Yu Han, and Gregory B. Martin. "Tomato transcription factors Pti4, Pti5, and Pti6 activate defense responses when expressed in Arabidopsis." <i>The Plant Cell</i> 14, no. 4 (2002): 817-831.                                                                                   |
| Solyc02g084950.3 | -1.11      | jasmonate O-methyltransferase isoform X2 | JMT     | Catalyzes the methylation of jasmonate into methyljasmonate, a plant volatile that acts as an important cellular regulator mediating diverse developmental processes and defense responses                                               | Promoted methyljasmonate-regulated signaling; Promoted defense                                                                                                  | Seo, Hak Soo, Jong Tae Song, Jong-Joo Cheong, Yong-Hwan Lee, Yin-Won Lee, Ingyu Hwang, Jong Seob Lee, and Yang Do Choi. "Jasmonic acid carboxyl methyltransferase: a key enzyme for jasmonate-regulated plant responses." <i>Proceedings of the National Academy of Sciences</i> 98, no. 8 (2001): 4788-4793.                                                                  |
| Solyc11g066060.2 | -1.14      | heat shock cognate 70 kDa protein 2-like | HSP70-2 | Facilitate folding of de novo synthesized proteins, assist translocation of precursor proteins into organelles, and are responsible for degradation of damaged protein under stress conditions                                           | Promoted folding of de novo synthesized proteins; Promoted protein transport; Promoted degradation of damaged proteins under stress                             | Hilson, Pierre, Joke Allemeersch, Thomas Altmann, Sébastien Aubourg, Alexandra Avon, Jim Beynon, Rishikesh P. Bhalerao et al. "Versatile gene-specific sequence tags for Arabidopsis functional genomics: transcript profiling and reverse genetics applications." <i>Genome research</i> 14, no. 10b (2004): 2176-2189.                                                       |
| Solyc01g111640.3 | -1.14      | SKP1-like protein 1A                     | SKP1A   | Involved in ubiquitination; Required for vegetative and floral organ development and for male gametogenesis; Involved in auxin signaling pathway; Regulates responses to jasmonates; Involved in light-signaling and the circadian clock | Promoted protein ubiquitination; Promoted floral development and male gametogenesis; Promoted auxin signaling; Promoted circadian clock; Promoted embryogenesis | Zhao, Dazhong, Weimin Ni, Baomin Feng, Tianfu Han, Megan G. Petrasek, and Hong Ma. "Members of the Arabidopsis-SKP1-like gene family exhibit a variety of expression patterns and may play diverse roles in Arabidopsis." <i>Plant physiology</i> 133, no. 1 (2003): 203-217.                                                                                                  |
| Solyc12g009560.2 | -1.18      | EIN3-binding F-box protein 1             | EBF1    | Component of ubiquitin ligase complexes, which mediate the ubiquitination and subsequent proteasomal degradation of target proteins; Regulates ethylene signaling cascade                                                                | Promoted protein ubiquitination                                                                                                                                 | Gagne, Jennifer M., Jan Smalle, Derek J. Gingerich, Joseph M. Walker, Sang-Dong Yoo, Shuichi Yanagisawa, and Richard D. Vierstra. "Arabidopsis EIN3-binding F-box 1 and 2 form ubiquitin-protein ligases that repress ethylene action and promote growth by directing EIN3 degradation." <i>Proceedings of the National Academy of Sciences</i> 101, no. 17 (2004): 6803-6808. |

| TomatoID         | DE in LsoB | NCBI Protein Name                                 | Gene ID      | Uniprot Description                                                                                                                                                                                   | Putative Consequences for Infection                                                                                                                                                                 | Citation                                                                                                                                                                                                                                                                                                                                                           |
|------------------|------------|---------------------------------------------------|--------------|-------------------------------------------------------------------------------------------------------------------------------------------------------------------------------------------------------|-----------------------------------------------------------------------------------------------------------------------------------------------------------------------------------------------------|--------------------------------------------------------------------------------------------------------------------------------------------------------------------------------------------------------------------------------------------------------------------------------------------------------------------------------------------------------------------|
| Solyc10g051230.1 | -1.19      | receptor-like protein Cf-9                        | CF-9         | Involved in plant defense against fungal pathogens                                                                                                                                                    | Promoted defense against fungi                                                                                                                                                                      | Jones, David A., Colwyn M. Thomas, Kim E. Hammond-Kosack, Peter J. Balint-Kurti, and J. D. Jones. "Isolation of the tomato Cf-9 gene for resistance to <i>Cladosporium fulvum</i> by transposon tagging." <i>Science</i> 266, no. 5186 (1994): 789-793.                                                                                                            |
| Solyc01g105620.3 | -1.30      | RING-H2 finger protein ATL54-like                 | LOC109001200 | This protein is involved in the pathway protein ubiquitination, which is part of Protein modification                                                                                                 | Promoted protein ubiquitination                                                                                                                                                                     | Martínez-García, Pedro J., Marc W. Crepeau, Daniela Puiu, Daniel González-Ibeas, Jeanne Whalen, Kristian A. Stevens, Robin Paul et al. "The walnut ( <i>Juglans regia</i> ) genome sequence reveals diversity in genes coding for the biosynthesis of non-structural polyphenols." <i>The Plant Journal</i> 87, no. 5 (2016): 507-532.                             |
| Solyc12g096610.2 | -1.32      | poly(ADP-ribose) glycohydrolase 1-like isoform X3 | PARG1        | Involved in establishing period length of the circadian oscillator; Involved in defense against fungus; Involved in response to osmotic and water stress                                              | Promoted circadian clock; Promoted defense against fungi; Promoted drought tolerance; Increased defense against osmotic stress                                                                      | Panda, Satchidananda, Guy G. Poirier, and Steve A. Kay. "tej defines a role for poly (ADP-ribosyl) ation in establishing period length of the <i>Arabidopsis</i> circadian oscillator." <i>Developmental cell</i> 3, no. 1 (2002): 51-61.                                                                                                                          |
| Solyc11g008530.2 | -1.33      | endoribonuclease Dicer 2d isoform X1              | AT3G03300    | Plays an essential role in transitive silencing of transgenes by processing secondary siRNAs; Plays a role in antiviral RNA silencing                                                                 | Promoted post-transcriptional gene silencing; Promoted defense against viral pathogens                                                                                                              | "DICER-LIKE2 plays a primary role in transitive silencing of transgenes in <i>Arabidopsis</i> ."                                                                                                                                                                                                                                                                   |
| Solyc12g096600.2 | -1.34      | poly(ADP-ribose) glycohydrolase 1-like isoform X4 | PARG1        | Involved in establishing period length of the circadian oscillator; Involved in deefense against fungus; Involved in response to osmotic and water stress                                             | Promoted circadian clock; Promoted defense against fungi; Promoted drought tolerance; Increased defense against osmotic stress                                                                      | Panda, Satchidananda, Guy G. Poirier, and Steve A. Kay. "tej defines a role for poly (ADP-ribosyl) ation in establishing period length of the <i>Arabidopsis</i> circadian oscillator." <i>Developmental cell</i> 3, no. 1 (2002): 51-61.                                                                                                                          |
| Solyc11g010380.2 | -1.41      | protein DETOXIFICATION 27                         | DTX27        | Has xenobiotic transmembrane transporter activity                                                                                                                                                     | Promoted xenobiotic transport                                                                                                                                                                       | Ascencio-Ibáñez, José Trinidad, Rosangela Sozzani, Tae-Jin Lee, Tzu-Ming Chu, Russell D. Wolfinger, Rino Cella, and Linda Hanley-Bowdoin. "Global analysis of <i>Arabidopsis</i> gene expression uncovers a complex array of changes impacting pathogen response and cell cycle during geminivirus infection." <i>Plant physiology</i> 148, no. 1 (2008): 436-454. |
| Solyc08g067610.3 | -1.45      | pleiotropic drug resistance protein 1-like        | PDR1         | Excretes secondary metabolites such as terpenes; Involved in both constitutive and jasmonic acid-dependent induced defense                                                                            | Increased secondary metabolite excretion; Promoted jasmonic-acid depended induced defense; Promoted constitutive defense                                                                            | Jasiński, Michal, Yvan Stukkens, Hervé Degand, Bénédicte Purnelle, Jacqueline Marchand-Brynaert, and Marc Boutry. "A plant plasma membrane ATP binding cassette-type transporter is involved in antifungal terpenoid secretion." <i>The Plant Cell</i> 13, no. 5 (2001): 1095-1107.                                                                                |
| Solyc04g071890.3 | -1.47      | peroxidase 12 precursor                           | PER12        | Involved in removal of H <sub>2</sub> O <sub>2</sub> , oxidation of toxic reductants, biosynthesis and degradation of lignin, suberization, auxin catabolism, and response to environmental stressors | Increased removal of H <sub>2</sub> O <sub>2</sub> , oxidation of toxic reductants, biosynthesis and degradation of lignin, suberization, auxin catabolism, and response to environmental stressors | Paynel, Florence, et al. "Temporal regulation of cell-wall pectin methyltransferase and peroxidase isoforms in cadmium-treated flax hypocotyl." <i>Annals of botany</i> 104.7 (2009): 1363-1372.                                                                                                                                                                   |

| TomatoID         | DE in LsoB | NCBI Protein Name                                        | Gene ID  | Uniprot Description                                                                                                                                                                                      | Putative Consequences for Infection                                                                                                                                       | Citation                                                                                                                                                                                                                                                                            |
|------------------|------------|----------------------------------------------------------|----------|----------------------------------------------------------------------------------------------------------------------------------------------------------------------------------------------------------|---------------------------------------------------------------------------------------------------------------------------------------------------------------------------|-------------------------------------------------------------------------------------------------------------------------------------------------------------------------------------------------------------------------------------------------------------------------------------|
| Solyc08g006470.3 | -1.49      | cytoplasmic 60S subunit biogenesis factor REI1 homolog 1 | REI1     | Involved in the dissociation and recycling of other late pre-60S factors before newly synthesized large ribosomal subunits enter translation; Required for leaf growth under cold temperature conditions | Promoted growth under cold stress                                                                                                                                         | Schmidt, Stefanie, Frederik Dethloff, Olga Beine-Golovchuk, and Joachim Kopka. "The REI1 and REI2 proteins of Arabidopsis thaliana are required for leaf growth in the cold." <i>Plant physiology</i> 163, no. 4 (2013): 1623-1639.                                                 |
| Solyc03g025450.3 | -1.55      | U-box domain-containing protein 32 isoform X2            | PUB32    | Functions as an E3 ubiquitin ligase                                                                                                                                                                      | Promoted E3 ubiquitination                                                                                                                                                | Benschop, Joris J., Shabaz Mohammed, Martina O'Flaherty, Albert JR Heck, Monique Slijper, and Frank LH Menke. "Quantitative phosphoproteomics of early elicitor signaling in Arabidopsis." <i>Molecular &amp; Cellular Proteomics</i> 6, no. 7 (2007): 1198-1214.                   |
| Solyc11g066100.2 | -1.56      | heat shock cognate 70 kDa protein                        | HSP70-1  | Facilitate folding of de novo synthesized proteins, assist translocation of precursor proteins into organelles, and are responsible for degradation of damaged protein under stress conditions           | Promoted folding of de novo synthesized proteins; Promoted protein transport; Promoted degradation of damaged proteins under stress                                       | Sung, Dong Yul, and Charles L. Guy. "Physiological and molecular assessment of altered expression of Hsc70-1 in Arabidopsis. Evidence for pleiotropic consequences." <i>Plant Physiology</i> 132, no. 2 (2003): 979-987.                                                            |
| Solyc09g089930.2 | -1.57      | ethylene responsive element binding protein              | EREBP1   | Involved in defense response; Involved in ethylene-activated signaling pathway                                                                                                                           | Increased defense response; Increased ethylene-responsive signaling                                                                                                       | Horvath, Diana M., Dorothy J. Huang, and Nam-Hai Chua. "Four classes of salicylate-induced tobacco genes." <i>Molecular plant-microbe interactions</i> 11.9 (1998): 895-905.                                                                                                        |
| Solyc04g040130.1 | -1.86      | delta(12)-fatty-acid desaturase FAD2-like                | FAD2     | Required for desaturation of fatty acids present in extraplastidial membranes, including mitochondria; Required for salt tolerance during seed germination and early seedling growth                     | Promoted salt tolerance during seed germination and early growth                                                                                                          | Okuley, John, Jonathan Lightner, Kenneth Feldmann, Narendra Yadav, Ellen Lark, and John Browse. "Arabidopsis FAD2 gene encodes the enzyme that is essential for polyunsaturated lipid synthesis." <i>The Plant Cell</i> 6, no. 1 (1994): 147-158.                                   |
| Solyc05g053610.2 | -2.22      | pleiotropic drug resistance protein 1-like               | PDR1     | Excretes secondary metabolites such as terpenes; Involved in both constitutive and jasmonic acid-dependent induced defense                                                                               | Increased secondary metabolite excretion; Promoted jasmonic-acid depended induced defense; Promoted constitutive defense                                                  | Jasiński, Michal, Yvan Stukkens, Hervé Degand, Bénédicte Purnelle, Jacqueline Marchand-Brynaert, and Marc Boutry. "A plant plasma membrane ATP binding cassette-type transporter is involved in antifungal terpenoid secretion." <i>The Plant Cell</i> 13, no. 5 (2001): 1095-1107. |
| Solyc09g007520.3 | -2.27      | peroxidase 21                                            | PER21    | Involved in removal of H2O2, oxidation of toxic reductants, biosynthesis and degradation of lignin, suberization, auxin catabolism, and response to environmental stressors                              | Increased removal of H2O2, oxidation of toxic reductants, biosynthesis and degradation of lignin, suberization, auxin catabolism, and response to environmental stressors | Mosher, Rebecca A., Wendy E. Durrant, Dong Wang, Junqi Song, and Xinnian Dong. "A comprehensive structure-function analysis of Arabidopsis SNI1 defines essential regions and transcriptional repressor activity." <i>The Plant Cell</i> 18, no. 7 (2006): 1750-1765.               |
| Solyc09g008760.1 | -2.39      | probable cytochrome P450 556A1                           | cyp516A1 | Involved in xenobiotic metabolic process                                                                                                                                                                 | Promoted xenobiotic metabolism                                                                                                                                            | Eichinger, L., J. A. Pachebat, G. Glöckner, M-A. Rajandream, R. Sucgang, M. Berriman, J. Song et al. "The genome of the social amoeba Dictyostelium discoideum." <i>Nature</i> 435, no. 7038 (2005): 43-57.                                                                         |

| TomatoID         | DE in LsoB | NCBI Protein Name                               | Gene ID   | Uniprot Description                                                                                                                                                                  | Putative Consequences for Infection                                       | Citation                                                                                                                                                                                                                                                                                                                                                                                                                                                                  |
|------------------|------------|-------------------------------------------------|-----------|--------------------------------------------------------------------------------------------------------------------------------------------------------------------------------------|---------------------------------------------------------------------------|---------------------------------------------------------------------------------------------------------------------------------------------------------------------------------------------------------------------------------------------------------------------------------------------------------------------------------------------------------------------------------------------------------------------------------------------------------------------------|
| Solyc03g095650.3 | -2.50      | MLO-like protein 5                              | MLO5      | Involved in modulation of pathogen defense and leaf cell death                                                                                                                       | Promoted defense against pathogens; Promoted leaf programmed cell death   | Moriyama, Etsuko N., Pooja K. Strope, Stephen O. Opiyo, Zhongying Chen, and Alan M. Jones. "Mining the Arabidopsis thaliana genome for highly-divergent seven transmembrane receptors." <i>Genome biology</i> 7, no. 10 (2006): 1-9.                                                                                                                                                                                                                                      |
| Solyc03g033840.3 | -2.57      | AAA-ATPase At3g50940-like                       | At3g50940 | Involved in lignin biosynthesis and response to salt stress                                                                                                                          | Promoted lignin biosynthesis; Promoted response to salt stress            | van de Mortel, Judith E., Laia Almar Villanueva, Henk Schat, Jeroen Kwekkeboom, Sean Coughlan, Perry D. Moerland, Emiel Ver Loren van Themaat, Maarten Koornneef, and Mark GM Aarts. "Large expression differences in genes for iron and zinc homeostasis, stress response, and lignin biosynthesis distinguish roots of Arabidopsis thaliana and the related metal hyperaccumulator <i>Thlaspi caerulescens</i> ." <i>Plant physiology</i> 142, no. 3 (2006): 1127-1147. |
| Solyc08g068870.3 | -2.63      | aspartate protease family protein precursor     | APF1      | Aspartyl protease; Necessary for fungal resistance                                                                                                                                   | Increased fungal resistance                                               | Li, Yurong, Mehdi Kabbage, Wende Liu, and Martin B. Dickman. "Aspartyl protease-mediated cleavage of BAG6 is necessary for autophagy and fungal resistance in plants." <i>The Plant Cell</i> 28, no. 1 (2016): 233-247.                                                                                                                                                                                                                                                   |
| Solyc12g100250.2 | -2.78      | delta(12)-fatty-acid desaturase FAD2 isoform X1 | FAD2      | Required for desaturation of fatty acids present in extraplastidial membranes, including mitochondria; Required for salt tolerance during seed germination and early seedling growth | Promoted salt tolerance during seed germination and early growth          | Okuley, John, Jonathan Lightner, Kenneth Feldmann, Narendra Yadav, Ellen Lark, and John Browse. "Arabidopsis FAD2 gene encodes the enzyme that is essential for polyunsaturated lipid synthesis." <i>The Plant Cell</i> 6, no. 1 (1994): 147-158.                                                                                                                                                                                                                         |
| Solyc12g100240.1 | -2.78      | delta(12)-fatty-acid desaturase FAD2-like       | FAD2      | Required for desaturation of fatty acids present in extraplastidial membranes, including mitochondria; Required for salt tolerance during seed germination and early seedling growth | Promoted salt tolerance during seed germination and early growth          | Okuley, John, Jonathan Lightner, Kenneth Feldmann, Narendra Yadav, Ellen Lark, and John Browse. "Arabidopsis FAD2 gene encodes the enzyme that is essential for polyunsaturated lipid synthesis." <i>The Plant Cell</i> 6, no. 1 (1994): 147-158.                                                                                                                                                                                                                         |
| Solyc12g100260.1 | -3.19      | delta(12)-fatty-acid desaturase FAD2-like       | FAD2      | Required for desaturation of fatty acids present in extraplastidial membranes, including mitochondria; Required for salt tolerance during seed germination and early seedling growth | Promoted salt tolerance during seed germination and early growth          | Okuley, John, Jonathan Lightner, Kenneth Feldmann, Narendra Yadav, Ellen Lark, and John Browse. "Arabidopsis FAD2 gene encodes the enzyme that is essential for polyunsaturated lipid synthesis." <i>The Plant Cell</i> 6, no. 1 (1994): 147-158.                                                                                                                                                                                                                         |
| Solyc09g091000.3 | -4.16      | pathogenesis-related protein STH-2              | STH-2     | Regulates protein serine/threonine phosphate activity; Involved in abscisic acid-activated signaling pathway; Involved in defense response to biotic stimulus                        | Promoted abscisic acid signaling; Promoted defense against biotic stimuli | Matton, Daniel P., Gary Prescott, Charles Bertrand, Anne Camirand, and Normand Brisson. "Identification of cis-acting elements involved in the regulation of the pathogenesis-related gene STH-2 in potato." <i>Plant molecular biology</i> 22, no. 2 (1993): 279-291.                                                                                                                                                                                                    |
