# Supplementary material for: Effects of ‘Candidatus Liberibacter solanacearum’ haplotypes A and B on tomato gene expression and geotropism
Source: PubMed Central journal article supplement (PMC8966271; doi:10.1186/s12870-022-03505-z), 2022-03-30
Supplement: 12870_2022_3505_MOESM15_ESM.pdf [file 12870_2022_3505_MOESM15_ESM.pdf]

| TomatoID                | DE in LsoB | NCBI Protein Name                                              | Gene ID   | Uniprot Description                                                                                                                                                             | Putative Consequences for Infection                                                                        | Citation                                                                                                                                                                                                                                                                                                                                                            |
|-------------------------|------------|----------------------------------------------------------------|-----------|---------------------------------------------------------------------------------------------------------------------------------------------------------------------------------|------------------------------------------------------------------------------------------------------------|---------------------------------------------------------------------------------------------------------------------------------------------------------------------------------------------------------------------------------------------------------------------------------------------------------------------------------------------------------------------|
| <i>Solyc03g120990.3</i> | 2.09       | NADP-dependent malic enzyme, chloroplastic                     | ME6       | Cecarboxylates malate shuttled from neighboring mesophyll cells; CO2 released is refixed by RuBisCo; Eliminates the photorespiratory loss of CO2 that occurs in most plants     | <i>Impaired photorespiratory efficiency of CO2 loss</i>                                                    | Cheng, Yuxiang, et al. "Expression, purification, and characterization of two NADP-malic enzymes of rice ( <i>Oryza sativa</i> L.) in <i>Escherichia coli</i> ." <i>Protein expression and purification</i> 45.1 (2006): 200-205.                                                                                                                                   |
| <i>Solyc12g039030.1</i> | 1.97       | photosystem II protein D1                                      | psbA      | Photosynthetic electron transporter in photosystem II                                                                                                                           | <i>Impaired photosynthesis</i>                                                                             | Tsunoyama, Yuichi, Yoko Ishizaki, Kazuya Morikawa, Maki Kobori, Yoichi Nakahira, Go Takeba, Yoshinori Toyoshima, and Takashi Shiina. "Blue light-induced transcription of plastid-encoded psbD gene is mediated by a nuclear-encoded transcription initiation factor, AtSig5." <i>Proceedings of the National Academy of Sciences</i> 101, no. 9 (2004): 3304-3309. |
| <i>Solyc05g016120.2</i> | 1.95       | photosystem II protein D1                                      | psbA      | Photosynthetic electron transporter in photosystem II                                                                                                                           | <i>Impaired photosynthesis</i>                                                                             | Tsunoyama, Yuichi, Yoko Ishizaki, Kazuya Morikawa, Maki Kobori, Yoichi Nakahira, Go Takeba, Yoshinori Toyoshima, and Takashi Shiina. "Blue light-induced transcription of plastid-encoded psbD gene is mediated by a nuclear-encoded transcription initiation factor, AtSig5." <i>Proceedings of the National Academy of Sciences</i> 101, no. 9 (2004): 3304-3309. |
| <i>Solyc01g048590.2</i> | 1.93       | photosystem II protein D1                                      | psbA      | Photosynthetic electron transporter in photosystem II                                                                                                                           | <i>Impaired photosynthesis</i>                                                                             | Tsunoyama, Yuichi, Yoko Ishizaki, Kazuya Morikawa, Maki Kobori, Yoichi Nakahira, Go Takeba, Yoshinori Toyoshima, and Takashi Shiina. "Blue light-induced transcription of plastid-encoded psbD gene is mediated by a nuclear-encoded transcription initiation factor, AtSig5." <i>Proceedings of the National Academy of Sciences</i> 101, no. 9 (2004): 3304-3309. |
| <i>Solyc09g008320.3</i> | 1.92       | probable xyloglucan endotransglucosylase/hydrolase protein 32  | XTH32     | Cleaves and religates xyloglucan polymers, an essential constituent of the primary cell wall, and thereby participates in cell wall construction of growing tissues             | <i>Impaired plant cell wall construction</i>                                                               | Bischoff, Volker, Sarah Jane Cookson, Shuang Wu, and Wolf-Rüdiger Scheible. "Thaxtomin A affects CESA-complex density, expression of cell wall genes, cell wall composition, and causes ectopic lignification in <i>Arabidopsis thaliana</i> seedlings." <i>Journal of experimental botany</i> 60, no. 3 (2009): 955-965.                                           |
| <i>Solyc05g005550.3</i> | 1.92       | polygalacturonase non-catalytic subunit AroGP2 precursor       | GP2       | Non-catalytic subunit of polygalacturonase involved in cell wall organization                                                                                                   | <i>Impaired plant cell wall organization</i>                                                               | N/A                                                                                                                                                                                                                                                                                                                                                                 |
| <i>Solyc04g063210.3</i> | 1.88       | probable caffeoyl-CoA O-methyltransferase At4g26220 isoform X2 | AT4G26220 | Plays a role in the synthesis of feruloylated polysaccharides; Involved in the reinforcement of the plant cell wall; Involved in response to wounding and/or pathogen challenge | <i>Impaired reinforcement of plant cell walls; Impaired response to wounding and/or pathogen challenge</i> | Meyermans, Hugo, et al. "Modifications in lignin and accumulation of phenolic glucosides in poplar xylem upon down-regulation of caffeoyl-coenzyme A O-methyltransferase, an enzyme involved in lignin biosynthesis." <i>Journal of Biological Chemistry</i> 275.47 (2000): 36899-36909.                                                                            |

| TomatoID                | DE in LsoB | NCBI Protein Name                                       | Gene ID   | Uniprot Description                                                                                                                                                                                   | Putative Consequences for Infection                                     | Citation                                                                                                                                                                                                                                                                                                                                                            |
|-------------------------|------------|---------------------------------------------------------|-----------|-------------------------------------------------------------------------------------------------------------------------------------------------------------------------------------------------------|-------------------------------------------------------------------------|---------------------------------------------------------------------------------------------------------------------------------------------------------------------------------------------------------------------------------------------------------------------------------------------------------------------------------------------------------------------|
| <i>Solyc11g056340.1</i> | 1.80       | photosystem II protein D1                               | psbA      | Photosynthetic electron transporter in photosystem II                                                                                                                                                 | <i>Impaired photosynthesis</i>                                          | Tsunoyama, Yuichi, Yoko Ishizaki, Kazuya Morikawa, Maki Kobori, Yoichi Nakahira, Go Takeba, Yoshinori Toyoshima, and Takashi Shiina. "Blue light-induced transcription of plastid-encoded psbD gene is mediated by a nuclear-encoded transcription initiation factor, AtSig5." <i>Proceedings of the National Academy of Sciences</i> 101, no. 9 (2004): 3304-3309. |
| <i>Solyc05g014000.3</i> | 1.73       | probable pectate lyase 5                                | At1g67750 | Part of the pathway pectin degradation, which is itself part of Glycan metabolism                                                                                                                     | <i>Impaired pectin degradation</i>                                      | Pischke, Melissa S., Edward L. Huttlin, Adrian D. Hegeman, and Michael R. Sussman. "A transcriptome-based characterization of habituation in plant tissue culture." <i>Plant Physiology</i> 140, no. 4 (2006): 1255-1278.                                                                                                                                           |
| <i>Solyc02g066970.1</i> | 1.72       | transcription factor PAR1                               | PAR1      | Negative regulator of a variety of shade avoidance syndrome responses, including seedling elongation and photosynthetic pigment accumulation; Transcriptional repressor of two auxin-responsive genes | <i>Impaired shade avoidance; Impaired repression of auxin signaling</i> | Roig-Villanova, Irma, Jordi Bou-Torrent, Anahit Galstyan, Lorenzo Carretero-Paulet, Sergi Portolés, Manuel Rodríguez-Concepción, and Jaime F. Martínez-García. "Interaction of shade avoidance and auxin responses: a role for two novel atypical bHLH proteins." <i>The EMBO journal</i> 26, no. 22 (2007): 4756-4767.                                             |
| <i>Solyc05g009470.3</i> | 1.70       | alpha-xylosidase 1                                      | XYL1      | Glycoside hydrolase releasing xylosyl residues from xyloglucan oligosaccharides; Essential for growth/development                                                                                     | <i>Impaired growth/development</i>                                      | Sampedro, Javier, et al. "Cloning and expression pattern of a gene encoding an $\alpha$ -xylosidase active against xyloglucan oligosaccharides from <i>Arabidopsis</i> ." <i>Plant Physiology</i> 126.2 (2001): 910-920.                                                                                                                                            |
| <i>Solyc09g007940.3</i> | 1.70       | adenosine kinase 2                                      | ADK2      | Essential to sustain methyl recycling                                                                                                                                                                 | <i>Impaired methyl recycling</i>                                        | Pereira, L. A. R., M. Todorova, X. Cai, C. A. Makaroff, R. J. N. Emery, and B. A. Moffatt. "Methyl recycling activities are co-ordinately regulated during plant development." <i>Journal of experimental botany</i> 58, no. 5 (2007): 1083-1098.                                                                                                                   |
| <i>Solyc04g081300.3</i> | 1.70       | endoglucanase 2                                         | At1g19940 | Involved in cellulose catabolism; Involved in cell wall organization                                                                                                                                  | <i>Impaired cellulose catabolism; Impaired cell wall organization</i>   | Brown, David M., Leo AH Zeef, Joanne Ellis, Royston Goodacre, and Simon R. Turner. "Identification of novel genes in <i>Arabidopsis</i> involved in secondary cell wall formation using expression profiling and reverse genetics." <i>The Plant Cell</i> 17, no. 8 (2005): 2281-2295.                                                                              |
| <i>Solyc03g096050.3</i> | 1.63       | probable 2-oxoglutarate-dependent dioxygenase At5g05600 | AT5G05600 | Involved in anthocyanin and protoanthocyanidin biosynthesis                                                                                                                                           | <i>Impaired anthocyanin and protoanthocyanidin biosynthesis</i>         | Wang, Yi, et al. "Transcriptome analyses show changes in gene expression to accompany pollen germination and tube growth in <i>Arabidopsis</i> ." <i>Plant physiology</i> 148.3 (2008): 1201-1211.                                                                                                                                                                  |
| <i>Solyc10g047430.1</i> | 1.61       | ribulose 1,5-bisphosphate carboxylase, partial          | RBCMT     | Methylates 'Lys-14' of the large subunit of RuBisCO                                                                                                                                                   | <i>Impaired RuBisCO activity</i>                                        | N/A                                                                                                                                                                                                                                                                                                                                                                 |

| TomatoID                | DE in LsoB | NCBI Protein Name                                                       | Gene ID   | Uniprot Description                                                                                                                                                 | Putative Consequences for Infection                                                  | Citation                                                                                                                                                                                                                                                                                                                                                                              |
|-------------------------|------------|-------------------------------------------------------------------------|-----------|---------------------------------------------------------------------------------------------------------------------------------------------------------------------|--------------------------------------------------------------------------------------|---------------------------------------------------------------------------------------------------------------------------------------------------------------------------------------------------------------------------------------------------------------------------------------------------------------------------------------------------------------------------------------|
| <i>Solyc02g080160.3</i> | 1.51       | probable xyloglucan endotransglucosylase/hydrolase protein 8 isoform X2 | XTH8      | Cleaves and religates xyloglucan polymers, an essential constituent of the primary cell wall, and thereby participates in cell wall construction of growing tissues | <i>Impaired plant cell wall growth/development</i>                                   | Bischoff, Volker, Sarah Jane Cookson, Shuang Wu, and Wolf-Rüdiger Scheible. "Thaxtomin A affects CESA-complex density, expression of cell wall genes, cell wall composition, and causes ectopic lignification in <i>Arabidopsis thaliana</i> seedlings." <i>Journal of experimental botany</i> 60, no. 3 (2009): 955-965.                                                             |
| <i>Solyc05g005560.4</i> | 1.41       | polygalacturonase-1 non-catalytic subunit beta precursor                | GP2       | Non-catalytic subunit of polygalacturonase involved in cell wall organization                                                                                       | <i>Impaired plant cell wall organization</i>                                         | N/A                                                                                                                                                                                                                                                                                                                                                                                   |
| <i>Solyc07g052980.3</i> | 1.39       | xyloglucan endotransglycosylase/hydrolase 16 precursor                  | XTH16     | Cleaves and religates xyloglucan polymers, an essential constituent of the primary cell wall, and thereby participates in cell wall construction of growing tissues | <i>Impaired plant cell wall expansion</i>                                            | Sasidharan, Rashmi, C. C. Chinnappa, Marten Staal, J. Theo M. Elzenga, Ryusuke Yokoyama, Kazuhiko Nishitani, Laurentius ACJ Voeseenek, and Ronald Pierik. "Light quality-mediated petiole elongation in <i>Arabidopsis</i> during shade avoidance involves cell wall modification by xyloglucan endotransglucosylase/hydrolases." <i>Plant physiology</i> 154, no. 2 (2010): 978-990. |
| <i>Solyc02g081060.3</i> | 1.32       | chaperonin-like RBCX protein 1, chloroplastic                           | RBCX1     | Chaperone involved in RuBisCO assembly process                                                                                                                      | <i>Impaired RuBisCO activity</i>                                                     | Kolesiński, Piotr, Janusz Piechota, and Andrzej Szczepaniak. "Initial characteristics of RbcX proteins from <i>Arabidopsis thaliana</i> ." <i>Plant molecular biology</i> 77, no. 4 (2011): 447-459.                                                                                                                                                                                  |
| <i>Solyc10g061830.2</i> | 1.32       | photosystem II 44 kDa protein                                           | psbC      | Photosynthetic electron transporter in photosystem II                                                                                                               | <i>Impaired photosynthesis</i>                                                       | Ahmed, Ibrar, Peter J. Matthews, Patrick J. Biggs, Muhammad Naeem, Patricia A. McLenachan, and Peter J. Lockhart. "Identification of chloroplast genome loci suitable for high-resolution phylogeographic studies of <i>C. olocasia esculenta</i> (L.) S. chott (A. raceae) and closely related taxa." <i>Molecular Ecology Resources</i> 13, no. 5 (2013): 929-937.                  |
| <i>Solyc08g082250.3</i> | 1.29       | endo-beta-1,4-D-glucanase precursor                                     | At3g13560 | Involved in carbohydrate metabolism; Involved in defense response                                                                                                   | <i>Impaired carbohydrate metabolism; Impaired defense response</i>                   | Jakoby, Marc J., Doris Falkenhan, Michael T. Mader, Ginger Brininstool, Elisabeth Wischnitzki, Nicole Platz, Andrew Hudson, Martin Hulskamp, John Larkin, and Arp Schnittger. "Transcriptional profiling of mature <i>Arabidopsis</i> trichomes reveals that NOECK encodes the MIXTA-like transcriptional regulator MYB106." <i>Plant Physiology</i> 148, no. 3 (2008): 1583-1602.    |
| <i>Solyc02g030480.3</i> | 1.28       | probable cinnamyl alcohol dehydrogenase 6                               | CAD6      | Involved in lignin biosynthesis                                                                                                                                     | <i>Impaired lignin biosynthesis; Impaired plant cell wall growth/development</i>     | Costa, Michael A., R. Eric Collins, Aldwin M. Anterola, Fiona C. Cochrane, Laurence B. Davin, and Norman G. Lewis. "An in silico assessment of gene function and organization of the phenylpropanoid pathway metabolic networks in <i>Arabidopsis thaliana</i> and limitations thereof." <i>Phytochemistry</i> 64, no. 6 (2003): 1097-1112.                                           |
| <i>Solyc02g087190.1</i> | 1.22       | peroxidase 63                                                           | PER63     | Involved in oxidation of toxic reductants, lignin metabolism, suberization, auxin catabolism; Involved in response to environmental stresses                        | <i>Impaired plant defense; Impaired lignin metabolism; Impaired auxin catabolism</i> | Valério, Luisa, Mireille De Meyer, Claude Penel, and Christophe Dunand. "Expression analysis of the <i>Arabidopsis</i> peroxidase multigenic family." <i>Phytochemistry</i> 65, no. 10 (2004): 1331-1342.                                                                                                                                                                             |

| TomatoID                | DE in LsoB | NCBI Protein Name                          | Gene ID | Uniprot Description                                                                                                                | Putative Consequences for Infection                            | Citation                                                                                                                                                                                                                                                                                                                                                           |
|-------------------------|------------|--------------------------------------------|---------|------------------------------------------------------------------------------------------------------------------------------------|----------------------------------------------------------------|--------------------------------------------------------------------------------------------------------------------------------------------------------------------------------------------------------------------------------------------------------------------------------------------------------------------------------------------------------------------|
| <i>Solyc12g009110.2</i> | 1.20       | acetylserotonin O-methyltransferase        | ASMT    | Methyltransferase which catalyzes the production of melatonin; Involved in response to light stress                                | <i>Impaired development under light stress</i>                 | Shi, Haitao, Yunxie Wei, and Chaozu He. "Melatonin-induced CBF/DREB1s are essential for diurnal change of disease resistance and CCA1 expression in Arabidopsis." <i>Plant Physiology and Biochemistry</i> 100 (2016): 150-155.                                                                                                                                    |
| <i>Solyc10g017940.1</i> | 1.18       | photosystem II 44 kDa protein              | psbC    | Photosynthetic electron transporter in photosystem II                                                                              | <i>Impaired photosynthesis</i>                                 | Ahmed, Ibrar, Peter J. Matthews, Patrick J. Biggs, Muhammad Naeem, Patricia A. McLenachan, and Peter J. Lockhart. "Identification of chloroplast genome loci suitable for high-resolution phylogeographic studies of <i>C. olocasia esculenta</i> (L.) S chott (A raceae) and closely related taxa." <i>Molecular Ecology Resources</i> 13, no. 5 (2013): 929-937. |
| <i>Solyc11g066820.2</i> | 1.14       | glucomannan 4-beta-mannosyltransferase 2   | CSLA2   | Possesses glucomannan synthase and mannan synthase activities; Galactomannan is a noncellulosic polysaccharides of plant cell wall | <i>Impaired plant cell wall growth/development</i>             | Liepman, Aaron H., Curtis G. Wilkerson, and Kenneth Keegstra. "Expression of cellulose synthase-like (Csl) genes in insect cells reveals that CslA family members encode mannan synthases." <i>Proceedings of the National Academy of Sciences</i> 102, no. 6 (2005): 2221-2226.                                                                                   |
| <i>Solyc01g006370.3</i> | 1.14       | callose synthase 3-like                    | CALS3   | Involved in callose synthesis at the forming cell plate during cytokinesis                                                         | <i>Impaired callose synthesis; Impaired cell proliferation</i> | Chen, Xiong-Yan, Lin Liu, EunKyoung Lee, Xiao Han, Yeonggil Rim, Hyosub Chu, Seon-Won Kim, Fred Sack, and Jae-Yean Kim. "The Arabidopsis callose synthase gene GSL8 is required for cytokinesis and cell patterning." <i>Plant Physiology</i> 150, no. 1 (2009): 105-113.                                                                                          |
| <i>Solyc03g115380.2</i> | 1.12       | UDP-glucose 6-dehydrogenase 1-like         | UGD1    | Involved in the biosynthesis of UDP-glucuronic acid, providing nucleotide sugars for cell-wall polymers                            | <i>Impaired nucleotide transport for cell-wall polymers</i>    | Oka, Takuji, and Yoshifumi Jigami. "Reconstruction of de novo pathway for synthesis of UDP-glucuronic acid and UDP-xylose from intrinsic UDP-glucose in <i>Saccharomyces cerevisiae</i> ." <i>The FEBS journal</i> 273.12 (2006): 2645-2657.                                                                                                                       |
| <i>Solyc11g045260.1</i> | 1.11       | photosystem II 44 kDa protein              | psbC    | Photosynthetic electron transporter in photosystem II                                                                              | <i>Impaired photosynthesis</i>                                 | Ahmed, Ibrar, Peter J. Matthews, Patrick J. Biggs, Muhammad Naeem, Patricia A. McLenachan, and Peter J. Lockhart. "Identification of chloroplast genome loci suitable for high-resolution phylogeographic studies of <i>C. olocasia esculenta</i> (L.) S chott (A raceae) and closely related taxa." <i>Molecular Ecology Resources</i> 13, no. 5 (2013): 929-937. |
| <i>Solyc06g009940.1</i> | 1.11       | photosystem I P700 apoprotein A1           | psaA    | saA and PsaB bind P700, the primary electron donor of photosystem I; Necessary for photosynthesis                                  | <i>Impaired photosynthesis</i>                                 | Cournac, Laurent, Kevin Redding, Jacques Ravenel, Dominique Rumeau, Eve-Marie Josse, Marcel Kuntz, and Gilles Peltier. "Electron flow between photosystem II and oxygen in chloroplasts of photosystem I-deficient algae is mediated by a quinol oxidase involved in chlororespiration." <i>Journal of Biological Chemistry</i> 275, no. 23 (2000): 17256-17262.   |
| <i>Solyc04g014510.3</i> | 1.10       | glutamine synthetase cytosolic isozyme 1-1 | GLN1-1  | High-affinity glutamine synthetase; Contributes to the homeostatic control of glutamine synthesis in roots                         | <i>Impaired glutamine homeostasis in the roots</i>             | Ishiyama, Keiki, Eri Inoue, Akiko Watanabe-Takahashi, Mitsuhiro Obara, Tomoyuki Yamaya, and Hideki Takahashi. "Kinetic properties and ammonium-dependent regulation of cytosolic isoenzymes of glutamine synthetase in Arabidopsis." <i>Journal of Biological Chemistry</i> 279, no. 16 (2004): 16598-16605.                                                       |

| TomatoID                | DE in LsoB | NCBI Protein Name                     | Gene ID | Uniprot Description                                                                                                 | Putative Consequences for Infection                    | Citation                                                                                                                                                                                                                                                                                                                                                                                                |
|-------------------------|------------|---------------------------------------|---------|---------------------------------------------------------------------------------------------------------------------|--------------------------------------------------------|---------------------------------------------------------------------------------------------------------------------------------------------------------------------------------------------------------------------------------------------------------------------------------------------------------------------------------------------------------------------------------------------------------|
| <i>Solyc06g062580.3</i> | 1.10       | beta-galactosidase-like               | BGAL1   | Involved in carbohydrate metabolic process                                                                          | <i>Impaired carbohydrate metabolism</i>                | Cartieaux, Fabienne, Céline Contesto, Adrien Gallou, Guilhem Desbrosses, Joachim Kopka, Ludivine Tacconat, Jean-Pierre Renou, and Bruno Touraine. "Simultaneous interaction of Arabidopsis thaliana with Bradyrhizobium sp. strain ORS278 and Pseudomonas syringae pv. tomato DC3000 leads to complex transcriptome changes." Molecular plant-microbe interactions 21, no. 2 (2008): 244-259.           |
| <i>Solyc12g009300.3</i> | 1.10       | sucrose synthase                      | SUS1    | Sucrose-cleaving enzyme that provides UDP-glucose and fructose for various metabolic pathways                       | <i>Impaired sugar metabolism</i>                       | Bieniawska, Zuzanna, D. H. Paul Barratt, Andrew P. Garlick, Vera Thole, Nicholas J. Kruger, Cathie Martin, Rita Zrenner, and Alison M. Smith. "Analysis of the sucrose synthase gene family in Arabidopsis." The Plant Journal 49, no. 5 (2007): 810-828.                                                                                                                                               |
| <i>Solyc01g017740.1</i> | 1.07       | cytochrome b6                         | petB    | Component of the cytochrome b6-f complex, which mediates electron transfer between photosystem II and photosystem I | <i>Impaired photosynthesis</i>                         | Felder, Susanne, Karin Meierhoff, Aniruddha P. Sane, Jörg Meurer, Christiane Driemel, Henning Plücker, Petra Klaff, Bernhard Stein, Nicole Bechtold, and Peter Westhoff. "The nucleus-encoded HCF107 gene of Arabidopsis provides a link between intergenic RNA processing and the accumulation of translation-competent psbH transcripts in chloroplasts." The Plant Cell 13, no. 9 (2001): 2127-2141. |
| <i>Solyc06g068770.3</i> | 1.06       | probable beta-1,4-xylosyltransferase  | IRX9H   | Involved in the synthesis of the hemicellulose glucuronoxylan, a major component of secondary cell walls            | <i>Impaired secondary plant cell wall biosynthesis</i> | Lee, Chanhui, Quincy Teng, Wenlin Huang, Ruiqin Zhong, and Zheng-Hua Ye. "The Arabidopsis family GT43 glycosyltransferases form two functionally nonredundant groups essential for the elongation of glucuronoxylan backbone." Plant Physiology 153, no. 2 (2010): 526-541.                                                                                                                             |
| <i>Solyc03g032040.3</i> | 1.05       | monosaccharide-sensing protein 2-like | MSSP2   | Involved in carbohydrate transport                                                                                  | <i>Impaired carbohydrate transport</i>                 | Wormit, Alexandra, Oliver Trentmann, Ingmar Feifer, Christian Lohr, Joachim Tjaden, Stefan Meyer, Ulrike Schmidt, Enrico Martinoia, and H. Ekkehard Neuhaus. "Molecular identification and physiological characterization of a novel monosaccharide transporter from Arabidopsis involved in vacuolar sugar transport." The Plant Cell 18, no. 12 (2006): 3476-3490.                                    |
| <i>Solyc11g069270.2</i> | 1.02       | beta-galactosidase 5                  | BGAL5   | Involved in carbohydrate metabolic process                                                                          | <i>Impaired carbohydrate metabolism</i>                | Gantulga, Dashzeveg, Yusuf Turan, David R. Bevan, and Asim Esen. "The Arabidopsis At1g45130 and At3g52840 genes encode $\beta$ -galactosidases with activity toward cell wall polysaccharides." Phytochemistry 69, no. 8 (2008): 1661-1670.                                                                                                                                                             |
| <i>Solyc02g067360.3</i> | 1.02       | protease Do-like 8, chloroplastic     | DEGP8   | Serine protease involved in photosystem II repair                                                                   | <i>Impaired photosynthesis</i>                         | Giacomelli, Lisa, Andrea Rudella, and Klaas Jan van Wijk. "High light response of the thylakoid proteome in Arabidopsis wild type and the ascorbate-deficient mutant vtc2-2. A comparative proteomics study." Plant Physiology 141, no. 2 (2006): 685-701.                                                                                                                                              |

| TomatoID         | DE in LsoB | NCBI Protein Name                                                      | Gene ID | Uniprot Description                                                                                                                                                 | Putative Consequences for Infection                                                      | Citation                                                                                                                                                                                                                                                                                                                                             |
|------------------|------------|------------------------------------------------------------------------|---------|---------------------------------------------------------------------------------------------------------------------------------------------------------------------|------------------------------------------------------------------------------------------|------------------------------------------------------------------------------------------------------------------------------------------------------------------------------------------------------------------------------------------------------------------------------------------------------------------------------------------------------|
| Solyc05g012510.3 | 1.01       | alpha-1,4 glucan phosphorylase L-2 isozyme, chloroplastic/amyloplastic | N/A     | Important allosteric enzyme in carbohydrate metabolism                                                                                                              | <i>Impaired carbohydrate metabolism</i>                                                  | Lin, Chi-Tsai, Kai-Wun Yeh, Ping-Du Lee, and Jong-Ching Su. "Primary structure of sweet potato starch phosphorylase deduced from its cDNA sequence." <i>Plant physiology</i> 95, no. 4 (1991): 1250-1253.                                                                                                                                            |
| Solyc02g077080.3 | -1.07      | protein trichome birefringence-like 38                                 | TBL38   | Bridging protein that binds pectin and other cell wall polysaccharides                                                                                              | Promoted pectin-binding; Promoted plant cell wall growth and development                 | Bischoff, Volker, Joachim Selbig, and Wolf-Rüdiger Scheible. "Involvement of TBL/DUF231 proteins into cell wall biology." <i>Plant signaling &amp; behavior</i> 5, no. 8 (2010): 1057-1059.                                                                                                                                                          |
| Solyc05g046290.3 | -1.14      | probable xyloglucan endotransglucosylase/hydrolase protein 23          | XTH23   | Cleaves and religates xyloglucan polymers, an essential constituent of the primary cell wall, and thereby participates in cell wall construction of growing tissues | Promoted plant growth and development                                                    | Bischoff, Volker, Sarah Jane Cookson, Shuang Wu, and Wolf-Rüdiger Scheible. "Thaxtomin A affects CESA-complex density, expression of cell wall genes, cell wall composition, and causes ectopic lignification in <i>Arabidopsis thaliana</i> seedlings." <i>Journal of experimental botany</i> 60, no. 3 (2009): 955-965.                            |
| Solyc07g042550.3 | -1.19      | sucrose synthase                                                       | SUS1    | Sucrose-cleaving enzyme that provides UDP-glucose and fructose for various metabolic pathways                                                                       | Promoted sugar metabolism                                                                | Bieniawska, Zuzanna, D. H. Paul Barratt, Andrew P. Garlick, Vera Thole, Nicholas J. Kruger, Cathie Martin, Rita Zrenner, and Alison M. Smith. "Analysis of the sucrose synthase gene family in <i>Arabidopsis</i> ." <i>The Plant Journal</i> 49, no. 5 (2007): 810-828.                                                                             |
| Solyc09g059040.3 | -1.37      | fructose-bisphosphate aldolase                                         | FBA1    | Plays a key role in glycolysis and gluconeogenesis                                                                                                                  | Promoted glycolysis and glucogenesis                                                     | Searle, Iain R., Artem E. Men, Titeki S. Laniya, Diana M. Buzas, Inaki Iturbe-Ormaetxe, Bernard J. Carroll, and Peter M. Gresshoff. "Long-distance signaling in nodulation directed by a CLAVATA1-like receptor kinase." <i>Science</i> 299, no. 5603 (2003): 109-112.                                                                               |
| Solyc03g113430.3 | -1.37      | protein NRT1/ PTR FAMILY 2.11                                          | NPF2.11 | High-affinity, proton-dependent glucosinolate-specific transporter; Involved in removal of glucosinolates from the xylem in roots                                   | Promoted glucosinolate homeostasis                                                       | Nour-Eldin, Hussam Hassan, Tonni Grube Andersen, Meike Burow, Svend Roesen Madsen, Morten Egevang Jørgensen, Carl Erik Olsen, Ingo Dreyer, Rainer Hedrich, Dietmar Geiger, and Barbara Ann Halkier. "NRT/PTR transporters are essential for translocation of glucosinolate defence compounds to seeds." <i>Nature</i> 488, no. 7412 (2012): 531-534. |
| Solyc12g006380.2 | -1.68      | 2-oxoglutarate-dependent dioxygenase                                   | AOP3    | Involved in glucosinolates biosynthesis                                                                                                                             | Promoted glucosinolate biosynthesis                                                      | Kliebenstein, Daniel J., Virginia M. Lambrix, Michael Reichelt, Jonathan Gershenzon, and Thomas Mitchell-Olds. "Gene duplication in the diversification of secondary metabolism: tandem 2-oxoglutarate-dependent dioxygenases control glucosinolate biosynthesis in <i>Arabidopsis</i> ." <i>The Plant Cell</i> 13, no. 3 (2001): 681-693.           |
| Solyc03g114890.3 | -1.84      | COBRA-like protein 4 isoform X2                                        | COBL4   | Involved in cellulose microfibril organization; Involved in plant cell wall cellulose biosynthesis; Involved in secondary cell wall biogenesis                      | Promoted plant cell wall cellulose biosynthesis; Promoted secondary cell wall biogenesis | Brown, David M., Leo AH Zeef, Joanne Ellis, Royston Goodacre, and Simon R. Turner. "Identification of novel genes in <i>Arabidopsis</i> involved in secondary cell wall formation using expression profiling and reverse genetics." <i>The Plant Cell</i> 17, no. 8 (2005): 2281-2295.                                                               |

| TomatoID         | DE in LsoB | NCBI Protein Name         | Gene ID   | Uniprot Description                                                                                                                                                                                   | Putative Consequences for Infection                                                                                                                                                                 | Citation                                                                                                                                                                                                                                                                                                                                                                                                                                                          |
|------------------|------------|---------------------------|-----------|-------------------------------------------------------------------------------------------------------------------------------------------------------------------------------------------------------|-----------------------------------------------------------------------------------------------------------------------------------------------------------------------------------------------------|-------------------------------------------------------------------------------------------------------------------------------------------------------------------------------------------------------------------------------------------------------------------------------------------------------------------------------------------------------------------------------------------------------------------------------------------------------------------|
| Solyc09g007520.3 | -2.27      | peroxidase 21             | PER21     | Involved in removal of H <sub>2</sub> O <sub>2</sub> , oxidation of toxic reductants, biosynthesis and degradation of lignin, suberization, auxin catabolism, and response to environmental stressors | Increased removal of H <sub>2</sub> O <sub>2</sub> , oxidation of toxic reductants, biosynthesis and degradation of lignin, suberization, auxin catabolism, and response to environmental stressors | Mosher, Rebecca A., Wendy E. Durrant, Dong Wang, Junqi Song, and Xinnian Dong. "A comprehensive structure–function analysis of Arabidopsis SNI1 defines essential regions and transcriptional repressor activity." <i>The Plant Cell</i> 18, no. 7 (2006): 1750-1765.                                                                                                                                                                                             |
| Solyc03g033840.3 | -2.57      | AAA-ATPase At3g50940-like | At3g50940 | Involved in lignin biosynthesis and response to salt stress                                                                                                                                           | Promoted lignin biosynthesis; Promoted response to salt stress                                                                                                                                      | van de Mortel, Judith E., Laia Almar Villanueva, Henk Schat, Jeroen Kwekkeboom, Sean Coughlan, Perry D. Moerland, Emiel Ver Loren van Themaat, Maarten Koornneef, and Mark GM Aarts. "Large expression differences in genes for iron and zinc homeostasis, stress response, and lignin biosynthesis distinguish roots of Arabidopsis thaliana and the related metal hyperaccumulator Thlaspi caerulescens." <i>Plant physiology</i> 142, no. 3 (2006): 1127-1147. |
